# Supplementary material for: Southern Hemisphere Hotspots Traced Back to Distinct Paleo-Subduction Zones
Source: Research Square preprint supplement (doi:10.21203/rs.3.rs-7827767/v1), 2025-11-28
Supplement: Supplementary file 1 [file f623538654e05d42470627b7.xlsx]

## Sheet: BOUVET
CITATIONS	TECTONIC SETTING	LOCATION	LOCATION COMMENT	LATITUDE MIN	LATITUDE MAX	LONGITUDE MIN	LONGITUDE MAX	LAND OR SEA	ELEVATION MIN	ELEVATION MAX	SAMPLE NAME	ROCK NAME	MIN. AGE (YRS.)	MAX. AGE (YRS.)	GEOL.	AGE	ERUPTION DAY	ERUPTION MONTH	ERUPTION YEAR	ROCK TEXTURE	ROCK TYPE	DRILL DEPTH MIN	DRILL DEPTHAX	ALTERATION	MINERAL	MATERIAL	SIO2(WT%)	TIO2(WT%)	B2O3(WT%)	AL2O3(WT%)	CR2O3(WT%)	FE2O3(WT%)	FEO(WT%)	FEOT(WT%)	CAO(WT%)	MGO(WT%)	MNO(WT%)	NIO(WT%)	K2O(WT%)	NA2O(WT%)	P2O5(WT%)	H2O(WT%)	H2OP(WT%)	H2OM(WT%)	H2OT(WT%)	CO2(WT%)	CO1(WT%)	F(WT%)	CL(WT%)
[752][747][753]	OCEAN ISLAND	BOUVET / BOUVET	NORTH END OF WESTWIND STRANDA	-54.43	-54.43	3.4	3.4	SAE			s_WJ8B [752]	HAWAIITE [752] / BASALT [753]								HIGHLY PORPHYRITIC [752]	VOL				HE3_HE4(R/R(A)) from PLAGIOCLASE [753]	WR [752] / MIN [753]	48.45	2.18		19.93		3.99	4.12		11.44	3.43	0.1		0.72	3.43	0.37			0.37
[752][747]	OCEAN ISLAND	BOUVET / BOUVET	NORTH END OF WESTWIND STRANDA	-54.43	-54.43	3.4	3.4	SAE			s_WJ7B [752]	HAWAIITE [752]								DENSE, WITH DISSEMINATED PHENOCRYSTS [752]	VOL					WR [752]	46.98	3.78		14.68		5.24	7.17		8.91	4.13	0.18		1.05	3.21	0.43		1.73	0.78		1.98
[752][747]	OCEAN ISLAND	BOUVET / BOUVET	KAPP CIRCONCISION, DIKE	-54.43	-54.43	3.4	3.4	SAE			s_WJ17B [752]	HAWAIITE [752]								PORPHYRITIC [752]	VOL					WR [752]	49.41	2.94		17.08		4.22	6		9.73	3.75	0.15		1.04	3.31	0.48		0.85	0.83
[752][747]	OCEAN ISLAND	BOUVET / BOUVET	TOP OF RUSTADKOLLEN	-54.43	-54.43	3.4	3.4	SAE	366	366	s_WJ2B [752]	HAWAIITE [752]								PORPHYRITIC [752]	VOL					WR [752]	50.13	3.5		15.38		3.39	8.92		8.72	4.3	0.19		1.31	3.36	0.49		0.27	0.06
[752][747]	OCEAN ISLAND	BOUVET / BOUVET	STORE KARI	-54.43	-54.43	3.4	3.4	SAE			s_WJ14B [752]	HAWAIITE [752]								PORPHYRITIC [752]	VOL					WR [752]	48.53	3.65		14.84		4.92	7.56		8.62	4.08	0.18		1.25	3.48	0.44		0.93	0.42		0.97
[752][747]	OCEAN ISLAND	BOUVET / BOUVET	KAPP CIRCONCISION	-54.43	-54.43	3.4	3.4	SAE			s_WJ16B [752]	HAWAIITE [752]								PORPHYRITIC [752]	VOL					WR [752]	49.66	3.27		15.85		3.9	8.25		7.54	3.78	0.21		1.29	3.6	0.62		1.43	0.39		0.56
[752][747]	OCEAN ISLAND	BOUVET / BOUVET	KAPP FIE	-54.43	-54.43	3.4	3.4	SAE			s_WJ1B [752]	MUGEARITE [752]								APHYRIC [752]	VOL					WR [752]	54.37	1.95		15.55		2.89	8.35		5.98	2.17	0.21		2.25	4.32	0.65		0.76	0.29		0.56
[752][747]	OCEAN ISLAND	BOUVET / BOUVET	HIGHEST PART OF WESTWIND STRANDA	-54.43	-54.43	3.4	3.4	SAE			s_WJ5B [752]	BENMOREITE [752]								PORPHYRITIC [752]	VOL					WR [752]	60.59	1.1		15.65		1.63	7.29		4.32	0.99	0.28		2.98	4.42	0.32		0.3	0.05
[752][747]	OCEAN ISLAND	BOUVET / BOUVET	HIGHEST PART OF WESTWIND STRANDA	-54.43	-54.43	3.4	3.4	SAE			s_WJ11B [752]	BENMOREITE [752]								GLASSY [752]	VOL					WR [752]	59.72	1.14		14.59		2.83	6.3		3.91	1.13	0.24		2.88	4.85	0.37			0.04
[752][747][9837]	OCEAN ISLAND	BOUVET / BOUVET	WESTWIND STRANDA	-54.43	-54.43	3.4	3.4	SAE			s_WJ10B [752]	BENMOREITE [752] / HAWAIITE [747] / NOT GIVEN [9837]								DENSE WITH SMALL PHENOCRYSTS [752]	VOL					WR [752]	59.12	1.09		14.26		3.32	5.41		3.79	1	0.24		3.06	4.62	0.35			0.25
[752][747]	OCEAN ISLAND	BOUVET / BOUVET	LARS÷YA	-54.43	-54.43	3.4	3.4	SAE			s_WJ18B [752]	RHYOLITE [752]								FLOW-BANDED [752]	VOL					WR [752]	69.56	0.3		13.29		1.84	2.7		0.76	0.09	0.12		4.85	5.33	0.01			0.02
[507]	OCEAN ISLAND	BOUVET / BOUVET		-54.43	-54.43	3.42	3.42	SAE			s_BV-13 [507]	TRACHYTE [507]							1955		VOL					WR [507]
[507]	OCEAN ISLAND	BOUVET / BOUVET		-54.43	-54.43	3.42	3.42	SAE			s_BV-17 [507]	BASALT [507]									VOL					WR [507]													0.15	2.36
[507]	OCEAN ISLAND	BOUVET / BOUVET		-54.43	-54.43	3.42	3.42	SAE			s_BV-18 [507]	BASALT [507]									VOL					WR [507]													0.73	2.55
[752]	OCEAN ISLAND	BOUVET / BOUVET	HIGHEST PART OF WESTWIND STRANDA	-54.43	-54.43	3.4	3.4	SAE			s_N420A [752]	BENMOREITE [752]								GLASSY, VITROPHYRIC [752]	VOL					WR [752]	60.24	1.2		14.69		1.71	8.03		3.91	1.08	0.33		2.93	4.73	0.39		0.19	0.2
[752]	OCEAN ISLAND	BOUVET / BOUVET	HIGHEST PART OF WESTWIND STRANDA	-54.43	-54.43	3.4	3.4	SAE			s_N421A [752]	BENMOREITE [752]								PORPHYRITIC [752]	VOL					WR [752]	60.17	1.34		14.72		6.49	3.18		3.61	0.88	0.27		2.9	4.76	0.37		0.87	0.84
[750]	OCEAN ISLAND	BOUVET / BOUVET	SJ÷ELEFANTSTRANDA	-54.43	-54.43	3.4	3.4	SAE			s_1 [750]	BASALT, TRANSITIONAL [750]								GLOMEROPORPHYRITIC, PILOTAXITIC, VESICULAR [750]	VOL					WR [750]	48.93	2.36		18.65		2.26	6.73		11.17	4.12	0.14		0.79	3.23	0.44	0.68
[750]	OCEAN ISLAND	BOUVET / BOUVET	SJ÷ELEFANTSTRANDA	-54.43	-54.43	3.4	3.4	SAE			s_2 [750]	BASALT, TRANSITIONAL [750]								GLOMEROPORPHYRITIC [750]	VOL					WR [750]	49.1	3.01		15.44		3.11	7.86		10.01	4.58	0.16		1.05	3.28	0.57	0.87				0.06
[750]	OCEAN ISLAND	BOUVET / BOUVET	SJ÷ELEFANTSTRANDA	-54.43	-54.43	3.4	3.4	SAE			s_3 [750]	BASALT, TRANSITIONAL [750]								GLOMEROPORPHYRITIC, PILOTAXITIC [750]	VOL					WR [750]	48.76	3.56		14.12		6.23	7.13		8.71	3.85	0.18		1.26	3.36	0.61	1.57				0.04
[750]	OCEAN ISLAND	BOUVET / BOUVET	LARS÷YA	-54.43	-54.43	3.4	3.4	SAE			s_4 [750]	BASALT, TRANSITIONAL [750]								GLOMEROPORPHYRITIC, PILOTAXITIC, VESICULAR [750]	VOL					WR [750]	50.49	3.45		13.9		11.82	1.07		9.28	4.57	0.18		1.02	3.45	0.58	0.68
[750]	OCEAN ISLAND	BOUVET / BOUVET	LARS÷YA	-54.43	-54.43	3.4	3.4	SAE			s_5 [750]	BASALT, TRANSITIONAL [750]								GLOMEROPORPHYRITIC, VESICULAR [750]	VOL					WR [750]	51.18	2.99		14.46		2.94	8.79		7.96	3.55	0.19		1.46	3.81	0.62	1.61				0.5
[750]	OCEAN ISLAND	BOUVET / BOUVET	LARS÷YA	-54.43	-54.43	3.4	3.4	SAE			s_6 [750]	BASALT, TRANSITIONAL [750]								GLOMEROPORPHYRITIC [750]	VOL					WR [750]	48.35	2.84		15.4		6.91	4.7		10.02	4.53	0.15		0.82	3.54	0.5	1.76
[750]	OCEAN ISLAND	BOUVET / BOUVET	LARS÷YA	-54.43	-54.43	3.4	3.4	SAE			s_7 [750]	BASALT, TRANSITIONAL [750]								GLOMEROPORPHYRITIC [750]	VOL					WR [750]	48.73	2.74		15.57		6.54	4.84		10.43	4.47	0.15		0.8	3.4	0.55	1.67
[750]	OCEAN ISLAND	BOUVET / BOUVET	RUSTADKOLLEN	-54.43	-54.43	3.4	3.4	SAE			s_8 [750]	BASALT, TRANSITIONAL [750]								GLOMEROPORPHYRITIC, PILOTAXITIC [750]	VOL					WR [750]	50.63	3.53		15.07		4.33	8.39		8.85	3.92	0.18		1.24	3.57	0.45	0.6
[750]	OCEAN ISLAND	BOUVET / BOUVET	RUSTADKOLLEN	-54.43	-54.43	3.4	3.4	SAE			s_9 [750]	BASALT, TRANSITIONAL [750]								GLOMEROPORPHYRITIC [750]	VOL					WR [750]	49.86	3.51		14.8		5.97	6.9		9.02	4.23	0.18		1.24	3.48	0.49	0.59
[750]	OCEAN ISLAND	BOUVET / BOUVET	NORVEGIAODDEN	-54.43	-54.43	3.4	3.4	SAE			s_10 [750]	BASALT, TRANSITIONAL [750]								GLOMEROPORPHYRITIC, PILOTAXITIC [750]	VOL					WR [750]	48.26	2.75		15.57		6.7	4.92		10.16	4.37	0.16		0.75	3.21	0.6	1.72				0.04
[750]	OCEAN ISLAND	BOUVET / BOUVET		-54.43	-54.43	3.42	3.42	SAE			s_11 [750]	BASALT, TRANSITIONAL [750]								GLOMEROPORPHYRITIC, PILOTAXITIC, VESICULAR [750]	VOL					WR [750]	49.47	2.87		16.54		3.35	7.49		10.32	4.36	0.16		1.02	3.22	0.54	0.91
[750]	OCEAN ISLAND	BOUVET / BOUVET	SOUTHWEST OF BOUVET	-54.43	-54.43	3.4	3.4	SAQ			s_12 [750]	BASALT, TRANSITIONAL [750]								GLOMEROPORPHYRITIC [750]	VOL					WR [750]	48.56	3.06		14.27		5.84	5.54		9.65	3.97	0.14		1.21	3.63	0.58	2.18				0.24
[750]	OCEAN ISLAND	BOUVET / BOUVET	SOUTHWEST OF BOUVET	-54.43	-54.43	3.4	3.4	SAQ			s_13 [750]	BASALT, TRANSITIONAL [750]								PILOTAXITIC [750]	VOL					WR [750]	51.32	3.01		14.49		3.83	7.99		7.78	3.26	0.2		1.65	4.32	0.73	0.73
[750]	OCEAN ISLAND	BOUVET / BOUVET	SOUTHWEST OF BOUVET	-54.43	-54.43	3.4	3.4	SAQ			s_14 [750]	BASALT, TRANSITIONAL [750]								GLOMEROPORPHYRITIC, VESICULAR [750]	VOL					WR [750]	49.32	3.12		14.13		5.94	6.01		9.3	4.12	0.16		1.29	3.7	0.57	1.52
[750]	OCEAN ISLAND	BOUVET / BOUVET	SOUTHWEST OF BOUVET	-54.43	-54.43	3.4	3.4	SAQ			s_15 [750]	BASALT, TRANSITIONAL [750]								GLOMEROPORPHYRITIC, PILOTAXITIC, VESICULAR [750]	VOL					WR [750]	48.96	2.34		15.55		7.81	4.12		10.21	4.15	0.13		0.9	3.75	0.5	2.05
[750]	OCEAN ISLAND	BOUVET / BOUVET	SOUTHWEST OF BOUVET	-54.43	-54.43	3.4	3.4	SAQ			s_16 [750]	BASALT, TRANSITIONAL [750]								GLOMEROPORPHYRITIC, PILOTAXITIC, VESICULAR [750]	VOL					WR [750]	49.09	2.99		15.71		4.3	6.32		10.18	3.72	0.16		1.09	3.73	0.53	0.98				0.14
[750]	OCEAN ISLAND	BOUVET / BOUVET	WESTWIND STRANDA	-54.43	-54.43	3.4	3.4	SAE			s_17 [750]	ICELANDITE, TRACHYTIC [750]								GLOMEROPORPHYRITIC [750]	VOL					WR [750]	60.05	1.11		15		3.82	5.46		3.98	1.05	0.25		2.89	5.1	0.28	1.01
[750]	OCEAN ISLAND	BOUVET / BOUVET	LARS÷YA	-54.43	-54.43	3.4	3.4	SAE			s_18 [750]	ICELANDITE, TRACHYTIC [750]								GLOMEROPORPHYRITIC [750]	VOL					WR [750]	60.61	1.15		15.16		1.43	7.79		4.14	1.02	0.26		2.92	5.02	0.3	0.12
[750]	OCEAN ISLAND	BOUVET / BOUVET	LARS÷YA	-54.43	-54.43	3.4	3.4	SAE			s_19 [750]	ICELANDITE, TRACHYTIC [750]									VOL					WR [750]	59.52	1.14		14.82		2.55	6.62		4.04	0.98	0.22		2.97	4.64	0.29	1.86
[750]	OCEAN ISLAND	BOUVET / BOUVET	LARS÷YA	-54.43	-54.43	3.4	3.4	SAE			s_20 [750]	COMENDITE [750]								MICROCRYSTALLINE GROUNDMASS [750]	VOL					WR [750]	68.64	0.26		13.42		1.94	2.64		0.68	0.05	0.09		4.81	5.34	0.06	0.37
[750]	OCEAN ISLAND	BOUVET / BOUVET	LARS÷YA	-54.43	-54.43	3.4	3.4	SAE			s_21 [750]	COMENDITE [750]								MICROCRYSTALLINE GROUNDMASS, VESICULAR [750]	VOL					WR [750]	68.51	0.27		13.56		2.41	2.1		0.76	0.02	0.1		4.8	5.48	0.02	1.65
[750]	OCEAN ISLAND	BOUVET / BOUVET	LARS÷YA	-54.43	-54.43	3.4	3.4	SAE			s_22 [750]	COMENDITE [750]								VESICULAR [750]	VOL					WR [750]	68.97	0.27		13.32		0.95	3.24		0.82	0.05	0.1		4.7	5.84	0.03	0.41
[750]	OCEAN ISLAND	BOUVET / BOUVET	LARS÷YA	-54.43	-54.43	3.4	3.4	SAE			s_23 [750]	COMENDITE [750]								VESICULAR [750]	VOL					GL [750]	68.74	0.29		13.46		2.21	2.15		0.71	0.05	0.1		4.7	5.6	0.23	0.34				0.02
[750]	OCEAN ISLAND	BOUVET / BOUVET	LARS÷YA	-54.43	-54.43	3.4	3.4	SAE			s_24 [750]	COMENDITE [750]								MICROCRYSTALLINE GROUNDMASS, VESICULAR [750]	VOL					WR [750]	68.29	0.3		13.88		1.69	2.69		0.73	0.05	0.1		4.8	5.64	0.15	0.3
[750]	OCEAN ISLAND	BOUVET / BOUVET	LARS÷YA	-54.43	-54.43	3.4	3.4	SAE			s_25 [750]	COMENDITE [750]								MICROCRYSTALLINE GROUNDMASS, VESICULAR [750]	VOL					WR [750]	68.68	0.28		13.64		2.77	1.78		0.65	0.04	0.09		4.79	5.5	0.25	0.58
[750]	OCEAN ISLAND	BOUVET / BOUVET	LARS÷YA	-54.43	-54.43	3.4	3.4	SAE			s_26 [750]	COMENDITE [750]								MICROCRYSTALLINE GROUNDMASS, SNOFLAKE TEXTURE, VESICULAR [750]	VOL					WR [750]	68.29	0.28		13.19		3.29	1.32		0.44	0.01	0.07		4.79	5.72	0.11	0.45				0.03
[750]	OCEAN ISLAND	BOUVET / BOUVET	LARS÷YA	-54.43	-54.43	3.4	3.4	SAE			s_27 [750]	COMENDITE [750]								MICROCRYSTALLINE GROUNDMASS, SNOFLAKE TEXTURE [750]	VOL					WR [750]	70.95	0.3		13.86		2.26	2.17		0.42	0.03	0.08		4.79	5.48	0.06	0.45
[750]	OCEAN ISLAND	BOUVET / BOUVET	SJ÷ELEFANTSTRANDA	-54.43	-54.43	3.4	3.4	SAE			s_28 [750]	COMENDITE [750]									VOL					GL [750]	68.94	0.24		13.4		0.98	3.34		0.72	0.01	0.1		4.77	5.8		0.24
[750]	OCEAN ISLAND	BOUVET / BOUVET	LARS÷YA	-54.43	-54.43	3.4	3.4	SAE			s_29 [750]	COMENDITE [750]									VOL					GL [750]	69.04	0.25		13		1.11	3.31		0.7	0.01	0.1		4.85	5.52		0.15
[750]	OCEAN ISLAND	BOUVET / BOUVET	LARS÷YA	-54.43	-54.43	3.4	3.4	SAE			s_30 [750]	COMENDITE [750]									VOL					GL [750]	69.09	0.27		13.1		1.05	3.38		0.72	0.02	0.11		4.77	5.84	0.08	0.2				0.28
[750]	OCEAN ISLAND	BOUVET / BOUVET	LARS÷YA	-54.43	-54.43	3.4	3.4	SAE			s_31 [750]	COMENDITE [750]									VOL					GL [750]	66.92	0.33		13.19		1.55	3.01		1	0.12	0.1		4.57	5.82	0.23	1.34				0.32
[482]	OCEAN ISLAND	BOUVET / BOUVET		-54.43	-54.43	3.42	3.42	SAE			s_148(2) [482]	BASALT [482]							1972		VOL					WR [482]	48.31	3.54		14.33				11.89	9.02	4.03	0.19		1.35	3.36	0.55
[482]	OCEAN ISLAND	BOUVET / BOUVET		-54.43	-54.43	3.42	3.42	SAE			s_148(1) [482]	BASALT [482]							1972		VOL					WR [482]	48.19	2.28		19.88				7.82	10.32	3.52	0.15		0.87	3.46	0.38
[482]	OCEAN ISLAND	BOUVET / BOUVET		-54.43	-54.43	3.42	3.42	SAE			s_149(4A) [482]	BASALT [482]							1972		VOL					WR [482]	48.32	3.54		13.37				12.89	8.32	3.66	0.23		1.61	3.72	0.69
[482]	OCEAN ISLAND	BOUVET / BOUVET		-54.43	-54.43	3.42	3.42	SAE			s_148(4) [482]	BASALT [482]							1972		VOL					WR [482]	48.94	3.46		14.15				11.23	8.97	4.47	0.18		1.31	3.72	0.53
[1427]	OCEAN ISLAND	BOUVET / BOUVET		-54.43	-54.43	3.42	3.42	SAE			s_B2 [1427]	COMENDITE [1427]									VOL					GL [1427]	70.2	0.31		12.55		1.14	3.1		0.77	0.02	0.11		4.82	5.72	0.03		0.25					0.18	0.31
[1427]	OCEAN ISLAND	BOUVET / BOUVET		-54.43	-54.43	3.42	3.42	SAE			s_WT18B [1427]	COMENDITE [1427]									VOL					GL [1427]	69.5	0.32		13.25		1.05	3.21		0.88	0.02	0.12		4.93	5.87	0.03		0.13					0.16	0.25
[747]	OCEAN ISLAND	BOUVET / BOUVET	HIGHEST PART OF WESTWIND STRANDA	-54.43	-54.43	3.4	3.4	SAE			s_N420A [747]	BENMOREITE [747]									VOL					WR [747]
[747]	OCEAN ISLAND	BOUVET / BOUVET	HIGHEST PART OF WESTWIND STRANDA	-54.43	-54.43	3.4	3.4	SAE			s_N421A [747]	BENMOREITE [747]									VOL					WR [747]
[747]	OCEAN ISLAND	BOUVET / BOUVET		-54.43	-54.43	3.42	3.42	SAE			s_OBSID [747]	NOT GIVEN [747]									VOL					GL [747]
[751]	OCEAN ISLAND	BOUVET / BOUVET		-54.228	-54.228	4.167	4.167	SAQ	-1800	-1800	s_8 [751]	BASALT [751]									VOL			F		GL [751]	51.19	1.61		15.15				8.73	11.53	7.24	0.18		0.49	3.17
[751]	OCEAN ISLAND	BOUVET / BOUVET		-54.228	-54.228	4.167	4.167	SAQ	-1800	-1800	s_9 [751]	BASALT [751]									VOL			F		GL [751]	50.7	1.29		15.24				8.02	13.16	8.37	0.14		0.39	2.28
[1214]	OCEAN ISLAND	BOUVET / BOUVET		-54.43	-54.43	3.42	3.42	SAE			s_148(1) [1214]	BASALT [1214]									VOL					WR [1214]
[1214]	OCEAN ISLAND	BOUVET / BOUVET		-54.43	-54.43	3.42	3.42	SAE			s_149(1) [1214]	BASALT [1214]									VOL					WR [1214]
[1214]	OCEAN ISLAND	BOUVET / BOUVET		-54.43	-54.43	3.42	3.42	SAE			s_149(4) [1214]	BASALT [1214]									VOL					WR [1214]
[181][1210][507]	OCEAN ISLAND	BOUVET / BOUVET		-54.43	-54.43	3.42	3.42	SAE			s_BV-1 [181]	TRACHYTE [181]									VOL					WR [181]
[507][181][1210]	OCEAN ISLAND	BOUVET / BOUVET		-54.43	-54.43	3.42	3.42	SAE			s_BV-2 [507]	TRACHYTE [507]									VOL					WR [507]
[507][181]	OCEAN ISLAND	BOUVET / BOUVET		-54.43	-54.43	3.42	3.42	SAE			s_BV-3 [507]	BASALT [507]									VOL					WR [507]													1.38	2.8
[507][181]	OCEAN ISLAND	BOUVET / BOUVET		-54.43	-54.43	3.42	3.42	SAE			s_BV-5 [507]	BASALT [507]									VOL					WR [507]													0.22	2.22
Abbreviations: MET: METAMORPHIC ROCK; PEG: PEGMATITE; PER: MANTLE XENOLITH; PLU: PLUTONIC ROCK; SED: SEDIMENTARY ROCK; VOL: VOLCANIC ROCK; VEIN: VEIN; ORE: ORE; WR: WHOLE ROCK; GL: VOLCANIC GLASS; MIN: MINERAL / COMPONENT (INCL. GROUNDMASS); INC: INCLUSION; LEACH: LEACH; SAE: SUBAERIAL; SAQ: SUBAQUATIC; F: FRESH; E: EXTENSIVELY ALTERED; M: MODERATELY ALTERED; S: SLIGHTLY ALTERED; T: ALMOST TOTALL…
References:
[181] O^NIONS R. K., HAMILTON P. J., EVENSEN N. M.: VARIATIONS IN 143ND/144 ND AND 87SR/86SR RATIOS IN OCEANIC BASALTS EARTH PLANET. SCI. LETT. 34 [1977] 13-22 doi: 10.1016/0012-821X(77)90100-5
[482] WEAVER B. L., WOOD D. A., TARNEY J., JORON J.-L.: GEOCHEMISTRY OF OCEAN ISLAND BASALTS FROM THE SOUTH ATLANTIC, ASCENSION, BOUVET, ST. HELENA, GOUGH AND TRISTAN DA CUNHA SPEC. PUBL. GEOL. SOC. LONDON 30 [1987] 253-267 doi: 10.1144/GSL.SP.1987.030.01.11
[507] O^NIONS R. K., PANKHURST R. J.: PETROGENETIC SIGNIFICANCE OF ISOTOPE AND TRACE ELEMENT VARIATIONS IN VOLCANIC ROCKS FROM THE MID-ATLANTIC J. PETROL. 15 [1974] 603-634 doi: 10.1093/petrology/15.3.603
[747] LE ROEX A. P., ERLANK A. J.: QUANTITATIVE EVALUATION OF FRACTIONAL CRYSTALLIZATION IN BOUVET ISLAND LAVAS J. VOLCANOL. GEOTHERM. RES. 13 [1982] 309-337 doi: 10.1016/0377-0273(82)90055-5
[750] IMSLAND P., LARSEN J. G., PRESTVIK T., SIGMOND E. M.: THE GEOLOGY AND PETROLOGY OF BOUVETOEYA, SOUTH ATLANTIC OCEAN LITHOS 10 [1977] 213-234 doi: 10.1016/0024-4937(77)90049-4
[751] WATSON E. B.: GLASS INCLUSIONS AS SAMPLES OF EARLY MAGMATIC LIQUID: DETERMINATIVE METHOD AND APPLICATION TO SOUTH ATLANTIC BASALT J. VOLCANOL. GEOTHERM. RES. 1 [1976] 73-84 doi: 10.1016/0377-0273(76)90019-6
[752] VERWOERD W. J., ERLANK A. J., KABLE E. J. D.: GEOLOGY AND GEOCHEMISTRY OF BOUVET ISLAND [1974] 203-237
[753] KURZ M. D., LE ROEX A. P., DICK H. J. B.: ISOTOPE GEOCHEMISTRY OF THE OCEANIC MANTLE NEAR THE BOUVET TRIPLE JUNCTION GEOCHIM. COSMOCHIM. ACTA 62 [1998] 841-852 doi: 10.1016/S0016-7037(97)00383-9
[1210] PATCHETT P. J., TATSUMOTO M.: HAFNIUM ISOTOPE VARIATIONS IN OCEANIC BASALTS GEOPHYS. RES. LETT. 7 [1980] 1077-1080 doi: 10.1029/GL007i012p01077
[1214] SUN SHEN-SU: LEAD ISOTOPIC STUDY OF YOUNG VOLCANIC ROCKS FROM MID-OCEAN RIDGES, OCEAN ISLANDS AND ISLAND ARCS PHIL. TRANS. ROY. SOC. LONDON A297 [1980] 409-445 doi: 10.1098/rsta.1980.0224
[1427] BAILEY D. K., MACDONALD R.: PETROCHEMICAL VARIATIONS AMONG MILDLY PERALKALINE (COMENDITE) OBSIDIANS FROM THE OCEANS AND CONTINENTS CONTRIB. MINERAL. PETROL. 28 [1970] 340-351 doi: 10.1007/BF00388955
[9837] BARRY T. L., PEARCE J. A., LEAT P. T., MILLAR I. L., LE ROEX A. P.: HF ISOTOPE EVIDENCE FOR SELECTIVE MOBILITY OF HIGH-FIELD-STRENGTH ELEMENTS IN A SUBDUCTION SETTING: SOUTH SANDWICH ISLANDS EARTH PLANET. SCI. LETT. 252 [2006] 223-244 GeoReM-id: 2499 doi: 10.1016/j.epsl.2006.09.034
[truncated: 121 more columns]

## Sheet: Discovery
CITATIONS	TECTONIC SETTING	LOCATION	LOCATION COMMENT	LATITUDE MIN	LATITUDE MAX	LONGITUDE MIN	LONGITUDE MAX	LAND OR SEA	ELEVATION MIN	ELEVATION MAX	SAMPLE NAME	ROCK NAME	MIN. AGE (YRS.)	MAX. AGE (YRS.)	GEOL.	AGE	ERUPTION DAY	ERUPTION MONTH	ERUPTION YEAR	ROCK TEXTURE	ROCK TYPE	DRILL DEPTH MIN	DRILL DEPTHAX	ALTERATION	MINERAL	MATERIAL	SIO2(WT%)	TIO2(WT%)	B2O3(WT%)	AL2O3(WT%)	CR2O3(WT%)	FE2O3(WT%)	FEO(WT%)	FEOT(WT%)	CAO(WT%)	MGO(WT%)	MNO(WT%)	NIO(WT%)	K2O(WT%)	NA2O(WT%)	P2O5(WT%)	H2O(WT%)	H2OP(WT%)	H2OM(WT%)	H2OT(WT%)	CO2(WT%)	CO1(WT%)	F(WT%)	CL(WT%)
[23592]	SEAMOUNT	DISCOVERY TABLEMOUNT / DISCOVERY TABLEMOUNT		-42	-42	0	0	SAQ			s_EW9309 5D 5G [23592]	BASALT [23592]									VOL					WR [23592]
[23592]	SEAMOUNT	DISCOVERY TABLEMOUNT / DISCOVERY TABLEMOUNT		-42	-42	0	0	SAQ			s_EW9309 3D3G [23592]	BASALT [23592]									VOL					WR [23592]
[23592]	SEAMOUNT	DISCOVERY TABLEMOUNT / DISCOVERY TABLEMOUNT		-42	-42	0	0	SAQ			s_EW9309 4D 2G [23592]	BASALT [23592]									VOL					WR [23592]
[23592]	SEAMOUNT	DISCOVERY TABLEMOUNT / DISCOVERY TABLEMOUNT		-42	-42	0	0	SAQ			s_EW9309 3D 1G [23592]	BASALT [23592]									VOL					WR [23592]
[23592]	SEAMOUNT	DISCOVERY TABLEMOUNT / DISCOVERY TABLEMOUNT		-42	-42	0	0	SAQ			s_EW9309 4D 3G [23592]	BASALT [23592]									VOL					WR [23592]
[1214]	SEAMOUNT	DISCOVERY TABLEMOUNT / DISCOVERY TABLEMOUNT	STATION 2493	-42.065	-42.065	0.058	0.058	SAQ	-472	-472	s_BM1954 [1214]	BASALT [1214]									VOL					WR [1214]
[2023]	SEAMOUNT	DISCOVERY TABLEMOUNT / DISCOVERY TABLEMOUNT	STATION 2493	-42.065	-42.065	0.058	0.058	SAQ	-472	-472	s_BM1954,152(1) [2023]	BASALT [2023]	24800 [2023]	800 [2023]						PILOTAXITIC OR SUBTRACHYTIC GROUNDMASS [2023]	VOL			F		WR [2023]	50.31	2.69		15.48		3.67	6.29		9.06	4.87	0.16		1.4	3.03	0.42		1.05	1.06		0.23
[2023]	SEAMOUNT	DISCOVERY TABLEMOUNT / DISCOVERY TABLEMOUNT	STATION 2493	-42.065	-42.065	0.058	0.058	SAQ	-472	-472	s_BM1954,152(2) [2023]	BASALT [2023]	24800 [2023]	800 [2023]						PILOTAXITIC OR SUBTRACHYTIC GROUNDMASS [2023]	VOL			E		WR [2023]	46.26	2.91		15.81		5.01	4.67		10.39	4.94	0.48		0.87	2.95	1.06		1.17	2.01		0.54
from Schwindrofska EPSL 2016				-42.862		0.582					MSM19/3 DR45-1	Tephriphonolite				33.71
from Schwindrofska EPSL 2016				-43.37		-2.575					MSM19/3 DR49-1	Alkali Basalt
from Schwindrofska EPSL 2016				-43.37		-2.575					MSM19/3 DR49-2	Alkali Basalt				22.86
from Schwindrofska EPSL 2016				-43.37		-2.575					MSM19/3 DR49-2*,**	Alkali Basalt
from Schwindrofska EPSL 2016				-43.37		-2.575					MSM19/3 DR49-5	Alkali Basalt
from Schwindrofska EPSL 2016				-43.37		-2.575					MSM19/3 DR49-5**	Alkali Basalt
from Schwindrofska EPSL 2016				-43.071		-2.469					MSM19/3 DR50-1	Volcaniclastite				24.78
from Schwindrofska EPSL 2016				-42.678		-1.426					MSM19/3 DR51-1	Alkali Basalt
from Schwindrofska EPSL 2016				-42.678		-1.426					MSM19/3 DR51-1**	Alkali Basalt
from Schwindrofska EPSL 2016				-42.678		-1.426					MSM19/3 DR51-2	Alkali Basalt				26.1
from Schwindrofska EPSL 2016				-41.713		2.084					MSM19/3 DR56-1	Alkali Basalt				39.6
from Schwindrofska EPSL 2016				-41.713		2.084					MSM19/3 DR56-2	Alkali Basalt
from Schwindrofska EPSL 2016				-43.192		1.396					MSM19/3 DR44-8	Phonolite				34.61
from Schwindrofska EPSL 2016				-43.54		-1.047					MSM19/3 DR46-1	Basalt				28.88
from Schwindrofska EPSL 2016				-43.54		-1.047					MSM19/3 DR46-5	Alkali Basalt				28.53
from Schwindrofska EPSL 2016				-42.385		0.943					MSM19/3 DR52-1	Alkali Basalt				35.35
from Schwindrofska EPSL 2016				-42.529		1.766					MSM19/3 DR53-1A	Alkali Basalt				38.33
from Schwindrofska EPSL 2016				-42.529		1.766					MSM19/3 DR53-5	Basalt				38.67
from Schwindrofska EPSL 2016				-42.205		2.369					MSM19/3 DR54-1	Basalt				37.39
from Schwindrofska EPSL 2016				-42.205		2.369					MSM19/3 DR54-1**	Basalt
from Schwindrofska EPSL 2016				-42.205		2.369					MSM19/3 DR54-4	Alkali Basalt
from Schwindrofska EPSL 2016				-42.205		2.369					MSM19/3 DR54-13	Basalt
Abbreviations: MET: METAMORPHIC ROCK; PEG: PEGMATITE; PER: MANTLE XENOLITH; PLU: PLUTONIC ROCK; SED: SEDIMENTARY ROCK; VOL: VOLCANIC ROCK; VEIN: VEIN; ORE: ORE; WR: WHOLE ROCK; GL: VOLCANIC GLASS; MIN: MINERAL / COMPONENT (INCL. GROUNDMASS); INC: INCLUSION; LEACH: LEACH; SAE: SUBAERIAL; SAQ: SUBAQUATIC; F: FRESH; E: EXTENSIVELY ALTERED; M: MODERATELY ALTERED; S: SLIGHTLY ALTERED; T: ALMOST TOTALL…
References:
[1214] SUN SHEN-SU: LEAD ISOTOPIC STUDY OF YOUNG VOLCANIC ROCKS FROM MID-OCEAN RIDGES, OCEAN ISLANDS AND ISLAND ARCS PHIL. TRANS. ROY. SOC. LONDON A297 [1980] 409-445 doi: 10.1098/rsta.1980.0224
[2023] KEMPE D. R. C., SCHILLING J.- G.: DISCOVERY TABLEMOUNT BASALT: PETROLOGY AND GEOCHEMISTRY CONTRIB. MINERAL. PETROL. 44 [1974] 101-115 doi: 10.1007/BF00385784
[23592] MUNDL-PETERMEIER A., WALKER R. J., FISCHER R. A., LEKIC V., JACKSON M. G., KURZ M. D.: ANOMALOUS 182W IN HIGH 3HE/4HE OCEAN ISLAND BASALTS: FINGERPRINTS OF EARTH^S CORE? GEOCHIM. COSMOCHIM. ACTA 271 [2020] 194-211 doi: 10.1016/j.gca.2019.12.020
[truncated: 121 more columns]

## Sheet: GOUGH
CITATIONS	TECTONIC SETTING	LOCATION	LOCATION COMMENT	LATITUDE MIN	LATITUDE MAX	LONGITUDE MIN	LONGITUDE MAX	LAND OR SEA	ELEVATION MIN	ELEVATION MAX	SAMPLE NAME	ROCK NAME	MIN. AGE (YRS.)	MAX. AGE (YRS.)	GEOL.	AGE	ERUPTION DAY	ERUPTION MONTH	ERUPTION YEAR	ROCK TEXTURE	ROCK TYPE	DRILL DEPTH MIN	DRILL DEPTHAX	ALTERATION	MINERAL	MATERIAL	SIO2(WT%)	TIO2(WT%)	B2O3(WT%)	AL2O3(WT%)	CR2O3(WT%)	FE2O3(WT%)	FEO(WT%)	FEOT(WT%)	CAO(WT%)	MGO(WT%)	MNO(WT%)	NIO(WT%)	K2O(WT%)	NA2O(WT%)	P2O5(WT%)	H2O(WT%)	H2OP(WT%)	H2OM(WT%)	H2OT(WT%)	CO2(WT%)	CO1(WT%)	F(WT%)	CL(WT%)
[103]	OCEAN ISLAND	GOUGH CHAIN / GOUGH		-40.32	-40.32	-9.92	-9.92	SAE			s_ALR7 [103]	BASALT [103]									VOL					WR [103]
[103]	OCEAN ISLAND	GOUGH CHAIN / GOUGH		-40.32	-40.32	-9.92	-9.92	SAE			s_ALR7 [103]	BASALT [103]									VOL					WR [103]
[103]	OCEAN ISLAND	GOUGH CHAIN / GOUGH / MIDDLE BASALTS		-40.32	-40.32	-9.92	-9.92	SAE			s_ALR40 [103]	BASALT [103]									VOL					WR [103]
[5216]	OCEAN ISLAND	GOUGH CHAIN / GOUGH		-40.32	-40.32	-9.92	-9.92	SAE			s_GH-36 [5216]	SHOSHONITE [5216]									VOL					WR [5216]	51.49	3.08		17.71		8.85	6.08		8.53	3.25	0.1		2.11	3.61	0.71
[528]	OCEAN ISLAND	GOUGH CHAIN / GOUGH		-40.32	-40.32	-9.92	-9.92	SAE			s_ALR35G [528]	BASALT, PICRITIC [528]									VOL					WR [528]	48.95	3.41		14.13				10.38	7.97	7.74	0.13		2.53	3.45	0.8
[528]	OCEAN ISLAND	GOUGH CHAIN / GOUGH		-40.32	-40.32	-9.92	-9.92	SAE			s_ALR7G [528]	BASALT, PICRITIC [528]									VOL					WR [528]	47.27	2.09		9.33				11.43	8.55	17.22	0.16		1.49	2.45	0.37
[528]	OCEAN ISLAND	GOUGH CHAIN / GOUGH / MIDDLE BASALTS		-40.32	-40.32	-9.92	-9.92	SAE			s_ALR23G [528]	BASALT [528]								APHYRIC TO PORPHYRITIC [528]	VOL					WR [528]	50.71	3.57		15.74				10.29	8.3	4.33	0.14		2.58	3.35	0.66
[528]	OCEAN ISLAND	GOUGH CHAIN / GOUGH / MIDDLE BASALTS		-40.32	-40.32	-9.92	-9.92	SAE			s_ALR31G [528]	TRACHYANDESITE [528]								PORPHYRITIC [528]	VOL					WR [528]	55.4	1.98		17.82				6.91	5.05	2.29	0.1		4.51	4.27	0.8
[528]	OCEAN ISLAND	GOUGH CHAIN / GOUGH / UPPER BASALTS		-40.32	-40.32	-9.92	-9.92	SAE			s_ALR60G [528]	TRACHYANDESITE [528]									VOL					WR [528]	51.22	2.66		17.15				8.8	5.54	4.43	0.13		3.82	4.17	0.89
[528]	OCEAN ISLAND	GOUGH CHAIN / GOUGH / UPPER BASALTS		-40.32	-40.32	-9.92	-9.92	SAE			s_ALR61G [528]	BASALT [528]								MODERATELY PHYRIC [528]	VOL					WR [528]	51.1	2.68		17.19				8.85	5.5	4.43	0.13		3.92	3.99	0.9
[528]	OCEAN ISLAND	GOUGH CHAIN / GOUGH / TRACHYTIC SERIES		-40.32	-40.32	-9.92	-9.92	SAE			s_ALR65R [528]	TRACHYTE [528]									VOL					WR [528]	60.29	0.72		18.39				5.14	2.22	1.03	0.15		6.38	5.27	0.41
[528]	OCEAN ISLAND	GOUGH CHAIN / GOUGH / TRACHYTIC SERIES		-40.32	-40.32	-9.92	-9.92	SAE			s_ALR59G [528]	TRACHYTE [528]									VOL					WR [528]	60.48	0.74		18.63				4.8	1.84	1.01	0.13		6.46	5.32	0.31
[528]	OCEAN ISLAND	GOUGH CHAIN / GOUGH / TRACHYTIC SERIES		-40.32	-40.32	-9.92	-9.92	SAE			s_ALR1G [528]	TRACHYTE [528]									VOL					WR [528]	60.12	0.8		17.88				4.92	2.02	0.89	0.15		6.59	5.9	0.32
[528]	OCEAN ISLAND	GOUGH CHAIN / GOUGH / TRACHYTIC SERIES		-40.32	-40.32	-9.92	-9.92	SAE			s_ALR16G [528]	TRACHYTE [528]									VOL					WR [528]	61.73	0.6		17.86				4.59	1.61	0.63	0.14		6.37	5.64	0.2
[528]	OCEAN ISLAND	GOUGH CHAIN / GOUGH / TRACHYTIC SERIES		-40.32	-40.32	-9.92	-9.92	SAE			s_ALR4G [528]	TRACHYTE, AEGIRINE-AUGITE [528]								HIGHLY VESICULAR [528]	VOL					WR [528]	62.26	0.27		17.63				5.06	1.39	0.24	0.2		5.78	6.75	0.09
[528]	OCEAN ISLAND	GOUGH CHAIN / GOUGH / TRACHYTIC SERIES		-40.32	-40.32	-9.92	-9.92	SAE			s_G19C [528]	TRACHYTE, AEGIRINE-AUGITE [528]									VOL					WR [528]	61.52	0.14		18				5.4	1.27	0.18	0.25		5.56	7.41	0.03
[7510][11317]	OCEAN ISLAND	GOUGH CHAIN / GOUGH / MIDDLE BASALTS		-40.32	-40.32	-9.92	-9.92	SAE			s_ALR48G [7510]	BASALT, PYROXENE-OLIVINE [7510]								PHYRIC [7510]	VOL				HE(CCMSTP/G) from OLIVINE [7510], HE3_HE4(R/R(A)) from OLIVINE [7510]	MIN [7510] / WR [11317]
[539]	OCEAN ISLAND	GOUGH CHAIN / GOUGH	30.5 M WEST OF DELL ROCKS	-40.32	-40.32	-9.92	-9.92	SAE			s_G30T [539]	GABBRO [539]								GRANULAR TO GABBROIC [539]	PLU					WR [539]	47.89	1.19		7.64		5.2	8.27		8.27	19.4	0.08		0.36	1.42	0.11		0.39	0.19
[539]	OCEAN ISLAND	GOUGH CHAIN / GOUGH	30.5 M WEST OF DELL ROCKS	-40.32	-40.32	-9.92	-9.92	SAE			s_G30S [539]	GABBRO [539]								GRANULAR TO GABBROIC [539]	PLU					WR [539]	52.42	0.68		18.57		1.45	3.63		11.33	8.09	0.13		0.45	3.3	0.05		0.06	0.07
[539]	OCEAN ISLAND	GOUGH CHAIN / GOUGH	THE GLEN	-40.32	-40.32	-9.92	-9.92	SAE			s_X15C1 [539]	GABBRO [539]								GRANULAR TO GABBROIC [539]	PLU					WR [539]	48.26	1.27		14.15		3.02	6.76		10.98	12.16	0.12		0.39	2.75	0.07		0.33	0.1
[539]	OCEAN ISLAND	GOUGH CHAIN / GOUGH	BEACH SOUTH OF LITTLE GLEN	-40.32	-40.32	-9.92	-9.92	SAE			s_X18E [539]	GABBRO [539]								GRANULAR TO GABBROIC [539]	PLU					WR [539]	46.24	3.42		11.95		4.11	6.65		11.69	12.01	0.11		0.39	2.22	0.13		0.69	0.46
[59]	OCEAN ISLAND	GOUGH CHAIN / GOUGH	SOPHERA GLEN	-40.32	-40.32	-9.92	-9.92	SAE			s_HC82196 [59]	GABBRO [59]									PLU				HE3_HE4(R/R(A)) from OLIVINE [59]	MIN [59]
[59]	OCEAN ISLAND	GOUGH CHAIN / GOUGH	SOPHERA GLEN	-40.32	-40.32	-9.92	-9.92	SAE			s_HC82056 [59]	GABBRO [59]									PLU				HE3_HE4(R/R(A)) from OLIVINE [59]	MIN [59]
[9391][482][15598][14579]	OCEAN ISLAND	GOUGH CHAIN / GOUGH		-40.32	-40.32	-9.92	-9.92	SAE			s_G 93 [9391] / s_G93 [482]	TRACHYBASALT [9391] / BASALT [482] / BASALT, ALKALINE [15598]									VOL					WR [9391]	47.2	3.47		13.5		1.75	8.93	10.5	7.46	8.73	0.14		2.63	2.74	0.78
[9391][24718][15598][14579]	OCEAN ISLAND	GOUGH CHAIN / GOUGH		-40.32	-40.32	-9.92	-9.92	SAE			s_G 117 [9391] / s_G117-TE4 [24718]	TRACHYBASALT [9391] / BASALT, ALKALINE [24718]									VOL					WR [9391]	46.7	3.76		15.8		1.76	8.98	10.6	7.94	4.52	0.15		2.31	2.78	0.69
[9391][15598][14579]	OCEAN ISLAND	GOUGH CHAIN / GOUGH		-40.32	-40.32	-9.92	-9.92	SAE			s_G 1 [9391]	BASALT [9391] / BASALT, ALKALINE [14579]									VOL					WR [9391]	47.4	2.92		12.8		1.75	8.93	10.5	8.24	9.81	0.14		1.79	2.62	0.49
[9391][24718][15598][14579]	OCEAN ISLAND	GOUGH CHAIN / GOUGH		-40.32	-40.32	-9.92	-9.92	SAE			s_G 6 [9391] / s_G6-TE2 [24718]	TRACHYBASALT [9391] / BASALT, ALKALINE [14579]									VOL					WR [9391]	47.6	3.36		13.4		1.72	8.76	10.3	7.81	7.94	0.12		2.32	2.69	0.74
[9391][15598][14579]	OCEAN ISLAND	GOUGH CHAIN / GOUGH		-40.32	-40.32	-9.92	-9.92	SAE			s_G 13 [9391]	TRACHYBASALT [9391] / BASALT, ALKALINE [15598]									VOL					WR [9391]	48	3.36		13.5		1.73	8.83	10.4	8.09	8.37	0.13		2.31	2.84	0.75
[9391][15598][14579]	OCEAN ISLAND	GOUGH CHAIN / GOUGH		-40.32	-40.32	-9.92	-9.92	SAE			s_G 14 [9391]	TRACHYBASALT [9391] / BASALT, ALKALINE [15598]									VOL					WR [9391]	49.1	3.1		13.6		1.64	8.34	9.82	7.55	8.01	0.13		2.54	3.12	0.74
[9391][15598][14579]	OCEAN ISLAND	GOUGH CHAIN / GOUGH		-40.32	-40.32	-9.92	-9.92	SAE			s_G 35 [9391]	BASALT [9391] / BASALT, ALKALINE [15598]									VOL					WR [9391]	48.5	3.33		13.4		1.9	9.7	11.4	7.71	8	0.14		1.67	2.64	0.58
[9391][15598][14579]	OCEAN ISLAND	GOUGH CHAIN / GOUGH		-40.32	-40.32	-9.92	-9.92	SAE			s_G 38 [9391]	BASALT [9391] / BASALT, ALKALINE [15598]									VOL					WR [9391]	43.7	3.28		15.2		1.99	10.1	11.9	6.75	6.56	0.12		0.84	2.48	0.31
[9391][15598][14579]	OCEAN ISLAND	GOUGH CHAIN / GOUGH		-40.32	-40.32	-9.92	-9.92	SAE			s_G 40 [9391]	TRACHYBASALT [9391] / BASALT, ALKALINE [15598]									VOL					WR [9391]	49.3	2.96		13.5		1.64	8.38	9.86	7.98	7.86	0.13		2.07	3.03	0.54
[9391][24718][15598][14579]	OCEAN ISLAND	GOUGH CHAIN / GOUGH		-40.32	-40.32	-9.92	-9.92	SAE			s_G 102 [9391] / s_G102-TE3 [24718]	BASANITE [9391] / BASALT, ALKALINE [24718]									VOL					WR [9391]	49.3	3.55		14.8		1.82	9.3	10.9	5.54	5.28	0.15		3.44	3.57	0.81
[9391][15598][14579]	OCEAN ISLAND	GOUGH CHAIN / GOUGH		-40.32	-40.32	-9.92	-9.92	SAE			s_G 110 [9391]	TRACHYBASALT [9391] / BASALT, ALKALINE [15598]									VOL					WR [9391]	48	3.27		13.8		1.69	8.62	10.1	7.8	7.9	0.13		2.44	2.9	0.76
[9391][15598][14579]	OCEAN ISLAND	GOUGH CHAIN / GOUGH		-40.32	-40.32	-9.92	-9.92	SAE			s_G 115 [9391]	BASALT [9391] / BASALT, ALKALINE [15598]									VOL					WR [9391]	45.2	2.48		10.3		2.03	10.3	12.2	7.68	15.5	0.16		1.48	1.81	0.33
[9391][15598][14579]	OCEAN ISLAND	GOUGH CHAIN / GOUGH		-40.32	-40.32	-9.92	-9.92	SAE			s_G 116 [9391]	TRACHYBASALT [9391] / BASALT, ALKALINE [15598]									VOL					WR [9391]	47.5	3.85		15.1		1.82	9.26	10.9	8.45	4.94	0.15		2.36	2.79	0.69
[9391][24718][15598][14579]	OCEAN ISLAND	GOUGH CHAIN / GOUGH		-40.32	-40.32	-9.92	-9.92	SAE			s_G 118 [9391] / s_G118-TE5 [24718]	BASALT [9391] / BASALT, ALKALINE [24718]									VOL					WR [9391]	46.7	2.75		11.4		1.82	9.3	10.9	8.47	13	0.15		1.76	2.04	0.48
[9391][15598][14579]	OCEAN ISLAND	GOUGH CHAIN / GOUGH		-40.32	-40.32	-9.92	-9.92	SAE			s_G 120 [9391]	TEPHRITE [9391] / BASALT, ALKALINE [15598]									VOL					WR [9391]	50.5	3.03		15.3		1.73	8.8	10.4	6.09	4.23	0.1		2.85	3.47	0.79
[9391][15598][14579]	OCEAN ISLAND	GOUGH CHAIN / GOUGH		-40.32	-40.32	-9.92	-9.92	SAE			s_G 131 [9391]	BASALT [9391] / BASALT, ALKALINE [15598]									VOL					WR [9391]	46.5	3.56		13.3		1.83	9.32	11	8.48	9.19	0.14		1.98	2.66	0.72
[9391][24718][15598][14579]	OCEAN ISLAND	GOUGH CHAIN / GOUGH		-40.32	-40.32	-9.92	-9.92	SAE			s_G 132 [9391] / s_G132-TE6 [24718]	TRACHYBASALT [9391] / BASALT, ALKALINE [24718]									VOL					WR [9391]	51.2	3.1		14.2		1.51	7.7	9.06	9.09	5.04	0.12		2.41	2.79	0.58
[9391][24718][15598][14579]	OCEAN ISLAND	GOUGH CHAIN / GOUGH		-40.32	-40.32	-9.92	-9.92	SAE			s_G 135 [9391] / s_G135-TE7 [24718]	TRACHYBASALT [9391] / BASALT, ALKALINE [24718]									VOL					WR [9391]	49.6	2.84		14.8		1.53	7.82	9.2	6.56	5.85	0.1		2.57	3.28	0.8
[9391][15598][14579]	OCEAN ISLAND	GOUGH CHAIN / GOUGH		-40.32	-40.32	-9.92	-9.92	SAE			s_G 136 [9391]	TRACHYBASALT [9391] / BASALT, ALKALINE [15598]									VOL					WR [9391]	49.7	2.93		15.1		1.59	8.13	9.56	6.8	5.51	0.12		2.65	3.37	0.77
[9391][15598][14579]	OCEAN ISLAND	GOUGH CHAIN / GOUGH		-40.32	-40.32	-9.92	-9.92	SAE			s_G 139 [9391]	BASALT [9391] / BASALT, ALKALINE [15598]									VOL					WR [9391]	46.2	3.67		14.6		1.67	8.5	10	8.47	6.82	0.15		2.7	2.17	0.75
[9391][15598][14579]	OCEAN ISLAND	GOUGH CHAIN / GOUGH		-40.32	-40.32	-9.92	-9.92	SAE			s_G 141 [9391]	TRACHYBASALT [9391] / BASALT, ALKALINE [15598]									VOL					WR [9391]	47	3.32		14.4		1.78	9.08	10.7	7.34	7.34	0.15		2.77	2.67	0.75
[9391][15598][14579]	OCEAN ISLAND	GOUGH CHAIN / GOUGH		-40.32	-40.32	-9.92	-9.92	SAE			s_G 142 [9391]	BASALT [9391] / BASALT, ALKALINE [15598]									VOL					WR [9391]	46.1	3.02		12.1		1.91	9.76	11.5	7.79	12.1	0.15		2.16	2.19	0.53
[9391][24718][15598][14579]	OCEAN ISLAND	GOUGH CHAIN / GOUGH		-40.32	-40.32	-9.92	-9.92	SAE			s_B 167 [9391] / s_B167-TE8 [24718]	TRACHYBASALT [9391] / BASALT, ALKALINE [24718]									VOL					WR [9391]	47.5	3.87		16.2		1.69	8.62	10.1	6.31	3.39	0.12		3.29	3.1	0.79
[582][580]	OCEAN ISLAND	GOUGH CHAIN / GOUGH	MOUTH OF DEEP GLEN	-40.32	-40.32	-9.92	-9.92	SAE			s_G121 [582] / s_G-121 [580]	BASALT, PICRITIC [582]									VOL					WR [582]	46.57	1.85		8.2		1.2	9.75		9.43	19.65	0.14		1.18	1.56	0.26		0.11	0.12				0.04
[582][580]	OCEAN ISLAND	GOUGH CHAIN / GOUGH	0.5 MILE UP THE GLEN STREAM	-40.32	-40.32	-9.92	-9.92	SAE			s_G13 [582] / s_G-13 [580]	BASALT, OLIVINE [582]									VOL					WR [582]	47.85	3.4		15.05		3.44	7.23		8	8.51	0.1		1.97	2.9	0.29		0.59	0.47
[582][580]	OCEAN ISLAND	GOUGH CHAIN / GOUGH	EDGE OF PLATEAU, HEAD OF DEEP GLEN	-40.32	-40.32	-9.92	-9.92	SAE			s_G164 [582] / s_G-164 [580]	TRACHYBASALT [582]									VOL					WR [582]	51.46	2.69		17.12		2.96	6.05		5.94	4.03	0.15		3.69	4.06	0.26		1.09	0.26
[582][580][581][1214]	OCEAN ISLAND	GOUGH CHAIN / GOUGH	WALL DIKE, THE GLEN	-40.32	-40.32	-9.92	-9.92	SAE			s_G15 [582] / s_G-15 [580]	TRACHYANDESITE [582] / ANDESITE [1214]								PORPHYRITIC [582]	VOL					WR [582]	55.8	1.87		18.41		3.07	3.78		5.07	2.13	0.09		4.3	4.57	0.23		0.34	0.26
[582][580]	OCEAN ISLAND	GOUGH CHAIN / GOUGH	0.75 MILE SOUTH OF SOUTH PEAK	-40.32	-40.32	-9.92	-9.92	SAE			s_G114 [582] / s_G-114 [580]	TRACHYTE [582]								VESICULAR [582]	VOL					WR [582]	58.17	1		19.31		1.98	3.45		1.84	1.05			6.55	5.05	0.36		0.84	0.5				0.07
[582][580]	OCEAN ISLAND	GOUGH CHAIN / GOUGH	0.25 MILE SOUTH EAST WATERFALL POINT	-40.32	-40.32	-9.92	-9.92	SAE			s_G16 [582] / s_G-16 [580]	TRACHYTE, AEGIRINE-AUGITE [582]									VOL					WR [582]	60.52	0.45		18.72		2.67	2.85		1.87	0.52	0.19		5.77	5.83	0.19		0.32	0.07
[582][580]	OCEAN ISLAND	GOUGH CHAIN / GOUGH / UPPER TRACHYTE UNIT	THE HAG^S TOOTH	-40.32	-40.32	-9.92	-9.92	SAE			s_G149 [582] / s_G-149 [580]	TRACHYTE, AEGIRINE-AUGITE [582]									VOL					WR [582]	62.45	0.38		17.92		2.06	3.11		1.17	0.09	0.16		6.14	6.47	0.09		0.16	0.27					0.03
[582][580][581]	OCEAN ISLAND	GOUGH CHAIN / GOUGH	0.25 MILE EAST NIGEL^S CAP	-40.32	-40.32	-9.92	-9.92	SAE			s_G19D [582] / s_G-19D [580]	TRACHYTE, AEGIRINE-AUGITE-SODALITE [582] / TRACHYTE, SODALITE [580]									VOL					WR [582]	60.17	0.15		18.45		3.32	2.53		1.44	0.04	0.23		5.43	7.52	0.04		0.31	0.3					0.38
[582][581]	OCEAN ISLAND	GOUGH CHAIN / GOUGH	THE GLEN STREAM	-40.32	-40.32	-9.92	-9.92	SAE	21	21	s_G132 [582] / s_G-132 [581]	BASALT, OLIVINE [582] / BASALT [581]									VOL					WR [582]	51.16	2.91		15.9		2.76	5.84		9.39	4.89	0.12		2.25	2.91	0.36		1.19	0.27
[582][581]	OCEAN ISLAND	GOUGH CHAIN / GOUGH	0.5 MILE NORTH-NORTH-WEST EDINBURGH PEAK	-40.32	-40.32	-9.92	-9.92	SAE			s_G3 [582] / s_G-3 [581]	TRACHYTE, AEGIRINE-AUGITE [582]									VOL					WR [582]	61.14	0.52		18.27		2.48	2.53		1.72	0.57	0.15		6	5.78	0.17		0.24	0.18
[582][581][1214]	OCEAN ISLAND	GOUGH CHAIN / GOUGH	0.25 MILE EAST EXPEDITION PEAK	-40.32	-40.32	-9.92	-9.92	SAE			s_G18 [582] / s_G-18 [581]	TRACHYTE, AEGIRINE-AUGITE [582] / TRACHYTE [1214]									VOL					WR [582]	60.9	0.37		18.76		1.3	3.67		1.66	0.23	0.21		6.03	6.3	0.1		0.25	0.07
[23083][11317]	OCEAN ISLAND	GOUGH CHAIN / GOUGH		-40.32	-40.32	-9.88	-9.88	SAE			s_ALR_8G [23083] / s_ALR8G [11317]	TRACHYBASALT [23083] / NOT GIVEN [11317]				QUATERNARY [23083]					VOL					WR [23083]	48.88	3.92		15.58				10.21	8.05	4.33	0.15		2.57	3.37	0.79
[23083][11317]	OCEAN ISLAND	GOUGH CHAIN / GOUGH		-40.3333	-40.3333	-9.9183	-9.9183	SAE			s_ALR_38G [23083] / s_ALR38G [11317]	BASALT [23083] / NOT GIVEN [11317]				QUATERNARY [23083]					VOL					WR [23083]	47.04	2.69		11.73				11.09	8.71	12.35	0.16		1.92	2.38	0.56
[23083][11317]	OCEAN ISLAND	GOUGH CHAIN / GOUGH		-40.32	-40.32	-9.925	-9.925	SAE			s_ALR_55G [23083] / s_ALR55G [11317]	BASALT [23083] / NOT GIVEN [11317]				QUATERNARY [23083]					VOL					WR [23083]	47.35	2.84		11.4				11.19	9.15	12.6	0.17		1.77	2.37	0.45
[482]	OCEAN ISLAND	GOUGH CHAIN / GOUGH		-40.32	-40.32	-9.92	-9.92	SAE			s_G64 [482]	BASALT [482]									VOL					WR [482]	49.65	3.85		15.65				9.97	7.96	3.22	0.14		3	3.34	0.77
[482]	OCEAN ISLAND	GOUGH CHAIN / GOUGH		-40.32	-40.32	-9.92	-9.92	SAE			s_G94 [482]	BASALT [482]									VOL					WR [482]	48.27	3.51		13.56				10.33	7.7	8.54	0.14		2.77	2.93	0.81
[582]	OCEAN ISLAND	GOUGH CHAIN / GOUGH	WEST SIDE OF ARCHWAY ROCK	-40.32	-40.32	-9.92	-9.92	SAE			s_G71 [582]	BASALT, OLIVINE [582]								PORPHYRITIC [582]	VOL					WR [582]	46.04	2.97		14.16		2.53	8.23		8.88	10.71	0.12		1.45	2.46	0.04		1.16	0.94				0.08	0.06
[582]	OCEAN ISLAND	GOUGH CHAIN / GOUGH	BOULDER BASE OF CLIFFS WEST OF BUTTRESS ROCK	-40.32	-40.32	-9.92	-9.92	SAE			s_G38 [582]	BASALT [582]								PORPHYRITIC [582]	VOL					WR [582]	46.72	3.29		16.36		3.43	7.63		7.92	7	0.13		1.29	2.73	0.08		2	1.15				0.01	0.09
[582]	OCEAN ISLAND	GOUGH CHAIN / GOUGH	WATERFALL POINT, UNDER TRACHYTE FLOWS	-40.32	-40.32	-9.92	-9.92	SAE			s_G97 [582]	TRACHYBASALT [582]								PORPHYRITIC [582]	VOL					WR [582]	48.89	3.07		16.15		1.53	8.15		7.58	7.25	0.13		2.61	3.35	0.15		0.42	0.44
[582]	OCEAN ISLAND	GOUGH CHAIN / GOUGH	NORTH SHOULDER OF MOUNT ROWETT	-40.32	-40.32	-9.92	-9.92	SAE			s_G50 [582]	TRACHYBASALT [582]								PORPHYRITIC [582]	VOL					WR [582]	45.9	3.25		17.25		7.62	4.32		7.63	5.06	0.16		2.5	2.8	0.39		1.87	1.58				0.07
[582]	OCEAN ISLAND	GOUGH CHAIN / GOUGH	BOULDER ON BEACH SOUTH OF BUTTRESS ROCK	-40.32	-40.32	-9.92	-9.92	SAE			s_X10 [582]	TRACHYBASALT [582]								PORPHYRITIC [582]	VOL					WR [582]	48.82	3.09		17.25		3.68	7.06		6.75	6.26	0.08		2.52	3.68	0.31		0.19	0.25				0.15
[582]	OCEAN ISLAND	GOUGH CHAIN / GOUGH	SUMMIT OF EDINBURGH PEAK	-40.32	-40.32	-9.92	-9.92	SAE			s_G2A [582]	TRACHYBASALT [582]								VESICULAR [582]	VOL					WR [582]	49.21	2.62		18.26		6.82	2.32		5.37	4.24	0.13		3.88	3.75	0.54		1.66	1
[582]	OCEAN ISLAND	GOUGH CHAIN / GOUGH	CLIFFS AT MOUTH OF THE GLEN	-40.32	-40.32	-9.92	-9.92	SAE			s_G29 [582]	TRACHYBASALT [582]									VOL					WR [582]	51.68	2.68		17.5		3.41	6.3		6.92	2.9	0.12		3.7	3.91	0.19		0.54	0.43
[582]	OCEAN ISLAND	GOUGH CHAIN / GOUGH	SELVAGE TO DIKE OPPOSITE TO THE GLEN STREAM	-40.32	-40.32	-9.92	-9.92	SAE			s_G4A [582]	TRACHYANDESITE [582]									VOL					WR [582]	55.89	1.6		16.9		1.41	6.71		4.48	2.26	0.13		4.58	4.44	0.34		0.99	0.26				0.04	0.04
[582]	OCEAN ISLAND	GOUGH CHAIN / GOUGH	BLOCK FROM TUFF, PENGUIN ISLAND	-40.32	-40.32	-9.92	-9.92	SAE			s_G86 [582]	TRACHYANDESITE [582]									VOL					WR [582]	54.41	1.67		17.37		4.02	3.29		4.36	2.27	0.12		4.69	4.94	0.46		0.86	1.5				0.13
[582]	OCEAN ISLAND	GOUGH CHAIN / GOUGH	THE GLEN STREAM	-40.32	-40.32	-9.92	-9.92	SAE	73	73	s_G11 [582]	TRACHYTE, BIOTITE [582]									VOL					WR [582]	57.54	1.22		18.76		4.54	1.56		2.42	1.08	0.25		5.66	5.01	0.15		0.89	0.54				0.21	0.07
[582]	OCEAN ISLAND	GOUGH CHAIN / GOUGH	1.25 MILES SOUTH WEST OF SOUTH PEAK	-40.32	-40.32	-9.92	-9.92	SAE			s_G107 [582]	TRACHYTE [582]								VESICULAR [582]	VOL					WR [582]	59.17	0.85		18.83		1.46	3.65		2.08	0.93	0.14		6.6	5.13	0.15		0.66	0.28
[582]	OCEAN ISLAND	GOUGH CHAIN / GOUGH	HEAD OF DEEP GLEN	-40.32	-40.32	-9.92	-9.92	SAE			s_G159 [582]	TRACHYTE, AEGIRINE-AUGITE-SODALITE [582]									VOL					WR [582]	60.48	0.3		18.02		2.46	2.76		1.86	0.26	0.26		5.7	6.71	0.07		0.9	0.26				0.05	0.17
[11317]	OCEAN ISLAND	GOUGH CHAIN / GOUGH / MIDDLE BASALTS		-40.32	-40.32	-9.92	-9.92	SAE			s_ALR5G [11317]	NOT GIVEN [11317]									VOL					WR [11317]
[11317]	OCEAN ISLAND	GOUGH CHAIN / GOUGH / MIDDLE BASALTS		-40.32	-40.32	-9.92	-9.92	SAE			s_ALR7G [11317]	NOT GIVEN [11317]									VOL					WR [11317]
[11317]	OCEAN ISLAND	GOUGH CHAIN / GOUGH / MIDDLE BASALTS		-40.32	-40.32	-9.92	-9.92	SAE			s_ALR14G [11317]	NOT GIVEN [11317]									VOL					WR [11317]
[11317]	OCEAN ISLAND	GOUGH CHAIN / GOUGH / MIDDLE BASALTS		-40.32	-40.32	-9.92	-9.92	SAE			s_ALR23G [11317]	NOT GIVEN [11317]									VOL					WR [11317]
[11317]	OCEAN ISLAND	GOUGH CHAIN / GOUGH / MIDDLE BASALTS		-40.32	-40.32	-9.92	-9.92	SAE			s_ALR24G [11317]	NOT GIVEN [11317]									VOL					WR [11317]
[11317]	OCEAN ISLAND	GOUGH CHAIN / GOUGH / MIDDLE BASALTS		-40.32	-40.32	-9.92	-9.92	SAE			s_ALR32G [11317]	NOT GIVEN [11317]									VOL					WR [11317]
[11317]	OCEAN ISLAND	GOUGH CHAIN / GOUGH / MIDDLE BASALTS		-40.32	-40.32	-9.92	-9.92	SAE			s_ALR33G [11317]	NOT GIVEN [11317]									VOL					WR [11317]
[11317]	OCEAN ISLAND	GOUGH CHAIN / GOUGH / MIDDLE BASALTS		-40.32	-40.32	-9.92	-9.92	SAE			s_ALR35G [11317]	NOT GIVEN [11317]									VOL					WR [11317]
[11317]	OCEAN ISLAND	GOUGH CHAIN / GOUGH / MIDDLE BASALTS		-40.32	-40.32	-9.92	-9.92	SAE			s_ALR36G [11317]	NOT GIVEN [11317]									VOL					WR [11317]
[11317]	OCEAN ISLAND	GOUGH CHAIN / GOUGH / MIDDLE BASALTS		-40.32	-40.32	-9.92	-9.92	SAE			s_ALR37G [11317]	NOT GIVEN [11317]									VOL					WR [11317]
[11317]	OCEAN ISLAND	GOUGH CHAIN / GOUGH / MIDDLE BASALTS		-40.32	-40.32	-9.92	-9.92	SAE			s_ALR43G [11317]	NOT GIVEN [11317]									VOL					WR [11317]
[11317]	OCEAN ISLAND	GOUGH CHAIN / GOUGH / MIDDLE BASALTS		-40.32	-40.32	-9.92	-9.92	SAE			s_ALR47G [11317]	NOT GIVEN [11317]									VOL					WR [11317]
[11317]	OCEAN ISLAND	GOUGH CHAIN / GOUGH / MIDDLE BASALTS		-40.32	-40.32	-9.92	-9.92	SAE			s_ALR54G [11317]	NOT GIVEN [11317]									VOL					WR [11317]
[11317]	OCEAN ISLAND	GOUGH CHAIN / GOUGH / MIDDLE BASALTS		-40.32	-40.32	-9.92	-9.92	SAE			s_ALR56G [11317]	NOT GIVEN [11317]									VOL					WR [11317]
[11317]	OCEAN ISLAND	GOUGH CHAIN / GOUGH / MIDDLE BASALTS		-40.32	-40.32	-9.92	-9.92	SAE			s_ALR63G [11317]	NOT GIVEN [11317]									VOL					WR [11317]
[11317]	OCEAN ISLAND	GOUGH CHAIN / GOUGH / MIDDLE BASALTS		-40.32	-40.32	-9.92	-9.92	SAE			s_ALR5G [11317]	NOT GIVEN [11317]									VOL					WR [11317]
[2582]	OCEAN ISLAND	GOUGH CHAIN / GOUGH		-40.32	-40.32	-9.92	-9.92	SAE			s_1 [2582]	NOT GIVEN [2582]									VOL					GL [2582]	61.22	0.42		18.01		1.32	4.51		1.88	0.44			5.93	6.49		0.46
[2582]	OCEAN ISLAND	GOUGH CHAIN / GOUGH		-40.32	-40.32	-9.92	-9.92	SAE			s_1 [2582]	TRACHYTE, ALKALINE [2582]									VOL					WR [2582]	63.84			18.46		1.54	1.79		2.45	0.78			3.08	7.25	0.24		0.39	0.1
[2582]	OCEAN ISLAND	GOUGH CHAIN / GOUGH / UPPER TRACHYTE UNIT	THE HAG^S TOOTH	-40.32	-40.32	-9.92	-9.92	SAE			s_2 [2582]	TRACHYTE, AEGIRINE-AUGITE [2582]									VOL					WR [2582]	62.4			18.37		1.83	2.64		2.3	0.65	0.17		4.05	7	0.07		0.37	0.12
[2582]	OCEAN ISLAND	GOUGH CHAIN / GOUGH		-40.32	-40.32	-9.92	-9.92	SAE			s_3 [2582]	TRACHYTE, AEGIRINE-AUGITE [2582]									VOL					WR [2582]	60.74	0.73		17.72		3.19	2.41		1.67	0.51	0.17		6.03	6.02			0.52	0.58
[2582]	OCEAN ISLAND	GOUGH CHAIN / GOUGH	DIKE AT SEA LEVEL, GLEN BEACH	-40.32	-40.32	-9.92	-9.92	SAE			s_1 [2582]	TRACHYBASALT [2582]									VOL					WR [2582]	55.8			17.53		1.24	5.87		5.77	2.52			2.98	7.28	0.79		0.12	0.2
[2582]	OCEAN ISLAND	GOUGH CHAIN / GOUGH	DIKE, DEVIL^S WALL	-40.32	-40.32	-9.92	-9.92	SAE			s_2 [2582]	TRACHYBASALT [2582]									VOL					WR [2582]	54.85	1.03		16.92		3.14	3.92		6.96	2.7			2.55	5.25	0.78		1.08	0.8
[2582]	OCEAN ISLAND	GOUGH CHAIN / GOUGH	SUMMIT OF MOUNT ROWETT	-40.32	-40.32	-9.92	-9.92	SAE			s_3 [2582]	TRACHYBASALT [2582]								PORPHYRITIC [2582]	VOL					WR [2582]	48.85	3.37		14.39		1.04	8.54		8.88	7.49	0.24		1.77	3.56	0.63		0.79	0.4
[2582]	OCEAN ISLAND	GOUGH CHAIN / GOUGH	DIKE AT SEA LEVEL, GLEN BEACH	-40.32	-40.32	-9.92	-9.92	SAE			s_4 [2582]	BASALT [2582]									VOL					WR [2582]	49.49	3.76		16.47		4.12	6		8.88	3.53	0.17		2.43	3.31			0.35	1.24					0.28
[2582]	OCEAN ISLAND	GOUGH CHAIN / GOUGH	SHORE INSIDE PENGUIN ISLAND	-40.32	-40.32	-9.92	-9.92	SAE			s_1 [2582]	BASALT, OLIVINE [2582]									VOL					WR [2582]	47.16	3.62		11.82		5.96	7.16		7.86	9.83	0.09		1.96	2.28	0.67		0.6	0.24
[2582]	OCEAN ISLAND	GOUGH CHAIN / GOUGH	SHORE INSIDE PENGUIN ISLAND	-40.32	-40.32	-9.92	-9.92	SAE			s_2 [2582]	BASALT, OLIVINE [2582]								PORPHYRITIC [2582]	VOL					WR [2582]	49.1	3.59		16.21		2.87	6.84		8.9	5.04	0.05		2.76	3.53	0.54		0.39	0.08
[2582]	OCEAN ISLAND	GOUGH CHAIN / GOUGH	SHORE INSIDE PENGUIN ISLAND	-40.32	-40.32	-9.92	-9.92	SAE			s_1A [2582]	TRACHYTE, OLIVINE [2582]									VOL					WR [2582]	60.66	0.4		18.54		2.25	2.26		1.34	0.51			6.08	5.99	0.28		0.97	0.55					0.08
[14234]	OCEAN ISLAND	GOUGH CHAIN / GOUGH	THE GLEN STREAM	-40.32	-40.32	-9.92	-9.92	SAE	73	73	s_G12 [14234]	BASALT [14234]	1000000 [14234]	1000000 [14234]							VOL					WR [14234]	49.79	3.16		14.5				10.01	7.67	7.4	0.14		2.76	3.09	0.77
[14234]	OCEAN ISLAND	GOUGH CHAIN / GOUGH	MILFORD BAY	-40.32	-40.32	-9.92	-9.92	SAE			s_G42 [14234]	NOT GIVEN [14234]		1000000 [14234]							VOL					WR [14234]	50.6	3.15		15.04				9.96	7.12	6.63	0.13		2.65	3.71	0.76
[14234]	OCEAN ISLAND	GOUGH CHAIN / GOUGH	KERN CRAG	-40.32	-40.32	-9.92	-9.92	SAE			s_G140 [14234]	BASALT [14234]	500000 [14234]	500000 [14234]							VOL					WR [14234]	46.76	2.86		11.67				11.64	8.58	12.88	0.16		1.88	2.22	0.56
[14234]	OCEAN ISLAND	GOUGH CHAIN / GOUGH	SOPHORA GLEN	-40.32	-40.32	-9.92	-9.92	SAE			s_G197 [14234]	BASALT [14234]	1000000 [14234]	1000000 [14234]							VOL					WR [14234]	51.07	3.01		15.21				9.76	7.25	6.45	0.12		2.7	3.61	0.9
[582][174][183][173][580][94][1214]	OCEAN ISLAND	GOUGH CHAIN / GOUGH	THE GLEN STREAM	-40.32	-40.32	-9.92	-9.92	SAE	73	73	s_G8 [582] / s_G-8 [174]	BASALT, OLIVINE [582] / BASALT [174]									VOL					WR [582]	51.05	2.55		16.79		3.85	5.26		8.97	4.3	0.12		2.37	3.26	0.34		0.84	0.66
[23083][11317][115]	OCEAN ISLAND	GOUGH CHAIN / GOUGH		-40.3333	-40.3333	-9.92	-9.92	SAE			s_ALR_41G [23083] / s_ALR41G [11317]	BASALT [23083] / NOT GIVEN [11317]				QUATERNARY [23083]					VOL				HE3_HE4(R/R(A)) from CLINOPYROXENE [115]	WR [23083] / MIN [115]	48.61	2.32		8.5				10.5	12.15	14.01	0.17		1.22	1.77	0.33
[528][115]	OCEAN ISLAND	GOUGH CHAIN / GOUGH / MIDDLE BASALTS		-40.32	-40.32	-9.92	-9.92	SAE			s_ALR26G [528]	BASALT, PICRITIC [528] / ANKARAMITE [115]								COARSELY PORPHYRITIC WITH A FINE- TO MEDIUM-GRAINED GROUNDMASS [528]	VOL				HE3_HE4(R/R(A)) from OLIVINE [115]	WR [528] / MIN [115]	45.45	2.4		10.06				11.92	8.15	17.44	0.17		1.78	1.97	0.46
[580]	OCEAN ISLAND	GOUGH CHAIN / GOUGH	0.25 MILE SOUTH EAST WATERFALL POINT	-40.32	-40.32	-9.92	-9.92	SAE			s_G16 [580]	TRACHYTE, AEGIRINE-AUGITE [580]									VOL					WR [580]
[528][11317]	OCEAN ISLAND	GOUGH CHAIN / GOUGH / MIDDLE BASALTS		-40.32	-40.32	-9.92	-9.92	SAE			s_ALR51G [528]	BASALT, PYROXENE-OLIVINE [528]								PHYRIC [528]	VOL					WR [528]	47.69	2.74		11.99				10.75	9.12	12.12	0.16		1.8	2.91	0.44
[528][23083][11317]	OCEAN ISLAND	GOUGH CHAIN / GOUGH		-40.3217	-40.3217	-9.925	-9.925	SAE			s_ALR52G [528] / s_ALR_52G [23083]	BASALT, PYROXENE-OLIVINE [528] / TRACHYBASALT [23083]				QUATERNARY [23083]				PHYRIC [528]	VOL					WR [528]	49.72	3.1		14.99				10.24	7.74	6.15	0.15		3.12	3.65	0.64
[528][23083][11317]	OCEAN ISLAND	GOUGH CHAIN / GOUGH		-40.3375	-40.3375	-9.8917	-9.8917	SAE			s_ALR6G [528] / s_ALR_6G [23083]	BASALT [528]				QUATERNARY [23083]				APHYRIC TO PORPHYRITIC [528]	VOL					WR [528]	49.68	3.25		15.09				10.57	9.59	6.07	0.15		1.92	2.93	0.55
[528]	OCEAN ISLAND	GOUGH CHAIN / GOUGH / TRACHYTIC SERIES		-40.32	-40.32	-9.92	-9.92	SAE			s_ALR58G [528]	TRACHYTE, AEGIRINE-AUGITE [528]								HIGHLY VESICULAR [528]	VOL					WR [528]	61.74	0.45		17.65				4.59	1.51	0.62	0.15		6.25	5.9	0.17
[528][11317]	OCEAN ISLAND	GOUGH CHAIN / GOUGH / MIDDLE BASALTS		-40.32	-40.32	-9.92	-9.92	SAE			s_ALR27G [528]	BASALT, PYROXENE-OLIVINE [528]								PHYRIC [528]	VOL					WR [528]	47.49	2.99		12.68				10.88	8.77	11.36	0.16		2.17	2.67	0.62
[528][11317]	OCEAN ISLAND	GOUGH CHAIN / GOUGH / MIDDLE BASALTS		-40.32	-40.32	-9.92	-9.92	SAE			s_ALR44G [528]	BASALT, PYROXENE-OLIVINE [528]								PHYRIC [528]	VOL					WR [528]	48.78	2.83		12.26				11.14	8.39	11	0.16		1.93	2.89	0.49
[582][1428][1214]	OCEAN ISLAND	GOUGH CHAIN / GOUGH / MIDDLE BASALTS	SOUTH SIDE OF ARCHWAY ROCK	-40.32	-40.32	-9.92	-9.92	SAE			s_G111 [582]	BASALT, OLIVINE [582] / BASALT, ALKALINE [1428]								PORPHYRITIC [582]	VOL					WR [582]	47.73	3.3		15.53		2.02	8.95		8.71	8.37	0.14		1.7	2.89	0.29		0.18	0.06
[582]	OCEAN ISLAND	GOUGH CHAIN / GOUGH / MIDDLE BASALTS	CLIFFS NORTH OF THE GLEN BEACH	-40.32	-40.32	-9.92	-9.92	SAE			s_G22 [582]	TRACHYBASALT [582]									VOL					WR [582]	48.79	3.18		17.39		2.48	7.39		8.97	4	0.1		2.28	3.28	0.26		0.98	0.76
[23083]	OCEAN ISLAND	GOUGH CHAIN / GOUGH		-40.335	-40.335	-9.88	-9.88	SAE			s_ALR_34G [23083]	TRACHYANDESITE, BASALTIC [23083]				QUATERNARY [23083]					VOL					WR [23083]	51.09	2.38		17.93				7.56	6.13	3.12	0.13		3.98	4.7	1.16
[528][11317]	OCEAN ISLAND	GOUGH CHAIN / GOUGH / MIDDLE BASALTS		-40.32	-40.32	-9.92	-9.92	SAE			s_ALR49G [528]	BASALT, PYROXENE-OLIVINE [528]								PHYRIC [528]	VOL					WR [528]	51	2.88		15.44				9.88	7.12	5.33	0.15		3.35	4	0.9
[528]	OCEAN ISLAND	GOUGH CHAIN / GOUGH		-40.32	-40.32	-9.92	-9.92	SAE			s_ALR32G [528]	BASALT, PICRITIC [528]									VOL					WR [528]	50.7	3.11		14.63				9.77	7.33	7.23	0.13		2.68	4.01	0.8
[528]	OCEAN ISLAND	GOUGH CHAIN / GOUGH / MIDDLE BASALTS		-40.32	-40.32	-9.92	-9.92	SAE			s_ALR39G [528]	BASALT, PYROXENE-OLIVINE [528]								PHYRIC [528]	VOL					WR [528]	48.26	2.93		12.7				10.39	8.51	10.69	0.15		2.16	3.03	0.53
[528][23083][11317]	OCEAN ISLAND	GOUGH CHAIN / GOUGH		-40.3333	-40.3333	-9.92	-9.92	SAE			s_ALR40G [528] / s_ALR_40G [23083]	BASALT, PYROXENE-OLIVINE [528] / BASALT [23083]				QUATERNARY [23083]				PHYRIC [528]	VOL					WR [528]	48.54	2.59		11.14				10.93	9.42	12.25	0.16		1.62	2.78	0.46
[528]	OCEAN ISLAND	GOUGH CHAIN / GOUGH / MIDDLE BASALTS		-40.32	-40.32	-9.92	-9.92	SAE			s_ALR42G [528]	BASALT, PYROXENE-OLIVINE [528]								PHYRIC [528]	VOL					WR [528]	48.7	3.1		12.52				11.71	7.18	10.28	0.16		2.18	3.29	0.57
[528][7510][11317]	OCEAN ISLAND	GOUGH CHAIN / GOUGH / MIDDLE BASALTS		-40.32	-40.32	-9.92	-9.92	SAE			s_ALR10G [528]	BASALT, PYROXENE-OLIVINE [528]								PHYRIC [528]	VOL				HE(CCMSTP/G) from OLIVINE [7510], HE3_HE4(R/R(A)) from OLIVINE [7510]	WR [528] / MIN [7510]	49.34	3		14.18				10.09	9	8.1	0.14		2.13	3.33	0.56
[528][23083][11317]	OCEAN ISLAND	GOUGH CHAIN / GOUGH		-40.3333	-40.3333	-9.92	-9.92	SAE			s_ALR45G [528] / s_ALR_45G [23083]	BASALT, PYROXENE-OLIVINE [528] / TRACHYBASALT [23083]				QUATERNARY [23083]				PHYRIC [528]	VOL					WR [528]	48.54	3.22		14.37				10.74	7.94	7.5	0.15		2.23	3.05	0.6
[528][11317]	OCEAN ISLAND	GOUGH CHAIN / GOUGH / MIDDLE BASALTS		-40.32	-40.32	-9.92	-9.92	SAE			s_ALR50G [528]	BASALT, PYROXENE-OLIVINE [528]								PHYRIC [528]	VOL					WR [528]	49.92	2.98		15.27				10.15	8.62	7.04	0.15		2.19	3.45	0.59
[528][23083][11317]	OCEAN ISLAND	GOUGH CHAIN / GOUGH		-40.32	-40.32	-9.925	-9.925	SAE			s_ALR64G [528] / s_ALR_64G [23083]	BASALT, PYROXENE-OLIVINE [528] / TRACHYBASALT [23083]				QUATERNARY [23083]				PHYRIC [528]	VOL					WR [528]	50.33	3		15.05				9.76	8.34	6.65	0.14		2.63	3.6	0.64
[528][11317]	OCEAN ISLAND	GOUGH CHAIN / GOUGH / MIDDLE BASALTS		-40.32	-40.32	-9.92	-9.92	SAE			s_ALR12G [528]	BASALT [528]								APHYRIC TO PORPHYRITIC [528]	VOL					WR [528]	48.22	3.28		15.78				10.19	9.99	6.42	0.15		1.64	3.03	0.53
[528][23083][11317]	OCEAN ISLAND	GOUGH CHAIN / GOUGH		-40.32	-40.32	-9.88	-9.88	SAE			s_ALR13G [528] / s_ALR_13G [23083]	BASALT [528] / TRACHYBASALT [23083]				QUATERNARY [23083]				APHYRIC TO PORPHYRITIC [528]	VOL					WR [528]	50.44	3.27		15.55				9.65	8.79	5.27	0.14		2.54	3.47	0.65
[528][11317]	OCEAN ISLAND	GOUGH CHAIN / GOUGH / MIDDLE BASALTS		-40.32	-40.32	-9.92	-9.92	SAE			s_ALR53G [528]	BASALT [528]								APHYRIC TO PORPHYRITIC [528]	VOL					WR [528]	51.38	3.26		16.25				9.89	6.81	3.73	0.14		3.5	3.92	0.8
[528][11317]	OCEAN ISLAND	GOUGH CHAIN / GOUGH / MIDDLE BASALTS		-40.32	-40.32	-9.92	-9.92	SAE			s_ALR9G [528]	BASALT, THOLEIITIC [528]									VOL					WR [528]	49.93	3.26		15.44				9.71	8.72	5.87	0.14		2.42	3.24	0.62
[528]	OCEAN ISLAND	GOUGH CHAIN / GOUGH / MIDDLE BASALTS		-40.32	-40.32	-9.92	-9.92	SAE			s_ALR25G [528]	BASALT, THOLEIITIC [528]									VOL					WR [528]	50.35	3.08		14.31				10.17	9.17	7.1	0.14		2.11	3.24	0.56
[528][11317]	OCEAN ISLAND	GOUGH CHAIN / GOUGH / MIDDLE BASALTS		-40.32	-40.32	-9.92	-9.92	SAE			s_ALR30G [528]	BASALT, THOLEIITIC [528]									VOL					WR [528]	51.36	2.62		16.13				8.93	6.27	5	0.12		3.26	3.3	0.79
[528]	OCEAN ISLAND	GOUGH CHAIN / GOUGH / TRACHYTIC SERIES		-40.32	-40.32	-9.92	-9.92	SAE			s_ALR21G [528]	TRACHYTE [528]									VOL					WR [528]	60.55	0.8		18.11				4.79	2	0.91	0.14		6.58	5.64	0.32
[528]	OCEAN ISLAND	GOUGH CHAIN / GOUGH / TRACHYTIC SERIES		-40.32	-40.32	-9.92	-9.92	SAE			s_ALR22G [528]	TRACHYTE [528]									VOL					WR [528]	60.55	0.8		18.11				4.79	2	0.91	0.14		6.58	5.64	0.32
[23083][11317]	OCEAN ISLAND	GOUGH CHAIN / GOUGH		-40.3333	-40.3333	-9.92	-9.92	SAE			s_ALR_46G [23083] / s_ALR46G [11317]	BASALT [23083] / NOT GIVEN [11317]				QUATERNARY [23083]					VOL					WR [23083]	48.21	2.82		11.56				11.21	8.86	11.48	0.17		1.8	2.48	0.49
[582][581][1214]	OCEAN ISLAND	GOUGH CHAIN / GOUGH	NORTH SLOPES OF THE GLEN	-40.32	-40.32	-9.92	-9.92	SAE	46	46	s_G95 [582] / s_G-95 [581]	TRACHYBASALT [582]								PORPHYRITIC [582]	VOL					WR [582]	52.01	2.11		18.76		2.46	5.99		6.6	3.11	0.05		3.38	4.34	0.44		0.34	0.14				0.16
[540][582][1308]	OCEAN ISLAND	GOUGH CHAIN / GOUGH	MOUTH OF THE GLEN, DIKE	-40.32	-40.32	-9.92	-9.92	SAE			s_G-24 [540] / s_G24 [582]	TRACHYTE, BIOTITE [540]									VOL					WR [540]	60.09	0.93		17.95		1.39	3.36		2.43	0.96	0.12		6.51	5.69	0.29		0.32	0.09					0.02
Abbreviations: MET: METAMORPHIC ROCK; PEG: PEGMATITE; PER: MANTLE XENOLITH; PLU: PLUTONIC ROCK; SED: SEDIMENTARY ROCK; VOL: VOLCANIC ROCK; VEIN: VEIN; ORE: ORE; WR: WHOLE ROCK; GL: VOLCANIC GLASS; MIN: MINERAL / COMPONENT (INCL. GROUNDMASS); INC: INCLUSION; LEACH: LEACH; SAE: SUBAERIAL; SAQ: SUBAQUATIC; F: FRESH; E: EXTENSIVELY ALTERED; M: MODERATELY ALTERED; S: SLIGHTLY ALTERED; T: ALMOST TOTALL…
References:
[59] VANCE D., STONE J. O. H., O^NIONS R. K.: HE, SR AND ND ISOTOPES IN XENOLITHS FROM HAWAII AND OTHER OCEANIC ISLANDS EARTH PLANET. SCI. LETT. 96 [1989] 147-160 doi: 10.1016/0012-821X(89)90129-5
[94] WHITE W. M., HOFMANN A. W.: SR AND ND ISOTOPE GEOCHEMISTRY OF OCEANIC BASALTS AND MANTLE EVOLUTION NATURE 296 [1982] 821-825 doi: 10.1038/296821a0
[103] ROY-BARMAN M., ALLEGRE C.-J.: 187OS/186OS IN OCEANIC ISLAND BASALTS: TRACING OCEANIC CRUST RECYCLING IN THE MANTLE EARTH PLANET. SCI. LETT. 129 [1995] 145-161 doi: 10.1016/0012-821X(94)00238-T
[115] KURZ M. D., JENKINS W. J., HART S. R.: HELIUM ISOTOPIC SYSTEMATICS OF OCEANIC ISLANDS AND MANTLE HETEROGENEITY NATURE 297 [1982] 43-47 doi: 10.1038/297043a0
[173] JOCHUM K. P., HOFMANN A. W.: CONSTRAINTS ON EARTH EVOLUTION FROM ANTIMONY IN MANTLE-DERIVED ROCKS CHEM. GEOL. 139 [1997] 39-49 GeoReM-id: 65 doi: 10.1016/S0009-2541(97)00032-6
[174] JOCHUM K. P., HOFMANN A. W., SEUFERT H. M.: TIN IN MANTLE-DERIVED ROCKS: CONSTRAINTS ON EARTH EVOLUTION GEOCHIM. COSMOCHIM. ACTA 57 [1993] 3585-3595 GeoReM-id: 69 doi: 10.1016/0016-7037(93)90141-I
[183] HOFMANN A. W., JOCHUM K. P., SEUFERT H. M., WHITE W. M.: NB AND PB IN OCEANIC BASALTS: NEW CONSTRAINTS ON MANTLE EVOLUTION EARTH PLANET. SCI. LETT. 79 [1986] 33-45 doi: 10.1016/0012-821X(86)90038-5
[482] WEAVER B. L., WOOD D. A., TARNEY J., JORON J.-L.: GEOCHEMISTRY OF OCEAN ISLAND BASALTS FROM THE SOUTH ATLANTIC, ASCENSION, BOUVET, ST. HELENA, GOUGH AND TRISTAN DA CUNHA SPEC. PUBL. GEOL. SOC. LONDON 30 [1987] 253-267 doi: 10.1144/GSL.SP.1987.030.01.11
[528] LE ROEX A. P.: GEOCHEMISTRY, MINERALOGY, AND MAGMATIC EVOLUTION OF THE BASALTIC AND TRACHYTIC LAVAS FROM GOUGH ISLAND, SOUTH ATLANTIC J. PETROL. 26 [1985] 149-186 doi: 10.1093/petrology/26.1.149
[539] LE MAITRE R. W.: THE SIGNIFICANCE OF THE GABBROIC XENOLITHS FROM GOUGH ISLAND, SOUTH ATLANTIC MINERAL. MAG. 34 [1965] 303-317 doi: 10.1180/minmag.1965.034.268.26
[540] CARMICHAEL I. S. E.: TRACHYTES AND THEIR FELDSPAR PHENOCRYSTS MINERAL. MAG. 34 [1965] 107-125 doi: 10.1180/minmag.1965.034.268.09
[580] ZIELINSKI R. A., FREY F. A.: GOUGH ISLAND, EVALUATION OF A FRACTIONAL CRYSTALLIZATION MODEL CONTRIB. MINERAL. PETROL. 29 [1970] 242-254 doi: 10.1007/BF00373308
[581] GAST P. W., TILTON G. R., HEDGE C. E.: ISOTOPIC COMPOSITION OF LEAD AND STRONTIUM FROM ASCENSION AND GOUGH ISLANDS SCIENCE 145 [1964] 1181-1185 doi: 10.1126/science.145.3637.1181
[582] LE MAITRE R. W.: PETROLOGY OF VOLCANIC ROCKS, GOUGH ISLAND, SOUTH ATLANTIC BULL. GEOL. SOC. AM. 73 [1962] 1309-1340 doi: 10.1130/0016-7606(1962)73[1309:POVRGI]2.0.CO;2
[1214] SUN SHEN-SU: LEAD ISOTOPIC STUDY OF YOUNG VOLCANIC ROCKS FROM MID-OCEAN RIDGES, OCEAN ISLANDS AND ISLAND ARCS PHIL. TRANS. ROY. SOC. LONDON A297 [1980] 409-445 doi: 10.1098/rsta.1980.0224
[1308] BERLIN R., HENDERSON C. M. B.: THE DISTRIBUTION OF SR AND BA BETWEEN THE ALKALI FELDSPAR, PLAGIOCLASE AND GROUNDMASS PHASES OF PORPHYRITIC TRACHYTES AND PHONOLITES GEOCHIM. COSMOCHIM. ACTA 33 [1969] 247-255 doi: 10.1016/0016-7037(69)90141-0
[1428] SUN SHEN-SU, HANSON G. N.: ORIGIN OF ROSS ISLAND BASANITOIDS AND LIMITATIONS UPON THE HETEROGENEITY OF MANTLE SOURCES FOR ALKALI BASALTS AND NEPHELINITES CONTRIB. MINERAL. PETROL. 52 [1975] 77-106 doi: 10.1007/BF00395006
[2582] MITCHELL-THOME R. C.: GEOLOGY OF THE SOUTH ATLANTIC ISLANDS [1970] 1-350
[5216] DAVID K., SCHIANO P., ALLEGRE C.-J.: ASSESSMENT OF THE ZR/HF FRACTIONATION IN OCEANIC BASALTS AND CONTINENTAL MATERIALS DURING PETROGENETIC PROCESSES EARTH PLANET. SCI. LETT. 178 [2000] 285-301 doi: 10.1016/S0012-821X(00)00088-1
[7510] CLASS C., GOLDSTEIN S. L., STUTE M., KURZ M. D., SCHLOSSER P.: GRAND COMORE ISLAND: A WELL-CONSTRAINED ^LOW 3HE/4HE^ MANTLE PLUME EARTH PLANET. SCI. LETT. 233 [2005] 391-409 doi: 10.1016/j.epsl.2005.02.029
[9391] WILLBOLD M., STRACKE A.: TRACE ELEMENT COMPOSITION OF MANTLE END-MEMBERS: IMPLICATIONS FOR RECYCLING OF OCEANIC AND UPPER AND LOWER CONTINENTAL CRUST GEOCHEMISTRY GEOPHYSICS GEOSYSTEMS 7 [2006] GeoReM-id: 998 doi: 10.1029/2005GC001005
[11317] CLASS C., LE ROEX A. P.: CE ANOMALIES IN GOUGH ISLAND LAVAS - TRACE ELEMENT CHARACTERISTICS OF A RECYCLED SEDIMENT COMPONENT EARTH PLANET. SCI. LETT. 265 [2008] 475-486 GeoReM-id: 3995 doi: 10.1016/j.epsl.2007.10.030
[14234] GIBSON S. A., THOMPSON R. N., DAY J. A., HUMPHRIS S. E., DICKIN A. P.: MELT-GENERATION PROCESSES ASSOCIATED WITH THE TRISTAN MANTLE PLUME: CONSTRAINTS ON THE ORIGIN OF EM-1 EARTH PLANET. SCI. LETT. 237 [2005] 744-767 doi: 10.1016/j.epsl.2005.06.015
[14579] WILLBOLD M., STRACKE A.: FORMATION OF ENRICHED MANTLE COMPONENTS BY RECYCLING OF UPPER AND LOWER CONTINENTAL CRUST CHEM. GEOL. 276 [2010] 188-197 doi: 10.1016/j.chemgeo.2010.06.005
[15598] SALTERS V. J. M., MALLICK S., HART S. R., LANGMUIR C. H., STRACKE A.: DOMAINS OF DEPLETED MANTLE: NEW EVIDENCE FROM HAFNIUM AND NEODYMIUM ISOTOPES GEOCHEMISTRY GEOPHYSICS GEOSYSTEMS 12 [2011] GeoReM-id: 6231 doi: 10.1029/2011GC003617
[23083] BOYET M., DOUCELANCE R., ISRAEL C., BONNAND P., AUCLAIR D., SUCHORSKI K., BOSQ C.: NEW CONSTRAINTS ON THE ORIGIN OF THE EM-1 COMPONENT REVEALED BY THE MEASUREMENT OF THE LA-CE ISOTOPE SYSTEMATICS IN GOUGH ISLAND LAVAS GEOCHEMISTRY GEOPHYSICS GEOSYSTEMS 20 [2019] 2484-2498 GeoReM-id: 11825 doi: 10.1029/2019GC008228
[24718] BRETT E. K. A., PRYTULAK J., REHKƒMPER M., HAMMOND S. J., CHAUVEL C., STRACKE A., WILLBOLD M.: THALLIUM ELEMENTAL AND ISOTOPIC SYSTEMATICS IN OCEAN ISLAND LAVAS GEOCHIM. COSMOCHIM. ACTA 301 [2021] 187-210 doi: 10.1016/j.gca.2021.02.035
[truncated: 121 more columns]

## Sheet: Kerguelen
CITATIONS	TECTONIC SETTING	LOCATION	LOCATION COMMENT	LATITUDE MIN	LATITUDE MAX	LONGITUDE MIN	LONGITUDE MAX	LAND OR SEA	ELEVATION MIN	ELEVATION MAX	SAMPLE NAME	ROCK NAME	MIN. AGE (YRS.)	MAX. AGE (YRS.)	GEOL.	AGE	ERUPTION DAY	ERUPTION MONTH	ERUPTION YEAR	ROCK TEXTURE	ROCK TYPE	DRILL DEPTH MIN	DRILL DEPTHAX	ALTERATION	MINERAL	MATERIAL	SIO2(WT%)	TIO2(WT%)	B2O3(WT%)	AL2O3(WT%)	CR2O3(WT%)	FE2O3(WT%)	FEO(WT%)	FEOT(WT%)	CAO(WT%)	MGO(WT%)	MNO(WT%)	NIO(WT%)	K2O(WT%)	NA2O(WT%)	P2O5(WT%)	H2O(WT%)	H2OP(WT%)	H2OM(WT%)	H2OT(WT%)	CO2(WT%)	CO1(WT%)	F(WT%)	CL(WT%)
[459]	OCEAN ISLAND	KERGUELEN / FOCH / MOUNT BUREAU		-48.55	-49.75	68.5	70.58	SAE			s_KG4-1 [459]	BASALT [459]	26000000 [459]	26000000 [459]							VOL					WR [459]
[459]	OCEAN ISLAND	KERGUELEN / KERGUELEN ARCHIPELAGO		-48.55	-49.75	68.5	70.58	SAE			s_KG11-1 [459]	BASALT [459]	26000000 [459]	26000000 [459]							VOL					WR [459]
[1008]	OCEAN ISLAND	KERGUELEN / KERGUELEN ARCHIPELAGO / MOUNT ROUGE	RONARC^H PENINSULA, VALLEE PHONOLITE, WEST FLANK OF MOUNT ROUGE	-48.55	-49.75	68.5	70.58	SAE	105	105	s_LVLK87 [1008]	BASALT, ALKALINE [1008]									VOL					WR [1008]	46.96	3.93		15.89		5.42	7.98		8.41	5.37	0.18		1.33	3.16	0.39
[1008][5176]	OCEAN ISLAND	KERGUELEN / KERGUELEN ARCHIPELAGO	JEANNE D^ARC PENINSULA, NORTHEAST FLANK OF LES 3 FRERES	-48.55	-49.75	68.5	70.58	SAE	640	640	s_LVLK123 [1008]	BASALT, ALKALINE [1008] / BASALT [5176]	24800000 [5176]	24800000 [5176]	LOWER [5176]	MIOCENE [5176]					VOL					WR [1008]	48.96	3.05		14.95		4.06	8.07		10.01	4.89	0.18		1.19	3.13	0.37
[1008]	OCEAN ISLAND	KERGUELEN / GABY ISLAND	SOUTH SUMMIT	-48.55	-49.75	68.5	70.58	SAE	640	640	s_LVLK130 [1008]	BASALT, ALKALINE [1008]									VOL					WR [1008]	49.65	2.75		16.68		4.42	6.37		10.18	4.33	0.16		1.23	3.12	0.39
[1008][5176]	OCEAN ISLAND	KERGUELEN / GABY ISLAND	EXTRUSION AT THE SOUTH SUMMIT	-48.55	-49.75	68.5	70.58	SAE	535	535	s_LVLK131 [1008]	TRACHYTE, QUARTZ [1008] / TRACHYTE [5176]	24800000 [5176]	24800000 [5176]	LOWER [5176]	MIOCENE [5176]					VOL					WR [1008]	62.59	0.52		15.67		3.55	3.69		2.84	0.24	0.24		4.82	5.25	0.11
[1006][1008][5176]	OCEAN ISLAND	KERGUELEN / KERGUELEN ARCHIPELAGO / MOUNT THOMPSON	RONARC^H PENINSULA, SOUTH FLANK OF MOUNT THOMPSON	-48.55	-49.75	68.5	70.58	SAE	580	580	s_ARC156 [1006]	BASANITE [1006]	10000000 [5176]	10000000 [5176]	UPPER [1006]	MIOCENE [1006]					VOL					WR [1006]	42.89	3.21		11.33				11.81	10.3	10.58	0.19		2.33	3.58	1.04
[1008][5176]	OCEAN ISLAND	KERGUELEN / KERGUELEN ARCHIPELAGO	RONARC^H PENINSULA, SADDLE BETWEEN LA TOUR DE PISE AND MOUNT THOMPSON	-48.55	-49.75	68.5	70.58	SAE	540	540	s_ARC321 [1008]	BASANITE [1008]	10000000 [5176]	10000000 [5176]	UPPER [5176]	MIOCENE [5176]					VOL					WR [1008]	43.52	4.11		14.72				12.55	9.4	5.8	0.2		3.57	3.17	1.88
[1008][5176]	OCEAN ISLAND	KERGUELEN / KERGUELEN ARCHIPELAGO	RONARC^H PENINSULA, SOUTHERN FLANK OF LA TOUR DE PISE	-48.55	-49.75	68.5	70.58	SAE	250	250	s_LVLK81 [1008]	PHONOLITE [1008]	10000000 [5176]	10000000 [5176]	UPPER [5176]	MIOCENE [5176]					VOL					WR [1008]	56.32	0.31		22.1		2.01	0.93		1.04	0.17	0.15		6.04	10.68	0.05
[5216]	OCEAN ISLAND	KERGUELEN / KERGUELEN ARCHIPELAGO		-48.55	-49.75	68.5	70.58	SAE			s_KER-15223 [5216]	BASALT [5216]									VOL					WR [5216]	44.58	1.92		13.88		12.21	8.77		9.4	7.99	0.17		1.29	1.84	0.42
[5177]	OCEAN ISLAND	KERGUELEN / KERGUELEN ARCHIPELAGO / MONT DES RUCHES	LORANCHET PENINSULA	-48.87	-48.87	68.96	68.96	SAE	490	490	s_BY96-25 [5177]	BASALT [5177]								OLIVINE PHYRIC, SUBOPHITIC GROUNDMASS [5177]	VOL			S		WR [5177]	46.86	1.87		14.34				11.62	9.87	10.64	0.19		0.84	2.06	0.26
[5177]	OCEAN ISLAND	KERGUELEN / KERGUELEN ARCHIPELAGO / MONT DES RUCHES	LORANCHET PENINSULA	-48.87	-48.87	68.96	68.96	SAE	480	480	s_BY96-26 [5177]	BASALT [5177]								OLIVINE PHYRIC, DOLERITIC GROUNDMASS [5177]	VOL			F		WR [5177]	47.13	2.13		15.35				11.28	10.78	7.8	0.17		0.79	2.25	0.31
[5177]	OCEAN ISLAND	KERGUELEN / KERGUELEN ARCHIPELAGO / MONT DES RUCHES	LORANCHET PENINSULA	-48.87	-48.87	68.96	68.96	SAE	442	442	s_BY96-29 [5177]	BASALT [5177]								OLIVINE PHYRIC, DOLERITIC GROUNDMASS [5177]	VOL			S		WR [5177]	46.66	1.88		13.96				11.62	10.23	11.54	0.19		0.67	1.76	0.29
[5177]	OCEAN ISLAND	KERGUELEN / KERGUELEN ARCHIPELAGO / MONT DES RUCHES	LORANCHET PENINSULA	-48.87	-48.87	68.96	68.96	SAE	412	412	s_BY96-30 [5177]	BASALT [5177]								OLIVINE PHYRIC, DOLERITIC GROUNDMASS [5177]	VOL			S		WR [5177]	47.08	1.22		14.83				11.25	10.66	10.19	0.19		0.61	2.09	0.16
[5177]	OCEAN ISLAND	KERGUELEN / KERGUELEN ARCHIPELAGO / MONT DES RUCHES	LORANCHET PENINSULA	-48.87	-48.87	68.96	68.96	SAE	380	380	s_BY96-32 [5177]	BASALT [5177]								OLIVINE PHYRIC, DOLERITIC GROUNDMASS [5177]	VOL			S		WR [5177]	46.88	1.79		14.23				11.3	9.55	11.69	0.18		0.72	2.33	0.26
[5177]	OCEAN ISLAND	KERGUELEN / KERGUELEN ARCHIPELAGO / MONT DES RUCHES	LORANCHET PENINSULA	-48.87	-48.87	68.96	68.96	SAE	350	350	s_BY96-33 [5177]	BASALT [5177]								OLIVINE PHYRIC, DOLERITIC GROUNDMASS [5177]	VOL			F		WR [5177]	47.25	2.02		15.36				10.6	10.7	9.63	0.18		1.03	1.79	0.33
[5177]	OCEAN ISLAND	KERGUELEN / KERGUELEN ARCHIPELAGO / MONT DES RUCHES	LORANCHET PENINSULA	-48.87	-48.87	68.96	68.96	SAE	308	308	s_BY96-35 [5177]	BASALT [5177]								OLIVINE PHYRIC, SUBOPHITIC GROUNDMASS [5177]	VOL			F		WR [5177]	48.31	1.68		14.94				11.93	11.65	7.06	0.2		0.59	2.27	0.21
[5177]	OCEAN ISLAND	KERGUELEN / KERGUELEN ARCHIPELAGO / MONT DES RUCHES	LORANCHET PENINSULA	-48.87	-48.87	68.96	68.96	SAE	300	300	s_BY96-36 [5177]	BASALT [5177]								OLIVINE PHYRIC, DOLERITIC GROUNDMASS [5177]	VOL			F		WR [5177]	46.83	1.65		14.48				12.14	10.79	8.91	0.2		0.6	2.31	0.23
[5177]	OCEAN ISLAND	KERGUELEN / KERGUELEN ARCHIPELAGO / MONT DES RUCHES	LORANCHET PENINSULA	-48.87	-48.87	68.96	68.96	SAE	263	263	s_BY96-37 [5177]	BASALT [5177]								OLIVINE PHYRIC, DOLERITIC GROUNDMASS [5177]	VOL			F		WR [5177]	47.65	2.39		14.47				13.84	10.58	6.64	0.21		0.42	2.27	0.22
[5177]	OCEAN ISLAND	KERGUELEN / KERGUELEN ARCHIPELAGO / MONT DES RUCHES	LORANCHET PENINSULA	-48.87	-48.87	68.96	68.96	SAE	230	230	s_BY96-38 [5177]	BASALT [5177]								OLIVINE PHYRIC, SUBOPHITIC GROUNDMASS [5177]	VOL			F		WR [5177]	49.04	1.52		13.84				11.89	9.62	9.98	0.19		0.38	2.15	0.18
[5177]	OCEAN ISLAND	KERGUELEN / KERGUELEN ARCHIPELAGO / MONT DES RUCHES	LORANCHET PENINSULA	-48.87	-48.87	68.96	68.96	SAE	180	180	s_BY96-39 [5177]	BASALT [5177]								OLIVINE PHYRIC, SUBOPHITIC GROUNDMASS [5177]	VOL			E		WR [5177]	47.08	1.25		15.23				11.19	10.38	10.22	0.18		0.09	1.93	0.11
[5177]	OCEAN ISLAND	KERGUELEN / KERGUELEN ARCHIPELAGO / MONT DES RUCHES	LORANCHET PENINSULA	-48.87	-48.87	68.96	68.96	SAE	165	165	s_BY96-41 [5177]	BASALT [5177]								APHYRIC, MEDIUM-GRAINED [5177]	VOL			E		WR [5177]	51.38	2.49		15.07				10.69	9.15	5.69	0.16		1.28	2.74	0.35
[5177]	OCEAN ISLAND	KERGUELEN / KERGUELEN ARCHIPELAGO / MONT DES RUCHES	LORANCHET PENINSULA	-48.87	-48.87	68.96	68.96	SAE	60	60	s_BY96-42 [5177]	BASALT [5177]								APHYRIC, MEDIUM-GRAINED [5177]	VOL			E		WR [5177]	50.87	2.44		15.12				10.89	9.55	5.52	0.17		1.24	2.74	0.34
[5177]	OCEAN ISLAND	KERGUELEN / KERGUELEN ARCHIPELAGO / MONT DES RUCHES	LORANCHET PENINSULA	-48.87	-48.87	68.96	68.96	SAE	30	30	s_BY96-43 [5177]	BASALT [5177]								PLAGIOCLASE-PHYRIC [5177]	VOL			E		WR [5177]	49.46	2.62		15.36				12.12	9.73	4.44	0.22		0.64	3.29	0.63
[5177]	OCEAN ISLAND	KERGUELEN / KERGUELEN ARCHIPELAGO / MONT FONTAINE	LORANCHET PENINSULA	-48.85	-48.85	69.13	69.13	SAE	320	320	s_BY96-81 [5177]	BASALT [5177]								APHYRIC, SUBOPHITIC GROUNDMASS [5177]	VOL			E		WR [5177]	47.77	2.36		15.56				13.16	10.25	6.63	0.19		0.21	2.3	0.17
[5177]	OCEAN ISLAND	KERGUELEN / KERGUELEN ARCHIPELAGO / MONT FONTAINE	LORANCHET PENINSULA	-48.85	-48.85	69.13	69.13	SAE	315	315	s_BY96-83 [5177]	BASALT [5177]								OLIVINE PHYRIC, SUBOPHITIC GROUNDMASS [5177]	VOL			F		WR [5177]	46.26	3.28		14.07				13.14	9.86	7.56	0.18		0.41	2.53	0.31
[5177]	OCEAN ISLAND	KERGUELEN / KERGUELEN ARCHIPELAGO / MONT FONTAINE	LORANCHET PENINSULA	-48.85	-48.85	69.13	69.13	SAE	310	310	s_BY96-84 [5177]	BASALT [5177]								OLIVINE PHYRIC, SUBOPHITIC GROUNDMASS [5177]	VOL			F		WR [5177]	46.58	2.02		14.44				12.21	9.32	11.03	0.19		0.53	2.11	0.15
[5177]	OCEAN ISLAND	KERGUELEN / KERGUELEN ARCHIPELAGO / MONT FONTAINE	LORANCHET PENINSULA	-48.85	-48.85	69.13	69.13	SAE	305	305	s_BY96-85 [5177]	BASALT [5177]								OLIVINE PHYRIC, SUBOPHITIC GROUNDMASS [5177]	VOL			F		WR [5177]	45.3	1.5		14.26				11.45	10.43	11.7	0.19		0.69	1.89	0.22
[5177]	OCEAN ISLAND	KERGUELEN / KERGUELEN ARCHIPELAGO / MONT FONTAINE	LORANCHET PENINSULA	-48.85	-48.85	69.13	69.13	SAE	245	245	s_BY96-87 [5177]	BASALT [5177]								OLIVINE PHYRIC, SUBOPHITIC GROUNDMASS [5177]	VOL			E		WR [5177]	48.45	1.68		14.54				11.92	9.95	9.36	0.19		0.19	2.07	0.15
[5177]	OCEAN ISLAND	KERGUELEN / KERGUELEN ARCHIPELAGO / MONT FONTAINE	LORANCHET PENINSULA	-48.85	-48.85	69.13	69.13	SAE	245	245	s_BY96-87 [5177]	BASALT [5177]								OLIVINE PHYRIC, SUBOPHITIC GROUNDMASS [5177]	VOL			E		WR [5177]	48.69	1.69		14.63				11.97	9.99	9.43	0.19		0.19	2.24	0.15
[5177]	OCEAN ISLAND	KERGUELEN / KERGUELEN ARCHIPELAGO / MONT FONTAINE	LORANCHET PENINSULA	-48.85	-48.85	69.13	69.13	SAE	235	235	s_BY96-88 [5177]	BASALT [5177]								OLIVINE PHYRIC, SUBOPHITIC GROUNDMASS [5177]	VOL			E		WR [5177]	47.7	1.54		14.73				11.6	9.89	9.23	0.18		0.39	2.26	0.14
[5177]	OCEAN ISLAND	KERGUELEN / KERGUELEN ARCHIPELAGO / MONT FONTAINE	LORANCHET PENINSULA	-48.85	-48.85	69.13	69.13	SAE	220	220	s_BY96-90 [5177]	BASALT [5177]								OLIVINE PHYRIC, DOLERITIC GROUNDMASS [5177]	VOL			F		WR [5177]	48.04	1.69		14.14				11.31	10.16	10.07	0.17		0.47	2.41	0.24
[5177]	OCEAN ISLAND	KERGUELEN / KERGUELEN ARCHIPELAGO / MONT FONTAINE	LORANCHET PENINSULA	-48.85	-48.85	69.13	69.13	SAE	215	215	s_BY96-91 [5177]	BASALT [5177]								OLIVINE PHYRIC, DOLERITIC GROUNDMASS [5177]	VOL			F		WR [5177]	48.47	1.87		14.88				11.21	9.13	9.03	0.17		0.6	2.74	0.27
[5177]	OCEAN ISLAND	KERGUELEN / KERGUELEN ARCHIPELAGO / MONT FONTAINE	LORANCHET PENINSULA	-48.85	-48.85	69.13	69.13	SAE	205	205	s_BY96-92 [5177]	BASALT [5177]								OLIVINE PHYRIC, DOLERITIC GROUNDMASS [5177]	VOL			E		WR [5177]	48.86	1.9		14.9				10.93	8.79	10.06	0.16		0.62	2.39	0.28
[5177]	OCEAN ISLAND	KERGUELEN / KERGUELEN ARCHIPELAGO / MONT FONTAINE	LORANCHET PENINSULA	-48.85	-48.85	69.13	69.13	SAE	195	195	s_BY96-93 [5177]	BASALT [5177]								OLIVINE PHYRIC, DOLERITIC GROUNDMASS [5177]	VOL			E		WR [5177]	48	1.98		15.86				11	9.89	8.16	0.17		0.45	2.65	0.3
[5177]	OCEAN ISLAND	KERGUELEN / KERGUELEN ARCHIPELAGO / MONT FONTAINE	LORANCHET PENINSULA	-48.85	-48.85	69.13	69.13	SAE	185	185	s_BY96-94 [5177]	BASALT [5177]								OLIVINE PHYRIC, DOLERITIC GROUNDMASS [5177]	VOL			E		WR [5177]	47.78	1.32		15.7				11.83	10	9.69	0.22		0.33	1.99	0.15
[5177]	OCEAN ISLAND	KERGUELEN / KERGUELEN ARCHIPELAGO / MONT FONTAINE	LORANCHET PENINSULA	-48.85	-48.85	69.13	69.13	SAE	175	175	s_BY96-95 [5177]	BASALT [5177]								OLIVINE PHYRIC, DOLERITIC GROUNDMASS [5177]	VOL			E		WR [5177]	46.17	1.93		14.24				11.55	9.31	11.43	0.19		0.54	2.16	0.22
[5177]	OCEAN ISLAND	KERGUELEN / KERGUELEN ARCHIPELAGO / MONT FONTAINE	LORANCHET PENINSULA	-48.85	-48.85	69.13	69.13	SAE	170	170	s_BY96-96 [5177]	BASALT [5177]								OLIVINE PHYRIC, SUBOPHITIC GROUNDMASS [5177]	VOL			E		WR [5177]	48.24	1.22		15.1				10.87	10.52	10.82	0.18		0.19	2.02	0.12
[5177]	OCEAN ISLAND	KERGUELEN / KERGUELEN ARCHIPELAGO / MONT FONTAINE	LORANCHET PENINSULA	-48.85	-48.85	69.13	69.13	SAE	160	160	s_BY96-97 [5177]	BASALT [5177]								OLIVINE PHYRIC, DOLERITIC GROUNDMASS [5177]	VOL			M		WR [5177]	46.46	1.96		14.43				11.54	9.51	11.18	0.2		0.54	2.18	0.22
[5177]	OCEAN ISLAND	KERGUELEN / KERGUELEN ARCHIPELAGO / MONT FONTAINE	LORANCHET PENINSULA	-48.85	-48.85	69.13	69.13	SAE	80	80	s_BY96-99 [5177]	BASALT [5177]								OLIVINE PHYRIC, SUBOPHITIC GROUNDMASS [5177]	VOL			E		WR [5177]	48.17	1.82		15.46				10.71	9.67	9.24	0.17		0.75	2.3	0.21
[5177]	OCEAN ISLAND	KERGUELEN / KERGUELEN ARCHIPELAGO / MONT FONTAINE	LORANCHET PENINSULA	-48.85	-48.85	69.13	69.13	SAE	70	70	s_BY96-100 [5177]	BASALT [5177]								OLIVINE PHYRIC, DOLERITIC GROUNDMASS [5177]	VOL			F		WR [5177]	47.59	1.83		13.89				10.82	10.11	11.26	0.17		0.73	2.1	0.26
[5177]	OCEAN ISLAND	KERGUELEN / KERGUELEN ARCHIPELAGO / MONT FONTAINE	LORANCHET PENINSULA	-48.85	-48.85	69.13	69.13	SAE	50	50	s_BY96-101 [5177]	BASALT [5177]								OLIVINE PHYRIC, DOLERITIC GROUNDMASS [5177]	VOL			F		WR [5177]	49.98	3.73		13.14				13.43	8.93	4.64	0.22		0.58	2.97	0.47
[5177]	OCEAN ISLAND	KERGUELEN / KERGUELEN ARCHIPELAGO / MONT FONTAINE	LORANCHET PENINSULA	-48.85	-48.85	69.13	69.13	SAE	10	10	s_BY96-102 [5177]	BASALT [5177]								PLAGIOCLASE-CLINOPYROXENE PHYRIC, DOLERITIC GROUNDMASS [5177]	VOL			S		WR [5177]	50.94	2.86		14.78				12.89	8.97	3.78	0.21		0.8	3.01	0.41
[5177]	OCEAN ISLAND	KERGUELEN / KERGUELEN ARCHIPELAGO / MONT DES RUCHES	LORANCHET PENINSULA	-48.87	-48.87	68.96	68.96	SAE	30	30	s_BY96-43 [5177]	BASALT [5177]								PLAGIOCLASE-PHYRIC [5177]	VOL			E		WR [5177]
[5176]	OCEAN ISLAND	KERGUELEN / KERGUELEN ARCHIPELAGO / MOUNT CROZIER		-48.55	-49.75	68.5	70.58	SAE			s_OB93-114 [5176]	TRACHYANDESITE, BASALTIC [5176]	24800000 [5176]	24800000 [5176]							VOL					WR [5176]
[5176]	OCEAN ISLAND	KERGUELEN / KERGUELEN ARCHIPELAGO / MOUNT CROZIER		-48.55	-49.75	68.5	70.58	SAE			s_OB93-114 [5176]	TRACHYANDESITE, BASALTIC [5176]	24800000 [5176]	24800000 [5176]							VOL					WR [5176]
[5176]	OCEAN ISLAND	KERGUELEN / KERGUELEN ARCHIPELAGO / MOUNT CROZIER		-48.55	-49.75	68.5	70.58	SAE			s_OB93-183 [5176]	BASALT [5176]	24800000 [5176]	24800000 [5176]							VOL					WR [5176]
[5176]	OCEAN ISLAND	KERGUELEN / KERGUELEN ARCHIPELAGO / MOUNT CROZIER		-48.55	-49.75	68.5	70.58	SAE			s_OB93-190 [5176]	BASALT [5176]	24800000 [5176]	24800000 [5176]							VOL					WR [5176]
[5176]	OCEAN ISLAND	KERGUELEN / KERGUELEN ARCHIPELAGO / MOUNT CROZIER		-48.55	-49.75	68.5	70.58	SAE			s_OB93-192 [5176]	BASALT [5176]	24800000 [5176]	24800000 [5176]							VOL					WR [5176]
[5176]	OCEAN ISLAND	KERGUELEN / KERGUELEN ARCHIPELAGO / MOUNT CROZIER		-48.55	-49.75	68.5	70.58	SAE			s_OB93-194 [5176]	TRACHYANDESITE [5176]	24800000 [5176]	24800000 [5176]							VOL					WR [5176]
[5176]	OCEAN ISLAND	KERGUELEN / KERGUELEN ARCHIPELAGO / MOUNT CROZIER		-48.55	-49.75	68.5	70.58	SAE			s_OB93-201 [5176]	TRACHYBASALT [5176]	24800000 [5176]	24800000 [5176]							VOL					WR [5176]
[5176]	OCEAN ISLAND	KERGUELEN / KERGUELEN ARCHIPELAGO / MOUNT CROZIER		-48.55	-49.75	68.5	70.58	SAE			s_OB93-206 [5176]	TRACHYBASALT [5176]	24800000 [5176]	24800000 [5176]							VOL					WR [5176]
[5176]	OCEAN ISLAND	KERGUELEN / KERGUELEN ARCHIPELAGO / MOUNT CROZIER		-48.55	-49.75	68.5	70.58	SAE			s_OB93-206_LEACHED [5176]	TRACHYBASALT [5176]	24800000 [5176]	24800000 [5176]							VOL					WR [5176]
[5176]	OCEAN ISLAND	KERGUELEN / KERGUELEN ARCHIPELAGO / MOUNT ROSS		-49.58	-49.58	69.5	69.5	SAE			s_143_LEACHED [5176]	TRACHYTE [5176]		2000000 [5176]							VOL					WR [5176]
[5174]	OCEAN ISLAND	KERGUELEN / KERGUELEN ARCHIPELAGO / MOUNT DE LA TOURMENTE		-49.5	-49.5	70.5	70.5	SAE	563	563	s_93-353 [5174]	BASALT, TRANSITIONAL [5174]				CENOZOIC [5174]					VOL					WR [5174]	48.32	3.82		13.12				14.29	9.57	5.09	0.26		0.68	3.01	0.45
[5174]	OCEAN ISLAND	KERGUELEN / KERGUELEN ARCHIPELAGO / MOUNT DE LA TOURMENTE		-49.5	-49.5	70.5	70.5	SAE	555	555	s_93-354 [5174]	BASALT, TRANSITIONAL [5174]				CENOZOIC [5174]					VOL					WR [5174]	47.57	4.26		12.74				15.04	9.18	4.8	0.26		0.96	3.12	0.52
[5174]	OCEAN ISLAND	KERGUELEN / KERGUELEN ARCHIPELAGO / MOUNT DE LA TOURMENTE		-49.5	-49.5	70.5	70.5	SAE	545	545	s_93-355 [5174]	BASALT, TRANSITIONAL [5174]				CENOZOIC [5174]					VOL					WR [5174]	46.44	4.24		13.58				14.54	9.98	4.97	0.33		0.62	2.97	0.5
[5174]	OCEAN ISLAND	KERGUELEN / KERGUELEN ARCHIPELAGO / MOUNT DE LA TOURMENTE		-49.5	-49.5	70.5	70.5	SAE	533	533	s_93-357 [5174]	BASALT, TRANSITIONAL [5174]				CENOZOIC [5174]					VOL					WR [5174]	46.61	3.86		13.29				14.73	10.02	5.48	0.27		0.68	2.85	0.42
[5174]	OCEAN ISLAND	KERGUELEN / KERGUELEN ARCHIPELAGO / MOUNT DE LA TOURMENTE		-49.5	-49.5	70.5	70.5	SAE	529	529	s_93-358 [5174]	BASALT, ALKALINE [5174]				CENOZOIC [5174]					VOL					WR [5174]	46.89	3.83		13.14				14.82	10.04	5.29	0.25		0.6	2.91	0.42
[5174]	OCEAN ISLAND	KERGUELEN / KERGUELEN ARCHIPELAGO / MOUNT DE LA TOURMENTE		-49.5	-49.5	70.5	70.5	SAE	519	519	s_93-359 [5174]	BASALT, TRANSITIONAL [5174]				CENOZOIC [5174]					VOL					WR [5174]	47.85	3.41		13.79				13.74	10.7	5.19	0.22		0.39	2.76	0.34
[5174]	OCEAN ISLAND	KERGUELEN / KERGUELEN ARCHIPELAGO / MOUNT DE LA TOURMENTE		-49.5	-49.5	70.5	70.5	SAE	512	512	s_93-360 [5174]	BASALT, TRANSITIONAL [5174]				CENOZOIC [5174]					VOL					WR [5174]	48.07	3.3		13.81				13.42	10.64	5.42	0.23		0.39	2.8	0.35
[5174]	OCEAN ISLAND	KERGUELEN / KERGUELEN ARCHIPELAGO / MOUNT DE LA TOURMENTE		-49.5	-49.5	70.5	70.5	SAE	504	504	s_93-361 [5174]	BASALT, TRANSITIONAL [5174]				CENOZOIC [5174]					VOL					WR [5174]	47.05	3.59		13.64				14.34	9.98	5.42	0.23		0.48	2.72	0.44
[5174]	OCEAN ISLAND	KERGUELEN / KERGUELEN ARCHIPELAGO / MOUNT DE LA TOURMENTE		-49.5	-49.5	70.5	70.5	SAE	496	496	s_93-362 [5174]	BASALT, TRANSITIONAL [5174]				CENOZOIC [5174]					VOL					WR [5174]	46.62	3.71		13.53				14.88	10.01	5.41	0.24		0.36	2.77	0.45
[5174]	OCEAN ISLAND	KERGUELEN / KERGUELEN ARCHIPELAGO / MOUNT DE LA TOURMENTE		-49.5	-49.5	70.5	70.5	SAE	485	485	s_93-363 [5174]	BASALT, TRANSITIONAL [5174]				CENOZOIC [5174]					VOL					WR [5174]	46.72	3.93		13.42				14.9	10.4	5.35	0.24		0.38	2.66	0.45
[5174]	OCEAN ISLAND	KERGUELEN / KERGUELEN ARCHIPELAGO / MOUNT DE LA TOURMENTE		-49.5	-49.5	70.5	70.5	SAE	475	475	s_93-364 [5174]	BASALT, TRANSITIONAL [5174]				CENOZOIC [5174]					VOL					WR [5174]	49.18	3.47		13.01				13.96	9.59	5.05	0.24		0.57	2.99	0.39
[5174]	OCEAN ISLAND	KERGUELEN / KERGUELEN ARCHIPELAGO / MOUNT DE LA TOURMENTE		-49.5	-49.5	70.5	70.5	SAE	466	466	s_93-365 [5174]	BASALT, TRANSITIONAL [5174]				CENOZOIC [5174]					VOL					WR [5174]	47.83	3.36		14.03				13.61	10.37	5.54	0.24		0.4	2.68	0.41
[5174]	OCEAN ISLAND	KERGUELEN / KERGUELEN ARCHIPELAGO / MOUNT DE LA TOURMENTE		-49.5	-49.5	70.5	70.5	SAE	462	462	s_93-366 [5174]	BASALT, TRANSITIONAL [5174]				CENOZOIC [5174]					VOL					WR [5174]	49.4	3.2		13.32				13.16	9.91	5.31	0.22		0.58	3.15	0.37
[5174]	OCEAN ISLAND	KERGUELEN / KERGUELEN ARCHIPELAGO / MOUNT DE LA TOURMENTE		-49.5	-49.5	70.5	70.5	SAE	456	456	s_93-367 [5174]	BASALT, TRANSITIONAL [5174]				CENOZOIC [5174]					VOL					WR [5174]	49.67	3.36		13.19				13.53	9.61	4.83	0.24		0.47	2.88	0.42
[5174]	OCEAN ISLAND	KERGUELEN / KERGUELEN ARCHIPELAGO / MOUNT DE LA TOURMENTE		-49.5	-49.5	70.5	70.5	SAE	445	445	s_93-368 [5174]	BASALT, TRANSITIONAL [5174]				CENOZOIC [5174]					VOL					WR [5174]	49.66	3.14		13.49				13.2	9.99	5.45	0.24		0.53	2.91	0.33
[5174]	OCEAN ISLAND	KERGUELEN / KERGUELEN ARCHIPELAGO / MOUNT DE LA TOURMENTE		-49.5	-49.5	70.5	70.5	SAE	436	436	s_93-369 [5174]	BASALT, TRANSITIONAL [5174]				CENOZOIC [5174]					VOL					WR [5174]	49.41	3.11		13.45				13.15	10.05	5.49	0.24		0.48	2.85	0.35
[5174]	OCEAN ISLAND	KERGUELEN / KERGUELEN ARCHIPELAGO / MOUNT DE LA TOURMENTE		-49.5	-49.5	70.5	70.5	SAE	431	431	s_93-370 [5174]	BASALT, TRANSITIONAL [5174]				CENOZOIC [5174]					VOL					WR [5174]	49.49	3.13		13.47				13.13	10.06	5.4	0.23		0.47	2.83	0.34
[5174]	OCEAN ISLAND	KERGUELEN / KERGUELEN ARCHIPELAGO / MOUNT DE LA TOURMENTE		-49.5	-49.5	70.5	70.5	SAE	424	424	s_93-371 [5174]	BASALT, TRANSITIONAL [5174]				CENOZOIC [5174]					VOL					WR [5174]	49.28	3.65		12.76				14.32	9.27	4.75	0.26		0.48	2.9	0.43
[5174]	OCEAN ISLAND	KERGUELEN / KERGUELEN ARCHIPELAGO / MOUNT DE LA TOURMENTE		-49.5	-49.5	70.5	70.5	SAE	418	418	s_93-372 [5174]	BASALT, TRANSITIONAL [5174]				CENOZOIC [5174]					VOL					WR [5174]	50.38	3.56		13.15				13.34	8.83	4.22	0.24		1.22	2.95	0.41
[5174]	OCEAN ISLAND	KERGUELEN / KERGUELEN ARCHIPELAGO / MOUNT DE LA TOURMENTE		-49.5	-49.5	70.5	70.5	SAE	412	412	s_93-373 [5174]	BASALT, TRANSITIONAL [5174]				CENOZOIC [5174]					VOL					WR [5174]	49.86	3.45		13.09				13.54	9.37	4.89	0.23		0.79	2.95	0.4
[5174]	OCEAN ISLAND	KERGUELEN / KERGUELEN ARCHIPELAGO / MOUNT DE LA TOURMENTE		-49.5	-49.5	70.5	70.5	SAE	406	406	s_93-374 [5174]	BASALT, TRANSITIONAL [5174]				CENOZOIC [5174]					VOL					WR [5174]	50.24	3.41		12.96				13.25	9.24	4.72	0.22		0.68	3.01	0.38
[5174]	OCEAN ISLAND	KERGUELEN / KERGUELEN ARCHIPELAGO / MOUNT DE LA TOURMENTE		-49.5	-49.5	70.5	70.5	SAE	396	396	s_93-375 [5174]	BASALT, TRANSITIONAL [5174]				CENOZOIC [5174]					VOL					WR [5174]	49.28	3.63		13.2				13.87	8.84	4.72	0.24		0.85	2.88	0.42
[5174]	OCEAN ISLAND	KERGUELEN / KERGUELEN ARCHIPELAGO / MOUNT DE LA TOURMENTE		-49.5	-49.5	70.5	70.5	SAE	392	392	s_93-376 [5174]	BASALT, TRANSITIONAL [5174]				CENOZOIC [5174]					VOL					WR [5174]	49.29	3.06		14.29				12.14	10.29	5.45	0.2		0.47	2.82	0.38
[5174]	OCEAN ISLAND	KERGUELEN / KERGUELEN ARCHIPELAGO / MOUNT DE LA TOURMENTE		-49.5	-49.5	70.5	70.5	SAE	363	363	s_93-377 [5174]	BASALT, TRANSITIONAL [5174]				CENOZOIC [5174]					VOL					WR [5174]	49.22	3.73		13.21				13.88	9.03	4.83	0.23		0.76	3.08	0.46
[5174]	OCEAN ISLAND	KERGUELEN / KERGUELEN ARCHIPELAGO / MOUNT DE LA TOURMENTE		-49.5	-49.5	70.5	70.5	SAE	345	345	s_93-378 [5174]	BASALT, TRANSITIONAL [5174]				CENOZOIC [5174]					VOL					WR [5174]	49.04	3.03		14.93				11.91	10.38	5.47	0.22		0.75	2.82	0.37
[5174]	OCEAN ISLAND	KERGUELEN / KERGUELEN ARCHIPELAGO / MOUNT DE LA TOURMENTE		-49.5	-49.5	70.5	70.5	SAE	345	345	s_93-379 [5174]	BASALT, TRANSITIONAL [5174]				CENOZOIC [5174]					VOL					WR [5174]	49.3	2.92		14.49				12.15	10.34	5.32	0.21		0.58	2.73	0.35
[5174]	OCEAN ISLAND	KERGUELEN / KERGUELEN ARCHIPELAGO / MOUNT DE LA TOURMENTE		-49.5	-49.5	70.5	70.5	SAE	341	341	s_93-380 [5174]	BASALT, TRANSITIONAL [5174]				CENOZOIC [5174]					VOL					WR [5174]	47.75	3.7		13.91				13.52	10.22	5.57	0.27		0.29	2.76	0.39
[5174]	OCEAN ISLAND	KERGUELEN / KERGUELEN ARCHIPELAGO / MOUNT DE LA TOURMENTE		-49.5	-49.5	70.5	70.5	SAE	340	340	s_93-381 [5174]	BASALT, TRANSITIONAL [5174]				CENOZOIC [5174]					VOL					WR [5174]	48.87	2.88		14.29				12.21	10.5	5.99	0.2		0.43	2.8	0.29
[5174]	OCEAN ISLAND	KERGUELEN / KERGUELEN ARCHIPELAGO / MOUNT DE LA TOURMENTE		-49.5	-49.5	70.5	70.5	SAE	329	329	s_93-382 [5174]	BASALT, TRANSITIONAL [5174]				CENOZOIC [5174]					VOL					WR [5174]	49.43	2.88		13.88				12.25	10.74	5.65	0.2		0.53	2.76	0.31
[5174]	OCEAN ISLAND	KERGUELEN / KERGUELEN ARCHIPELAGO / MOUNT DE LA TOURMENTE		-49.5	-49.5	70.5	70.5	SAE	324	324	s_93-383 [5174]	BASALT, TRANSITIONAL [5174]				CENOZOIC [5174]					VOL					WR [5174]	50.03	3.18		13.47				13.16	9.23	4.64	0.23		0.59	3.26	0.43
[5174]	OCEAN ISLAND	KERGUELEN / KERGUELEN ARCHIPELAGO / MOUNT DE LA TOURMENTE		-49.5	-49.5	70.5	70.5	SAE	316	316	s_93-384 [5174]	BASALT, TRANSITIONAL [5174]				CENOZOIC [5174]					VOL					WR [5174]	50.67	3.21		13.49				12.89	8.79	4.52	0.22		1.15	3.06	0.43
[5174]	OCEAN ISLAND	KERGUELEN / KERGUELEN ARCHIPELAGO / MOUNT DE LA TOURMENTE		-49.5	-49.5	70.5	70.5	SAE	308	308	s_93-385 [5174]	BASALT, TRANSITIONAL [5174]				CENOZOIC [5174]					VOL					WR [5174]	49.09	3.63		13.15				13.78	9.59	4.89	0.23		0.45	3.02	0.41
[5174]	OCEAN ISLAND	KERGUELEN / KERGUELEN ARCHIPELAGO / MOUNT DE LA TOURMENTE		-49.5	-49.5	70.5	70.5	SAE	296	296	s_93-386 [5174]	BASALT, TRANSITIONAL [5174]				CENOZOIC [5174]					VOL					WR [5174]	50.57	3.54		13.33				13.06	8.61	4.39	0.22		0.9	3.23	0.45
[5174]	OCEAN ISLAND	KERGUELEN / KERGUELEN ARCHIPELAGO / MOUNT DE LA TOURMENTE		-49.5	-49.5	70.5	70.5	SAE	287	287	s_93-387 [5174]	BASALT, TRANSITIONAL [5174]				CENOZOIC [5174]					VOL					WR [5174]	49.05	3.05		14.28				12.12	10.3	5.48	0.2		0.47	2.88	0.37
[5174]	OCEAN ISLAND	KERGUELEN / KERGUELEN ARCHIPELAGO / MOUNT DE LA TOURMENTE		-49.5	-49.5	70.5	70.5	SAE	281	281	s_93-388 [5174]	BASALT, TRANSITIONAL [5174]				CENOZOIC [5174]					VOL					WR [5174]	49.36	3.19		13.46				12.97	9.77	5.46	0.22		0.65	2.91	0.42
[5174]	OCEAN ISLAND	KERGUELEN / KERGUELEN ARCHIPELAGO / MOUNT DE LA TOURMENTE		-49.5	-49.5	70.5	70.5	SAE	272	272	s_93-389 [5174]	BASALT, TRANSITIONAL [5174]				CENOZOIC [5174]					VOL					WR [5174]	48.52	3.67		13.41				13.25	9.87	5.39	0.24		0.6	2.87	0.42
[5174]	OCEAN ISLAND	KERGUELEN / KERGUELEN ARCHIPELAGO / MOUNT DE LA TOURMENTE		-49.5	-49.5	70.5	70.5	SAE	256	256	s_93-390 [5174]	BASALT, TRANSITIONAL [5174]				CENOZOIC [5174]					VOL					WR [5174]	50.85	4.08		12.78				13.28	8.67	4.5	0.21		0.63	3.27	0.55
[5174]	OCEAN ISLAND	KERGUELEN / KERGUELEN ARCHIPELAGO / MOUNT DE LA TOURMENTE		-49.5	-49.5	70.5	70.5	SAE	248	248	s_93-391 [5174]	BASALT, TRANSITIONAL [5174]				CENOZOIC [5174]					VOL					WR [5174]	50.49	3.88		13.26				12.85	8.84	4.8	0.23		0.65	3.1	0.49
[5174]	OCEAN ISLAND	KERGUELEN / KERGUELEN ARCHIPELAGO / MOUNT DE LA TOURMENTE		-49.5	-49.5	70.5	70.5	SAE	222	222	s_93-393 [5174]	BASALT, TRANSITIONAL [5174]				CENOZOIC [5174]					VOL					WR [5174]	49.57	3.25		13.31				12.9	10.18	5.28	0.22		0.59	2.88	0.38
[5174]	OCEAN ISLAND	KERGUELEN / KERGUELEN ARCHIPELAGO / MOUNT DE LA TOURMENTE		-49.5	-49.5	70.5	70.5	SAE	216	216	s_93-394 [5174]	BASALT, ALKALINE [5174]				CENOZOIC [5174]					VOL					WR [5174]	48.95	3.76		13.9				12.75	9.09	5.02	0.24		1.38	3.03	0.45
[5174]	OCEAN ISLAND	KERGUELEN / KERGUELEN ARCHIPELAGO / MOUNT DE LA TOURMENTE		-49.5	-49.5	70.5	70.5	SAE	211	211	s_93-395 [5174]	BASALT, TRANSITIONAL [5174]				CENOZOIC [5174]					VOL					WR [5174]	49.38	3.71		13.74				12.66	9.47	5.09	0.21		0.67	3.06	0.44
[5174]	OCEAN ISLAND	KERGUELEN / KERGUELEN ARCHIPELAGO / MOUNT DE LA TOURMENTE		-49.5	-49.5	70.5	70.5	SAE	207	207	s_93-396 [5174]	BASALT, TRANSITIONAL [5174]				CENOZOIC [5174]					VOL					WR [5174]	49.86	3.63		13.43				12.58	9.2	4.94	0.22		0.77	3.11	0.44
[5174]	OCEAN ISLAND	KERGUELEN / KERGUELEN ARCHIPELAGO / MOUNT DE LA TOURMENTE		-49.5	-49.5	70.5	70.5	SAE	197	197	s_93-397 [5174]	BASALT, TRANSITIONAL [5174]				CENOZOIC [5174]					VOL					WR [5174]	49.93	3.65		13.5				12.56	9.27	5.01	0.22		0.75	3.07	0.44
[5174]	OCEAN ISLAND	KERGUELEN / KERGUELEN ARCHIPELAGO / MOUNT DE LA TOURMENTE		-49.5	-49.5	70.5	70.5	SAE	187	187	s_93-398 [5174]	BASALT, TRANSITIONAL [5174]				CENOZOIC [5174]					VOL					WR [5174]	50.52	3.67		13.47				12.55	8.35	4.34	0.21		1.25	3.28	0.56
[5174]	OCEAN ISLAND	KERGUELEN / KERGUELEN ARCHIPELAGO / MOUNT DE LA TOURMENTE		-49.5	-49.5	70.5	70.5	SAE	183	183	s_93-399 [5174]	BASALT, TRANSITIONAL [5174]				CENOZOIC [5174]					VOL					WR [5174]	50.22	3.46		12.98				13.85	8.8	4.49	0.23		0.57	3.24	0.44
[5174]	OCEAN ISLAND	KERGUELEN / KERGUELEN ARCHIPELAGO / MOUNT DE LA TOURMENTE		-49.5	-49.5	70.5	70.5	SAE	177	177	s_93-400 [5174]	BASALT, TRANSITIONAL [5174]				CENOZOIC [5174]					VOL					WR [5174]	49.39	3.51		13.3				14.09	8.85	4.61	0.23		0.93	2.97	0.45
[5174]	OCEAN ISLAND	KERGUELEN / KERGUELEN ARCHIPELAGO / MOUNT DE LA TOURMENTE		-49.5	-49.5	70.5	70.5	SAE	170	170	s_93-401 [5174]	BASALT, TRANSITIONAL [5174]				CENOZOIC [5174]					VOL					WR [5174]	50.11	3.18		13.93				11.94	10.1	5.09	0.22		0.78	2.82	0.36
[5174]	OCEAN ISLAND	KERGUELEN / KERGUELEN ARCHIPELAGO / MOUNT DE LA TOURMENTE		-49.5	-49.5	70.5	70.5	SAE	144	144	s_93-402 [5174]	BASALT, TRANSITIONAL [5174]				CENOZOIC [5174]					VOL					WR [5174]	48.94	2.79		13.99				11.81	11.09	6.01	0.2		0.44	2.67	0.3
[5174]	OCEAN ISLAND	KERGUELEN / KERGUELEN ARCHIPELAGO / MOUNT DE LA TOURMENTE		-49.5	-49.5	70.5	70.5	SAE	137	137	s_93-403 [5174]	BASALT, TRANSITIONAL [5174]				CENOZOIC [5174]					VOL					WR [5174]	48.48	2.84		14.2				12.07	11.13	6.2	0.21		0.41	2.66	0.3
[5174]	OCEAN ISLAND	KERGUELEN / KERGUELEN ARCHIPELAGO / MOUNT DE LA TOURMENTE		-49.5	-49.5	70.5	70.5	SAE	125	125	s_93-405 [5174]	BASALT, TRANSITIONAL [5174]				CENOZOIC [5174]					VOL					WR [5174]	50.47	3.41		13.25				13.13	8.89	4.64	0.22		0.64	3.12	0.43
[5174]	OCEAN ISLAND	KERGUELEN / KERGUELEN ARCHIPELAGO / MOUNT DE LA TOURMENTE		-49.5	-49.5	70.5	70.5	SAE	112	112	s_93-406 [5174]	BASALT, TRANSITIONAL [5174]				CENOZOIC [5174]					VOL					WR [5174]	50.42	3.51		13.43				13.56	8.1	4.2	0.24		0.96	3.15	0.51
[5174]	OCEAN ISLAND	KERGUELEN / KERGUELEN ARCHIPELAGO / MOUNT DE LA TOURMENTE		-49.5	-49.5	70.5	70.5	SAE	104	104	s_93-407 [5174]	BASALT, TRANSITIONAL [5174]				CENOZOIC [5174]					VOL					WR [5174]	51.15	3.33		13.96				12.65	7.87	4.05	0.22		1.31	3.23	0.41
[5174]	OCEAN ISLAND	KERGUELEN / KERGUELEN ARCHIPELAGO / MOUNT DE LA TOURMENTE		-49.5	-49.5	70.5	70.5	SAE	101	101	s_93-408 [5174]	BASALT, TRANSITIONAL [5174]				CENOZOIC [5174]					VOL					WR [5174]	51.2	3.39		13.48				12.85	8.45	4.4	0.22		0.89	3.23	0.48
[5174]	OCEAN ISLAND	KERGUELEN / KERGUELEN ARCHIPELAGO / MOUNT DE LA TOURMENTE		-49.5	-49.5	70.5	70.5	SAE	92	92	s_93-409 [5174]	BASALT, TRANSITIONAL [5174]				CENOZOIC [5174]					VOL					WR [5174]	49.6	2.98		13.85				12.4	10.16	5.57	0.22		0.38	2.77	0.35
[5174]	OCEAN ISLAND	KERGUELEN / KERGUELEN ARCHIPELAGO / MOUNT DE LA TOURMENTE		-49.5	-49.5	70.5	70.5	SAE	81	81	s_93-410 [5174]	BASALT, TRANSITIONAL [5174]				CENOZOIC [5174]					VOL					WR [5174]	49.91	3.07		13.48				12.59	9.7	5.43	0.22		0.56	2.95	0.35
[5174]	OCEAN ISLAND	KERGUELEN / KERGUELEN ARCHIPELAGO / MOUNT DE LA TOURMENTE		-49.5	-49.5	70.5	70.5	SAE	56	56	s_93-411 [5174]	BASALT, TRANSITIONAL [5174]				CENOZOIC [5174]					VOL					WR [5174]	49.79	3.33		13.46				13.47	9.2	4.88	0.22		0.46	3.3	0.45
[5174]	OCEAN ISLAND	KERGUELEN / KERGUELEN ARCHIPELAGO / MOUNT DE LA TOURMENTE		-49.5	-49.5	70.5	70.5	SAE	45	45	s_93-412 [5174]	BASALT, TRANSITIONAL [5174]				CENOZOIC [5174]					VOL					WR [5174]	49.95	3.31		13.42				13.53	8.84	4.71	0.23		0.75	3.22	0.45
[5174]	OCEAN ISLAND	KERGUELEN / KERGUELEN ARCHIPELAGO / MOUNT DE LA TOURMENTE		-49.5	-49.5	70.5	70.5	SAE	33	33	s_93-413 [5174]	BASALT, TRANSITIONAL [5174]				CENOZOIC [5174]					VOL					WR [5174]	50.47	3.27		13.2				13.36	8.96	4.68	0.22		0.78	3.28	0.45
[5174]	OCEAN ISLAND	KERGUELEN / KERGUELEN ARCHIPELAGO / MOUNT DE LA TOURMENTE		-49.5	-49.5	70.5	70.5	SAE	340	340	s_93-381 [5174]	BASALT, TRANSITIONAL [5174]				CENOZOIC [5174]					VOL					WR [5174]
[990][989]	OCEAN ISLAND	KERGUELEN / KERGUELEN ARCHIPELAGO	JEANNE D^ARC PENINSULA	-48.55	-49.75	68.5	70.58	SAE			s_3318 [990]	TRACHYTE [990]	8400000 [990]	8400000 [990]							VOL					WR [990]
[990][989]	OCEAN ISLAND	KERGUELEN / KERGUELEN ARCHIPELAGO	COURBET PENINSULA	-48.55	-49.75	68.5	70.58	SAE			s_3316 [990]	TRACHYTE [990]	20000000 [990]	20000000 [990]							VOL					WR [990]
[990][989]	OCEAN ISLAND	KERGUELEN / KERGUELEN ARCHIPELAGO	MONT BLANC	-48.55	-49.75	68.5	70.58	SAE			s_3317 [990]	BASALT [990]	16000000 [990]	16000000 [990]							VOL					WR [990]
[973][5176]	OCEAN ISLAND	KERGUELEN / FOCH / MOUNT BUREAU		-48.55	-49.75	68.5	70.58	SAE	40	40	s_GM92-59 [973]	BASALT, TRANSITIONAL [973] / BASALT [5176]	29300000 [5176]	29300000 [5176]							VOL					WR [973]	49.97	2.31		15.46				10.54	11.48	5.69	0.16		0.55	2.47	0.26
[973][5176]	OCEAN ISLAND	KERGUELEN / FOCH / MOUNT BUREAU	DIKE	-48.55	-49.75	68.5	70.58	SAE	145	145	s_GM92-52 [973]	BASALT, TRANSITIONAL [973] / BASALT [5176]	29300000 [5176]	29300000 [5176]							VOL					WR [973]	48.08	2.38		15.76				11.97	9.87	6.18	0.21		0.66	3.11	0.29
[973][5176][14785]	OCEAN ISLAND	KERGUELEN / FOCH / MOUNT BUREAU		-48.55	-49.75	68.5	70.58	SAE	250	250	s_GM92-48 [973]	BASALT, TRANSITIONAL [973] / BASALT [5176]	29300000 [5176]	29300000 [5176]							VOL					WR [973]	47.09	1.44		16.49				10.78	10.73	8.71	0.18		0.43	2.5	0.2
[973][5176]	OCEAN ISLAND	KERGUELEN / FOCH / MOUNT BUREAU		-48.55	-49.75	68.5	70.58	SAE	280	280	s_GM92-46 [973]	BASALT, TRANSITIONAL [973] / BASALT [5176]	29300000 [5176]	29300000 [5176]							VOL					WR [973]	46.36	1.87		14.91				12.75	9.43	10.18	0.21		0.17	2.24	0.14
[973]	OCEAN ISLAND	KERGUELEN / FOCH / MOUNT BUREAU		-48.55	-49.75	68.5	70.58	SAE	580	580	s_GM92-31 [973]	BASALT, TRANSITIONAL [973]									VOL					WR [973]	50.22	3.62		13.15				13.58	8.47	4.4	0.22		1.25	2.89	0.49
[973][5176]	OCEAN ISLAND	KERGUELEN / FOCH / MOUNT BUREAU		-48.55	-49.75	68.5	70.58	SAE	610	610	s_GM92-30 [973]	BASALT, TRANSITIONAL [973] / BASALT [5176]	29300000 [5176]	29300000 [5176]							VOL					WR [973]	50.92	3.31		13.46				12.24	9.24	4.84	0.21		1.07	2.74	0.43
[973][5176]	OCEAN ISLAND	KERGUELEN / FOCH / MOUNT BUREAU		-48.55	-49.75	68.5	70.58	SAE	620	620	s_GM92-29 [973]	BASALT, TRANSITIONAL [973] / BASALT [5176]	29300000 [5176]	29300000 [5176]							VOL					WR [973]	51.18	3.91		12.87				12.96	8.12	4.43	0.19		1.45	2.77	0.53
[973][5176]	OCEAN ISLAND	KERGUELEN / KERGUELEN ARCHIPELAGO / MOUNT RABOUILLERE	JOFFRE PENINSULA	-48.55	-49.75	68.5	70.58	SAE	30	30	s_GM92-153 [973]	BASALT, TRANSITIONAL [973] / BASALT [5176]	29000000 [5176]	29000000 [5176]							VOL					WR [973]	50.84	3.85		13.03				12.81	8.64	4.49	0.21		0.82	3.13	0.51
[973]	OCEAN ISLAND	KERGUELEN / KERGUELEN ARCHIPELAGO / MOUNT RABOUILLERE	JOFFRE PENINSULA	-48.55	-49.75	68.5	70.58	SAE	90	90	s_GM92-148 [973]	BASALT, TRANSITIONAL [973]									VOL			S		WR [973]	51.07	3.58						12.12	8.48	4.61	0.22		1.44	3	0.5
[973][5176]	OCEAN ISLAND	KERGUELEN / KERGUELEN ARCHIPELAGO / MOUNT RABOUILLERE	JOFFRE PENINSULA	-48.55	-49.75	68.5	70.58	SAE	130	130	s_GM92-145 [973]	BASALT, TRANSITIONAL [973] / BASALT [5176]	29000000 [5176]	29000000 [5176]							VOL					WR [973]	48	1.75						11.14	11.07	7.08	0.18		0.44	2.81	0.18
[973][5176]	OCEAN ISLAND	KERGUELEN / KERGUELEN ARCHIPELAGO / MOUNT RABOUILLERE	JOFFRE PENINSULA	-48.55	-49.75	68.5	70.58	SAE	160	160	s_GM92-144 [973]	BASALT, TRANSITIONAL [973] / BASALT [5176]	29000000 [5176]	29000000 [5176]							VOL					WR [973]	49.65	3.19						12.84	9.26	5.85	0.21		0.8	2.98	0.39
[973]	OCEAN ISLAND	KERGUELEN / KERGUELEN ARCHIPELAGO / MOUNT RABOUILLERE	JOFFRE PENINSULA	-48.55	-49.75	68.5	70.58	SAE	300	300	s_GM92-135 [973]	BASALT, TRANSITIONAL [973]									VOL					WR [973]	51.97	3.36		13.33				12.74	7.93	3.97	0.21		1.43	3.1	0.44
[973][5176]	OCEAN ISLAND	KERGUELEN / KERGUELEN ARCHIPELAGO / MOUNT RABOUILLERE	JOFFRE PENINSULA	-48.55	-49.75	68.5	70.58	SAE	380	380	s_GM92-129 [973]	BASALT, TRANSITIONAL [973] / BASALT [5176]	29000000 [5176]	29000000 [5176]							VOL					WR [973]	47.79	1.6		16.11				11.21	10.56	8.37	0.17		0.25	2.53	0.14
[973][5176]	OCEAN ISLAND	KERGUELEN / KERGUELEN ARCHIPELAGO / MOUNT RABOUILLERE	JOFFRE PENINSULA	-48.55	-49.75	68.5	70.58	SAE	400	400	s_GM92-127 [973]	BASALT, TRANSITIONAL [973] / BASALT [5176]	29000000 [5176]	29000000 [5176]							VOL					WR [973]	50.61	3.89		12.69				13.68	8.05	4.29	0.21		1.42	2.9	0.51
[1258]	OCEAN ISLAND	KERGUELEN / FOCH		-48.55	-49.75	68.5	70.58	SAE			s_KG2-3 [1258]	THOLEIITE [1258]									VOL					WR [1258]
[1258]	OCEAN ISLAND	KERGUELEN / FOCH		-48.55	-49.75	68.5	70.58	SAE			s_KG4-2 [1258]	THOLEIITE [1258]									VOL					WR [1258]
[1258]	OCEAN ISLAND	KERGUELEN / FOCH		-48.55	-49.75	68.5	70.58	SAE			s_KG5-1 [1258]	THOLEIITE [1258]									VOL					WR [1258]
[1258]	OCEAN ISLAND	KERGUELEN / FOCH		-48.55	-49.75	68.5	70.58	SAE			s_KG6-1 [1258]	THOLEIITE [1258]									VOL					WR [1258]
[1258]	OCEAN ISLAND	KERGUELEN / FOCH		-48.55	-49.75	68.5	70.58	SAE			s_KG7-2 [1258]	THOLEIITE [1258]									VOL					WR [1258]
[1258]	OCEAN ISLAND	KERGUELEN / KERGUELEN ARCHIPELAGO	COURBET PENINSULA	-48.55	-49.75	68.5	70.58	SAE			s_KG11-2 [1258]	BASALT, ALKALINE [1258]									VOL					WR [1258]
[1258]	OCEAN ISLAND	KERGUELEN / KERGUELEN ARCHIPELAGO	COURBET PENINSULA	-48.55	-49.75	68.5	70.58	SAE			s_KG16-6 [1258]	BASALT, ALKALINE [1258]									VOL					WR [1258]
[1258]	OCEAN ISLAND	KERGUELEN / KERGUELEN ARCHIPELAGO	COURBET PENINSULA	-48.55	-49.75	68.5	70.58	SAE			s_KG17-3 [1258]	BASALT, ALKALINE [1258]									VOL					WR [1258]
[1258]	OCEAN ISLAND	KERGUELEN / KERGUELEN ARCHIPELAGO	COURBET PENINSULA	-48.55	-49.75	68.5	70.58	SAE			s_KG19-5 [1258]	BASALT, ALKALINE [1258]									VOL					WR [1258]
[7525][8665]	OCEAN ISLAND	KERGUELEN / KERGUELEN ARCHIPELAGO / AUBERT DE LA R‹E		-49.9	-49.9	69.64	69.64	SAE			s_AG99-34 [7525]	PICRITE [7525]	24000000 [7525]	25000000 [7525]							VOL			F	HE3_HE4(R/R(A)) from OLIVINE [8665], HE4_HE3 from OLIVINE [8665]	WR [7525] / MIN [8665]	46.16	1.86		9.51				11.9	9.06	17.42	0.19		0.74	1.74	0.24
[7525][8665]	OCEAN ISLAND	KERGUELEN / KERGUELEN ARCHIPELAGO / AUBERT DE LA R‹E		-49.9	-49.9	69.64	69.64	SAE			s_AG99-36 [7525]	PICRITE [7525]	24000000 [7525]	25000000 [7525]							VOL			M	HE3_HE4(R/R(A)) from OLIVINE [8665], HE4_HE3 from OLIVINE [8665]	WR [7525] / MIN [8665]	46.51	1.87		9.32				11.32	9.97	16.67	0.18		0.8	1.86	0.23
[7525][8665]	OCEAN ISLAND	KERGUELEN / KERGUELEN ARCHIPELAGO	ANSE DU NOTOTHENIA	-49.35	-49.35	69.89	69.89	SAE			s_AG99-126 [7525]	PICRITE [7525]	24000000 [7525]	25000000 [7525]							VOL			M	HE3_HE4(R/R(A)) from OLIVINE [8665], HE4_HE3 from OLIVINE [8665]	WR [7525] / MIN [8665]	46.94	1.86		10.73				12.2	9.7	14.52	0.19		0.63	1.91	0.2
[7525][8665]	OCEAN ISLAND	KERGUELEN / KERGUELEN ARCHIPELAGO	ANSE DU NOTOTHENIA	-49.35	-49.35	69.89	69.89	SAE			s_AG99-125 [7525]	BASALT, TRANSITIONAL [7525]	24000000 [7525]	25000000 [7525]							VOL			M	HE3_HE4(R/R(A)) from OLIVINE [8665], HE4_HE3 from OLIVINE [8665]	WR [7525] / MIN [8665]	47.54	2.12		12.53				11.95	10.45	10.51	0.19		0.66	2.32	0.22
[7525][8665]	OCEAN ISLAND	KERGUELEN / KERGUELEN ARCHIPELAGO / AUBERT DE LA R‹E		-49.9	-49.9	69.64	69.64	SAE			s_AG99-37 [7525]	BASALT, ALKALINE [7525]	24000000 [7525]	25000000 [7525]							VOL			F	HE3_HE4(R/R(A)) from OLIVINE [8665], HE4_HE3 from OLIVINE [8665]	WR [7525] / MIN [8665]	46.03	3.04		13.92				11.82	9.87	9.34	0.17		1.05	2.93	0.6
[7525][8665]	OCEAN ISLAND	KERGUELEN / KERGUELEN ARCHIPELAGO / AUBERT DE LA R‹E		-49.9	-49.9	69.64	69.64	SAE			s_AG99-35 [7525]	BASALT, ALKALINE [7525]	24000000 [7525]	25000000 [7525]							VOL			F	HE3_HE4(R/R(A)) from OLIVINE [8665], HE4_HE3 from OLIVINE [8665]	WR [7525] / MIN [8665]	46.06	3.27		14.01				12.22	9.45	9.11	0.18		0.97	2.99	0.55
[7525][8665]	OCEAN ISLAND	KERGUELEN / KERGUELEN ARCHIPELAGO	ARMOR	-49.48	-49.48	69.67	69.67	SAE			s_AG99-41 [7525]	BASALT, ALKALINE [7525]	24000000 [7525]	25000000 [7525]							VOL			F	HE3_HE4(R/R(A)) from OLIVINE [8665], HE4_HE3 from OLIVINE [8665]	WR [7525] / MIN [8665]	47.11	2.67		14.72				10.91	9.48	8.84	0.17		1.36	3.12	0.5
[7525][8665]	OCEAN ISLAND	KERGUELEN / KERGUELEN ARCHIPELAGO / AUBERT DE LA R‹E		-49.9	-49.9	69.64	69.64	SAE			s_AG99-38 [7525]	BASALT, ALKALINE [7525]	24000000 [7525]	25000000 [7525]							VOL			F	HE3_HE4(R/R(A)) from OLIVINE [8665], HE4_HE3 from OLIVINE [8665]	WR [7525] / MIN [8665]	47.66	2.81		15.63				10.91	9.16	7.29	0.16		1.71	3.1	0.74
[847][5176]	OCEAN ISLAND	KERGUELEN / KERGUELEN ARCHIPELAGO / MOUNT ROSS		-49.58	-49.58	69.5	69.5	SAE			s_99 [847]	TRACHYANDESITE, BASALTIC [847]		2000000 [5176]						FLUIDAL [847]	VOL					WR [847]	48.68	2.88		17.36				10.19	7.16	3.98	0.17		3.01	4.36	1.01
[847][5176]	OCEAN ISLAND	KERGUELEN / KERGUELEN ARCHIPELAGO / MOUNT ROSS		-49.58	-49.58	69.5	69.5	SAE			s_39 [847]	TRACHYANDESITE, BASALTIC [847]		2000000 [5176]						FLUIDAL [847]	VOL					WR [847]	49.53	2.49		17.12				9.93	6.73	3.51	0.2		3.31	4.69	1.43
[847][5176]	OCEAN ISLAND	KERGUELEN / KERGUELEN ARCHIPELAGO / MOUNT ROSS		-49.58	-49.58	69.5	69.5	SAE			s_143 [847]	TRACHYTE [847]		2000000 [5176]						FLUIDAL [847]	VOL					WR [847]	61	0.079		18.87				4.38	1.19	0.16	0.17		5.62	7.58	0.042
[6188]	OCEAN ISLAND	KERGUELEN / KERGUELEN ARCHIPELAGO	RALLIER DU BATY PENINSULA, NORTHERN RING COMPLEX, CALDERA TABLE DE L^INSTITUT	-48.55	-49.75	68.5	70.58	SAE			s_MM94-401 [6188]	BASALT [6188]									VOL					WR [6188]	45.48	2.25		15.33				12.63	10.46	7.88	0.18		1.31	2.24	0.51
[6188]	OCEAN ISLAND	KERGUELEN / KERGUELEN ARCHIPELAGO	RALLIER DU BATY PENINSULA, NORTHERN RING COMPLEX, CALDERA TABLE DE L^INSTITUT	-48.55	-49.75	68.5	70.58	SAE			s_MM94-406 [6188]	TRACHYBASALT [6188]									VOL					WR [6188]	46.32	3.76		14.71				13.13	8.96	4.93	0.17		2.41	2.9	1.38
[6188]	OCEAN ISLAND	KERGUELEN / KERGUELEN ARCHIPELAGO	RALLIER DU BATY PENINSULA, NORTHERN RING COMPLEX, CALDERA TABLE DE L^INSTITUT	-48.55	-49.75	68.5	70.58	SAE			s_MM94-536 [6188]	TRACHYBASALT [6188]									VOL					WR [6188]	47.3	3.9		15.05				13.6	10.01	5.2	0.18		2.22	2.83	1.2
[6188]	OCEAN ISLAND	KERGUELEN / KERGUELEN ARCHIPELAGO	RALLIER DU BATY PENINSULA, NORTHERN RING COMPLEX, CALDERA TABLE DE L^INSTITUT	-48.55	-49.75	68.5	70.58	SAE			s_MM94-566 [6188]	TRACHYANDESITE [6188]									VOL					WR [6188]	50.9	0.94		16.26				9.87	7.1	3.9	0.16		3.89	3.14	2.62
[6188]	OCEAN ISLAND	KERGUELEN / KERGUELEN ARCHIPELAGO	RALLIER DU BATY PENINSULA, NORTHERN RING COMPLEX, CALDERA TABLE DE L^INSTITUT	-48.55	-49.75	68.5	70.58	SAE			s_MM94-574 [6188]	TRACHYANDESITE [6188]									VOL					WR [6188]	50.21	3.01		15.53				11.2	7.38	3.55	0.16		3.41	3.77	1.14
[6188]	OCEAN ISLAND	KERGUELEN / KERGUELEN ARCHIPELAGO	RALLIER DU BATY PENINSULA, NORTHERN RING COMPLEX, CALDERA DOME-CARVA	-48.55	-49.75	68.5	70.58	SAE			s_MM94-438 [6188]	TRACHYTE [6188]									VOL					WR [6188]	61.55	0.63		16.19				5.33	1.28	0.43	0.17		5.89	5.61	0.12
[6188]	OCEAN ISLAND	KERGUELEN / KERGUELEN ARCHIPELAGO	RALLIER DU BATY PENINSULA, NORTHERN RING COMPLEX, CALDERA DOME-CARVA	-48.55	-49.75	68.5	70.58	SAE			s_MM94-446 [6188]	TRACHYTE [6188]									VOL					WR [6188]	62.1	0.83		16.97				5.16	1.74	0.61	0.13		6.5	5.74	0.19
[6188]	OCEAN ISLAND	KERGUELEN / KERGUELEN ARCHIPELAGO	RALLIER DU BATY PENINSULA, NORTHERN RING COMPLEX, CALDERA DOME-CARVA	-48.55	-49.75	68.5	70.58	SAE			s_MM94-447 [6188]	TRACHYTE [6188]									VOL					WR [6188]	63.72	0.58		16.56				5.37	1.31	0.37	0.18		5.87	6.45	0.1
[6188]	OCEAN ISLAND	KERGUELEN / KERGUELEN ARCHIPELAGO	RALLIER DU BATY PENINSULA, NORTHERN RING COMPLEX, CALDERA DOME-CARVA	-48.55	-49.75	68.5	70.58	SAE			s_MM94-448 [6188]	TRACHYTE [6188]									VOL					WR [6188]	62.71	0.65		17.25				3.88	1.5	0.44	0.11		6.2	5.87	0.13
[6188]	OCEAN ISLAND	KERGUELEN / KERGUELEN ARCHIPELAGO	RALLIER DU BATY PENINSULA, NORTHERN RING COMPLEX, CALDERA DOME-CARVA	-48.55	-49.75	68.5	70.58	SAE			s_MM94-449 [6188]	TRACHYTE [6188]									VOL					WR [6188]	63.66	0.09		16.31				5.42	1.28	0.34	0.18		5.68	6.4	0.57
[6188]	OCEAN ISLAND	KERGUELEN / KERGUELEN ARCHIPELAGO	RALLIER DU BATY PENINSULA, NORTHERN RING COMPLEX, CALDERA DOME-CARVA	-48.55	-49.75	68.5	70.58	SAE			s_MM94-450 [6188]	TRACHYTE [6188]									VOL					WR [6188]	63.92	0.13		16.53				4.47	1.29	0.37	0.13		6.09	6.3	0.65
[6188]	OCEAN ISLAND	KERGUELEN / KERGUELEN ARCHIPELAGO	RALLIER DU BATY PENINSULA, NORTHERN RING COMPLEX, CALDERA DOME-CARVA	-48.55	-49.75	68.5	70.58	SAE			s_MM94-451 [6188]	TRACHYTE [6188]									VOL					WR [6188]	62.84	0.62		16.2				5.14	1.36	0.38	0.19		5.84	5.99	0.11
[6188]	OCEAN ISLAND	KERGUELEN / KERGUELEN ARCHIPELAGO	RALLIER DU BATY PENINSULA, NORTHERN RING COMPLEX, CALDERA DOME-CARVA	-48.55	-49.75	68.5	70.58	SAE			s_MM94-515 [6188]	TRACHYTE [6188]									VOL					WR [6188]	63.51	0.58		16.21				5.77	1.32	0.32	0.18		5.86	6.87	0.11
[6188]	OCEAN ISLAND	KERGUELEN / KERGUELEN ARCHIPELAGO	RALLIER DU BATY PENINSULA, NORTHERN RING COMPLEX, CALDERA TABLE DE L^INSTITUT	-48.55	-49.75	68.5	70.58	SAE			s_MM94-516 [6188]	TRACHYTE [6188]									VOL					WR [6188]	63.24	0.64		15.03				6.5	1.15	0.3	0.25		5.44	6.49	0.11
[6188]	OCEAN ISLAND	KERGUELEN / KERGUELEN ARCHIPELAGO	RALLIER DU BATY PENINSULA, NORTHERN RING COMPLEX, CALDERA TABLE DE L^INSTITUT	-48.55	-49.75	68.5	70.58	SAE			s_MM94-519 [6188]	TRACHYTE [6188]									VOL					WR [6188]	62.72	0.77		16.97				4.45	1.31	0.6	0.16		6.38	6.26	0.17
[6188]	OCEAN ISLAND	KERGUELEN / KERGUELEN ARCHIPELAGO	RALLIER DU BATY PENINSULA, NORTHERN RING COMPLEX, CALDERA TABLE DE L^INSTITUT	-48.55	-49.75	68.5	70.58	SAE			s_MM94-520 [6188]	TRACHYTE [6188]									VOL					WR [6188]	61.65	0.74		16.81				4.3	1.25	0.57	0.14		6.28	6.1	0.16
[6188]	OCEAN ISLAND	KERGUELEN / KERGUELEN ARCHIPELAGO	RALLIER DU BATY PENINSULA, NORTHERN RING COMPLEX, CALDERA TABLE DE L^INSTITUT	-48.55	-49.75	68.5	70.58	SAE			s_MM94-521 [6188]	TRACHYTE [6188]									VOL					WR [6188]	62.53	0.82		16.86				4.55	1.3	0.62	0.13		6.3	5.98	0.18
[6188]	OCEAN ISLAND	KERGUELEN / KERGUELEN ARCHIPELAGO	RALLIER DU BATY PENINSULA, NORTHERN RING COMPLEX, CALDERA TABLE DE L^INSTITUT	-48.55	-49.75	68.5	70.58	SAE			s_MM94-522 [6188]	TRACHYTE [6188]									VOL					WR [6188]	62.88	0.87		16.82				5.95	0.27	0.19	0.17		6.75	5.59	0.2
[6188]	OCEAN ISLAND	KERGUELEN / KERGUELEN ARCHIPELAGO	RALLIER DU BATY PENINSULA, NORTHERN RING COMPLEX, CALDERA TABLE DE L^INSTITUT	-48.55	-49.75	68.5	70.58	SAE			s_MM94-523 [6188]	TRACHYTE [6188]									VOL					WR [6188]	63.86	0.83		17.06				4.63	1.36	0.64	0.17		6.19	5.99	0.17
[6188]	OCEAN ISLAND	KERGUELEN / KERGUELEN ARCHIPELAGO	RALLIER DU BATY PENINSULA, NORTHERN RING COMPLEX, CALDERA TABLE DE L^INSTITUT	-48.55	-49.75	68.5	70.58	SAE			s_MM94-527 [6188]	TRACHYTE [6188]									VOL					WR [6188]	63.12	0.75		16.36				5.02	1.09	0.51	0.17		5.81	5.74	0.14
[6188]	OCEAN ISLAND	KERGUELEN / KERGUELEN ARCHIPELAGO	RALLIER DU BATY PENINSULA, NORTHERN RING COMPLEX, CALDERA JOLIOT-CURIE	-48.55	-49.75	68.5	70.58	SAE			s_MM94-559 [6188]	TRACHYTE [6188]									VOL					WR [6188]	64.04	0.57		15.99				5.96	0.94	0.26	0.18		5.62	7.01	0.08
[6188]	OCEAN ISLAND	KERGUELEN / KERGUELEN ARCHIPELAGO	RALLIER DU BATY PENINSULA, NORTHERN RING COMPLEX, CALDERA JOLIOT-CURIE	-48.55	-49.75	68.5	70.58	SAE			s_MM94-560 [6188]	TRACHYTE [6188]									VOL					WR [6188]	63.5	0.57		15.8				6.06	0.94	0.28	0.2		5.62	6.84	0.09
[6188]	OCEAN ISLAND	KERGUELEN / KERGUELEN ARCHIPELAGO	RALLIER DU BATY PENINSULA, NORTHERN RING COMPLEX, CALDERA JOLIOT-CURIE	-48.55	-49.75	68.5	70.58	SAE			s_MM94-561 [6188]	TRACHYTE [6188]									VOL					WR [6188]	65.42	0.46		13.82				6.08	1.18	0.13	0.23		5.2	4.34	0.04
[6188]	OCEAN ISLAND	KERGUELEN / KERGUELEN ARCHIPELAGO	RALLIER DU BATY PENINSULA, NORTHERN RING COMPLEX, CALDERA JOLIOT-CURIE	-48.55	-49.75	68.5	70.58	SAE			s_MM94-572 [6188]	TRACHYTE [6188]									VOL					WR [6188]	61.03	1.01		16.47				5.61	2.11	0.83	0.17		6.38	5.16	0.32
[6188]	OCEAN ISLAND	KERGUELEN / KERGUELEN ARCHIPELAGO	RALLIER DU BATY PENINSULA, NORTHERN RING COMPLEX, EXTRA-CALDERA	-48.55	-49.75	68.5	70.58	SAE			s_MM94-579 [6188]	TRACHYTE [6188]									VOL					WR [6188]	63.66	0.57		15.62				6.46	1.2	0.3	0.24		5.4	6.79	0.08
[6188]	OCEAN ISLAND	KERGUELEN / KERGUELEN ARCHIPELAGO	RALLIER DU BATY PENINSULA, NORTHERN RING COMPLEX, EXTRA-CALDERA	-48.55	-49.75	68.5	70.58	SAE			s_MM94-586 [6188]	RHYOLITE [6188]									VOL					WR [6188]	68.93	0.26		10.23				5.28	0.31	0.08	0.14		4.26	5.51	0.01
[1006]	OCEAN ISLAND	KERGUELEN / KERGUELEN ARCHIPELAGO	JEANNE D^ARC PENINSULA, RAVIN DU CHARBON	-49.55	-49.55	69.82	69.82	SAE			s_ARC573 [1006]	TRACHYBASALT [1006]			LOWER [1006]	MIOCENE [1006]					VOL					WR [1006]	47.5	2.99		16.38				11.99	6.63	4.37	0.16		2.12	4.3	0.8
[473]	OCEAN ISLAND	KERGUELEN / ILE DE CORMORANS	BAIE DE LA MOUCHE	-48.55	-49.75	68.5	70.58	SAE			s_3 [473]	TRACHYTE, PANTELLERITIC [473]									VOL					WR [473]	64.96	0.59		15.06		0.65	4.32		1.58	0	0.15		5.45	6.79	0.05		0.52	0.26
[59]	OCEAN ISLAND	KERGUELEN / KERGUELEN ARCHIPELAGO		-48.55	-49.75	68.5	70.58	SAE			s_BM64927 [59]	BASALT [59]									VOL				HE3_HE4(R/R(A)) from CLINOPYROXENE [59]	MIN [59]
[94]	OCEAN ISLAND	KERGUELEN / FOCH		-48.55	-49.75	68.5	70.58	SAE			s_KG2-1 [94]	BASALT [94]									VOL					WR [94]
[94]	OCEAN ISLAND	KERGUELEN / FOCH		-48.55	-49.75	68.5	70.58	SAE			s_KG5-3 [94]	BASALT [94]									VOL					WR [94]
[94]	OCEAN ISLAND	KERGUELEN / KERGUELEN ARCHIPELAGO		-48.55	-49.75	68.5	70.58	SAE			s_KG8-4 [94]	BASALT [94]									VOL					WR [94]
[94]	OCEAN ISLAND	KERGUELEN / KERGUELEN ARCHIPELAGO		-48.55	-49.75	68.5	70.58	SAE			s_KG14-3 [94]	BASALT [94]									VOL					WR [94]
[94]	OCEAN ISLAND	KERGUELEN / KERGUELEN ARCHIPELAGO		-48.55	-49.75	68.5	70.58	SAE			s_I75 [94]	BASALT [94]									VOL					WR [94]
[94]	OCEAN ISLAND	KERGUELEN / KERGUELEN ARCHIPELAGO		-48.55	-49.75	68.5	70.58	SAE			s_I380 [94]	BASALT [94]									VOL					WR [94]
[94]	OCEAN ISLAND	KERGUELEN / KERGUELEN ARCHIPELAGO		-48.55	-49.75	68.5	70.58	SAE			s_I381 [94]	BASALT [94]									VOL					WR [94]
[1001]	OCEAN ISLAND	KERGUELEN / KERGUELEN ARCHIPELAGO / SHIELD STAGE	LORANCHET PENINSULA	-49	-49	69	69	SAE			s_BM64947 [1001]	THOLEIITE [1001]									VOL					WR [1001]	47.6	1.35		15.4				10.8	9.6	12.3	0.18		0.55	1.9	0.16
[1001]	OCEAN ISLAND	KERGUELEN / KERGUELEN ARCHIPELAGO / SHIELD STAGE	LORANCHET PENINSULA	-49	-49	69	69	SAE			s_BM64849 [1001]	THOLEIITE [1001]									VOL					WR [1001]	47	2.15		14.3				12.33	11	10.1	0.18		0.33	2.2	0.19
[1001]	OCEAN ISLAND	KERGUELEN / KERGUELEN ARCHIPELAGO / SHIELD STAGE	LORANCHET PENINSULA	-49	-49	69	69	SAE			s_BM75061 [1001]	THOLEIITE [1001]									VOL					WR [1001]	47.4	1.45		16.3				10.26	11.7	7.6	0.17		0.26	2.6	0.18
[1001]	OCEAN ISLAND	KERGUELEN / KERGUELEN ARCHIPELAGO / SHIELD STAGE	LORANCHET PENINSULA	-49	-49	69	69	SAE			s_BM64881 [1001]	THOLEIITE [1001]									VOL					WR [1001]	48.6	1.57		14.8				11.52	9.9	10.7	0.17		0.28	2	0.14
[1001]	OCEAN ISLAND	KERGUELEN / KERGUELEN ARCHIPELAGO / SHIELD STAGE	LORANCHET PENINSULA	-49	-49	69	69	SAE			s_BM64878 [1001]	BASALT, ALKALINE [1001]									VOL					WR [1001]	46.3	3.29		14.6				13.23	10	6.7	0.2		0.77	3	0.45
[1001]	OCEAN ISLAND	KERGUELEN / KERGUELEN ARCHIPELAGO / SHIELD STAGE	LORANCHET PENINSULA	-49	-49	69	69	SAE			s_BM75059 [1001]	BASALT, ALKALINE [1001]									VOL					WR [1001]	46	2.44		14.3				11.79	8.7	11.6	0.18		0.98	3.2	0.37
[1001]	OCEAN ISLAND	KERGUELEN / KERGUELEN ARCHIPELAGO / SHIELD STAGE	LORANCHET PENINSULA	-49	-49	69	69	SAE			s_BM64886 [1001]	BASALT, ALKALINE [1001]									VOL					WR [1001]	45.2	2.5		14				11.7	7.3	12	0.16		1.08	3.3	0.61
[1001]	OCEAN ISLAND	KERGUELEN / KERGUELEN ARCHIPELAGO / SHIELD STAGE	LORANCHET PENINSULA	-49	-49	69	69	SAE			s_BM75179 [1001]	BASALT, ALKALINE [1001]									VOL					WR [1001]	45.4	2.58		14.6				12.06	7.4	10.4	0.17		1.19	3.9	0.7
[1001]	OCEAN ISLAND	KERGUELEN / KERGUELEN ARCHIPELAGO		-48.55	-49.75	68.5	70.58	SAE			s_BM1967,P8(5) [1001]	BASALT, ALKALINE [1001]									VOL					WR [1001]	44.9	3.49		11.7				11.43	8.6	12.9	0.16		2.31	2.7	0.66
[1001]	OCEAN ISLAND	KERGUELEN / KERGUELEN ARCHIPELAGO		-48.55	-49.75	68.5	70.58	SAE			s_BM75190 [1001]	BASALT, ALKALINE [1001]									VOL					WR [1001]	46.2	1.93		13.1				11.52	9.8	13.6	0.18		1.39	1.8	0.37
[1001]	OCEAN ISLAND	KERGUELEN / KERGUELEN ARCHIPELAGO		-48.55	-49.75	68.5	70.58	SAE			s_BM64851 [1001]	BASALT, ALKALINE [1001]									VOL					WR [1001]	46.6	2.08		13.9				11.25	9.1	12.8	0.18		1.31	1.4	0.39
[1001]	OCEAN ISLAND	KERGUELEN / KERGUELEN ARCHIPELAGO		-48.55	-49.75	68.5	70.58	SAE			s_BM64852 [1001]	BASALT, ALKALINE [1001]									VOL					WR [1001]	47.5	2.2		14.3				11.79	9.4	10.4	0.17		1.51	1.9	0.41
[999][997]	OCEAN ISLAND	KERGUELEN / KERGUELEN ARCHIPELAGO	COURBET PENINSULA, MONT DU CHATEAU	-48.55	-49.75	68.5	70.58	SAE			s_77-211 [999]	BASALT, ALKALINE [999] / BASALT [997]									VOL					WR [999]	46.92	1.96		12.28		4.69	7.74		10	11.51	0.19		0.8	2.18	0.25		1.16	0.39
[999][997]	OCEAN ISLAND	KERGUELEN / KERGUELEN ARCHIPELAGO		-48.55	-49.75	68.5	70.58	SAE			s_80-135 [999]	BASALT, ALKALINE [999] / BASALT [997]									VOL					WR [999]	45.3	3.75		13.41		5.49	7.56		9.46	6.14	0.16		1.52	2.51	0.54
[999][997]	OCEAN ISLAND	KERGUELEN / KERGUELEN ARCHIPELAGO / SHIELD STAGE	LORANCHET PENINSULA	-49	-49	69	69	SAE			s_81-18 [999]	BASALT, TRANSITIONAL [999] / BASALT [997]									VOL					WR [999]	49.5	2.1		18.3		4.39	5.5		11	4	0.15		0.7	2.7
[999][997]	OCEAN ISLAND	KERGUELEN / KERGUELEN ARCHIPELAGO / SHIELD STAGE	LORANCHET PENINSULA	-49	-49	69	69	SAE			s_81-19 [999]	BASALT, TRANSITIONAL [999] / BASALT [997]									VOL					WR [999]	48.8	2.5		16.3		3.99	7.67		9.6	4	0.2		0.7	2.9
[999][997]	OCEAN ISLAND	KERGUELEN / KERGUELEN ARCHIPELAGO		-48.55	-49.75	68.5	70.58	SAE			s_80-71 [999]	BASALT, ALKALINE [999] / BASALT [997]									VOL					WR [999]	47.7	2.92		14.35		3.12	7.19		5.83	6.02	0.16		3.44	3.66	0.61
[1008]	OCEAN ISLAND	KERGUELEN / KERGUELEN ARCHIPELAGO	JEANNE D^ARC PENINSULA, ABOVE PORT JEANNE D^ARC	-48.55	-49.75	68.5	70.58	SAE			s_LVLK132 [1008]	HAWAIITE [1008]									VOL					WR [1008]	50.94	3.04		15.4		7.34	4.13		7.12	3.7	0.18		2.68	4.16	0.94
[1008]	OCEAN ISLAND	KERGUELEN / KERGUELEN ARCHIPELAGO	JEANNE D^ARC PENINSULA, NORTHEAST FLANK OF DOME ROUGE	-48.55	-49.75	68.5	70.58	SAE	300	300	s_LVLK127 [1008]	TRACHYTE [1008]									VOL					WR [1008]	63.04	0.32		16.95		2.86	2.47		1.93	0.13	0.16		5.89	5.9	0.06
[1008]	OCEAN ISLAND	KERGUELEN / KERGUELEN ARCHIPELAGO	JEANNE D^ARC PENINSULA, EXTRUSION AT THE WESTERN FLANK OF LE PLATEAU DU VENT	-48.55	-49.75	68.5	70.58	SAE	150	150	s_LVLK127A [1008]	TRACHYTE, QUARTZ [1008]									VOL					WR [1008]	64.32	0.32		16.36		1.87	3.21		1.44	0.23	0.17		5.83	5.67	0.04
[1008]	OCEAN ISLAND	KERGUELEN / KERGUELEN ARCHIPELAGO / MOUNT BERLIOZ	JEANNE D^ARC PENINSULA, EAST PLATEAU OF MOUNT BERLIOZ	-48.55	-49.75	68.5	70.58	SAE	610	610	s_ARC195 [1008]	NOT GIVEN [1008]									VOL					WR [1008]	44.33	4.16		14.27				13.16	8.64	5.77	0.19		3.88	2.97	1.36
[1008]	OCEAN ISLAND	KERGUELEN / KERGUELEN ARCHIPELAGO	RONARC^H PENINSULA, EXTRUSION AT THE BASE OF THE VALLEE DE L^ELEPHANT	-48.55	-49.75	68.5	70.58	SAE			s_LVLK93 [1008]	PHONOLITE, TEPHRI [1008]									VOL					WR [1008]	52.8	1.9		18.02		2.72	4.49		5.06	1.85	0.18		5.45	6.14	0.66
[1008]	OCEAN ISLAND	KERGUELEN / KERGUELEN ARCHIPELAGO / MOUNT ROUGE	RONARC^H PENINSULA, NORTHWEST FLANK OF MOUNT ROUGE	-48.55	-49.75	68.5	70.58	SAE	340	340	s_LVLK90 [1008]	PHONOLITE, TEPHRI [1008]									VOL					WR [1008]	53.18	1.81		18.66		1.65	4.78		4.65	1.96	0.15		6.27	5.5	0.5
[1008]	OCEAN ISLAND	KERGUELEN / KERGUELEN ARCHIPELAGO	JEANNE D^ARC PENINSULA, EXTRUSION OF LE COLISEE	-48.55	-49.75	68.5	70.58	SAE	100	100	s_LVLK86 [1008]	PHONOLITE [1008]									VOL					WR [1008]	56.43	0.22		22.05		2.17	1.06		0.87	0.05	0.17		5.81	11.1	0.01
[1008]	OCEAN ISLAND	KERGUELEN / KERGUELEN ARCHIPELAGO	JEANNE D^ARC PENINSULA, EXTRUSION AT THE SOUTHERN END OF THE VAL SOMBRE	-48.55	-49.75	68.5	70.58	SAE			s_LVLK121 [1008]	PHONOLITE [1008]									VOL					WR [1008]	57.63	0.22		22.44		1.11	0.7		0.79	0.12	0.11		5.73	10.4	0.03
[1008]	OCEAN ISLAND	KERGUELEN / KERGUELEN ARCHIPELAGO	RONARC^H PENINSULA, WEST OF ABRI ST. FRANCOIS	-48.55	-49.75	68.5	70.58	SAE	5	5	s_LVLK83 [1008]	PHONOLITE [1008]									VOL					WR [1008]	59.02	0.46		20.24		2.42	1.35		2.32	0.56	0.18		6.79	6.14	0.06
[1008]	OCEAN ISLAND	KERGUELEN / KERGUELEN ARCHIPELAGO / MOUNT BERLIOZ	JEANNE D^ARC PENINSULA, MOUNT BERLIOZ	-48.55	-49.75	68.5	70.58	SAE	650	650	s_LVLK105 [1008]	PHONOLITE [1008]									VOL					WR [1008]	62.1	0.04		19.19		3.46	0.5		0.62	0.23	0.26		4.78	8.68	0.01
[1348]	OCEAN ISLAND	KERGUELEN / FOCH		-48.55	-49.75	68.5	70.58	SAE			s_1 [1348]	BASALT, THOLEIITIC [1348]									VOL					WR [1348]	49	2.12		15.46		12.49	0		10.36	7.14	0.17		0.48	2.54	0.23
[1348]	OCEAN ISLAND	KERGUELEN / KERGUELEN ARCHIPELAGO	COOK SHIELD	-48.55	-49.75	68.5	70.58	SAE			s_2 [1348]	BASALT [1348]									VOL					WR [1348]	49.95	0.6		19.48		7.94	4.15		8.44	4.83	0.19		0.68	3.18	0.66
[1348]	OCEAN ISLAND	KERGUELEN / KERGUELEN ARCHIPELAGO	JEANNE D^ARC PENINSULA	-48.55	-49.75	68.5	70.58	SAE			s_3 [1348]	BASALT, OLIVINE [1348]									VOL					WR [1348]	49.31	1.4		16.79		7.51	5.51		8.69	5.52	0.33		1.57	3.08	0.66
[1348]	OCEAN ISLAND	KERGUELEN / KERGUELEN ARCHIPELAGO / SHIELD STAGE	LORANCHET PENINSULA	-49	-49	69	69	SAE			s_4 [1348]	BASALT, OLIVINE [1348]									VOL					WR [1348]	49.44	1.21		15.65		8.35	4.49		10.76	4.84	0.17		1.32	3.13	0.64
[1348]	OCEAN ISLAND	KERGUELEN / KERGUELEN ARCHIPELAGO / MOUNT DU CHATEAU		-48.55	-49.75	68.5	70.58	SAE			s_5 [1348]	BASALT, OLIVINE [1348]									VOL					WR [1348]	48.18	2.89		15.64		12.91	0		8.87	6.18	0.17		1.65	3.18	0.46
[1348]	OCEAN ISLAND	KERGUELEN / KERGUELEN ARCHIPELAGO / MOUNT DU CHATEAU		-48.55	-49.75	68.5	70.58	SAE			s_6 [1348]	HAWAIITE [1348]									VOL					WR [1348]	50.8	2.95		15.82		12.84	0		7.99	3.75	0.17		1.58	3.7	0.48
[1348]	OCEAN ISLAND	KERGUELEN / KERGUELEN ARCHIPELAGO	CAPE KIDDER	-48.55	-49.75	68.5	70.58	SAE			s_7 [1348]	BASALT, OLIVINE [1348]									VOL					WR [1348]	48.84	2.95		15.12		14.03	0		9.19	5.19	0.18		1.36	2.76	0.36
[1348]	OCEAN ISLAND	KERGUELEN / KERGUELEN ARCHIPELAGO	MOUNT DU CHALEEN AND MOUNT PEEPER	-48.55	-49.75	68.5	70.58	SAE			s_8 [1348]	BASALT, ALKALINE [1348]									VOL					WR [1348]	47.27	3.3		12.45		9.07	0		10.31	11.81	0.21		2.09	2.71	0.79
[1348]	OCEAN ISLAND	KERGUELEN / KERGUELEN ARCHIPELAGO		-48.55	-49.75	68.5	70.58	SAE			s_9 [1348]	BASALT [1348]									VOL					WR [1348]	48.03	1.61		17.78		6.84	5.13		9.24	4.23	0.15		2.32	3.74	0.92
[1348]	OCEAN ISLAND	KERGUELEN / KERGUELEN ARCHIPELAGO	PRINCE DE GALLES PENINSULA	-48.55	-49.75	68.5	70.58	SAE			s_10 [1348]	BASANITE [1348]									VOL					WR [1348]	45.75	3.26		12.45		10.93	0		9.85	10.75	0.21		2.2	3.53	1.06
[1348]	OCEAN ISLAND	KERGUELEN / KERGUELEN ARCHIPELAGO / MOUNT THOMPSON		-48.55	-49.75	68.5	70.58	SAE			s_11 [1348]	BASANITE [1348]									VOL					WR [1348]	45.1	1.53		16.42		5.41	5.63		11.13	6.86	0.26		2.75	3.88	1.04
[1348]	OCEAN ISLAND	KERGUELEN / KERGUELEN ARCHIPELAGO / SHIELD STAGE	LORANCHET PENINSULA	-49	-49	69	69	SAE			s_12 [1348]	RHYOLITE [1348]									VOL					WR [1348]	72.08	0.3		14.76		1.63	1.38		0.74	0.46	0.05		4.96	4.15	0.27
[1348]	OCEAN ISLAND	KERGUELEN / KERGUELEN ARCHIPELAGO	RALLIER DU BATY PENINSULA	-48.55	-49.75	68.5	70.58	SAE			s_13 [1348]	TRACHYANDESITE [1348]									VOL					WR [1348]	52.23	0.37		21.19		5.56	1.9		7.21	4.19	0.12		2.44	4.25	0.52
[1348]	OCEAN ISLAND	KERGUELEN / KERGUELEN ARCHIPELAGO	COURBET PENINSULA	-48.55	-49.75	68.5	70.58	SAE			s_14 [1348]	TRACHYTE [1348]									VOL					WR [1348]	62.26	0.18		17.63		3.17	2.31		1.6	1.13	0.13		5.74	6.39	0.21
[1348]	OCEAN ISLAND	KERGUELEN / KERGUELEN ARCHIPELAGO	SOUTHEAST SHIELD	-48.55	-49.75	68.5	70.58	SAE			s_15 [1348]	TRACHYTE [1348]									VOL					WR [1348]	59.48	0.37		18.95		3.54	2.29		2.3	0.84	0.16		5.99	6	0.38
[1348]	OCEAN ISLAND	KERGUELEN / KERGUELEN ARCHIPELAGO / MOUNT ROSS		-49.58	-49.58	69.5	69.5	SAE			s_16 [1348]	TRACHYTE [1348]									VOL					WR [1348]	59.73	0.14		20.59		3.8	1.21		1.83	1.33	0.15		5.12	6.43	0.42
[1348]	OCEAN ISLAND	KERGUELEN / KERGUELEN ARCHIPELAGO	RALLIER DU BATY PENINSULA	-48.55	-49.75	68.5	70.58	SAE			s_17 [1348]	TRACHYTE [1348]									VOL					WR [1348]	62.2	0.3		18.51		3.18	2.16		1.42	0.88	0.16		5.37	6	0.33
[1348]	OCEAN ISLAND	KERGUELEN / KERGUELEN ARCHIPELAGO	LORANCHET SHIELD	-48.55	-49.75	68.5	70.58	SAE			s_19 [1348]	TRACHYTE [1348]									VOL					WR [1348]	57.75	0.59		17.68		5.04	2.03		3.58	3.81	0.15		3.68	5.28	0.4
[1348]	OCEAN ISLAND	KERGUELEN / KERGUELEN ARCHIPELAGO		-48.55	-49.75	68.5	70.58	SAE			s_20 [1348]	TRACHYTE [1348]									VOL					WR [1348]	60.67	0.24		19.24		3.49	1.86		1.82	1.08	0.15		5.48	6.21	0.36
[1348]	OCEAN ISLAND	KERGUELEN / KERGUELEN ARCHIPELAGO / MOUNT THOMPSON		-48.55	-49.75	68.5	70.58	SAE			s_21 [1348]	PHONOLITE [1348]									VOL					WR [1348]	56.95	0.29		20.42		2.77	1.9		1.76	1.05	0.15		6.92	7.84	0.23
[1345]	OCEAN ISLAND	KERGUELEN / KERGUELEN ARCHIPELAGO		-48.55	-49.75	68.5	70.58	SAE			s_KERG15G16 [1345]	BASALT [1345]									VOL					WR [1345]
[1345]	OCEAN ISLAND	KERGUELEN / KERGUELEN ARCHIPELAGO		-48.55	-49.75	68.5	70.58	SAE			s_KERG15233 [1345]	BASALT [1345]									VOL					WR [1345]
[973]	OCEAN ISLAND	KERGUELEN / FOCH / MOUNT BUREAU		-48.55	-49.75	68.5	70.58	SAE	60	60	s_GM92-58 [973]	BASALT, TRANSITIONAL [973]									VOL					WR [973]	51.08	3.29		13.26				13.57	8.29	4.47	0.2		0.88	2.94	0.39
[973]	OCEAN ISLAND	KERGUELEN / FOCH / MOUNT BUREAU		-48.55	-49.75	68.5	70.58	SAE	75	75	s_GM92-57 [973]	BASALT, TRANSITIONAL [973]									VOL					WR [973]	46.21	2.45		16.35				12.26	9.67	7.37	0.19		0.69	2.99	0.37
[973]	OCEAN ISLAND	KERGUELEN / FOCH / MOUNT BUREAU		-48.55	-49.75	68.5	70.58	SAE	80	80	s_GM92-56 [973]	BASALT, TRANSITIONAL [973]									VOL					WR [973]	51.41	3.2		13.18				13.06	8.3	4.64	0.24		0.83	2.97	0.39
[973]	OCEAN ISLAND	KERGUELEN / FOCH / MOUNT BUREAU		-48.55	-49.75	68.5	70.58	SAE	130	130	s_GM92-55 [973]	BASALT, TRANSITIONAL [973]									VOL					WR [973]	45.92	1.55		13.89				11.32	9.57	13.35	0.18		0.54	1.91	0.18
[973]	OCEAN ISLAND	KERGUELEN / FOCH / MOUNT BUREAU		-48.55	-49.75	68.5	70.58	SAE	130	130	s_GM92-54 [973]	BASALT, TRANSITIONAL [973]									VOL					WR [973]	51.31	3.17		13.53				12.59	8.46	4.88	0.2		1.05	2.96	0.38
[973]	OCEAN ISLAND	KERGUELEN / FOCH / MOUNT BUREAU		-48.55	-49.75	68.5	70.58	SAE	130	130	s_GM92-53 [973]	ANKARAMITE [973]									VOL					WR [973]	44.72	3.4		13.73				12.19	10.94	9.32	0.19		1.85	1.65	0.6
[973]	OCEAN ISLAND	KERGUELEN / FOCH / MOUNT BUREAU		-48.55	-49.75	68.5	70.58	SAE	150	150	s_GM92-51 [973]	BASALT, TRANSITIONAL [973]									VOL					WR [973]	46.4	1.6		13.84				11.36	9.59	12.96	0.18		0.54	2.1	0.19
[973]	OCEAN ISLAND	KERGUELEN / FOCH / MOUNT BUREAU		-48.55	-49.75	68.5	70.58	SAE	180	180	s_GM92-50 [973]	BASALT, TRANSITIONAL [973]									VOL					WR [973]	47.97	2.38		15.81				11.89	9.81	6.48	0.2		0.64	3.07	0.28
[973]	OCEAN ISLAND	KERGUELEN / FOCH / MOUNT BUREAU		-48.55	-49.75	68.5	70.58	SAE	300	300	s_GM92-45 [973]	BASALT, TRANSITIONAL [973]									VOL					WR [973]	51.12	3.78		12.89				13.08	8.09	4.26	0.22		1.32	2.93	0.53
[973]	OCEAN ISLAND	KERGUELEN / FOCH / MOUNT BUREAU		-48.55	-49.75	68.5	70.58	SAE	320	320	s_GM92-44 [973]	BASALT, TRANSITIONAL [973]									VOL					WR [973]	51.58	3.81		13.59				11.98	8.51	4.27	0.19		1.04	3.1	0.53
[973]	OCEAN ISLAND	KERGUELEN / FOCH / MOUNT BUREAU		-48.55	-49.75	68.5	70.58	SAE	330	330	s_GM92-43 [973]	BASALT, TRANSITIONAL [973]									VOL					WR [973]	49.1	3.49		14.28				12.69	9.91	5.12	0.19		0.63	2.72	0.44
[973]	OCEAN ISLAND	KERGUELEN / FOCH / MOUNT BUREAU		-48.55	-49.75	68.5	70.58	SAE	340	340	s_GM92-42 [973]	BASALT, TRANSITIONAL [973]									VOL					WR [973]	53.12	3.24		13.33				12.44	6.82	3.53	0.21		1.85	3.2	0.6
[973]	OCEAN ISLAND	KERGUELEN / FOCH / MOUNT BUREAU		-48.55	-49.75	68.5	70.58	SAE	350	350	s_GM92-41 [973]	BASALT, TRANSITIONAL [973]									VOL					WR [973]	50.05	3.37		13.7				12.63	9.48	4.99	0.2		0.77	2.88	0.43
[973]	OCEAN ISLAND	KERGUELEN / FOCH / MOUNT BUREAU		-48.55	-49.75	68.5	70.58	SAE	360	360	s_GM92-40 [973]	BASALT, TRANSITIONAL [973]									VOL					WR [973]	52.46	3.37		13.14				13.04	7.13	3.37	0.24		1.79	3.13	0.57
[973]	OCEAN ISLAND	KERGUELEN / FOCH / MOUNT BUREAU		-48.55	-49.75	68.5	70.58	SAE	400	400	s_GM92-39 [973]	BASALT, TRANSITIONAL [973]									VOL					WR [973]	50.91	3.61		13.39				12.71	8.63	4.67	0.19		1.23	2.9	0.44
[973]	OCEAN ISLAND	KERGUELEN / FOCH / MOUNT BUREAU		-48.55	-49.75	68.5	70.58	SAE	410	410	s_GM92-38 [973]	BASALT, TRANSITIONAL [973]									VOL					WR [973]	49.93	3.66		13.63				13.07	8.75	4.85	0.19		1.02	2.97	0.44
[973]	OCEAN ISLAND	KERGUELEN / FOCH / MOUNT BUREAU		-48.55	-49.75	68.5	70.58	SAE	440	440	s_GM92-37 [973]	BASALT, TRANSITIONAL [973]									VOL					WR [973]	50.59	3.63		13.31				13.1	8.44	4.7	0.22		1.06	2.96	0.46
[973]	OCEAN ISLAND	KERGUELEN / FOCH / MOUNT BUREAU		-48.55	-49.75	68.5	70.58	SAE	460	460	s_GM92-36 [973]	BASALT, TRANSITIONAL [973]									VOL					WR [973]	51.66	3.5		13.09				12.92	7.47	4.08	0.22		1.48	3.14	0.69
[973]	OCEAN ISLAND	KERGUELEN / FOCH / MOUNT BUREAU		-48.55	-49.75	68.5	70.58	SAE	460	460	s_GM92-35 [973]	BASALT, TRANSITIONAL [973]									VOL					WR [973]	51.67	3.52		13.17				12.92	7.41	3.96	0.21		1.51	3.09	0.69
[973]	OCEAN ISLAND	KERGUELEN / FOCH / MOUNT BUREAU		-48.55	-49.75	68.5	70.58	SAE	480	480	s_GM92-34 [973]	BASALT, TRANSITIONAL [973]									VOL					WR [973]	51.95	3.34		13.01				13.12	7.57	3.65	0.22		1.4	3.15	0.72
[973]	OCEAN ISLAND	KERGUELEN / FOCH / MOUNT BUREAU		-48.55	-49.75	68.5	70.58	SAE	510	510	s_GM92-33 [973]	BASALT, TRANSITIONAL [973]									VOL					WR [973]	51.05	3.44		13.53				12.45	8.74	4.95	0.17		1.11	2.64	0.39
[973]	OCEAN ISLAND	KERGUELEN / FOCH / MOUNT BUREAU		-48.55	-49.75	68.5	70.58	SAE	530	530	s_GM92-32 [973]	BASALT, TRANSITIONAL [973]									VOL					WR [973]	50.07	3.67		13				13.72	8.26	4.64	0.2		1.23	2.92	0.49
[5176]	OCEAN ISLAND	KERGUELEN / KERGUELEN ARCHIPELAGO / MOUNT CROZIER		-48.55	-49.75	68.5	70.58	SAE	978	978	s_OB93-111 [5176]	TRACHYBASALT [5176]	24800000 [5176]	24800000 [5176]							VOL			S		WR [5176]
[973]	OCEAN ISLAND	KERGUELEN / KERGUELEN ARCHIPELAGO / MOUNT RABOUILLERE	JOFFRE PENINSULA	-48.55	-49.75	68.5	70.58	SAE	40	40	s_GM92-152 [973]	BASALT, TRANSITIONAL [973]									VOL					WR [973]	51.52	3.78		12.85				13.05	7.76	3.95	0.21		1.72	3.01	0.54
[973]	OCEAN ISLAND	KERGUELEN / KERGUELEN ARCHIPELAGO / MOUNT RABOUILLERE	JOFFRE PENINSULA	-48.55	-49.75	68.5	70.58	SAE	50	50	s_GM92-151 [973]	BASALT, TRANSITIONAL [973]									VOL					WR [973]	51.71	3.78		12.84				13.07	7.77	3.83	0.21		1.68	3.09	0.54
[973]	OCEAN ISLAND	KERGUELEN / KERGUELEN ARCHIPELAGO / MOUNT RABOUILLERE	JOFFRE PENINSULA	-48.55	-49.75	68.5	70.58	SAE	60	60	s_GM92-150 [973]	BASALT, TRANSITIONAL [973]									VOL					WR [973]	50.84	3.82						12.47	8.4	4.37	0.2		1.18	3.1	0.54
[973]	OCEAN ISLAND	KERGUELEN / KERGUELEN ARCHIPELAGO / MOUNT RABOUILLERE	JOFFRE PENINSULA	-48.55	-49.75	68.5	70.58	SAE	70	70	s_GM92-149 [973]	BASALT, TRANSITIONAL [973]									VOL					WR [973]	50.77	3.96						12.3	8.99	4.43	0.18		0.9	3	0.56
[973]	OCEAN ISLAND	KERGUELEN / KERGUELEN ARCHIPELAGO / MOUNT RABOUILLERE	JOFFRE PENINSULA	-48.55	-49.75	68.5	70.58	SAE	110	110	s_GM92-147 [973]	BASALT, TRANSITIONAL [973]									VOL					WR [973]	51.06	3.63						13.52	7.98	4	0.22		1.49	2.97	0.49
[973]	OCEAN ISLAND	KERGUELEN / KERGUELEN ARCHIPELAGO / MOUNT RABOUILLERE	JOFFRE PENINSULA	-48.55	-49.75	68.5	70.58	SAE	120	120	s_GM92-146 [973]	BASALT, TRANSITIONAL [973]									VOL					WR [973]	48.87	1.97						10.89	11.2	5.64	0.18		0.34	2.91	0.2
[973]	OCEAN ISLAND	KERGUELEN / KERGUELEN ARCHIPELAGO / MOUNT RABOUILLERE	JOFFRE PENINSULA	-48.55	-49.75	68.5	70.58	SAE	170	170	s_GM92-143 [973]	BASALT, TRANSITIONAL [973]									VOL					WR [973]	51.17	3.58						12.85	8.14	4.24	0.2		1.37	3.15	0.47
[973]	OCEAN ISLAND	KERGUELEN / KERGUELEN ARCHIPELAGO / MOUNT RABOUILLERE	JOFFRE PENINSULA	-48.55	-49.75	68.5	70.58	SAE	185	185	s_GM92-142 [973]	BASALT, TRANSITIONAL [973]									VOL					WR [973]	51.1	3.55						13.48	8.07	4.09	0.22		1.15	3.27	0.62
[973]	OCEAN ISLAND	KERGUELEN / KERGUELEN ARCHIPELAGO / MOUNT RABOUILLERE	JOFFRE PENINSULA	-48.55	-49.75	68.5	70.58	SAE	200	200	s_GM92-141 [973]	BASALT, TRANSITIONAL [973]									VOL					WR [973]	50.08	2.68						12.04	9.42	5.63	0.17		0.73	3.07	0.52
[973]	OCEAN ISLAND	KERGUELEN / KERGUELEN ARCHIPELAGO / MOUNT RABOUILLERE	JOFFRE PENINSULA	-48.55	-49.75	68.5	70.58	SAE	210	210	s_GM92-140 [973]	BASALT, TRANSITIONAL [973]									VOL					WR [973]	49.88	3.68						14.31	8.33	4.36	0.21		0.94	2.98	0.46
[973]	OCEAN ISLAND	KERGUELEN / KERGUELEN ARCHIPELAGO / MOUNT RABOUILLERE	JOFFRE PENINSULA	-48.55	-49.75	68.5	70.58	SAE	240	240	s_GM92-139 [973]	BASALT, TRANSITIONAL [973]									VOL					WR [973]	58.62	1.82						9.6	5.03	2.49	0.2		2.5	3.88	0.68
[973]	OCEAN ISLAND	KERGUELEN / KERGUELEN ARCHIPELAGO / MOUNT RABOUILLERE	JOFFRE PENINSULA	-48.55	-49.75	68.5	70.58	SAE	260	260	s_GM92-138 [973]	BASALT, TRANSITIONAL [973]									VOL					WR [973]	58.98	1.81		13.87				9.22	4.64	2.67	0.17		2.63	3.83	0.69
[973]	OCEAN ISLAND	KERGUELEN / KERGUELEN ARCHIPELAGO / MOUNT RABOUILLERE	JOFFRE PENINSULA	-48.55	-49.75	68.5	70.58	SAE	270	270	s_GM92-137 [973]	BASALT, TRANSITIONAL [973]									VOL					WR [973]	52.14	3.57		13.26				13.02	7.44	3.46	0.19		1.76	3.31	0.56
[973]	OCEAN ISLAND	KERGUELEN / KERGUELEN ARCHIPELAGO / MOUNT RABOUILLERE	JOFFRE PENINSULA	-48.55	-49.75	68.5	70.58	SAE	280	280	s_GM92-136 [973]	BASALT, TRANSITIONAL [973]									VOL					WR [973]	51.75	3.32		13.18				12.82	7.82	4.27	0.21		1.51	2.94	0.43
[973]	OCEAN ISLAND	KERGUELEN / KERGUELEN ARCHIPELAGO / MOUNT RABOUILLERE	JOFFRE PENINSULA	-48.55	-49.75	68.5	70.58	SAE	310	310	s_GM92-134 [973]	BASALT, TRANSITIONAL [973]									VOL					WR [973]	51.74	3.39		13				13.23	8.15	4.11	0.21		0.76	3.25	0.42
[973]	OCEAN ISLAND	KERGUELEN / KERGUELEN ARCHIPELAGO / MOUNT RABOUILLERE	JOFFRE PENINSULA	-48.55	-49.75	68.5	70.58	SAE	350	350	s_GM92-133 [973]	BASALT, TRANSITIONAL [973]									VOL					WR [973]	50.03	3.68		13.21				13.66	8.45	4.45	0.19		1.26	2.96	0.5
[973]	OCEAN ISLAND	KERGUELEN / KERGUELEN ARCHIPELAGO / MOUNT RABOUILLERE	JOFFRE PENINSULA	-48.55	-49.75	68.5	70.58	SAE	355	355	s_GM92-132 [973]	BASALT, TRANSITIONAL [973]									VOL					WR [973]	50.61	3.61		13.04				13.34	8.31	4.38	0.22		1.38	2.97	0.47
[973]	OCEAN ISLAND	KERGUELEN / KERGUELEN ARCHIPELAGO / MOUNT RABOUILLERE	JOFFRE PENINSULA	-48.55	-49.75	68.5	70.58	SAE	360	360	s_GM92-131 [973]	BASALT, TRANSITIONAL [973]									VOL					WR [973]	50.66	3.89		13.25				13.12	8.63	4.25	0.2		0.94	3.14	0.51
[973]	OCEAN ISLAND	KERGUELEN / KERGUELEN ARCHIPELAGO / MOUNT RABOUILLERE	JOFFRE PENINSULA	-48.55	-49.75	68.5	70.58	SAE	370	370	s_GM92-130 [973]	BASALT, TRANSITIONAL [973]									VOL					WR [973]	49.72	3.27		13.92				12.87	9.47	5.19	0.2		0.71	2.75	0.4
[973]	OCEAN ISLAND	KERGUELEN / KERGUELEN ARCHIPELAGO / MOUNT RABOUILLERE	JOFFRE PENINSULA	-48.55	-49.75	68.5	70.58	SAE	390	390	s_GM92-128 [973]	BASALT, TRANSITIONAL [973]									VOL					WR [973]	50.6	3.84		13				13.33	8.36	4.34	0.22		1.08	2.94	0.5
[973]	OCEAN ISLAND	KERGUELEN / FOCH / MOUNT BUREAU	DIKE	-48.55	-49.75	68.5	70.58	SAE	145	145	s_GM93-334 [973]	BASALT, TRANSITIONAL [973]									VOL					WR [973]
[973]	OCEAN ISLAND	KERGUELEN / KERGUELEN ARCHIPELAGO	SOUTHEASTERN PROVINCE	-49.68	-49.68	70	70	SAE			s_LVLK-88 [973]	BASALT, TRANSITIONAL [973]									VOL					WR [973]
[1400]	OCEAN ISLAND	KERGUELEN / KERGUELEN ARCHIPELAGO	RALLIER DU BATY PENINSULA, VALLEE DE LA LONGUE ATTENTE	-48.55	-49.75	68.5	70.58	SAE			s_1 [1400]	TRACHYTE [1400]									VOL					WR [1400]	60.7	0.35		16.15		2.5	2.9		0.95	1.1	0.21		5.7	4.95	0.04		3.5	0.6
[1400]	OCEAN ISLAND	KERGUELEN / KERGUELEN ARCHIPELAGO	RALLIER DU BATY PENINSULA, VAL-ANDRE	-48.55	-49.75	68.5	70.58	SAE			s_1 [1400]	BASALT [1400]									VOL					WR [1400]	58.45	0.5		17.5		3.85	2.4		1.35	0.3	0.16		5.95	5.05	0.12		3.4	0.8
[847]	OCEAN ISLAND	KERGUELEN / KERGUELEN ARCHIPELAGO / MOUNT ROSS		-49.58	-49.58	69.5	69.5	SAE			s_128 [847]	TRACHYBASALT [847]								FLUIDAL [847]	VOL					WR [847]	48.46	2.82		17.4				10.46	9.75	4.02	0.17		1.66	3.47	0.71
[847]	OCEAN ISLAND	KERGUELEN / KERGUELEN ARCHIPELAGO / MOUNT ROSS		-49.58	-49.58	69.5	69.5	SAE			s_97 [847]	TRACHYANDESITE, BASALTIC [847]								FLUIDAL [847]	VOL					WR [847]	50.52	2.24		18.51				8.48	7.13	3.19	0.17		3.21	4.37	0.98
[847]	OCEAN ISLAND	KERGUELEN / KERGUELEN ARCHIPELAGO / MOUNT ROSS		-49.58	-49.58	69.5	69.5	SAE			s_57 [847]	TRACHYANDESITE, BASALTIC [847]								FLUIDAL [847]	VOL					WR [847]	49.6	2.38		19.05				8.4	7.81	2.95	0.15		2.91	4.46	1.02
[847]	OCEAN ISLAND	KERGUELEN / KERGUELEN ARCHIPELAGO / MOUNT ROSS		-49.58	-49.58	69.5	69.5	SAE			s_48 [847]	TRACHYANDESITE, BASALTIC [847]								FLUIDAL [847]	VOL					WR [847]	51.19	2.2		18.04				8.62	6.47	2.86	0.17		3.65	4.59	0.88
[847]	OCEAN ISLAND	KERGUELEN / KERGUELEN ARCHIPELAGO / MOUNT ROSS		-49.58	-49.58	69.5	69.5	SAE			s_54 [847]	TRACHYANDESITE, BASALTIC [847]								FLUIDAL [847]	VOL					WR [847]	51.87	2		19.47				7.77	7.36	2.4	0.16		2.16	5.03	0.97
[847]	OCEAN ISLAND	KERGUELEN / KERGUELEN ARCHIPELAGO / MOUNT ROSS		-49.58	-49.58	69.5	69.5	SAE			s_130 [847]	TRACHYANDESITE, BASALTIC [847]								FLUIDAL [847]	VOL					WR [847]	52.28	1.82		19.12				7.81	6.34	2.33	0.17		3.52	4.56	0.86
[847]	OCEAN ISLAND	KERGUELEN / KERGUELEN ARCHIPELAGO / MOUNT ROSS		-49.58	-49.58	69.5	69.5	SAE			s_142 [847]	TRACHYANDESITE [847]								FLUIDAL [847]	VOL					WR [847]	55	1.57		17.87				7.57	4.57	1.88	0.18		4.58	5.03	0.6
[847]	OCEAN ISLAND	KERGUELEN / KERGUELEN ARCHIPELAGO / MOUNT ROSS		-49.58	-49.58	69.5	69.5	SAE			s_38 [847]	TRACHYANDESITE [847]								FLUIDAL [847]	VOL					WR [847]	55.31	1.31		17.84				7.81	4.18	1.73	0.19		4.63	5.13	0.62
[847]	OCEAN ISLAND	KERGUELEN / KERGUELEN ARCHIPELAGO / MOUNT ROSS		-49.58	-49.58	69.5	69.5	SAE			s_144 [847]	TRACHYANDESITE [847]								FLUIDAL [847]	VOL					WR [847]	55.47	1.27		19.45				6.04	4.56	1.43	0.14		4.37	5.17	0.59
[847]	OCEAN ISLAND	KERGUELEN / KERGUELEN ARCHIPELAGO / MOUNT ROSS		-49.58	-49.58	69.5	69.5	SAE			s_107 [847]	TRACHYANDESITE [847]								FLUIDAL [847]	VOL					WR [847]	56.61	1.09		17.92				7.01	3.06	1.27	0.18		5.61	5.7	0.43
[847]	OCEAN ISLAND	KERGUELEN / KERGUELEN ARCHIPELAGO / MOUNT ROSS		-49.58	-49.58	69.5	69.5	SAE			s_44 [847]	TRACHYTE [847]								FLUIDAL [847]	VOL					WR [847]	60.44	0.49		18.1				4.98	2.03	0.59	0.17		5.91	6.24	0.15
[847]	OCEAN ISLAND	KERGUELEN / KERGUELEN ARCHIPELAGO / MOUNT ROSS		-49.58	-49.58	69.5	69.5	SAE			s_98 [847]	TRACHYTE [847]								FLUIDAL [847]	VOL					WR [847]	61.05	0.49		18.12				4.66	1.68	0.43	0.16		6.35	6.18	0.11
[847]	OCEAN ISLAND	KERGUELEN / KERGUELEN ARCHIPELAGO / MOUNT ROSS		-49.58	-49.58	69.5	69.5	SAE			s_131 [847]	TRACHYTE [847]								FLUIDAL [847]	VOL					WR [847]	60.32	0.41		18.14				5.37	1.93	0.41	0.17		6.07	6.06	0.13
[847]	OCEAN ISLAND	KERGUELEN / KERGUELEN ARCHIPELAGO / MOUNT ROSS		-49.58	-49.58	69.5	69.5	SAE			s_29 [847]	TRACHYTE [847]								FLUIDAL [847]	VOL					WR [847]	61.1	0.39		18.02				5.58	2.09	0.38	0.18		5.92	6.28	0.13
[847]	OCEAN ISLAND	KERGUELEN / KERGUELEN ARCHIPELAGO / MOUNT ROSS		-49.58	-49.58	69.5	69.5	SAE			s_106 [847]	TRACHYTE [847]								FLUIDAL [847]	VOL					WR [847]	60.56	0.27		18.27				5.08	1.72	0.28	0.18		5.92	6.82	0.07
[847]	OCEAN ISLAND	KERGUELEN / KERGUELEN ARCHIPELAGO / MOUNT ROSS		-49.58	-49.58	69.5	69.5	SAE			s_108 [847]	TRACHYTE [847]								FLUIDAL [847]	VOL					WR [847]	61.2	0.24		18.62				4.51	1.3	0.21	0.16		6.08	6.76	0.051
[1398]	OCEAN ISLAND	KERGUELEN / KERGUELEN ARCHIPELAGO / MONT DU COMMANDANT	RALLIER DU BATY PENINSULA	-48.55	-49.75	68.5	70.58	SAE			s_15M9 [1398]	BASALT, ANDESITIC [1398]									VOL					WR [1398]	47.33	1.08		17.78		6.92	3.81		8.58	4.73	0.2		1.11	3.74	0.92		1.48	1.8
[1398]	OCEAN ISLAND	KERGUELEN / KERGUELEN ARCHIPELAGO	RALLIER DU BATY PENINSULA, VAL-ANDRE	-48.55	-49.75	68.5	70.58	SAE			s_60 [1398]	ANDESITE [1398]									VOL					WR [1398]	50.81	0.2		22.47		5.69	1.23		6.71	3.68	0.11		2.19	3.97	0.38		1.31	1.4
[1398]	OCEAN ISLAND	KERGUELEN / KERGUELEN ARCHIPELAGO	RALLIER DU BATY PENINSULA, CAP BOURBON	-48.55	-49.75	68.5	70.58	SAE			s_15R1 [1398]	TRACHYTE, ALKALINE [1398]									VOL					WR [1398]	60.8	0.32		17.29		3.92	0.71		0.29	1.03	0.19		5.5	7.1	0.52		1	1.22
[1398]	OCEAN ISLAND	KERGUELEN / KERGUELEN ARCHIPELAGO	RALLIER DU BATY PENINSULA, VAL-ANDRE	-48.55	-49.75	68.5	70.58	SAE			s_A30 [1398]	TRACHYTE, ALKALINE [1398]									VOL					WR [1398]	63.12	0.44		14.98		3.45	2.61		1.23	0.36			4.59	5.92			0.35	2.7
[1398]	OCEAN ISLAND	KERGUELEN / KERGUELEN ARCHIPELAGO	RALLIER DU BATY PENINSULA, CAP BOURBON	-48.55	-49.75	68.5	70.58	SAE			s_XXI [1398]	TRACHYTE, ALKALINE [1398]									VOL					WR [1398]	57.02	0.11		19.61			4.29		0.2	0.53			4.92	4.61	0.39		5.38	0.81
[7525]	OCEAN ISLAND	KERGUELEN / KERGUELEN ARCHIPELAGO	ANSE DU NOTOTHENIA	-49.35	-49.35	69.89	69.89	SAE			s_AG99-123 [7525]	PICRITE [7525]	24000000 [7525]	25000000 [7525]							VOL			F		WR [7525]	46.73	1.95		11.18				11.98	9.9	13.19	0.18		0.64	2.19	0.22
[7525]	OCEAN ISLAND	KERGUELEN / KERGUELEN ARCHIPELAGO / MONT TRAPEZE	COURBET PENINSULA	-49.3	-49.3	70.06	70.06	SAE			s_AG99-182 [7525]	BASALT, TRANSITIONAL [7525]									VOL			F		WR [7525]	48.46	2.38		13.12				10.87	9.28	10.03	0.16		1.15	2.99	0.37
[7525]	OCEAN ISLAND	KERGUELEN / KERGUELEN ARCHIPELAGO	ANSE DU NOTOTHENIA	-49.35	-49.35	69.89	69.89	SAE			s_AG99-121 [7525]	BASALT, TRANSITIONAL [7525]	24000000 [7525]	25000000 [7525]							VOL			F		WR [7525]	46.98	2.79		13.92				11.91	9.39	9.87	0.22		1.06	2.24	0.36
[7525]	OCEAN ISLAND	KERGUELEN / KERGUELEN ARCHIPELAGO	ANSE DU NOTOTHENIA	-49.35	-49.35	69.89	69.89	SAE			s_AG99-122 [7525]	BASALT, TRANSITIONAL [7525]	24000000 [7525]	25000000 [7525]							VOL			F		WR [7525]	47.34	2.49		14.05				11.63	9.67	9.59	0.18		1.04	2.71	0.33
[7525]	OCEAN ISLAND	KERGUELEN / KERGUELEN ARCHIPELAGO	ARMOR	-49.48	-49.48	69.67	69.67	SAE			s_AG99-42 [7525]	BASALT, ALKALINE [7525]	24000000 [7525]	25000000 [7525]							VOL			F		WR [7525]	47.11	2.68		14.6				10.98	9.51	9.07	0.16		1.39	2.88	0.51
[7525]	OCEAN ISLAND	KERGUELEN / KERGUELEN ARCHIPELAGO	ARMOR	-49.48	-49.48	69.67	69.67	SAE			s_AG99-43 [7525]	BASALT, ALKALINE [7525]	24000000 [7525]	25000000 [7525]							VOL			F		WR [7525]	47.02	2.68		14.62				11.01	9.46	8.79	0.16		1.33	3.02	0.49
[7525]	OCEAN ISLAND	KERGUELEN / KERGUELEN ARCHIPELAGO	ANSE DU NOTOTHENIA	-49.35	-49.35	69.89	69.89	SAE			s_AG99-127 [7525]	BASALT, ALKALINE [7525]	24000000 [7525]	25000000 [7525]							VOL			F		WR [7525]	46.57	2.99		14.77				11.63	9.84	7.75	0.18		1.52	3.02	0.61
[7525]	OCEAN ISLAND	KERGUELEN / KERGUELEN ARCHIPELAGO	JEANNE D^ARC PENINSULA, RAVIN DU CHARBON	-49.55	-49.55	69.82	69.82	SAE			s_AG99-153 [7525]	BASALT, ALKALINE [7525]									VOL			E		WR [7525]	44.14	2.43		12.43				10.1	19.48	6.33	0.57		0.87	2.46	0.33
[7525]	OCEAN ISLAND	KERGUELEN / KERGUELEN ARCHIPELAGO	ANSE DU NOTOTHENIA	-49.35	-49.35	69.89	69.89	SAE			s_AG99-124 [7525]	BASALT, ALKALINE [7525]	24000000 [7525]	25000000 [7525]							VOL			F		WR [7525]	45.79	3.65		15.38				12.82	10.01	5.86	0.19		1.46	2.9	0.51
[7525]	OCEAN ISLAND	KERGUELEN / KERGUELEN ARCHIPELAGO	ANSE DU NOTOTHENIA	-49.35	-49.35	69.89	69.89	SAE			s_AG99-123 [7525]	PICRITE [7525]	24000000 [7525]	25000000 [7525]							VOL			F		WR [7525]
[7525]	OCEAN ISLAND	KERGUELEN / KERGUELEN ARCHIPELAGO	ANSE DU NOTOTHENIA	-49.35	-49.35	69.89	69.89	SAE			s_AG99-121 [7525]	BASALT, TRANSITIONAL [7525]	24000000 [7525]	25000000 [7525]							VOL			F		WR [7525]
[7525]	OCEAN ISLAND	KERGUELEN / KERGUELEN ARCHIPELAGO	ANSE DU NOTOTHENIA	-49.35	-49.35	69.89	69.89	SAE			s_AG99-121 [7525]	BASALT, TRANSITIONAL [7525]	24000000 [7525]	25000000 [7525]							VOL			F		WR [7525]
[7525]	OCEAN ISLAND	KERGUELEN / KERGUELEN ARCHIPELAGO	ANSE DU NOTOTHENIA	-49.35	-49.35	69.89	69.89	SAE			s_AG99-121 [7525]	BASALT, TRANSITIONAL [7525]	24000000 [7525]	25000000 [7525]							VOL			F		WR [7525]
[1006]	OCEAN ISLAND	KERGUELEN / KERGUELEN ARCHIPELAGO	JEANNE D^ARC PENINSULA	-48.55	-49.75	68.5	70.58	SAE			s_ARC215 [1006]	TRACHYBASALT [1006]			LOWER [1006]	MIOCENE [1006]					VOL					WR [1006]	47.86	2.71		15.13				10.89	9.41	5.72	0.16		1.35	3.24	0.41
[990]	OCEAN ISLAND	KERGUELEN / KERGUELEN ARCHIPELAGO	JEANNE D^ARC PENINSULA	-48.55	-49.75	68.5	70.58	SAE			s_3309 [990]	PHONOLITE [990]	8400000 [990]	8400000 [990]							VOL					WR [990]
[990]	OCEAN ISLAND	KERGUELEN / KERGUELEN ARCHIPELAGO / SHIELD STAGE	LORANCHET PENINSULA	-49	-49	69	69	SAE			s_3311 [990]	TRACHYTE [990]	15000000 [990]	15000000 [990]							VOL					WR [990]
[990]	OCEAN ISLAND	KERGUELEN / KERGUELEN ARCHIPELAGO	RALLIER DU BATY PENINSULA	-48.55	-49.75	68.5	70.58	SAE			s_2619 [990]	TRACHYTE [990]									VOL					WR [990]
[990]	OCEAN ISLAND	KERGUELEN / KERGUELEN ARCHIPELAGO / SHIELD STAGE	LORANCHET PENINSULA	-49	-49	69	69	SAE			s_3311 [990]	TRACHYTE [990]	15000000 [990]	15000000 [990]							VOL					WR [990]
[990]	OCEAN ISLAND	KERGUELEN / KERGUELEN ARCHIPELAGO / SHIELD STAGE	LORANCHET PENINSULA	-49	-49	69	69	SAE			s_3320 [990]	RHYOLITE [990]									VOL					WR [990]
[990]	OCEAN ISLAND	KERGUELEN / KERGUELEN ARCHIPELAGO	RONARC^H PENINSULA	-48.55	-49.75	68.5	70.58	SAE			s_3321 [990]	PHONOLITE [990]									VOL					WR [990]
[990]	OCEAN ISLAND	KERGUELEN / KERGUELEN ARCHIPELAGO / SHIELD STAGE	LORANCHET PENINSULA	-49	-49	69	69	SAE			s_3311 [990]	TRACHYTE [990]	15000000 [990]	15000000 [990]							VOL					WR [990]
[986]	OCEAN ISLAND	KERGUELEN / KERGUELEN ARCHIPELAGO		-48.55	-49.75	68.5	70.58	SAE			s_15A4 [986]	BASALT, ALKALINE [986]									VOL					WR [986]
[986]	OCEAN ISLAND	KERGUELEN / KERGUELEN ARCHIPELAGO		-48.55	-49.75	68.5	70.58	SAE			s_15A8 [986]	BASALT, ALKALINE [986]									VOL					WR [986]
[986]	OCEAN ISLAND	KERGUELEN / KERGUELEN ARCHIPELAGO		-48.55	-49.75	68.5	70.58	SAE			s_15175 [986]	BASALT, ALKALINE [986]									VOL					WR [986]
[986]	OCEAN ISLAND	KERGUELEN / KERGUELEN ARCHIPELAGO		-48.55	-49.75	68.5	70.58	SAE			s_15172 [986]	BASALT, ALKALINE [986]									VOL					WR [986]
[986]	OCEAN ISLAND	KERGUELEN / KERGUELEN ARCHIPELAGO		-48.55	-49.75	68.5	70.58	SAE			s_15D5 [986]	BASALT, ALKALINE [986]									VOL					WR [986]
[986]	OCEAN ISLAND	KERGUELEN / KERGUELEN ARCHIPELAGO		-48.55	-49.75	68.5	70.58	SAE			s_15M21 [986]	BASALT, ALKALINE [986]									VOL					WR [986]
[986]	OCEAN ISLAND	KERGUELEN / KERGUELEN ARCHIPELAGO		-48.55	-49.75	68.5	70.58	SAE			s_15N2 [986]	BASALT, ALKALINE [986]									VOL					WR [986]
[986]	OCEAN ISLAND	KERGUELEN / KERGUELEN ARCHIPELAGO		-48.55	-49.75	68.5	70.58	SAE			s_15N7 [986]	BASALT, ALKALINE [986]									VOL					WR [986]
[986]	OCEAN ISLAND	KERGUELEN / KERGUELEN ARCHIPELAGO		-48.55	-49.75	68.5	70.58	SAE			s_15N9 [986]	BASALT, ALKALINE [986]									VOL					WR [986]
[986]	OCEAN ISLAND	KERGUELEN / KERGUELEN ARCHIPELAGO		-48.55	-49.75	68.5	70.58	SAE			s_15N10 [986]	BASALT, ALKALINE [986]									VOL					WR [986]
[986]	OCEAN ISLAND	KERGUELEN / KERGUELEN ARCHIPELAGO		-48.55	-49.75	68.5	70.58	SAE			s_15N13 [986]	BASALT, ALKALINE [986]									VOL					WR [986]
[986]	OCEAN ISLAND	KERGUELEN / KERGUELEN ARCHIPELAGO		-48.55	-49.75	68.5	70.58	SAE			s_15N14 [986]	BASALT, ALKALINE [986]									VOL					WR [986]
[986]	OCEAN ISLAND	KERGUELEN / KERGUELEN ARCHIPELAGO		-48.55	-49.75	68.5	70.58	SAE			s_15N15 [986]	BASALT, ALKALINE [986]									VOL					WR [986]
[986]	OCEAN ISLAND	KERGUELEN / KERGUELEN ARCHIPELAGO		-48.55	-49.75	68.5	70.58	SAE			s_15M3 [986]	BASALT, ALKALINE [986]									VOL					WR [986]
[986]	OCEAN ISLAND	KERGUELEN / KERGUELEN ARCHIPELAGO		-48.55	-49.75	68.5	70.58	SAE			s_15M5 [986]	BASALT, ALKALINE [986]									VOL					WR [986]
[986]	OCEAN ISLAND	KERGUELEN / KERGUELEN ARCHIPELAGO		-48.55	-49.75	68.5	70.58	SAE			s_15M6 [986]	BASALT, ALKALINE [986]									VOL					WR [986]
[986]	OCEAN ISLAND	KERGUELEN / KERGUELEN ARCHIPELAGO		-48.55	-49.75	68.5	70.58	SAE			s_15M8 [986]	BASALT, ALKALINE [986]									VOL					WR [986]
[986]	OCEAN ISLAND	KERGUELEN / KERGUELEN ARCHIPELAGO		-48.55	-49.75	68.5	70.58	SAE			s_15T15 [986]	BASANITE [986]									VOL					WR [986]
[986]	OCEAN ISLAND	KERGUELEN / KERGUELEN ARCHIPELAGO		-48.55	-49.75	68.5	70.58	SAE			s_15T18 [986]	BASANITE [986]									VOL					WR [986]
[986]	OCEAN ISLAND	KERGUELEN / KERGUELEN ARCHIPELAGO		-48.55	-49.75	68.5	70.58	SAE			s_15T19 [986]	BASANITE [986]									VOL					WR [986]
[986]	OCEAN ISLAND	KERGUELEN / KERGUELEN ARCHIPELAGO		-48.55	-49.75	68.5	70.58	SAE			s_RH5 [986]	BASANITE [986]									VOL					WR [986]
[986]	OCEAN ISLAND	KERGUELEN / KERGUELEN ARCHIPELAGO		-48.55	-49.75	68.5	70.58	SAE			s_15S35 [986]	BASANITE [986]									VOL					WR [986]
[986]	OCEAN ISLAND	KERGUELEN / KERGUELEN ARCHIPELAGO		-48.55	-49.75	68.5	70.58	SAE			s_15S41 [986]	BASANITE [986]									VOL					WR [986]
[986]	OCEAN ISLAND	KERGUELEN / KERGUELEN ARCHIPELAGO		-48.55	-49.75	68.5	70.58	SAE			s_15S3 [986]	BASANITE [986]									VOL					WR [986]
[986]	OCEAN ISLAND	KERGUELEN / KERGUELEN ARCHIPELAGO		-48.55	-49.75	68.5	70.58	SAE			s_15S4 [986]	BASANITE [986]									VOL					WR [986]
[986]	OCEAN ISLAND	KERGUELEN / KERGUELEN ARCHIPELAGO		-48.55	-49.75	68.5	70.58	SAE			s_15E8 [986]	TRACHYTE, QUARTZ [986]									VOL					WR [986]
[986]	OCEAN ISLAND	KERGUELEN / KERGUELEN ARCHIPELAGO		-48.55	-49.75	68.5	70.58	SAE			s_15320 [986]	TRACHYTE, QUARTZ [986]									VOL					WR [986]
[986]	OCEAN ISLAND	KERGUELEN / KERGUELEN ARCHIPELAGO		-48.55	-49.75	68.5	70.58	SAE			s_15E4 [986]	TRACHYTE, QUARTZ [986]									VOL					WR [986]
[986]	OCEAN ISLAND	KERGUELEN / KERGUELEN ARCHIPELAGO		-48.55	-49.75	68.5	70.58	SAE			s_15C2 [986]	TRACHYTE, QUARTZ [986]									VOL					WR [986]
[986]	OCEAN ISLAND	KERGUELEN / KERGUELEN ARCHIPELAGO		-48.55	-49.75	68.5	70.58	SAE			s_15F6 [986]	TRACHYTE, QUARTZ [986]									VOL					WR [986]
[986]	OCEAN ISLAND	KERGUELEN / KERGUELEN ARCHIPELAGO		-48.55	-49.75	68.5	70.58	SAE			s_15A3 [986]	TRACHYTE, QUARTZ [986]									VOL					WR [986]
[986]	OCEAN ISLAND	KERGUELEN / KERGUELEN ARCHIPELAGO		-48.55	-49.75	68.5	70.58	SAE			s_15C4 [986]	TRACHYTE, QUARTZ [986]									VOL					WR [986]
[986]	OCEAN ISLAND	KERGUELEN / KERGUELEN ARCHIPELAGO		-48.55	-49.75	68.5	70.58	SAE			s_15237 [986]	TRACHYTE, QUARTZ [986]									VOL					WR [986]
[986]	OCEAN ISLAND	KERGUELEN / KERGUELEN ARCHIPELAGO		-48.55	-49.75	68.5	70.58	SAE			s_15S33 [986]	TRACHYTE, QUARTZ [986]									VOL					WR [986]
[986]	OCEAN ISLAND	KERGUELEN / KERGUELEN ARCHIPELAGO		-48.55	-49.75	68.5	70.58	SAE			s_15R16 [986]	TRACHYTE, QUARTZ [986]									VOL					WR [986]
[986]	OCEAN ISLAND	KERGUELEN / KERGUELEN ARCHIPELAGO		-48.55	-49.75	68.5	70.58	SAE			s_15G18 [986]	TRACHYTE, QUARTZ [986]									VOL					WR [986]
[986]	OCEAN ISLAND	KERGUELEN / KERGUELEN ARCHIPELAGO		-48.55	-49.75	68.5	70.58	SAE			s_15L9 [986]	TRACHYTE, QUARTZ [986]									VOL					WR [986]
[986]	OCEAN ISLAND	KERGUELEN / KERGUELEN ARCHIPELAGO		-48.55	-49.75	68.5	70.58	SAE			s_17LP3 [986]	TRACHYTE, QUARTZ [986]									VOL					WR [986]
[986]	OCEAN ISLAND	KERGUELEN / KERGUELEN ARCHIPELAGO		-48.55	-49.75	68.5	70.58	SAE			s_15K10 [986]	TRACHYTE, QUARTZ [986]									VOL					WR [986]
[986]	OCEAN ISLAND	KERGUELEN / KERGUELEN ARCHIPELAGO		-48.55	-49.75	68.5	70.58	SAE			s_15T3 [986]	TRACHYTE, QUARTZ [986]									VOL					WR [986]
[986]	OCEAN ISLAND	KERGUELEN / KERGUELEN ARCHIPELAGO		-48.55	-49.75	68.5	70.58	SAE			s_15R10 [986]	TRACHYTE, QUARTZ [986]									VOL					WR [986]
[986]	OCEAN ISLAND	KERGUELEN / KERGUELEN ARCHIPELAGO		-48.55	-49.75	68.5	70.58	SAE			s_15R2 [986]	TRACHYTE, QUARTZ [986]									VOL					WR [986]
[986]	OCEAN ISLAND	KERGUELEN / KERGUELEN ARCHIPELAGO		-48.55	-49.75	68.5	70.58	SAE			s_15R1 [986]	TRACHYTE, QUARTZ [986]									VOL					WR [986]
[986]	OCEAN ISLAND	KERGUELEN / KERGUELEN ARCHIPELAGO		-48.55	-49.75	68.5	70.58	SAE			s_15K3 [986]	TRACHYTE, PHONOLITIC, NEPHELINE [986]									VOL					WR [986]
[986]	OCEAN ISLAND	KERGUELEN / KERGUELEN ARCHIPELAGO		-48.55	-49.75	68.5	70.58	SAE			s_15K5 [986]	TRACHYTE, PHONOLITIC, NEPHELINE [986]									VOL					WR [986]
[986]	OCEAN ISLAND	KERGUELEN / KERGUELEN ARCHIPELAGO		-48.55	-49.75	68.5	70.58	SAE			s_15G11 [986]	TRACHYTE, PHONOLITIC, NEPHELINE [986]									VOL					WR [986]
[986]	OCEAN ISLAND	KERGUELEN / KERGUELEN ARCHIPELAGO		-48.55	-49.75	68.5	70.58	SAE			s_15T9 [986]	TRACHYTE, PHONOLITIC, NEPHELINE [986]									VOL					WR [986]
[986]	OCEAN ISLAND	KERGUELEN / KERGUELEN ARCHIPELAGO		-48.55	-49.75	68.5	70.58	SAE			s_15T7 [986]	TRACHYTE, PHONOLITIC, NEPHELINE [986]									VOL					WR [986]
[986]	OCEAN ISLAND	KERGUELEN / KERGUELEN ARCHIPELAGO		-48.55	-49.75	68.5	70.58	SAE			s_15G4 [986]	TRACHYTE, PHONOLITIC, NEPHELINE [986]									VOL					WR [986]
[986]	OCEAN ISLAND	KERGUELEN / KERGUELEN ARCHIPELAGO		-48.55	-49.75	68.5	70.58	SAE			s_15T6 [986]	TRACHYTE, PHONOLITIC, NEPHELINE [986]									VOL					WR [986]
[986]	OCEAN ISLAND	KERGUELEN / KERGUELEN ARCHIPELAGO		-48.55	-49.75	68.5	70.58	SAE			s_15T10 [986]	TRACHYTE, PHONOLITIC, NEPHELINE [986]									VOL					WR [986]
[986]	OCEAN ISLAND	KERGUELEN / KERGUELEN ARCHIPELAGO		-48.55	-49.75	68.5	70.58	SAE			s_15T1 [986]	TRACHYTE, PHONOLITIC, NEPHELINE [986]									VOL					WR [986]
[986]	OCEAN ISLAND	KERGUELEN / KERGUELEN ARCHIPELAGO		-48.55	-49.75	68.5	70.58	SAE			s_15T12 [986]	TRACHYTE, PHONOLITIC, NEPHELINE [986]									VOL					WR [986]
[986]	OCEAN ISLAND	KERGUELEN / KERGUELEN ARCHIPELAGO		-48.55	-49.75	68.5	70.58	SAE			s_15L4 [986]	TRACHYTE, PHONOLITIC, NEPHELINE [986]									VOL					WR [986]
[986]	OCEAN ISLAND	KERGUELEN / KERGUELEN ARCHIPELAGO		-48.55	-49.75	68.5	70.58	SAE			s_15L5 [986]	TRACHYTE, PHONOLITIC, NEPHELINE [986]									VOL					WR [986]
[986]	OCEAN ISLAND	KERGUELEN / KERGUELEN ARCHIPELAGO		-48.55	-49.75	68.5	70.58	SAE			s_15K7 [986]	TRACHYTE, PHONOLITIC, NEPHELINE [986]									VOL					WR [986]
[986]	OCEAN ISLAND	KERGUELEN / KERGUELEN ARCHIPELAGO		-48.55	-49.75	68.5	70.58	SAE			s_15K1 [986]	TRACHYTE, PHONOLITIC, NEPHELINE [986]									VOL					WR [986]
[986]	OCEAN ISLAND	KERGUELEN / KERGUELEN ARCHIPELAGO		-48.55	-49.75	68.5	70.58	SAE			s_15K4 [986]	TRACHYTE, PHONOLITIC, NEPHELINE [986]									VOL					WR [986]
[986]	OCEAN ISLAND	KERGUELEN / KERGUELEN ARCHIPELAGO		-48.55	-49.75	68.5	70.58	SAE			s_15M20 [986]	TRACHYTE, PHONOLITIC, NEPHELINE [986]									VOL					WR [986]
[986]	OCEAN ISLAND	KERGUELEN / KERGUELEN ARCHIPELAGO		-48.55	-49.75	68.5	70.58	SAE			s_15G15 [986]	TRACHYTE, PHONOLITIC, NEPHELINE [986]									VOL					WR [986]
[986]	OCEAN ISLAND	KERGUELEN / KERGUELEN ARCHIPELAGO		-48.55	-49.75	68.5	70.58	SAE			s_15T5 [986]	TRACHYTE, PHONOLITIC, NEPHELINE [986]									VOL					WR [986]
[986]	OCEAN ISLAND	KERGUELEN / KERGUELEN ARCHIPELAGO		-48.55	-49.75	68.5	70.58	SAE			s_15R7 [986]	TRACHYTE, PHONOLITIC, NEPHELINE [986]									VOL					WR [986]
[1634]	OCEAN ISLAND	KERGUELEN / KERGUELEN ARCHIPELAGO	JEANNE D^ARC PENINSULA, RAVIN DU CHARBON, UNIT 1	-48.55	-49.75	68.5	70.58	SAE			s_674 [1634]	TRACHYBASALT [1634]									VOL					WR [1634]	48.47	3.96		15.64				9.56	10.91	3.75	0.34		2.09	3.55	0.6
[1634]	OCEAN ISLAND	KERGUELEN / KERGUELEN ARCHIPELAGO	JEANNE D^ARC PENINSULA, RAVIN DU CHARBON, UNIT 1	-48.55	-49.75	68.5	70.58	SAE			s_675 [1634]	BASALT, ALKALINE [1634]									VOL					WR [1634]	47.79	3.25		15.68				11.9	9.3	5.65	0.17		1.29	3.06	0.42
[1634]	OCEAN ISLAND	KERGUELEN / KERGUELEN ARCHIPELAGO	JEANNE D^ARC PENINSULA, RAVIN DU CHARBON, UNIT 1	-48.55	-49.75	68.5	70.58	SAE			s_677 [1634]	BASALT, ALKALINE [1634]									VOL					WR [1634]	48.02	3.2		15.58				12.1	9.5	5.28	0.18		1.38	3.18	0.44
[1634]	OCEAN ISLAND	KERGUELEN / KERGUELEN ARCHIPELAGO	JEANNE D^ARC PENINSULA, RAVIN DU CHARBON, UNIT 1	-48.55	-49.75	68.5	70.58	SAE			s_678 [1634]	BASALT, ALKALINE [1634]									VOL					WR [1634]	47.9	3.18		15.56				11.94	9.53	5.46	0.18		1.33	3.1	0.42
[1634]	OCEAN ISLAND	KERGUELEN / KERGUELEN ARCHIPELAGO	JEANNE D^ARC PENINSULA, RAVIN DU CHARBON, UNIT 1	-48.55	-49.75	68.5	70.58	SAE			s_679 [1634]	BASALT, ALKALINE [1634]									VOL					WR [1634]	47.83	3.11		15.65				11.93	9.31	5.76	0.18		1.33	3.05	0.43
[1634]	OCEAN ISLAND	KERGUELEN / KERGUELEN ARCHIPELAGO	JEANNE D^ARC PENINSULA, RAVIN DU CHARBON, UNIT 1	-48.55	-49.75	68.5	70.58	SAE			s_680 [1634]	BASALT, ALKALINE [1634]									VOL					WR [1634]	48.13	3.14		15.77				11.64	9.68	5.56	0.2		1.32	3.03	0.43
[1634]	OCEAN ISLAND	KERGUELEN / KERGUELEN ARCHIPELAGO	JEANNE D^ARC PENINSULA, RAVIN DU CHARBON, UNIT 1	-48.55	-49.75	68.5	70.58	SAE			s_681 [1634]	BASALT, ALKALINE [1634]									VOL					WR [1634]	47.67	3.09		15.57				11.94	9.58	5.91	0.18		1.3	2.92	0.42
[1634]	OCEAN ISLAND	KERGUELEN / KERGUELEN ARCHIPELAGO	JEANNE D^ARC PENINSULA, RAVIN DU CHARBON, PORT JEANNE D^ARC, UNIT 2	-48.55	-49.75	68.5	70.58	SAE			s_273 [1634]	TRACHYBASALT [1634]									VOL					WR [1634]	47.45	3.46		16.94				12.07	6.93	4.93	0.15		1.97	3.96	0.65
[1634]	OCEAN ISLAND	KERGUELEN / KERGUELEN ARCHIPELAGO	JEANNE D^ARC PENINSULA, RAVIN DU CHARBON, PORT JEANNE D^ARC, UNIT 2	-48.55	-49.75	68.5	70.58	SAE			s_271 [1634]	TRACHYBASALT [1634]									VOL					WR [1634]	48	3.07		16.94				12.03	6.91	4.46	0.17		2.23	4.16	0.78
[1634]	OCEAN ISLAND	KERGUELEN / KERGUELEN ARCHIPELAGO	JEANNE D^ARC PENINSULA, RAVIN DU CHARBON, UNIT 3	-48.55	-49.75	68.5	70.58	SAE			s_685 [1634]	BASALT, ALKALINE [1634]									VOL					WR [1634]	48.44	2.87		13.52				11.18	9.78	7.36	0.22		1.73	2.96	0.56
[1634]	OCEAN ISLAND	KERGUELEN / KERGUELEN ARCHIPELAGO	JEANNE D^ARC PENINSULA, RAVIN DU CHARBON, UNIT 3	-48.55	-49.75	68.5	70.58	SAE			s_686 [1634]	BASALT, ALKALINE [1634]									VOL					WR [1634]	48.24	3.37		15.87				10.97	9.59	5.42	0.17		1.55	3.13	0.46
[1634]	OCEAN ISLAND	KERGUELEN / KERGUELEN ARCHIPELAGO	JEANNE D^ARC PENINSULA, NORTHWEST OF RAVIN DU CHARBON, UNIT 4	-48.55	-49.75	68.5	70.58	SAE			s_272 [1634]	TRACHYTE [1634]									VOL					WR [1634]	63.3	0.38		15.96				5.76	1.87	0.22	0.17		5.74	5.61	0.06
[1634]	OCEAN ISLAND	KERGUELEN / KERGUELEN ARCHIPELAGO	JEANNE D^ARC PENINSULA, RAVIN DU CHARBON, UNIT 5	-48.55	-49.75	68.5	70.58	SAE			s_713 [1634]	TRACHYANDESITE, BASALTIC [1634]									VOL					WR [1634]	50.95	3.01		15.28				10.86	7.02	3.72	0.178		2.66	3.99	0.94
[1634]	OCEAN ISLAND	KERGUELEN / KERGUELEN ARCHIPELAGO	JEANNE D^ARC PENINSULA, RAVIN DU CHARBON, UNIT 5	-48.55	-49.75	68.5	70.58	SAE			s_715 [1634]	TRACHYANDESITE [1634]									VOL					WR [1634]	56.95	1.69		16.83				7.5	4.63	1.52	0.152		3.64	5.42	0.57
[1634]	OCEAN ISLAND	KERGUELEN / KERGUELEN ARCHIPELAGO	JEANNE D^ARC PENINSULA, RAVIN DU CHARBON, UNIT 5	-48.55	-49.75	68.5	70.58	SAE			s_716 [1634]	TRACHYANDESITE [1634]									VOL					WR [1634]	57.3	1.74		16.64				6.92	4.78	1.96	0.143		3.61	5.36	0.55
[1634]	OCEAN ISLAND	KERGUELEN / KERGUELEN ARCHIPELAGO	JEANNE D^ARC PENINSULA, RAVIN DU CHARBON, UNIT 5	-48.55	-49.75	68.5	70.58	SAE			s_717 [1634]	TRACHYBASALT [1634]									VOL					WR [1634]	49.53	3.49		15.58				11.02	7.97	4.6	0.181		2.12	3.66	0.66
[1634]	OCEAN ISLAND	KERGUELEN / KERGUELEN ARCHIPELAGO	JEANNE D^ARC PENINSULA, RAVIN DU CHARBON, UNIT 5	-48.55	-49.75	68.5	70.58	SAE			s_718 [1634]	TRACHYBASALT [1634]									VOL					WR [1634]	48.56	3.61		16.07				11.15	8.55	4.42	0.176		1.92	3.65	0.59
[1634]	OCEAN ISLAND	KERGUELEN / KERGUELEN ARCHIPELAGO	JEANNE D^ARC PENINSULA, RAVIN DU CHARBON, UNIT 5	-48.55	-49.75	68.5	70.58	SAE			s_720 [1634]	TRACHYBASALT [1634]									VOL					WR [1634]	49.01	3.11		15.55				10.63	8.36	6.01	0.158		2.19	3.31	0.56
[1634]	OCEAN ISLAND	KERGUELEN / KERGUELEN ARCHIPELAGO	JEANNE D^ARC PENINSULA, RAVIN DU CHARBON, UNIT 5	-48.55	-49.75	68.5	70.58	SAE			s_721 [1634]	BASALT, ALKALINE [1634]									VOL					WR [1634]	46.88	3.78		14.13				13.03	10.53	5.59	0.279		0.94	2.97	0.41
[1634]	OCEAN ISLAND	KERGUELEN / KERGUELEN ARCHIPELAGO	JEANNE D^ARC PENINSULA, RAVIN DU CHARBON, UNIT 5	-48.55	-49.75	68.5	70.58	SAE			s_722 [1634]	TRACHYBASALT [1634]									VOL					WR [1634]	50.05	3.28		15.23				11.57	7.73	3.94	0.167		2.13	3.78	0.66
[1634]	OCEAN ISLAND	KERGUELEN / KERGUELEN ARCHIPELAGO	JEANNE D^ARC PENINSULA, RAVIN DU CHARBON, UNIT 5	-48.55	-49.75	68.5	70.58	SAE			s_723 [1634]	TRACHYBASALT [1634]									VOL					WR [1634]	48.76	3.59		15.81				11.14	8.45	4.55	0.173		2.2	3.54	0.75
[1634]	OCEAN ISLAND	KERGUELEN / KERGUELEN ARCHIPELAGO	JEANNE D^ARC PENINSULA, RAVIN DU CHARBON, UNIT 5	-48.55	-49.75	68.5	70.58	SAE			s_724 [1634]	TRACHYBASALT [1634]									VOL					WR [1634]	49.52	3.32		16.92				10.25	8.36	3.8	0.162		2.4	3.45	0.76
[1634]	OCEAN ISLAND	KERGUELEN / KERGUELEN ARCHIPELAGO	JEANNE D^ARC PENINSULA, RAVIN DU CHARBON, UNIT 5	-48.55	-49.75	68.5	70.58	SAE			s_725 [1634]	TRACHYBASALT [1634]									VOL					WR [1634]	49.03	3.24		16.99				10.09	8.16	4.72	0.171		2.29	3.25	0.71
[1634]	OCEAN ISLAND	KERGUELEN / KERGUELEN ARCHIPELAGO	JEANNE D^ARC PENINSULA, RAVIN DU CHARBON, UNIT 5	-48.55	-49.75	68.5	70.58	SAE			s_726 [1634]	TRACHYBASALT [1634]									VOL					WR [1634]	49.25	3.16		16.93				10.04	8.04	4.37	0.153		2.35	3.51	0.73
[1634]	OCEAN ISLAND	KERGUELEN / KERGUELEN ARCHIPELAGO	JEANNE D^ARC PENINSULA, RAVIN DU CHARBON, UNIT 5	-48.55	-49.75	68.5	70.58	SAE			s_727 [1634]	TRACHYBASALT [1634]									VOL					WR [1634]	48.3	3.25		17.84				9.87	9.35	4.11	0.193		1.94	3.2	0.6
[1634]	OCEAN ISLAND	KERGUELEN / KERGUELEN ARCHIPELAGO	JEANNE D^ARC PENINSULA, RAVIN DU CHARBON, UNIT 5	-48.55	-49.75	68.5	70.58	SAE			s_729 [1634]	BASALT, ALKALINE [1634]									VOL					WR [1634]	48.03	3.34		17.6				10.31	9.6	4.06	0.16		1.8	3.15	0.57
[1634]	OCEAN ISLAND	KERGUELEN / KERGUELEN ARCHIPELAGO	JEANNE D^ARC PENINSULA, RAVIN DU CHARBON, UNIT 5	-48.55	-49.75	68.5	70.58	SAE			s_730 [1634]	BASALT, ALKALINE [1634]									VOL					WR [1634]	48.17	3.28		17.74				9.79	10.02	4.17	0.157		1.72	3.01	0.55
[1634]	OCEAN ISLAND	KERGUELEN / KERGUELEN ARCHIPELAGO	JEANNE D^ARC PENINSULA, RAVIN DU CHARBON, UNIT 5	-48.55	-49.75	68.5	70.58	SAE			s_731 [1634]	TRACHYBASALT [1634]									VOL					WR [1634]	50.05	2.55		17.19				9.39	8.02	5.06	0.142		2.16	3.36	0.64
[1634]	OCEAN ISLAND	KERGUELEN / KERGUELEN ARCHIPELAGO	JEANNE D^ARC PENINSULA, RAVIN DU CHARBON, UNIT 5	-48.55	-49.75	68.5	70.58	SAE			s_732 [1634]	TRACHYANDESITE, BASALTIC [1634]									VOL					WR [1634]	50.68	2.58		17.81				8.94	7.94	3.74	0.151		2.48	3.79	0.75
[1634]	OCEAN ISLAND	KERGUELEN / KERGUELEN ARCHIPELAGO	JEANNE D^ARC PENINSULA, RAVIN DU CHARBON, UNIT 5	-48.55	-49.75	68.5	70.58	SAE			s_733 [1634]	TRACHYANDESITE, BASALTIC [1634]									VOL					WR [1634]	51.69	2.62		18.27				7.88	8.18	2.97	0.155		2.58	3.8	0.77
[1634]	OCEAN ISLAND	KERGUELEN / KERGUELEN ARCHIPELAGO	JEANNE D^ARC PENINSULA, RAVIN DU CHARBON, UNIT 5	-48.55	-49.75	68.5	70.58	SAE			s_734 [1634]	BASALT, ALKALINE [1634]									VOL					WR [1634]	46.7	3.38		14.35				11.89	8.13	8.5	0.173		0.9	4.06	0.69
[1634]	OCEAN ISLAND	KERGUELEN / KERGUELEN ARCHIPELAGO	JEANNE D^ARC PENINSULA, RAVIN DU CHARBON, UNIT 5	-48.55	-49.75	68.5	70.58	SAE			s_735 [1634]	TRACHYANDESITE, BASALTIC [1634]									VOL					WR [1634]	52.06	2.66		18.36				7.42	8	2.79	0.166		2.61	3.92	0.79
[1634]	OCEAN ISLAND	KERGUELEN / KERGUELEN ARCHIPELAGO	JEANNE D^ARC PENINSULA, RAVIN DU CHARBON, UNIT 5	-48.55	-49.75	68.5	70.58	SAE			s_736 [1634]	TRACHYANDESITE, BASALTIC [1634]									VOL					WR [1634]	52.13	2.76		18.27				7.75	8.21	2.48	0.168		2.56	3.79	0.78
[1634]	OCEAN ISLAND	KERGUELEN / KERGUELEN ARCHIPELAGO	JEANNE D^ARC PENINSULA, RAVIN DU CHARBON, DIKES/SILL	-48.55	-49.75	68.5	70.58	SAE			s_682 [1634]	BASANITE [1634]									VOL					WR [1634]	43.16	3.52		11.32				12.04	10.06	12.01	0.17		2.31	3.07	0.79
[1634]	OCEAN ISLAND	KERGUELEN / KERGUELEN ARCHIPELAGO	JEANNE D^ARC PENINSULA, RAVIN DU CHARBON, DIKES/SILL	-48.55	-49.75	68.5	70.58	SAE			s_714 [1634]	BASALT, ALKALINE [1634]									VOL					WR [1634]	47.74	2.72		13.52				11.26	10.11	7.88	0.17		1.54	3.19	0.51
[1634]	OCEAN ISLAND	KERGUELEN / KERGUELEN ARCHIPELAGO	JEANNE D^ARC PENINSULA, RAVIN DU CHARBON, DIKES/SILL	-48.55	-49.75	68.5	70.58	SAE			s_728 [1634]	TRACHYANDESITE [1634]									VOL					WR [1634]	55.46	0.81		17.71				9.28	3.2	1.64	0.157		4.12	5.18	1.1
[10516]	OCEAN ISLAND	KERGUELEN / MOUNT CAPITOLE	PLATEAU CENTRAL	-48.55	-49.75	68.5	70.58	SAE			s_93-459 [10516]	BASALT [10516]								PLAGIOCLASE -PHYRIC [10516]	VOL			S		WR [10516]	48.71	2.04		18.05				9.87	11.57	4.78	0.17		0.67	2.74	0.26
[10516]	OCEAN ISLAND	KERGUELEN / MOUNT CAPITOLE	PLATEAU CENTRAL	-48.55	-49.75	68.5	70.58	SAE			s_93-460 [10516]	BASALT [10516]								PLAGIOCLASE -PHYRIC [10516]	VOL					WR [10516]	48.69	2.39		16.8				11.19	10.52	4.67	0.19		0.88	2.91	0.34
[10516]	OCEAN ISLAND	KERGUELEN / MOUNT CAPITOLE	PLATEAU CENTRAL	-48.55	-49.75	68.5	70.58	SAE			s_93-461 [10516]	BASALT [10516]									VOL					WR [10516]	48.77	2.6		15.35				12.01	10.56	4.93	0.2		0.78	3.01	0.34
[10516]	OCEAN ISLAND	KERGUELEN / MOUNT CAPITOLE	PLATEAU CENTRAL	-48.55	-49.75	68.5	70.58	SAE			s_93-462 [10516]	BASALT [10516]								PLAGIOCLASE -PHYRIC [10516]	VOL					WR [10516]	48.49	2.33		16.22				11.17	11	5.46	0.19		0.64	2.65	0.29
[10516]	OCEAN ISLAND	KERGUELEN / MOUNT CAPITOLE	PLATEAU CENTRAL	-48.55	-49.75	68.5	70.58	SAE			s_93-463 [10516]	BASALT [10516]									VOL			S		WR [10516]	48.13	2.33		15.71				11.63	10.76	6.47	0.19		0.66	2.43	0.28
[10516]	OCEAN ISLAND	KERGUELEN / MOUNT CAPITOLE	PLATEAU CENTRAL	-48.55	-49.75	68.5	70.58	SAE			s_93-464 [10516]	BASALT [10516]									VOL					WR [10516]	48.18	2.76		14.55				12.5	10.44	5.81	0.2		0.7	2.88	0.32
[10516]	OCEAN ISLAND	KERGUELEN / MOUNT CAPITOLE	PLATEAU CENTRAL	-48.55	-49.75	68.5	70.58	SAE			s_93-465 [10516]	BASALT [10516]								PLAGIOCLASE -PHYRIC [10516]	VOL			S		WR [10516]	48.5	2.27		16.2				10.95	11.1	6	0.18		0.69	2.55	0.26
[10516]	OCEAN ISLAND	KERGUELEN / MOUNT CAPITOLE	PLATEAU CENTRAL	-48.55	-49.75	68.5	70.58	SAE			s_93-467 [10516]	BASALT [10516]									VOL					WR [10516]	48.5	2.61		14.29				12.05	10.91	6.54	0.21		0.48	2.66	0.32
[10516]	OCEAN ISLAND	KERGUELEN / MOUNT CAPITOLE	PLATEAU CENTRAL	-48.55	-49.75	68.5	70.58	SAE			s_93-468 [10516]	BASALT [10516]									VOL					WR [10516]	48.45	2.53		14.94				11.87	11	6.42	0.18		0.51	2.04	0.3
[10516]	OCEAN ISLAND	KERGUELEN / MOUNT CAPITOLE	PLATEAU CENTRAL	-48.55	-49.75	68.5	70.58	SAE			s_93-469 [10516]	BASALT [10516]									VOL					WR [10516]	48.89	2.49		14.54				11.74	10.9	6.27	0.19		0.56	2.46	0.3
[10516]	OCEAN ISLAND	KERGUELEN / MOUNT CAPITOLE	PLATEAU CENTRAL	-48.55	-49.75	68.5	70.58	SAE			s_93-470 [10516]	BASALT [10516]									VOL					WR [10516]	47.95	2.35		15.92				11.02	10.75	6.3	0.18		0.54	2.93	0.27
[10516]	OCEAN ISLAND	KERGUELEN / MOUNT CAPITOLE	PLATEAU CENTRAL	-48.55	-49.75	68.5	70.58	SAE			s_93-471 [10516]	BASALT [10516]								PLAGIOCLASE -PHYRIC [10516]	VOL			S		WR [10516]	48.52	2.38		15.91				11.25	11.13	6.24	0.19		0.59	2.46	0.28
[10516]	OCEAN ISLAND	KERGUELEN / MOUNT CAPITOLE	PLATEAU CENTRAL	-48.55	-49.75	68.5	70.58	SAE			s_93-472 [10516]	BASALT [10516]								PLAGIOCLASE -PHYRIC [10516]	VOL			S		WR [10516]	47.24	2.27		15.1				11.61	11.15	8	0.19		0.46	2.27	0.29
[10516]	OCEAN ISLAND	KERGUELEN / MOUNT CAPITOLE	PLATEAU CENTRAL	-48.55	-49.75	68.5	70.58	SAE			s_93-473 [10516]	BASALT [10516]								PLAGIOCLASE -PHYRIC [10516]	VOL			S		WR [10516]	47.89	2.5		15.89				11.97	10.37	5.93	0.2		0.55	2.88	0.31
[10516]	OCEAN ISLAND	KERGUELEN / MOUNT CAPITOLE	PLATEAU CENTRAL	-48.55	-49.75	68.5	70.58	SAE			s_93-474 [10516]	BASALT [10516]								PLAGIOCLASE -PHYRIC [10516]	VOL					WR [10516]	48.57	2.73		15				11.77	10.8	5.48	0.19		0.57	2.79	0.37
[10516]	OCEAN ISLAND	KERGUELEN / MOUNT CAPITOLE	PLATEAU CENTRAL	-48.55	-49.75	68.5	70.58	SAE			s_93-475 [10516]	BASALT [10516]									VOL					WR [10516]	48.58	2.52		14.49				11.66	11.01	7.12	0.19		0.2	2.12	0.29
[10516]	OCEAN ISLAND	KERGUELEN / MOUNT CAPITOLE	PLATEAU CENTRAL	-48.55	-49.75	68.5	70.58	SAE			s_93-476 [10516]	BASALT [10516]									VOL			S		WR [10516]	49.51	3.26		13.31				13.18	10.19	4.55	0.2		0.77	2.86	0.45
[10516]	OCEAN ISLAND	KERGUELEN / MOUNT CAPITOLE	PLATEAU CENTRAL	-48.55	-49.75	68.5	70.58	SAE			s_93-477 [10516]	BASALT [10516]									VOL					WR [10516]	49.12	3.23		13.2				13.32	9.74	5.06	0.2		1	2.9	0.45
[10516]	OCEAN ISLAND	KERGUELEN / MOUNT CAPITOLE	PLATEAU CENTRAL	-48.55	-49.75	68.5	70.58	SAE			s_93-478 [10516]	BASALT [10516]									VOL					WR [10516]	48.5	3.17		14.25				12.88	10.08	5.22	0.18		0.76	2.85	0.41
[10516]	OCEAN ISLAND	KERGUELEN / MOUNT CAPITOLE	PLATEAU CENTRAL	-48.55	-49.75	68.5	70.58	SAE			s_93-479 [10516]	BASALT [10516]									VOL			S		WR [10516]	47.88	3.87		12.95				14.75	9.76	4.62	0.26		0.47	2.73	0.5
[10516]	OCEAN ISLAND	KERGUELEN / MOUNT CAPITOLE	PLATEAU CENTRAL	-48.55	-49.75	68.5	70.58	SAE			s_93-480 [10516]	BASALT [10516]									VOL					WR [10516]	49.33	3.74		13.18				14.25	9.42	4.19	0.2		0.97	2.85	0.5
[10516]	OCEAN ISLAND	KERGUELEN / MOUNT CAPITOLE	PLATEAU CENTRAL	-48.55	-49.75	68.5	70.58	SAE			s_93-481 [10516]	BASALT [10516]									VOL					WR [10516]	48.55	3.89		12.59				14.77	9.38	4.58	0.24		0.8	2.76	0.48
[10516]	OCEAN ISLAND	KERGUELEN / MOUNT CAPITOLE	PLATEAU CENTRAL	-48.55	-49.75	68.5	70.58	SAE			s_93-482 [10516]	BASALT [10516]									VOL			S		WR [10516]	47.12	4.2		13.27				14.82	9.83	4.82	0.24		0.71	2.95	0.52
[10516]	OCEAN ISLAND	KERGUELEN / MOUNT CAPITOLE	PLATEAU CENTRAL	-48.55	-49.75	68.5	70.58	SAE			s_93-483 [10516]	BASALT [10516]									VOL			S		WR [10516]	46.17	4.47		13.3				15.58	9.13	4.59	0.26		0.98	2.72	0.55
[10516]	OCEAN ISLAND	KERGUELEN / MOUNT CAPITOLE	PLATEAU CENTRAL	-48.55	-49.75	68.5	70.58	SAE			s_93-484 [10516]	BASALT [10516]									VOL					WR [10516]	47.69	4.02		13.34				14.15	10.32	4.65	0.27		0.75	2.6	0.47
[10516]	OCEAN ISLAND	KERGUELEN / MOUNT CAPITOLE	PLATEAU CENTRAL	-48.55	-49.75	68.5	70.58	SAE			s_93-485 [10516]	BASALT [10516]									VOL					WR [10516]	47.46	3.78		13.52				14.38	10.47	4.93	0.24		0.41	2.4	0.43
[10516]	OCEAN ISLAND	KERGUELEN / MOUNT CAPITOLE	PLATEAU CENTRAL	-48.55	-49.75	68.5	70.58	SAE			s_93-486 [10516]	BASALT [10516]								PLAGIOCLASE -PHYRIC [10516]	VOL					WR [10516]	47.76	3.75		13.38				14.26	10.21	5.18	0.22		0.6	2.39	0.44
[10516]	OCEAN ISLAND	KERGUELEN / MOUNT CAPITOLE	PLATEAU CENTRAL	-48.55	-49.75	68.5	70.58	SAE			s_93-487 [10516]	BASALT [10516]									VOL					WR [10516]	47.33	3.83		14.18				14.41	10.11	4.61	0.22		0.42	2.92	0.45
[10516]	OCEAN ISLAND	KERGUELEN / MOUNT CAPITOLE	PLATEAU CENTRAL	-48.55	-49.75	68.5	70.58	SAE			s_93-488 [10516]	BASALT [10516]									VOL					WR [10516]	48.75	3.56		12.93				14.13	9.75	4.95	0.22		0.47	2.36	0.45
[10516]	OCEAN ISLAND	KERGUELEN / MOUNT CAPITOLE	PLATEAU CENTRAL	-48.55	-49.75	68.5	70.58	SAE			s_93-489 [10516]	BASALT [10516]									VOL					WR [10516]	49.25	3.48		13.16				13.61	10.08	5.05	0.23		0.44	2.34	0.42
[10516]	OCEAN ISLAND	KERGUELEN / MOUNT CAPITOLE	PLATEAU CENTRAL	-48.55	-49.75	68.5	70.58	SAE			s_93-490 [10516]	BASALT [10516]									VOL			S		WR [10516]	48.58	3.29		13.6				13.26	10.4	5.39	0.22		0.35	2.53	0.4
[10516]	OCEAN ISLAND	KERGUELEN / MOUNT CAPITOLE	PLATEAU CENTRAL	-48.55	-49.75	68.5	70.58	SAE			s_93-491 [10516]	BASALT [10516]								PLAGIOCLASE -PHYRIC [10516]	VOL					WR [10516]	51.66	3.82		12.87				13.06	8.6	3.77	0.18		1.02	2.8	0.48
[10516]	OCEAN ISLAND	KERGUELEN / MOUNT CAPITOLE	PLATEAU CENTRAL	-48.55	-49.75	68.5	70.58	SAE			s_93-492 [10516]	BASALT [10516]									VOL					WR [10516]	47.84	3.33		13.7				13.5	10.31	5.82	0.25		0.4	2.53	0.41
[10516]	OCEAN ISLAND	KERGUELEN / MOUNT CAPITOLE	PLATEAU CENTRAL	-48.55	-49.75	68.5	70.58	SAE			s_93-493 [10516]	BASALT [10516]									VOL					WR [10516]	47.57	3.35		13.84				13.78	10.41	5.84	0.19		0.23	2.29	0.37
[10516]	OCEAN ISLAND	KERGUELEN / MOUNT CAPITOLE	PLATEAU CENTRAL	-48.55	-49.75	68.5	70.58	SAE			s_93-494 [10516]	BASALT [10516]									VOL					WR [10516]	49.66	3.34		12.97				13.51	9.53	5.01	0.22		0.74	2.78	0.4
[10516]	OCEAN ISLAND	KERGUELEN / MOUNT CAPITOLE	PLATEAU CENTRAL	-48.55	-49.75	68.5	70.58	SAE			s_93-495 [10516]	BASALT [10516]									VOL			S		WR [10516]	49.88	3.32		13.2				12.99	9.42	4.94	0.19		0.83	2.8	0.4
[10516]	OCEAN ISLAND	KERGUELEN / MOUNT CAPITOLE	PLATEAU CENTRAL	-48.55	-49.75	68.5	70.58	SAE			s_93-496 [10516]	BASALT [10516]									VOL					WR [10516]	50.29	3.5		13.39				12.97	8.66	4.56	0.24		1.02	2.95	0.44
[10516]	OCEAN ISLAND	KERGUELEN / MOUNT CAPITOLE	PLATEAU CENTRAL	-48.55	-49.75	68.5	70.58	SAE			s_93-497 [10516]	BASALT [10516]									VOL					WR [10516]	49.1	3.55		13.32				13.77	9.25	5.1	0.25		0.57	2.8	0.44
[10516]	OCEAN ISLAND	KERGUELEN / MOUNT CAPITOLE	PLATEAU CENTRAL	-48.55	-49.75	68.5	70.58	SAE			s_93-498 [10516]	BASALT [10516]									VOL					WR [10516]	49.86	3.63		13.3				13.82	9.28	4.69	0.2		0.5	2.74	0.44
[10516]	OCEAN ISLAND	KERGUELEN / MOUNT CAPITOLE	PLATEAU CENTRAL	-48.55	-49.75	68.5	70.58	SAE			s_93-499 [10516]	BASALT [10516]									VOL					WR [10516]	49.48	3.23		13.23				12.88	10.08	5.43	0.23		0.45	2.74	0.39
[10516]	OCEAN ISLAND	KERGUELEN / MOUNT CAPITOLE	PLATEAU CENTRAL	-48.55	-49.75	68.5	70.58	SAE			s_93-500 [10516]	BASALT [10516]									VOL					WR [10516]	49.73	3.57		13.24				13.26	9.55	5.34	0.26		0.63	2.86	0.43
[10516]	OCEAN ISLAND	KERGUELEN / MOUNT CAPITOLE	PLATEAU CENTRAL	-48.55	-49.75	68.5	70.58	SAE			s_93-501 [10516]	BASALT [10516]									VOL					WR [10516]	49.39	3.14		13.93				12.91	10.26	5.17	0.22		0.49	2.98	0.37
[10516]	OCEAN ISLAND	KERGUELEN / MOUNT CAPITOLE	PLATEAU CENTRAL	-48.55	-49.75	68.5	70.58	SAE			s_93-502 [10516]	BASALT [10516]									VOL					WR [10516]	48.52	3		14.26				12.24	10.72	5.96	0.22		0.51	2.66	0.33
[10516]	OCEAN ISLAND	KERGUELEN / MOUNT CAPITOLE	PLATEAU CENTRAL	-48.55	-49.75	68.5	70.58	SAE			s_93-503 [10516]	BASALT [10516]									VOL					WR [10516]	48.53	3.31		13.62				13.34	10.49	5.58	0.21		0.33	2.38	0.39
[10516]	OCEAN ISLAND	KERGUELEN / MOUNT CAPITOLE	PLATEAU CENTRAL	-48.55	-49.75	68.5	70.58	SAE			s_93-504 [10516]	BASALT [10516]									VOL					WR [10516]	48.25	3.9		13.33				14.27	9.19	5.05	0.3		0.9	2.17	0.47
[10516]	OCEAN ISLAND	KERGUELEN / MOUNT CAPITOLE	PLATEAU CENTRAL	-48.55	-49.75	68.5	70.58	SAE			s_93-505 [10516]	BASALT [10516]									VOL			S		WR [10516]	51.43	3.93		13.31				12.73	8.54	3.95	0.18		0.98	2.69	0.5
[10516]	OCEAN ISLAND	KERGUELEN / MOUNT CAPITOLE	PLATEAU CENTRAL	-48.55	-49.75	68.5	70.58	SAE			s_93-506 [10516]	BASALT [10516]									VOL					WR [10516]	49.76	3.46		13.8				13.2	8.69	4.73	0.27		0.89	2.97	0.49
[10516]	OCEAN ISLAND	KERGUELEN / MOUNT CAPITOLE	PLATEAU CENTRAL	-48.55	-49.75	68.5	70.58	SAE			s_93-507 [10516]	BASALT [10516]									VOL			S		WR [10516]	50.18	3.44		13.71				13.45	8.63	4.37	0.21		1.08	3	0.49
[10516]	OCEAN ISLAND	KERGUELEN / MOUNT CAPITOLE	PLATEAU CENTRAL	-48.55	-49.75	68.5	70.58	SAE			s_93-508 [10516]	BASALT [10516]									VOL					WR [10516]	50.22	3.72		12.91				13.65	8.34	4.37	0.2		1.19	2.97	0.48
[10516]	OCEAN ISLAND	KERGUELEN / MOUNT CAPITOLE	PLATEAU CENTRAL	-48.55	-49.75	68.5	70.58	SAE			s_93-509 [10516]	BASALT [10516]									VOL					WR [10516]	50.54	3.51		13.15				12.94	8.67	4.39	0.21		0.99	3.23	0.47
[10516]	OCEAN ISLAND	KERGUELEN / MOUNT CAPITOLE	PLATEAU CENTRAL	-48.55	-49.75	68.5	70.58	SAE			s_93-510 [10516]	BASALT [10516]									VOL			S		WR [10516]	52.88	3.5		13.41				12.13	7.14	3.29	0.18		1.62	3.3	0.69
[10516]	OCEAN ISLAND	KERGUELEN / MOUNT CAPITOLE	PLATEAU CENTRAL	-48.55	-49.75	68.5	70.58	SAE			s_93-511 [10516]	BASALT [10516]									VOL					WR [10516]	51.39	3.68		13.6				12.93	8.37	3.78	0.23		1.01	2.81	0.6
[10516]	OCEAN ISLAND	KERGUELEN / MOUNT CAPITOLE	PLATEAU CENTRAL	-48.55	-49.75	68.5	70.58	SAE			s_93-512 [10516]	BASALT [10516]									VOL			S		WR [10516]	50.93	2.9		13.5				12.34	9.53	5.12	0.2		0.65	2.83	0.37
[10516]	OCEAN ISLAND	KERGUELEN / MOUNT CAPITOLE	PLATEAU CENTRAL	-48.55	-49.75	68.5	70.58	SAE			s_93-513 [10516]	BASALT [10516]									VOL					WR [10516]	50.68	2.83		13.88				12.26	9.76	5.35	0.21		0.48	2.48	0.36
[10516]	OCEAN ISLAND	KERGUELEN / MOUNT CAPITOLE	PLATEAU CENTRAL	-48.55	-49.75	68.5	70.58	SAE			s_93-514 [10516]	BASALT [10516]									VOL					WR [10516]	50.14	3.3		13.42				13	9.04	4.74	0.19		0.71	3.13	0.41
[10516]	OCEAN ISLAND	KERGUELEN / MOUNT CAPITOLE	PLATEAU CENTRAL	-48.55	-49.75	68.5	70.58	SAE			s_93-465 [10516]	BASALT [10516]								PLAGIOCLASE -PHYRIC [10516]	VOL			S		WR [10516]
[10516]	OCEAN ISLAND	KERGUELEN / MOUNT CAPITOLE	PLATEAU CENTRAL	-48.55	-49.75	68.5	70.58	SAE			s_93-465 [10516]	BASALT [10516]								PLAGIOCLASE -PHYRIC [10516]	VOL			S		WR [10516]
[10516]	OCEAN ISLAND	KERGUELEN / MOUNT CAPITOLE	PLATEAU CENTRAL	-48.55	-49.75	68.5	70.58	SAE			s_93-490 [10516]	BASALT [10516]									VOL			S		WR [10516]
[10516]	OCEAN ISLAND	KERGUELEN / MOUNT CAPITOLE	PLATEAU CENTRAL	-48.55	-49.75	68.5	70.58	SAE			s_93-512 [10516]	BASALT [10516]									VOL			S		WR [10516]
[11073]	OCEAN ISLAND	KERGUELEN / KERGUELEN ARCHIPELAGO / VAL GABBRO PLUTONIC SUITE	SE JEANNE D^ARC PENINSULA	-49.7276	-49.7276	70.0728	70.0728	SAE			s_MPC99-47 [11073]	NOT GIVEN [11073]				OLIGOCENE [11073]					VOL					WR [11073]	59.45	0.97		18.15				6.02	3.15	1.14	0.09		4.93	5.17	0.24
[11073]	OCEAN ISLAND	KERGUELEN / KERGUELEN ARCHIPELAGO / VAL GABBRO PLUTONIC SUITE	SE JEANNE D^ARC PENINSULA	-49.7276	-49.7276	70.0728	70.0728	SAE			s_MPC99-49 [11073]	NOT GIVEN [11073]				OLIGOCENE [11073]					VOL					WR [11073]	64.3	0.5		17.87				3.44	1.58	0.42	0.07		5.71	5.62	0.1
[11073]	OCEAN ISLAND	KERGUELEN / KERGUELEN ARCHIPELAGO / VAL GABBRO PLUTONIC SUITE	SE JEANNE D^ARC PENINSULA	-49.7207	-49.7207	70.0752	70.0752	SAE			s_MPC99-50 [11073]	NOT GIVEN [11073]				OLIGOCENE [11073]					VOL					WR [11073]	63.58	0.94		17.43				3.23	1.24	1.46	0.04		6.41	4.95	0.21
[11073]	OCEAN ISLAND	KERGUELEN / KERGUELEN ARCHIPELAGO / VAL GABBRO PLUTONIC SUITE	SE JEANNE D^ARC PENINSULA	-49.719	-49.719	70.0748	70.0748	SAE			s_MPC99-53A/A [11073]	NOT GIVEN [11073]				OLIGOCENE [11073]					VOL					WR [11073]	63.8	0.9		16.8				5.23	2.03	1.24	0.05		4.74	4.55	0.25
[11073]	OCEAN ISLAND	KERGUELEN / KERGUELEN ARCHIPELAGO / VAL GABBRO PLUTONIC SUITE	SE JEANNE D^ARC PENINSULA	-49.719	-49.719	70.0748	70.0748	SAE			s_MPC99-53B/A [11073]	NOT GIVEN [11073]				OLIGOCENE [11073]					VOL					WR [11073]	64.03	0.92		16.61				5.22	1.77	1.24	0.04		4.9	4.53	0.26
[11073]	OCEAN ISLAND	KERGUELEN / KERGUELEN ARCHIPELAGO / VAL GABBRO PLUTONIC SUITE	SE JEANNE D^ARC PENINSULA	-49.719	-49.719	70.0748	70.0748	SAE			s_MPC99-53C/A [11073]	NOT GIVEN [11073]				OLIGOCENE [11073]					VOL					WR [11073]	63.39	1.03		17.42				3.95	1.89	1.24	0.04		6.37	4.11	0.22
[11073]	OCEAN ISLAND	KERGUELEN / KERGUELEN ARCHIPELAGO / VAL GABBRO PLUTONIC SUITE	SE JEANNE D^ARC PENINSULA	-49.7164	-49.7164	70.0777	70.0777	SAE			s_MPC99-56 [11073]	NOT GIVEN [11073]				OLIGOCENE [11073]					VOL					WR [11073]	61.86	1.32		16.05				5.98	3.2	1.26	0.12		5.06	4.29	0.34
[11073]	OCEAN ISLAND	KERGUELEN / KERGUELEN ARCHIPELAGO / VAL GABBRO PLUTONIC SUITE	SE JEANNE D^ARC PENINSULA	-49.7164	-49.7164	70.0777	70.0777	SAE			s_MPC99-57 [11073]	NOT GIVEN [11073]				OLIGOCENE [11073]					VOL					WR [11073]	67.18	0.98		16.25				2.11	1.06	0.68	0.03		7.88	3.23	0.21
[11073]	OCEAN ISLAND	KERGUELEN / KERGUELEN ARCHIPELAGO / VAL GABBRO PLUTONIC SUITE	SE JEANNE D^ARC PENINSULA	-49.7276	-49.7276	70.083	70.083	SAE			s_MPC99-42 [11073]	BASALT [11073]				OLIGOCENE [11073]					VOL					WR [11073]	49.38	3.35		16.19				11.74	8.61	4.87	0.21		1.18	2.59	0.46
[11073]	OCEAN ISLAND	KERGUELEN / KERGUELEN ARCHIPELAGO / VAL GABBRO PLUTONIC SUITE	SE JEANNE D^ARC PENINSULA	-49.719	-49.719	70.0748	70.0748	SAE			s_MPC99-53A/B [11073]	BASALT [11073]				OLIGOCENE [11073]					VOL					WR [11073]	48.1	3.11		17.02				12.04	8.82	4.81	0.21		1.23	3.29	0.4
[11073]	OCEAN ISLAND	KERGUELEN / KERGUELEN ARCHIPELAGO / VAL GABBRO PLUTONIC SUITE	SE JEANNE D^ARC PENINSULA	-49.719	-49.719	70.0748	70.0748	SAE			s_MPC99-53C/B [11073]	BASALT [11073]				OLIGOCENE [11073]					VOL					WR [11073]	49.1	3.26		16.34				10.8	9.85	4.29	0.18		1.42	2.9	0.44
[11073]	OCEAN ISLAND	KERGUELEN / KERGUELEN ARCHIPELAGO / VAL GABBRO PLUTONIC SUITE	SE JEANNE D^ARC PENINSULA	-49.6957	-49.6957	70.1203	70.1203	SAE			s_MPC99-61 [11073]	BASALT [11073]				OLIGOCENE [11073]					VOL					WR [11073]	48.38	2.87		16.6				10.63	9.95	5.88	0.14		1.19	2.86	0.35
[11073]	OCEAN ISLAND	KERGUELEN / KERGUELEN ARCHIPELAGO / VAL GABBRO PLUTONIC SUITE	SE JEANNE D^ARC PENINSULA	-49.6957	-49.6957	70.1203	70.1203	SAE			s_MPC99-62 [11073]	BASALT [11073]				OLIGOCENE [11073]					VOL					WR [11073]	48.3	2.87		16.57				10.64	9.5	6.24	0.16		1.15	3.05	0.33
[11073]	OCEAN ISLAND	KERGUELEN / KERGUELEN ARCHIPELAGO / VAL GABBRO PLUTONIC SUITE	SE JEANNE D^ARC PENINSULA	-49.719	-49.719	70.0748	70.0748	SAE			s_MPC99-53A/A [11073]	NOT GIVEN [11073]				OLIGOCENE [11073]					VOL					WR [11073]
[11073]	OCEAN ISLAND	KERGUELEN / KERGUELEN ARCHIPELAGO / VAL GABBRO PLUTONIC SUITE	SE JEANNE D^ARC PENINSULA	-49.719	-49.719	70.0748	70.0748	SAE			s_MPC99-53A/A_NONLEACHED [11073]	NOT GIVEN [11073]				OLIGOCENE [11073]					VOL					WR [11073]
[11073]	OCEAN ISLAND	KERGUELEN / KERGUELEN ARCHIPELAGO / VAL GABBRO PLUTONIC SUITE	SE JEANNE D^ARC PENINSULA	-49.7276	-49.7276	70.0728	70.0728	SAE			s_MPC99-47 [11073]	NOT GIVEN [11073]				OLIGOCENE [11073]					VOL					WR [11073]
[11073]	OCEAN ISLAND	KERGUELEN / KERGUELEN ARCHIPELAGO / VAL GABBRO PLUTONIC SUITE	SE JEANNE D^ARC PENINSULA	-49.7276	-49.7276	70.0728	70.0728	SAE			s_MPC99-47 [11073]	NOT GIVEN [11073]				OLIGOCENE [11073]					VOL					WR [11073]
[988]	OCEAN ISLAND	KERGUELEN / KERGUELEN ARCHIPELAGO	LORANCHET PENINSULA, NEAR RIGHI MASSIF	-48.55	-49.75	68.5	70.58	SAE			s_8101 [988]	BASALT [988]									VOL					WR [988]	46.53	1.85		15.29		6.27	5.55		11.16	5.55	0.2		0.27	2.29	0.18
[1541]	OCEAN ISLAND	KERGUELEN / KERGUELEN ARCHIPELAGO	EAST RIM OF COOK ICEFIELD	-48.55	-49.75	68.5	70.58	SAE			s_80 [1541]	BASALT [1541]									VOL					WR [1541]	41.02	0.8		21.55		14.35	1.24		4.87	4.74	0.1		0.75	1.78	0.07		2.18	6.17
[1541]	OCEAN ISLAND	KERGUELEN / KERGUELEN ARCHIPELAGO	RIGHT SIDE OF VAL DANIELE	-48.55	-49.75	68.5	70.58	SAE			s_101 [1541]	BASALT [1541]									VOL					WR [1541]	40.94	0.47		21.71		13.65	0.35		2.35	4.02	0.09		0.83	1.13	0.09		5.15	8.15
[1541]	OCEAN ISLAND	KERGUELEN / KERGUELEN ARCHIPELAGO	CLIFF AT THE LEFT SIDE OF VAL DANIELE	-48.55	-49.75	68.5	70.58	SAE			s_110 [1541]	BASALT [1541]									VOL					WR [1541]	51.63	0.3		20.06		10.42	0.28		5.15	3.09	0.07		0.52	2.56	0.01		2.64	2.34
[1541]	OCEAN ISLAND	KERGUELEN / FOCH	PORT MARY BAY	-48.55	-49.75	68.5	70.58	SAE	100	100	s_D9 [1541]	BASALT [1541]									VOL					WR [1541]	35.19	0.45		31.44		13.94	0.77		2.98	1.43	0.1		0.28	0.65	0.07		6.69	1.93
[1541]	OCEAN ISLAND	KERGUELEN / HOWE	CLIFF AT PUFFINS HILL	-48.55	-49.75	68.5	70.58	SAE	160	160	s_F8 [1541]	BASALT [1541]									VOL					WR [1541]	39.73	0.36		19.48		9.8	2		10.2	3.95	0.33		0.4	1.86	0.61		6.32	4.71
[1541]	OCEAN ISLAND	KERGUELEN / HAUTE	CLIFF SOUTHEAST OF MORBIHAN BAY	-48.55	-49.75	68.5	70.58	SAE	160	160	s_119 [1541]	BASALT [1541]									VOL					WR [1541]	46.69	0.31		17.7		7.42	3.38		5.9	12.52	0.31		0.4	1.09	0.6		1.49	2.14
[1541]	OCEAN ISLAND	KERGUELEN / HAUTE	CLIFF SOUTHEAST OF MORBIHAN BAY	-48.55	-49.75	68.5	70.58	SAE	160	160	s_118 [1541]	BASALT [1541]									VOL					WR [1541]	38.48	0.29		20.53		7.55	1.12		7.04	8.63	0.18		1.23	1.45	0.15		7.67	6.08
[1541]	OCEAN ISLAND	KERGUELEN / HAUTE	CLIFF SOUTHEAST OF MORBIHAN BAY	-48.55	-49.75	68.5	70.58	SAE	160	160	s_117 [1541]	BASALT [1541]									VOL					WR [1541]	34.34	0.28		26.5		8.78	0.44		6.68	2.98	0.14		0.15	2.05	0.13		8.5	9.57
[1541]	OCEAN ISLAND	KERGUELEN / HAUTE	CLIFF SOUTHEAST OF MORBIHAN BAY	-48.55	-49.75	68.5	70.58	SAE	160	160	s_116 [1541]	BASALT [1541]									VOL					WR [1541]	41.03	0.3		21.32		7.6	1.65		8.48	6.23	0.09		0.7	2.4	0		6.42	3.84
[1541]	OCEAN ISLAND	KERGUELEN / HAUTE	CLIFF SOUTHEAST OF MORBIHAN BAY	-48.55	-49.75	68.5	70.58	SAE	160	160	s_115 [1541]	BASALT [1541]									VOL					WR [1541]	43.49	0.6		21.53		6.86	1.83		9.61	5.48	0.13		0.9	1.97	0.1		4.49	2.86
[1541]	OCEAN ISLAND	KERGUELEN / HAUTE	CLIFF SOUTHEAST OF MORBIHAN BAY	-48.55	-49.75	68.5	70.58	SAE	160	160	s_311 [1541]	BASALT [1541]									VOL					WR [1541]	35.35	0.39		29.04		13.05	0.57		3.13	0.81	0.07		0.91	0.82	0.07		6.23	9.93
[1541]	OCEAN ISLAND	KERGUELEN / KERGUELEN ARCHIPELAGO	COURBET PENINSULA, MONT DU CHATEAU	-48.55	-49.75	68.5	70.58	SAE	230	230	s_225 [1541]	BASALT [1541]									VOL					WR [1541]	46.45	0.28		18.05		7.47	1.77		9.26	7.98	0.27		0.96	2.66	0.57		2.21	2.09
[1541]	OCEAN ISLAND	KERGUELEN / KERGUELEN ARCHIPELAGO	COURBET PENINSULA, MONT DU CHATEAU	-48.55	-49.75	68.5	70.58	SAE	230	230	s_226 [1541]	BASALT [1541]									VOL					WR [1541]	40.27	0.24		22.04		8.92	0.71		9.21	6.23	0.22		1.6	2.45	0.27		4.24	3.97
[1541]	OCEAN ISLAND	KERGUELEN / KERGUELEN ARCHIPELAGO	COURBET PENINSULA, MONT DU CHATEAU	-48.55	-49.75	68.5	70.58	SAE	230	230	s_226 [1541]	BASALT [1541]									VOL					WR [1541]	31.61	0.34		31.02		11.99	0.38		6.46	1.99	0.11		0.57	1.76	0.23		6	7.38
[1541]	OCEAN ISLAND	KERGUELEN / KERGUELEN ARCHIPELAGO	COURBET PENINSULA, MONT DU CHATEAU	-48.55	-49.75	68.5	70.58	SAE	230	230	s_227 [1541]	BASALT [1541]									VOL					WR [1541]	30.82	0.38		31.74		12.77	0.28		6.94	1.42	0.11		0.28	1.69	0.03		6.25	7.27
[1541]	OCEAN ISLAND	KERGUELEN / KERGUELEN ARCHIPELAGO	COURBET PENINSULA, MONT DU CHATEAU	-48.55	-49.75	68.5	70.58	SAE	230	230	s_227 [1541]	BASALT [1541]									VOL					WR [1541]	39.74	0.2		23.85		9.31	0.8		7.34	4.65	0.1		0.73	2.58	0.02		5.75	6.12
[1541]	OCEAN ISLAND	KERGUELEN / KERGUELEN ARCHIPELAGO	COURBET PENINSULA, MONT DU CHATEAU	-48.55	-49.75	68.5	70.58	SAE	230	230	s_228 [1541]	BASALT [1541]									VOL					WR [1541]	42.92	0.35		18.18		8.51	1.41		7.76	6.75	0.39		0.1	2.6	0.62		6.25	4.17
[14785]	OCEAN ISLAND	KERGUELEN / KERGUELEN ARCHIPELAGO / MOUNT CROZIER		-48.55	-49.75	68.5	70.58	SAE			s_OB93-177 [14785]	BASALT, ALKALINE [14785]									VOL					WR [14785]
[14785]	OCEAN ISLAND	KERGUELEN / KERGUELEN ARCHIPELAGO / MOUNT CROZIER		-48.55	-49.75	68.5	70.58	SAE			s_OB93-177 [14785]	BASALT, ALKALINE [14785]									VOL					WR [14785]
[14785]	OCEAN ISLAND	KERGUELEN / KERGUELEN ARCHIPELAGO / MOUNT CROZIER		-48.55	-49.75	68.5	70.58	SAE			s_OB93-177 [14785]	BASALT, ALKALINE [14785]									VOL					WR [14785]
[14785]	OCEAN ISLAND	KERGUELEN / KERGUELEN ARCHIPELAGO / MOUNT CROZIER		-48.55	-49.75	68.5	70.58	SAE			s_OB93-177 [14785]	BASALT, ALKALINE [14785]									VOL					WR [14785]
[14785]	OCEAN ISLAND	KERGUELEN / KERGUELEN ARCHIPELAGO / MOUNT CROZIER		-48.55	-49.75	68.5	70.58	SAE			s_OB93-177 [14785]	BASALT, ALKALINE [14785]									VOL					WR [14785]
[14785]	OCEAN ISLAND	KERGUELEN / KERGUELEN ARCHIPELAGO / MOUNT CROZIER		-48.55	-49.75	68.5	70.58	SAE			s_OB93-177 [14785]	BASALT, ALKALINE [14785]									VOL					WR [14785]
[14785]	OCEAN ISLAND	KERGUELEN / KERGUELEN ARCHIPELAGO / MOUNT CROZIER		-48.55	-49.75	68.5	70.58	SAE			s_OB93-177 [14785]	BASALT, ALKALINE [14785]									VOL					WR [14785]
[14785]	OCEAN ISLAND	KERGUELEN / KERGUELEN ARCHIPELAGO / MOUNT CROZIER		-48.55	-49.75	68.5	70.58	SAE			s_OB93-202 [14785]	BASALT, ALKALINE [14785]									VOL					WR [14785]
[14785]	OCEAN ISLAND	KERGUELEN / KERGUELEN ARCHIPELAGO / MOUNT CROZIER		-48.55	-49.75	68.5	70.58	SAE			s_OB93-202 [14785]	BASALT, ALKALINE [14785]									VOL					WR [14785]
[14785]	OCEAN ISLAND	KERGUELEN / KERGUELEN ARCHIPELAGO / MOUNT CROZIER		-48.55	-49.75	68.5	70.58	SAE			s_OB93-202 [14785]	BASALT, ALKALINE [14785]									VOL					WR [14785]
[14785]	OCEAN ISLAND	KERGUELEN / KERGUELEN ARCHIPELAGO / MOUNT CROZIER		-48.55	-49.75	68.5	70.58	SAE			s_OB93-202 [14785]	BASALT, ALKALINE [14785]									VOL					WR [14785]
[1634]	OCEAN ISLAND	KERGUELEN / KERGUELEN ARCHIPELAGO	JEANNE D^ARC PENINSULA, RAVIN DU CHARBON, UNIT 3	-48.55	-49.75	68.5	70.58	SAE			s_685 [1634]	BASALT, ALKALINE [1634]									VOL					WR [1634]
[94]	OCEAN ISLAND	KERGUELEN / FOCH		-48.55	-49.75	68.5	70.58	SAE			s_KG5-3 [94]	BASALT [94]									VOL					WR [94]
[999]	OCEAN ISLAND	KERGUELEN / KERGUELEN ARCHIPELAGO	PLATEAU CENTRAL	-48.55	-49.75	68.5	70.58	SAE			s_85-12 [999]	BASALT, TRANSITIONAL [999]									VOL					WR [999]	49.5	2.45		16.47		4.26	6.43		10.44	4.36	0.16		0.72	2.86	0.37
[999]	OCEAN ISLAND	KERGUELEN / KERGUELEN ARCHIPELAGO	MONTS BALLONS	-48.55	-49.75	68.5	70.58	SAE			s_78-74 [999]	BASALT, ALKALINE [999]									VOL					WR [999]	48.15	2.08		17.33		5.35	3.87		5.98	3.39	0.13		3.81	4.52	0.7
[847]	OCEAN ISLAND	KERGUELEN / KERGUELEN ARCHIPELAGO / MOUNT ROSS		-49.58	-49.58	69.5	69.5	SAE			s_54 [847]	TRACHYANDESITE, BASALTIC [847]								FLUIDAL [847]	VOL					WR [847]
[847]	OCEAN ISLAND	KERGUELEN / KERGUELEN ARCHIPELAGO / MOUNT ROSS		-49.58	-49.58	69.5	69.5	SAE			s_130 [847]	TRACHYANDESITE, BASALTIC [847]								FLUIDAL [847]	VOL					WR [847]
[847]	OCEAN ISLAND	KERGUELEN / KERGUELEN ARCHIPELAGO / MOUNT ROSS		-49.58	-49.58	69.5	69.5	SAE			s_38 [847]	TRACHYANDESITE [847]								FLUIDAL [847]	VOL					WR [847]
[847]	OCEAN ISLAND	KERGUELEN / KERGUELEN ARCHIPELAGO / MOUNT ROSS		-49.58	-49.58	69.5	69.5	SAE			s_108 [847]	TRACHYTE [847]								FLUIDAL [847]	VOL					WR [847]
[476][94]	OCEAN ISLAND	KERGUELEN / FOCH		-48.55	-49.75	68.5	70.58	SAE			s_KG6-2 [476]	BASALT [476]									VOL					WR [476]
[1008][5176]	OCEAN ISLAND	KERGUELEN / KERGUELEN ARCHIPELAGO	RONARC^H PENINSULA, WEST FLANK OF VALLEE PHONOLITE	-48.55	-49.75	68.5	70.58	SAE	150	150	s_LVLK70 [1008]	BASALT, ALKALINE [1008] / BASALT [5176]	24800000 [5176]	24800000 [5176]	LOWER [5176]	MIOCENE [5176]					VOL					WR [1008]	47.16	2.42		13.14		3.89	8.38		9.65	10.04	0.18		1.18	2.54	0.33
[1008][5176]	OCEAN ISLAND	KERGUELEN / KERGUELEN ARCHIPELAGO / MOUNT ROUGE	RONARC^H PENINSULA, VALLEE PHONOLITE, WEST FLANK OF MOUNT ROUGE	-48.55	-49.75	68.5	70.58	SAE	150	150	s_LVLK88 [1008]	BASALT, ALKALINE [1008] / BASALT [5176]	24800000 [5176]	24800000 [5176]	LOWER [5176]	MIOCENE [5176]					VOL					WR [1008]	47.74	2.25		11.82		4.09	7.61		10.2	11.6	0.17		1.09	2.35	0.32
[1008]	OCEAN ISLAND	KERGUELEN / KERGUELEN ARCHIPELAGO	JEANNE D^ARC PENINSULA, SOUTH FLANK OF VALLEE DU LEVANT	-48.55	-49.75	68.5	70.58	SAE	200	200	s_LVLK108 [1008]	BASALT, ALKALINE [1008]									VOL					WR [1008]	49.37	3.18		15.26		3.72	8.22		9.46	4.8	0.17		1.4	3.25	0.42
[999]	OCEAN ISLAND	KERGUELEN / KERGUELEN ARCHIPELAGO	PLATEAU CENTRAL	-48.55	-49.75	68.5	70.58	SAE			s_85-06 [999]	BASALT, TRANSITIONAL [999]									VOL					WR [999]	47.97	3.26		13.1		5.19	8.84		9.36	4.75	0.21		0.57	2.68	0.36
[999]	OCEAN ISLAND	KERGUELEN / KERGUELEN ARCHIPELAGO	PLATEAU CENTRAL	-48.55	-49.75	68.5	70.58	SAE			s_85-55 [999]	BASALT, TRANSITIONAL [999]									VOL					WR [999]	44.87	3.3		13.79		6.22	8.25		10.62	5.23	0.21		0.52	2.61	0.35
[999]	OCEAN ISLAND	KERGUELEN / KERGUELEN ARCHIPELAGO	PLATEAU CENTRAL	-48.55	-49.75	68.5	70.58	SAE			s_85-62 [999]	BASALT, TRANSITIONAL [999]									VOL					WR [999]	45.98	3.04		13.13		7.78	5.83		9.63	6.09	0.2		0.95	2.64	0.3
[999]	OCEAN ISLAND	KERGUELEN / KERGUELEN ARCHIPELAGO	PLATEAU CENTRAL	-48.55	-49.75	68.5	70.58	SAE			s_78-26 [999]	BASALT, TRANSITIONAL [999]									VOL					WR [999]	47.38	2.24		17.33		7	2.82		8.91	4.97	0.14		0.51	2.89	0.28
[999]	OCEAN ISLAND	KERGUELEN / KERGUELEN ARCHIPELAGO	JEANNE D^ARC PENINSULA	-48.55	-49.75	68.5	70.58	SAE			s_K47 [999]	BASALT, ALKALINE [999]									VOL					WR [999]	46	2.2		14.5		7.26	4.27		9	10.4	0.16		1	2.7
[999]	OCEAN ISLAND	KERGUELEN / KERGUELEN ARCHIPELAGO	COURBET PENINSULA	-48.55	-49.75	68.5	70.58	SAE			s_77-128 [999]	BASALT, ALKALINE [999]									VOL					WR [999]	47.64	2.77		16.32		4.64	7.9		9.83	4.52	0.17		1.03	3.17	0.45		1.3	0.6
[999]	OCEAN ISLAND	KERGUELEN / KERGUELEN ARCHIPELAGO	COURBET PENINSULA	-48.55	-49.75	68.5	70.58	SAE			s_77-170 [999]	BASALT, ALKALINE [999]									VOL					WR [999]	44.3	3.29		15.8		6.48	7.49		9.83	4.2	0.16		1.19	2.89	0.43		2.1	1.01
[999]	OCEAN ISLAND	KERGUELEN / KERGUELEN ARCHIPELAGO	COURBET PENINSULA, MONT DU CHATEAU	-48.55	-49.75	68.5	70.58	SAE			s_77-194 [999]	BASALT, ALKALINE [999]									VOL					WR [999]	44.41	1.68		9.45		4.08	9.5		9.02	15.78	0.2		0.64	1.86	0.14
[999]	OCEAN ISLAND	KERGUELEN / KERGUELEN ARCHIPELAGO	COURBET PENINSULA, MONT DU CHATEAU	-48.55	-49.75	68.5	70.58	SAE			s_77-198 [999]	BASALT, ALKALINE [999]									VOL					WR [999]	45.94	2		15.49		5.39	7.27		10.36	6.97	0.21		0.99	2.9	0.3		1.07	0.5
[999]	OCEAN ISLAND	KERGUELEN / KERGUELEN ARCHIPELAGO	COURBET PENINSULA, MONT DU CHATEAU	-48.55	-49.75	68.5	70.58	SAE			s_77-204 [999]	BASALT, ALKALINE [999]									VOL					WR [999]	46.85	2.68		15.47		5.66	8.06		9.55	4.73	0.21		1.22	3.18	0.41		1.28	0.59
[999]	OCEAN ISLAND	KERGUELEN / KERGUELEN ARCHIPELAGO	COURBET PENINSULA, MONT DU CHATEAU	-48.55	-49.75	68.5	70.58	SAE			s_77-213 [999]	BASALT, ALKALINE [999]									VOL					WR [999]	47.52	3.23		17.17		5.63	7.5		5.06	4.3	0.17		1.41	3.33	0.49		2.14	0.41
[999]	OCEAN ISLAND	KERGUELEN / KERGUELEN ARCHIPELAGO	COURBET PENINSULA, MONT DU CHATEAU	-48.55	-49.75	68.5	70.58	SAE			s_77-206 [999]	BASALT, ALKALINE [999]									VOL					WR [999]	49.21	1.65		17.71		5.98	5.16		5.74	2.65	0.2		2.89	4.56	0.58		1.68	0.74
[999]	OCEAN ISLAND	KERGUELEN / KERGUELEN ARCHIPELAGO	COURBET PENINSULA	-48.55	-49.75	68.5	70.58	SAE			s_77-129 [999]	BASALT, ALKALINE [999]									VOL					WR [999]	48.37	2.53		16.8		5.15	6.5		8.25	4.21	0.16		1.53	3.37	0.5		1.93	0.73
[999]	OCEAN ISLAND	KERGUELEN / KERGUELEN ARCHIPELAGO / MOUNT CROZIER		-48.55	-49.75	68.5	70.58	SAE			s_77-140 [999]	BASALT, ALKALINE [999]									VOL					WR [999]	43.37	3.37		16.88		5.47	6.77		9.94	4.65	0.18		1.03	3.21	0.63		2.08	1.04
[999]	OCEAN ISLAND	KERGUELEN / KERGUELEN ARCHIPELAGO / MOUNT CROZIER		-48.55	-49.75	68.5	70.58	SAE			s_77-136 [999]	BASALT, ALKALINE [999]									VOL					WR [999]	45	3.12		16.14		6.27	6.85		8.6	4	0.2		1.95	3.63	0.64		1.87	0.61
[999]	OCEAN ISLAND	KERGUELEN / KERGUELEN ARCHIPELAGO / MOUNT CROZIER		-48.55	-49.75	68.5	70.58	SAE			s_77-180 [999]	BASALT, ALKALINE [999]									VOL					WR [999]	45.83	2.58		15.64		5.9	4.62		5.32	3.17	0.16		2.66	3.91	0.89
[999]	OCEAN ISLAND	KERGUELEN / KERGUELEN ARCHIPELAGO	COURBET PENINSULA	-48.55	-49.75	68.5	70.58	SAE			s_77-98 [999]	BASALT, ALKALINE [999]									VOL					WR [999]	46.63	2.79		15.89		3.99	9.09		9.91	4.47	0.19		1.03	2.76	0.37		1.36	0.43
[999]	OCEAN ISLAND	KERGUELEN / KERGUELEN ARCHIPELAGO		-48.55	-49.75	68.5	70.58	SAE			s_80-04 [999]	BASALT, ALKALINE [999]									VOL					WR [999]	48.71	2.45		16.09		6.07	3.95		7.16	3.34	0.17		3.19	3.32	1.07
[5177][6568]	OCEAN ISLAND	KERGUELEN / KERGUELEN ARCHIPELAGO / MONT DES RUCHES	LORANCHET PENINSULA	-48.87	-48.87	68.96	68.96	SAE	497	497	s_BY96-24 [5177]	BASALT [5177]	28200000 [6568]	28200000 [6568]						OLIVINE PHYRIC, SUBOPHITIC GROUNDMASS [5177]	VOL			F		WR [5177]	48.17	1.31		15.23				11	10.87	9.26	0.19		0.64	2.21	0.19
[5177][14785][6568]	OCEAN ISLAND	KERGUELEN / KERGUELEN ARCHIPELAGO / MONT DES RUCHES	LORANCHET PENINSULA	-48.87	-48.87	68.96	68.96	SAE	455	455	s_BY96-27 [5177]	BASALT [5177] / BASALT, TRANSITIONAL [14785]	28200000 [6568]	28200000 [6568]							VOL					WR [5177]	46.9	1.86		14.37				11.24	10.39	10.65	0.18		0.72	2.16	0.26
[5177][14785][6568]	OCEAN ISLAND	KERGUELEN / KERGUELEN ARCHIPELAGO / MONT DES RUCHES	LORANCHET PENINSULA	-48.87	-48.87	68.96	68.96	SAE	408	408	s_BY96-31 [5177]	BASALT [5177] / BASALT, TRANSITIONAL [14785]	28200000 [6568]	28200000 [6568]						APHYRIC, MICROLITIC GROUNDMASS [5177]	VOL			E		WR [5177]	49.91	3.38		13.14				13.7	8.43	4.31	0.19		1.21	2.84	0.42
[5177][6568]	OCEAN ISLAND	KERGUELEN / KERGUELEN ARCHIPELAGO / MONT DES RUCHES	LORANCHET PENINSULA	-48.87	-48.87	68.96	68.96	SAE	328	328	s_BY96-34 [5177]	BASALT [5177]	28200000 [6568]	28200000 [6568]						OLIVINE PHYRIC, DOLERITIC GROUNDMASS [5177]	VOL			F		WR [5177]	46.6	1.85		14.46				10.64	10.61	10.87	0.18		1.13	2.18	0.36
[5177][6568]	OCEAN ISLAND	KERGUELEN / KERGUELEN ARCHIPELAGO / MONT DES RUCHES	LORANCHET PENINSULA	-48.87	-48.87	68.96	68.96	SAE	10	10	s_BY96-45 [5177]	BASALT [5177]	28200000 [6568]	28200000 [6568]						PLAGIOCLASE-PHYRIC [5177]	VOL			S		WR [5177]	50.15	2.51		16.17				10.79	10.14	4.16	0.14		0.81	2.95	0.58
[5177][6568]	OCEAN ISLAND	KERGUELEN / KERGUELEN ARCHIPELAGO / MONT DES RUCHES	LORANCHET PENINSULA	-48.87	-48.87	68.96	68.96	SAE	0	0	s_BY96-46 [5177]	BASALT [5177]	28200000 [6568]	28200000 [6568]						APHYRIC, TRACHYTIC GROUNDMASS [5177]	VOL			F		WR [5177]	50.34	3.69		13.15				13.51	8.24	4.15	0.21		1.36	2.85	0.53
[5177][6568]	OCEAN ISLAND	KERGUELEN / KERGUELEN ARCHIPELAGO / MONT FONTAINE	LORANCHET PENINSULA	-48.85	-48.85	69.13	69.13	SAE	325	325	s_BY96-80 [5177]	BASALT [5177]	28000000 [6568]	28000000 [6568]						OLIVINE PHYRIC, DOLERITIC GROUNDMASS [5177]	VOL			F		WR [5177]	46.67	1.9		14.59				10.95	11.08	10.25	0.19		0.84	2.13	0.29
[5177][6568]	OCEAN ISLAND	KERGUELEN / KERGUELEN ARCHIPELAGO / MONT FONTAINE	LORANCHET PENINSULA	-48.85	-48.85	69.13	69.13	SAE	320	320	s_BY96-82 [5177]	BASALT [5177]	28000000 [6568]	28000000 [6568]						OLIVINE PHYRIC, SUBOPHITIC GROUNDMASS [5177]	VOL			F		WR [5177]	46.7	2.63		15.42				13.78	9.91	7.52	0.2		0.24	2.19	0.19
[5177][14785][6568]	OCEAN ISLAND	KERGUELEN / KERGUELEN ARCHIPELAGO / MONT FONTAINE	LORANCHET PENINSULA	-48.85	-48.85	69.13	69.13	SAE	300	300	s_BY96-86 [5177]	BASALT [5177] / BASALT, TRANSITIONAL [14785]	28000000 [6568]	28000000 [6568]						OLIVINE PHYRIC, SUBOPHITIC GROUNDMASS [5177]	VOL			F		WR [5177]	45.87	1.52		14.11				11.36	10.7	11.5	0.19		0.77	1.94	0.23
[5177][6568]	OCEAN ISLAND	KERGUELEN / KERGUELEN ARCHIPELAGO / MONT FONTAINE	LORANCHET PENINSULA	-48.85	-48.85	69.13	69.13	SAE	225	225	s_BY96-89 [5177]	BASALT [5177]	28000000 [6568]	28000000 [6568]						OLIVINE PHYRIC, SUBOPHITIC GROUNDMASS [5177]	VOL			M		WR [5177]	46.67	1.09		14.35				11.35	9.06	13.32	0.17		0.09	1.98	0.08
[5177][6568]	OCEAN ISLAND	KERGUELEN / KERGUELEN ARCHIPELAGO / MONT FONTAINE	LORANCHET PENINSULA	-48.85	-48.85	69.13	69.13	SAE	130	130	s_BY96-98 [5177]	BASALT [5177]	28000000 [6568]	28000000 [6568]						OLIVINE PHYRIC, DOLERITIC GROUNDMASS [5177]	VOL			S		WR [5177]	47.25	1.77		13.79				10.83	10.54	11.56	0.18		0.57	1.97	0.26
[5174][5176]	OCEAN ISLAND	KERGUELEN / KERGUELEN ARCHIPELAGO / MOUNT DE LA TOURMENTE		-49.5	-49.5	70.5	70.5	SAE	597	597	s_93-351 [5174]	BASALT, ALKALINE [5174] / BASALT [5176]	26000000 [5176]	26000000 [5176]		CENOZOIC [5174]					VOL					WR [5174]	46.62	3.96		13.68				14.53	9.85	5.38	0.36		0.62	2.79	0.46
[5174][5176]	OCEAN ISLAND	KERGUELEN / KERGUELEN ARCHIPELAGO / MOUNT DE LA TOURMENTE		-49.5	-49.5	70.5	70.5	SAE	577	577	s_93-352 [5174]	BASALT, TRANSITIONAL [5174] / BASALT [5176]	26000000 [5176]	26000000 [5176]		CENOZOIC [5174]					VOL					WR [5174]	47.85	3.84		13.1				14.22	9.88	4.98	0.24		0.66	2.76	0.45
[5174][5176]	OCEAN ISLAND	KERGUELEN / KERGUELEN ARCHIPELAGO / MOUNT DE LA TOURMENTE		-49.5	-49.5	70.5	70.5	SAE	537	537	s_93-356 [5174]	BASALT, ALKALINE [5174] / BASALT [5176]	26000000 [5176]	26000000 [5176]		CENOZOIC [5174]					VOL					WR [5174]	46.97	4.22		13.33				14.76	9.53	4.81	0.24		1.11	3.03	0.48
[5174][5176]	OCEAN ISLAND	KERGUELEN / KERGUELEN ARCHIPELAGO / MOUNT DE LA TOURMENTE		-49.5	-49.5	70.5	70.5	SAE	232	232	s_93-392 [5174]	BASALT, TRANSITIONAL [5174] / BASALT [5176]	26000000 [5176]	26000000 [5176]		CENOZOIC [5174]					VOL					WR [5174]	49.78	3.24		14.02				12.36	9.8	5.52	0.21		0.5	2.88	0.43
[5174][5176]	OCEAN ISLAND	KERGUELEN / KERGUELEN ARCHIPELAGO / MOUNT DE LA TOURMENTE		-49.5	-49.5	70.5	70.5	SAE	130	130	s_93-404 [5174]	BASALT, TRANSITIONAL [5174] / BASALT [5176]	26000000 [5176]	26000000 [5176]		CENOZOIC [5174]					VOL					WR [5174]	48.36	2.89		14.36				12.08	11.04	6.38	0.21		0.25	2.62	0.31
[5174][5176]	OCEAN ISLAND	KERGUELEN / KERGUELEN ARCHIPELAGO / MOUNT DE LA TOURMENTE		-49.5	-49.5	70.5	70.5	SAE	16	16	s_93-414 [5174]	BASALT, TRANSITIONAL [5174] / BASALT [5176]	26000000 [5176]	26000000 [5176]		CENOZOIC [5174]					VOL					WR [5174]	50.25	3.3		13.57				13.11	8.86	4.63	0.21		0.88	3.12	0.45
[5176]	OCEAN ISLAND	KERGUELEN / KERGUELEN ARCHIPELAGO / MOUNT CROZIER		-48.55	-49.75	68.5	70.58	SAE			s_OB93-136 [5176]	BASALT [5176]	24800000 [5176]	24800000 [5176]							VOL					WR [5176]
[5176]	OCEAN ISLAND	KERGUELEN / KERGUELEN ARCHIPELAGO / MOUNT CROZIER		-48.55	-49.75	68.5	70.58	SAE			s_OB93-147 [5176]	BASALT [5176]	24800000 [5176]	24800000 [5176]							VOL					WR [5176]
[5176][14756][14785]	OCEAN ISLAND	KERGUELEN / KERGUELEN ARCHIPELAGO / MOUNT CROZIER		-48.55	-49.75	68.5	70.58	SAE			s_OB93-165 [5176]	BASALT [5176] / BASALT, ALKALINE [14756]	24800000 [5176]	24800000 [5176]							VOL					WR [5176]
[990][989][515]	OCEAN ISLAND	KERGUELEN / KERGUELEN ARCHIPELAGO	COURBET PENINSULA	-48.55	-49.75	68.5	70.58	SAE			s_3308 [990]	BASALT [990] / BASALT, NEPHELINE [989]	20000000 [990]	20000000 [990]							VOL					WR [990]
[990][989][515]	OCEAN ISLAND	KERGUELEN / KERGUELEN ARCHIPELAGO	JEANNE D^ARC PENINSULA	-48.55	-49.75	68.5	70.58	SAE			s_3312 [990]	BASALT, ALKALINE [990]	8400000 [990]	8400000 [990]							VOL					WR [990]
[990][989][515]	OCEAN ISLAND	KERGUELEN / KERGUELEN ARCHIPELAGO / SHIELD STAGE	LORANCHET PENINSULA	-49	-49	69	69	SAE			s_3315 [990]	BASANITE [990]	15000000 [990]	15000000 [990]							VOL					WR [990]
[990][989][515]	OCEAN ISLAND	KERGUELEN / KERGUELEN ARCHIPELAGO	COOK ICEFIELD	-48.55	-49.75	68.5	70.58	SAE			s_3319 [990]	BASALT, ALKALINE [990]	16000000 [990]	16000000 [990]							VOL					WR [990]
[11370]	OCEAN ISLAND	KERGUELEN / KERGUELEN ARCHIPELAGO / MOUNT ROSS	DOIGT-STE-ANNE	-49.58	-49.58	69.5	69.5	SAE			s_K24 [11370]	TRACHYTE, NEPHELINE [11370]				QUATERNARY [11370]					VOL					WR [11370]	61.4	0		18.5		3.28	1.01		0.7	0.03	0.18		5.6	8			0.85	0.28
[11370]	OCEAN ISLAND	KERGUELEN / KERGUELEN ARCHIPELAGO / MOUNT ROSS	TABLE BOISGUEHENNEUC	-49.58	-49.58	69.5	69.5	SAE			s_K30 [11370]	TRACHYTE, NEPHELINE [11370]				QUATERNARY [11370]					VOL					WR [11370]	58.05	0.4		18.45		2.59	3.84		2.25	0.54	0.18		6.85	5.65			0.01	0.2
[11370]	OCEAN ISLAND	KERGUELEN / KERGUELEN ARCHIPELAGO / MOUNT THOMPSON	RONARC^H PENINSULA,	-48.55	-49.75	68.5	70.58	SAE			s_K120 [11370]	PHONOLITE [11370]				MIOCENE [11370]					VOL					WR [11370]	51.7	0.5		20.1		2.71	0.8		1.7	0.66	0.12		6.6	9			4.15	0.97
[11370]	OCEAN ISLAND	KERGUELEN / KERGUELEN ARCHIPELAGO	RONARC^H PENINSULA	-48.55	-49.75	68.5	70.58	SAE	655	655	s_K150 [11370]	NEPHELINITE [11370]				MIOCENE [11370]					VOL					WR [11370]	46.5	3		16.4		4.99	5.5		6.2	4.4	0.2		4.1	5.8			1.61	0.45
[11370]	OCEAN ISLAND	KERGUELEN / KERGUELEN ARCHIPELAGO	OREILLES DE CHAT EXTRUSION, RONARC^H PENINSULA	-48.55	-49.75	68.5	70.58	SAE			s_K107 [11370]	PHONOLITE [11370]				MIOCENE [11370]					VOL					WR [11370]	54.55	0.5		21.45		2.29	1.45		1.1	0.47	0.13		6.5	9.2			0.87	0.16
[11370]	OCEAN ISLAND	KERGUELEN / KERGUELEN ARCHIPELAGO / MOUNT TIZZARD	JEANNE D^ARC PENINSULA	-48.55	-49.75	68.5	70.58	SAE			s_K84 [11370]	PHONOLITE [11370]				MIOCENE [11370]					VOL					WR [11370]	56.65	0.15		21.55		2.23	0.6		0.85	0.18	0.14		6.1	9.1			1.29	0.19
[11370]	OCEAN ISLAND	KERGUELEN / KERGUELEN ARCHIPELAGO	RONARC^H PENINSULA	-48.55	-49.75	68.5	70.58	SAE	0	0	s_K138 [11370]	BASALT, ALKALINE [11370]				MIOCENE [11370]					VOL					WR [11370]	46.8	3.5		16.9		5.7	7.39		6.1	4.6	0.15		1.85	3.5			1.54	1.11
[11370]	OCEAN ISLAND	KERGUELEN / KERGUELEN ARCHIPELAGO / MOUNT BRANCA	GALLIENI UNIT	-49.58	-49.58	69.5	69.5	SAE	0	0	s_K72 [11370]	BASALT, ALKALINE, OLIVINE [11370]				MIOCENE [11370]					VOL					WR [11370]	45.4	3.2		16.5		4.68	8.4		8.3	6.9	0.19		1.1	2.8			1	0.69
[11370]	OCEAN ISLAND	KERGUELEN / KERGUELEN ARCHIPELAGO / MOUNT BRANCA	GALLIENI UNIT	-49.58	-49.58	69.5	69.5	SAE	850	850	s_K34 [11370]	BASALT, ALKALINE [11370]				MIOCENE [11370]					VOL					WR [11370]	47.6	3.3		15.2		7.62	4.49		10	7.3	0.17		1.7	2.6			0.35	0.37
[11370]	OCEAN ISLAND	KERGUELEN / KERGUELEN ARCHIPELAGO / MOUNT BRANCA	GALLIENI UNIT	-49.58	-49.58	69.5	69.5	SAE	0	0	s_K72 [11370]	BASALT, ALKALINE [11370]				MIOCENE [11370]					VOL					WR [11370]	46	2.2		14.5		7.26	4.27		9	10.4	0.16		1	2.7			1.78	1.16
[4681]	OCEAN ISLAND	KERGUELEN / KERGUELEN ARCHIPELAGO	RONARC^H PENINSULA, VAL PHONOLITE	-48.55	-49.75	68.5	70.58	SAE	150	150	s_GM92-165 [4681]	PYROXENITE, GARNET [4681]								CUMULATE [4681]	PLU					WR [4681]	46.2	1.95		10.46			9.23		16.91	12.42	0.16		0.12	1.65	0.04		0.69	0.06		0.11
[990][989]	OCEAN ISLAND	KERGUELEN / KERGUELEN ARCHIPELAGO	RALLIER DU BATY PENINSULA	-48.55	-49.75	68.5	70.58	SAE			s_2623 [990]	GABBRO [990]	14000000 [990]	14000000 [990]							PLU					WR [990]
[990][989]	OCEAN ISLAND	KERGUELEN / KERGUELEN ARCHIPELAGO		-48.55	-49.75	68.5	70.58	SAE			s_2625 [990]	GABBRO [990]	14000000 [990]	14000000 [990]							PLU					WR [990]
[989][990]	OCEAN ISLAND	KERGUELEN / KERGUELEN ARCHIPELAGO	RALLIER DU BATY PENINSULA	-48.55	-49.75	68.5	70.58	SAE			s_2612 [989]	GRANITE [989]	5000000 [989]	5000000 [989]							PLU					WR [989]
[990][989]	OCEAN ISLAND	KERGUELEN / KERGUELEN ARCHIPELAGO	RALLIER DU BATY PENINSULA, RING COMPLEXES	-48.55	-49.75	68.5	70.58	SAE			s_2682 [990]	GABBRO [990] / SYENITE [989]	8600000 [990]	8600000 [990]							PLU					WR [990]
[990][989]	OCEAN ISLAND	KERGUELEN / KERGUELEN ARCHIPELAGO	RALLIER DU BATY PENINSULA	-48.55	-49.75	68.5	70.58	SAE			s_2608 [990]	GABBRO [990]	14000000 [990]	14000000 [990]							PLU					WR [990]
[990][989]	OCEAN ISLAND	KERGUELEN / KERGUELEN ARCHIPELAGO	RALLIER DU BATY PENINSULA	-48.55	-49.75	68.5	70.58	SAE			s_2618 [990]	GABBRO [990]	14000000 [990]	14000000 [990]							PLU					WR [990]
[990][989]	OCEAN ISLAND	KERGUELEN / KERGUELEN ARCHIPELAGO	COURBET PENINSULA	-48.55	-49.75	68.5	70.58	SAE			s_3310 [990]	GABBRO [990] / GABBRO, NEPHELINE [989]	20000000 [990]	20000000 [990]							PLU					WR [990]
[847][5176]	OCEAN ISLAND	KERGUELEN / KERGUELEN ARCHIPELAGO / MOUNT ROSS		-49.58	-49.58	69.5	69.5	SAE			s_121 [847]	GABBRO [847]		2000000 [5176]						DOLERITIC [847]	PLU					WR [847]	46.55	3.41		17.27				10.64	8.43	5.32	0.16		2.37	3.74	0.65
[6188]	OCEAN ISLAND	KERGUELEN / KERGUELEN ARCHIPELAGO	RALLIER DU BATY PENINSULA, NORTHERN RING COMPLEX, DOME CARVA	-48.55	-49.75	68.5	70.58	SAE			s_MM94-488 [6188]	MONZONITE [6188]									PLU					WR [6188]	54.66	1.63		17.79				9.8	4.27	1.43	0.16		3.32	5.18	0.38
[6188]	OCEAN ISLAND	KERGUELEN / KERGUELEN ARCHIPELAGO	RALLIER DU BATY PENINSULA, NORTHERN RING COMPLEX, DOME CARVA	-48.55	-49.75	68.5	70.58	SAE			s_MM94-489 [6188]	MONZOGABBRO [6188]									PLU					WR [6188]	50.92	2.69		15.67				11.39	7.49	3.4	0.17		2.12	4.16	0.69
[6188]	OCEAN ISLAND	KERGUELEN / KERGUELEN ARCHIPELAGO	RALLIER DU BATY PENINSULA, NORTHERN RING COMPLEX, DOME CARVA	-48.55	-49.75	68.5	70.58	SAE			s_MM94-491 [6188]	MONZOGABBRO [6188]									PLU					WR [6188]	52.55	2.1		16.67				10.61	5.92	2.61	0.15		2.96	4.09	0.78
[6188]	OCEAN ISLAND	KERGUELEN / KERGUELEN ARCHIPELAGO	RALLIER DU BATY PENINSULA, NORTHERN RING COMPLEX, DOME CARVA	-48.55	-49.75	68.5	70.58	SAE			s_MM94-551 [6188]	MONZOGABBRO [6188]									PLU					WR [6188]	50.06	2.11		17.55				12.63	7.04	2.99	0.24		1.6	3.85	0.74
[6188]	OCEAN ISLAND	KERGUELEN / KERGUELEN ARCHIPELAGO	RALLIER DU BATY PENINSULA, NORTHERN RING COMPLEX, UNIT 4	-48.55	-49.75	68.5	70.58	SAE			s_MM94-452 [6188]	SYENITE [6188]									PLU					WR [6188]	60.77	0.94		17.34				3.73	1.88	0.71	0.1		6.71	5.78	0.3
[6188]	OCEAN ISLAND	KERGUELEN / KERGUELEN ARCHIPELAGO	RALLIER DU BATY PENINSULA, NORTHERN RING COMPLEX, UNIT 5	-48.55	-49.75	68.5	70.58	SAE			s_MM94-555 [6188]	SYENITE [6188]									PLU					WR [6188]	64.78	0.7		14.81				5.55	0.63	0.31	0.21		5.12	5.5	0.07
[6188]	OCEAN ISLAND	KERGUELEN / KERGUELEN ARCHIPELAGO	RALLIER DU BATY PENINSULA, NORTHERN RING COMPLEX, UNIT 6	-48.55	-49.75	68.5	70.58	SAE			s_MM94-569 [6188]	SYENITE [6188]									PLU					WR [6188]	58.81	1.17		16				6.16	3.03	1.14	0.19		5.5	4.51	0.41
[988][502]	OCEAN ISLAND	KERGUELEN / KERGUELEN ARCHIPELAGO / VAL GABBRO PLUTONIC SUITE	SE JEANNE D^ARC PENINSULA	-48.55	-49.75	68.5	70.58	SAE			s_K90 [988]	GABBRO [988] / GABBRO, CLINOPYROXENE-OLIVINE [502]	39000000 [988]	39000000 [988]							PLU					WR [988]	40.55	2.95		18.02		10	6.61		12.7	6.55	0.2		0.33	1.22	0.17		1.44	0.14
[1002]	OCEAN ISLAND	KERGUELEN / KERGUELEN ARCHIPELAGO / MOUNT TIZZARD	JEANNE D^ARC PENINSULA	-48.55	-49.75	68.5	70.58	SAE			s_GM-92-406 [1002]	GABBRO, GARNET [1002]								HETEROGRANULAR GRANOBLASTIC-MOSAIC [1002]	PLU					WR [1002]
[59]	OCEAN ISLAND	KERGUELEN / KERGUELEN ARCHIPELAGO	PORT JEANNE D^ARC	-48.55	-49.75	68.5	70.58	SAE			s_HC93337 [59]	GABBRO [59]									PLU				HE3_HE4(R/R(A)) from OLIVINE [59]	MIN [59]
[989]	OCEAN ISLAND	KERGUELEN / KERGUELEN ARCHIPELAGO	RALLIER DU BATY PENINSULA	-48.55	-49.75	68.5	70.58	SAE			s_2603 [989]	GRANITE [989]	7900000 [989]	7900000 [989]							PLU					WR [989]
[1348]	OCEAN ISLAND	KERGUELEN / KERGUELEN ARCHIPELAGO	RALLIER DU BATY PLUTON	-48.55	-49.75	68.5	70.58	SAE			s_18 [1348]	SYENITE [1348]									PLU					WR [1348]	63.19	0.32		17.4		2.51	1.53		0.97	0.84	0.09		5.31	5.64	0.23
[1348]	OCEAN ISLAND	KERGUELEN / KERGUELEN ARCHIPELAGO	COURBET PENINSULA AT MOUNT VERTES, NORTH OF VAL STUDER	-48.55	-49.75	68.5	70.58	SAE			s_20T-5 [1348]	GABBRO [1348]									PLU					WR [1348]
[1348]	OCEAN ISLAND	KERGUELEN / KERGUELEN ARCHIPELAGO	RALLIER DU BATY PENINSULA	-48.55	-49.75	68.5	70.58	SAE			s_20E-5 [1348]	GABBRO [1348]									PLU					WR [1348]
[1348]	OCEAN ISLAND	KERGUELEN / KERGUELEN ARCHIPELAGO	RALLIER DU BATY PENINSULA	-48.55	-49.75	68.5	70.58	SAE			s_20F-8 [1348]	GABBRO [1348]									PLU					WR [1348]
[1348]	OCEAN ISLAND	KERGUELEN / KERGUELEN ARCHIPELAGO	RALLIER DU BATY PENINSULA	-48.55	-49.75	68.5	70.58	SAE			s_20F-15 [1348]	GABBRO [1348]									PLU					WR [1348]
[1400]	OCEAN ISLAND	KERGUELEN / KERGUELEN ARCHIPELAGO	RALLIER DU BATY PENINSULA	-48.55	-49.75	68.5	70.58	SAE			s_1 [1400]	SYENITE [1400]									PLU					WR [1400]	65.24	0.6		15.93		1.68	2.85		1	0.08	0.14		5.28	6.27			0.35	1.01
[847]	OCEAN ISLAND	KERGUELEN / KERGUELEN ARCHIPELAGO / MOUNT ROSS		-49.58	-49.58	69.5	69.5	SAE			s_145 [847]	GABBRO [847]								DOLERITIC [847]	PLU					WR [847]	47.71	1.75		16.31				10.28	10.92	7.32	0.17		0.8	2.95	0.22
[847]	OCEAN ISLAND	KERGUELEN / KERGUELEN ARCHIPELAGO / MOUNT ROSS		-49.58	-49.58	69.5	69.5	SAE			s_83 [847]	GABBRO [847]								DOLERITIC [847]	PLU					WR [847]	49.71	1.66		15.96				9.93	10.44	6.39	0.15		0.96	3.23	0.23
[847]	OCEAN ISLAND	KERGUELEN / KERGUELEN ARCHIPELAGO / MOUNT ROSS		-49.58	-49.58	69.5	69.5	SAE			s_78 [847]	GABBRO [847]								DOLERITIC [847]	PLU					WR [847]	51.5	2.48		15.48				9.12	9.44	6.27	0.14		1.1	3.04	0.32
[847]	OCEAN ISLAND	KERGUELEN / KERGUELEN ARCHIPELAGO / MOUNT ROSS		-49.58	-49.58	69.5	69.5	SAE			s_91 [847]	GABBRO [847]								DOLERITIC [847]	PLU					WR [847]	51.14	2.45		17.27				8.47	6.91	4.29	0.12		2.66	4.77	0.63
[847]	OCEAN ISLAND	KERGUELEN / KERGUELEN ARCHIPELAGO / MOUNT ROSS		-49.58	-49.58	69.5	69.5	SAE			s_64.1 [847]	GABBRO [847]								DOLERITIC [847]	PLU					WR [847]	49.22	2.59		16.79				10.54	6.28	3.85	0.19		3.3	4.36	1.29
[847]	OCEAN ISLAND	KERGUELEN / KERGUELEN ARCHIPELAGO / MOUNT ROSS		-49.58	-49.58	69.5	69.5	SAE			s_61 [847]	SYENITE [847]									PLU					WR [847]	59.35	0.64		18.45				5.33	2.7	0.83	0.16		5.78	5.45	0.26
[847]	OCEAN ISLAND	KERGUELEN / KERGUELEN ARCHIPELAGO / MOUNT ROSS		-49.58	-49.58	69.5	69.5	SAE			s_112 [847]	SYENITE [847]									PLU					WR [847]	61.92	0.125		18.21				4.23	1.3	0.09	0.18		5.52	7.32	0.037
[1398]	OCEAN ISLAND	KERGUELEN / KERGUELEN ARCHIPELAGO / MONT DU VOLTZ	RALLIER DU BATY PENINSULA	-48.55	-49.75	68.5	70.58	SAE			s_375 [1398]	GRANITE, ALKALINE [1398]									PLU					WR [1398]	62.33	0.1		21.28		3.19	0.95		1.01	1.15	0.12		3.72	3.33	0.19		0.11	1.68
[1398]	OCEAN ISLAND	KERGUELEN / KERGUELEN ARCHIPELAGO / MONT DU VOLTZ	RALLIER DU BATY PENINSULA	-48.55	-49.75	68.5	70.58	SAE			s_A3 [1398]	SYENITE, ALKALINE [1398]									PLU					WR [1398]	58.73	0.12		21.88		2.01	1.52		1.02	1.08	0.11		5.18	5.91	0.1		0.72	1.18
[502]	OCEAN ISLAND	KERGUELEN / KERGUELEN ARCHIPELAGO / VAL GABBRO PLUTONIC SUITE	SE JEANNE D^ARC PENINSULA	-48.55	-49.75	68.5	70.58	SAE			s_K92 [502]	GABBRO, CLINOPYROXENE-OLIVINE [502]									PLU					WR [502]
[502]	OCEAN ISLAND	KERGUELEN / KERGUELEN ARCHIPELAGO / VAL GABBRO PLUTONIC SUITE	SE JEANNE D^ARC PENINSULA	-48.55	-49.75	68.5	70.58	SAE			s_K94 [502]	GABBRO, CLINOPYROXENE-OLIVINE [502]									PLU					WR [502]
[502]	OCEAN ISLAND	KERGUELEN / KERGUELEN ARCHIPELAGO / VAL GABBRO PLUTONIC SUITE	SE JEANNE D^ARC PENINSULA	-48.55	-49.75	68.5	70.58	SAE			s_82.247 [502]	PERIDOTITE [502]									PLU					WR [502]
[502]	OCEAN ISLAND	KERGUELEN / KERGUELEN ARCHIPELAGO / VAL GABBRO PLUTONIC SUITE	SE JEANNE D^ARC PENINSULA	-48.55	-49.75	68.5	70.58	SAE			s_78.08 [502]	MONZONITE [502]									PLU					WR [502]
[502]	OCEAN ISLAND	KERGUELEN / KERGUELEN ARCHIPELAGO / VAL GABBRO PLUTONIC SUITE	SE JEANNE D^ARC PENINSULA	-48.55	-49.75	68.5	70.58	SAE			s_78.13 [502]	SYENITE, QUARTZ [502]									PLU					WR [502]
[502]	OCEAN ISLAND	KERGUELEN / KERGUELEN ARCHIPELAGO / VAL GABBRO PLUTONIC SUITE	SE JEANNE D^ARC PENINSULA	-48.55	-49.75	68.5	70.58	SAE			s_78.06 [502]	SYENITE, QUARTZ [502]									PLU					WR [502]
[502]	OCEAN ISLAND	KERGUELEN / KERGUELEN ARCHIPELAGO	ANSE DU JARDIN	-48.55	-49.75	68.5	70.58	SAE			s_81.28 [502]	GABBRO [502]									PLU					WR [502]
[502]	OCEAN ISLAND	KERGUELEN / KERGUELEN ARCHIPELAGO	ANSE DU JARDIN	-48.55	-49.75	68.5	70.58	SAE			s_81.25 [502]	GABBRO [502]								PORPHYRITIC [502]	PLU					WR [502]
[502]	OCEAN ISLAND	KERGUELEN / KERGUELEN ARCHIPELAGO	ANSE DU JARDIN	-48.55	-49.75	68.5	70.58	SAE			s_81.262 [502]	GABBRO [502]								PORPHYRITIC [502]	PLU					WR [502]
[502]	OCEAN ISLAND	KERGUELEN / KERGUELEN ARCHIPELAGO		-48.55	-49.75	68.5	70.58	SAE			s_80.25 [502]	GABBRO, BIOTITE [502]									PLU					WR [502]
[502]	OCEAN ISLAND	KERGUELEN / KERGUELEN ARCHIPELAGO		-48.55	-49.75	68.5	70.58	SAE			s_80.121 [502]	GABBRO [502]									PLU					WR [502]
[502]	OCEAN ISLAND	KERGUELEN / KERGUELEN ARCHIPELAGO		-48.55	-49.75	68.5	70.58	SAE			s_80.76 [502]	MONZOGABBRO [502]									PLU					WR [502]
[502]	OCEAN ISLAND	KERGUELEN / KERGUELEN ARCHIPELAGO		-48.55	-49.75	68.5	70.58	SAE			s_80.31 [502]	MONZOGABBRO [502]									PLU					WR [502]
[502]	OCEAN ISLAND	KERGUELEN / KERGUELEN ARCHIPELAGO		-48.55	-49.75	68.5	70.58	SAE			s_80.102 [502]	GRANITE [502]									PLU					WR [502]
[502]	OCEAN ISLAND	KERGUELEN / KERGUELEN ARCHIPELAGO		-48.55	-49.75	68.5	70.58	SAE			s_80.99 [502]	GRANITE, ALKALINE [502]									PLU					WR [502]
[502]	OCEAN ISLAND	KERGUELEN / KERGUELEN ARCHIPELAGO		-48.55	-49.75	68.5	70.58	SAE			s_80.147 [502]	SYENITE [502]								MIAROLITIC [502]	PLU					WR [502]
[502]	OCEAN ISLAND	KERGUELEN / KERGUELEN ARCHIPELAGO		-48.55	-49.75	68.5	70.58	SAE			s_80.146 [502]	SYENITE [502]								PORPHYRITIC [502]	PLU					WR [502]
[502]	OCEAN ISLAND	KERGUELEN / KERGUELEN ARCHIPELAGO		-48.55	-49.75	68.5	70.58	SAE			s_80.148 [502]	SYENITE [502]									PLU					WR [502]
[502]	OCEAN ISLAND	KERGUELEN / KERGUELEN ARCHIPELAGO	MONTS BALLONS	-48.55	-49.75	68.5	70.58	SAE			s_78.49C [502]	SYENITE, NEPHELINE [502]									PLU					WR [502]
[502]	OCEAN ISLAND	KERGUELEN / KERGUELEN ARCHIPELAGO	MONTS BALLONS	-48.55	-49.75	68.5	70.58	SAE			s_78.57 [502]	SYENITE [502]									PLU					WR [502]
[502]	OCEAN ISLAND	KERGUELEN / KERGUELEN ARCHIPELAGO	MONTS BALLONS	-48.55	-49.75	68.5	70.58	SAE			s_78.66 [502]	SYENITE, ALKALINE, NEPHELINE [502]									PLU					WR [502]
[502]	OCEAN ISLAND	KERGUELEN / KERGUELEN ARCHIPELAGO	MONTS BALLONS	-48.55	-49.75	68.5	70.58	SAE			s_78.69 [502]	MONZONITE [502]									PLU					WR [502]
[502]	OCEAN ISLAND	KERGUELEN / KERGUELEN ARCHIPELAGO	COURBET PENINSULA, MONTAGNES VERTES	-48.55	-49.75	68.5	70.58	SAE			s_77.9 [502]	GABBRO [502]									PLU					WR [502]
[502]	OCEAN ISLAND	KERGUELEN / KERGUELEN ARCHIPELAGO	COURBET PENINSULA, MONTAGNES VERTES	-48.55	-49.75	68.5	70.58	SAE			s_77.18 [502]	MONZOGABBRO [502]									PLU					WR [502]
[502]	OCEAN ISLAND	KERGUELEN / KERGUELEN ARCHIPELAGO	COURBET PENINSULA, MONTAGNES VERTES	-48.55	-49.75	68.5	70.58	SAE			s_77.25 [502]	GABBRO [502]								CUMULATE [502]	PLU					WR [502]
[502]	OCEAN ISLAND	KERGUELEN / KERGUELEN ARCHIPELAGO	COURBET PENINSULA, MONTAGNES VERTES	-48.55	-49.75	68.5	70.58	SAE			s_77.38 [502]	MONZOGABBRO [502]									PLU					WR [502]
[502]	OCEAN ISLAND	KERGUELEN / KERGUELEN ARCHIPELAGO	COURBET PENINSULA, MONTAGNES VERTES	-48.55	-49.75	68.5	70.58	SAE			s_77.6 [502]	SYENITE [502]									PLU					WR [502]
[502]	OCEAN ISLAND	KERGUELEN / KERGUELEN ARCHIPELAGO	MONTS DES MAMELLES	-48.55	-49.75	68.5	70.58	SAE			s_77.112 [502]	GABBRO, CLINOPYROXENE-OLIVINE [502]									PLU					WR [502]
[502]	OCEAN ISLAND	KERGUELEN / KERGUELEN ARCHIPELAGO	MONTS DES MAMELLES	-48.55	-49.75	68.5	70.58	SAE			s_77.103C [502]	GABBRO, CLINOPYROXENE-OLIVINE [502]									PLU					WR [502]
[502]	OCEAN ISLAND	KERGUELEN / KERGUELEN ARCHIPELAGO	MONTS DES MAMELLES	-48.55	-49.75	68.5	70.58	SAE			s_77.116 [502]	SYENITE, QUARTZ [502]									PLU					WR [502]
[502]	OCEAN ISLAND	KERGUELEN / KERGUELEN ARCHIPELAGO	SOCIETE DE G…OGRAPHIE PENINSULA	-48.55	-49.75	68.5	70.58	SAE			s_81.85 [502]	GABBRO, BIOTITE [502]									PLU					WR [502]
[502]	OCEAN ISLAND	KERGUELEN / KERGUELEN ARCHIPELAGO	SOCIETE DE G…OGRAPHIE PENINSULA	-48.55	-49.75	68.5	70.58	SAE			s_81.86 [502]	GABBRO, BIOTITE [502]									PLU					WR [502]
[502]	OCEAN ISLAND	KERGUELEN / KERGUELEN ARCHIPELAGO	SOCIETE DE G…OGRAPHIE PENINSULA	-48.55	-49.75	68.5	70.58	SAE			s_82.260 [502]	MONZONITE [502]									PLU					WR [502]
[502]	OCEAN ISLAND	KERGUELEN / KERGUELEN ARCHIPELAGO	SOCIETE DE G…OGRAPHIE PENINSULA	-48.55	-49.75	68.5	70.58	SAE			s_81.84 [502]	MONZONITE [502]									PLU					WR [502]
[502]	OCEAN ISLAND	KERGUELEN / KERGUELEN ARCHIPELAGO	SOCIETE DE G…OGRAPHIE PENINSULA	-48.55	-49.75	68.5	70.58	SAE			s_81.83 [502]	MONZONITE [502]									PLU					WR [502]
[502]	OCEAN ISLAND	KERGUELEN / KERGUELEN ARCHIPELAGO	SOCIETE DE G…OGRAPHIE PENINSULA	-48.55	-49.75	68.5	70.58	SAE			s_82.215 [502]	MONZONITE [502]									PLU					WR [502]
[502]	OCEAN ISLAND	KERGUELEN / KERGUELEN ARCHIPELAGO	SOCIETE DE G…OGRAPHIE PENINSULA	-48.55	-49.75	68.5	70.58	SAE			s_CN7 [502]	SYENITE, NEPHELINE [502]									PLU					WR [502]
[502]	OCEAN ISLAND	KERGUELEN / KERGUELEN ARCHIPELAGO	SOCIETE DE G…OGRAPHIE PENINSULA	-48.55	-49.75	68.5	70.58	SAE			s_81.51 [502]	SYENITE, NEPHELINE [502]									PLU					WR [502]
[502]	OCEAN ISLAND	KERGUELEN / KERGUELEN ARCHIPELAGO	SOCIETE DE G…OGRAPHIE PENINSULA	-48.55	-49.75	68.5	70.58	SAE			s_CN9 [502]	SYENITE, NEPHELINE [502]									PLU					WR [502]
[502]	OCEAN ISLAND	KERGUELEN / KERGUELEN ARCHIPELAGO	SOCIETE DE G…OGRAPHIE PENINSULA	-48.55	-49.75	68.5	70.58	SAE			s_CN10 [502]	SYENITE, NEPHELINE [502]									PLU					WR [502]
[502]	OCEAN ISLAND	KERGUELEN / KERGUELEN ARCHIPELAGO	SOCIETE DE G…OGRAPHIE PENINSULA	-48.55	-49.75	68.5	70.58	SAE			s_CN42 [502]	SYENITE, NEPHELINE [502]									PLU					WR [502]
[502]	OCEAN ISLAND	KERGUELEN / KERGUELEN ARCHIPELAGO	SOCIETE DE G…OGRAPHIE PENINSULA	-48.55	-49.75	68.5	70.58	SAE			s_CN44 [502]	SYENITE, NEPHELINE [502]									PLU					WR [502]
[502]	OCEAN ISLAND	KERGUELEN / KERGUELEN ARCHIPELAGO	SOCIETE DE G…OGRAPHIE PENINSULA	-48.55	-49.75	68.5	70.58	SAE			s_81.50 [502]	SYENITE, NEPHELINE [502]									PLU					WR [502]
[502]	OCEAN ISLAND	KERGUELEN / KERGUELEN ARCHIPELAGO	SOCIETE DE G…OGRAPHIE PENINSULA	-48.55	-49.75	68.5	70.58	SAE			s_81.52 [502]	SYENITE, NEPHELINE [502]									PLU					WR [502]
[502]	OCEAN ISLAND	KERGUELEN / KERGUELEN ARCHIPELAGO	SOCIETE DE G…OGRAPHIE PENINSULA	-48.55	-49.75	68.5	70.58	SAE			s_81.53 [502]	SYENITE, NEPHELINE [502]									PLU					WR [502]
[502]	OCEAN ISLAND	KERGUELEN / KERGUELEN ARCHIPELAGO	SOCIETE DE G…OGRAPHIE PENINSULA	-48.55	-49.75	68.5	70.58	SAE			s_81.54 [502]	SYENITE, NEPHELINE [502]									PLU					WR [502]
[502]	OCEAN ISLAND	KERGUELEN / KERGUELEN ARCHIPELAGO	SOCIETE DE G…OGRAPHIE PENINSULA	-48.55	-49.75	68.5	70.58	SAE			s_81.55 [502]	SYENITE, NEPHELINE [502]									PLU					WR [502]
[502]	OCEAN ISLAND	KERGUELEN / KERGUELEN ARCHIPELAGO	SOCIETE DE G…OGRAPHIE PENINSULA	-48.55	-49.75	68.5	70.58	SAE			s_81.59 [502]	SYENITE [502]									PLU					WR [502]
[502]	OCEAN ISLAND	KERGUELEN / KERGUELEN ARCHIPELAGO	SOCIETE DE G…OGRAPHIE PENINSULA	-48.55	-49.75	68.5	70.58	SAE			s_82.269 [502]	SYENITE [502]									PLU					WR [502]
[502]	OCEAN ISLAND	KERGUELEN / KERGUELEN ARCHIPELAGO	SOCIETE DE G…OGRAPHIE PENINSULA	-48.55	-49.75	68.5	70.58	SAE			s_81.69 [502]	SYENITE [502]									PLU					WR [502]
[502]	OCEAN ISLAND	KERGUELEN / KERGUELEN ARCHIPELAGO	SOCIETE DE G…OGRAPHIE PENINSULA	-48.55	-49.75	68.5	70.58	SAE			s_81.93 [502]	SYENITE [502]									PLU					WR [502]
[502]	OCEAN ISLAND	KERGUELEN / KERGUELEN ARCHIPELAGO	SOCIETE DE G…OGRAPHIE PENINSULA	-48.55	-49.75	68.5	70.58	SAE			s_81.97 [502]	SYENITE [502]									PLU					WR [502]
[502]	OCEAN ISLAND	KERGUELEN / KERGUELEN ARCHIPELAGO	SOCIETE DE G…OGRAPHIE PENINSULA	-48.55	-49.75	68.5	70.58	SAE			s_82.249 [502]	SYENITE [502]									PLU					WR [502]
[502]	OCEAN ISLAND	KERGUELEN / KERGUELEN ARCHIPELAGO	SOCIETE DE G…OGRAPHIE PENINSULA, DIKE	-48.55	-49.75	68.5	70.58	SAE			s_81.62 [502]	GABBRO [502]									PLU					WR [502]
[1002]	OCEAN ISLAND	KERGUELEN / KERGUELEN ARCHIPELAGO / MOUNT TIZZARD	JEANNE D^ARC PENINSULA	-48.55	-49.75	68.5	70.58	SAE			s_MG-91-116 [1002]	GABBRO [1002]								HETEROGRANULAR GRANOBLASTIC-MOSAIC [1002]	PLU					WR [1002]
[1002]	OCEAN ISLAND	KERGUELEN / KERGUELEN ARCHIPELAGO / MOUNT TIZZARD	JEANNE D^ARC PENINSULA	-48.55	-49.75	68.5	70.58	SAE			s_ARC835 [1002]	GABBRO, SAPPHIRINE [1002]								HETEROGRANULAR GRANOBLASTIC-MOSAIC [1002]	PLU					WR [1002]
[1002]	OCEAN ISLAND	KERGUELEN / KERGUELEN ARCHIPELAGO / MOUNT TIZZARD	JEANNE D^ARC PENINSULA	-48.55	-49.75	68.5	70.58	SAE			s_MG-91-106 [1002]	GABBRO, ILMENITE [1002]								HETEROGRANULAR GRANOBLASTIC [1002]	PLU					WR [1002]
[1002]	OCEAN ISLAND	KERGUELEN / KERGUELEN ARCHIPELAGO / MOUNT TIZZARD	JEANNE D^ARC PENINSULA	-48.55	-49.75	68.5	70.58	SAE			s_GM-92-419 [1002]	GABBRO, ILMENITE [1002]								HETEROGRANULAR GRANOBLASTIC-MOSAIC [1002]	PLU					WR [1002]
[979]	OCEAN ISLAND	KERGUELEN / KERGUELEN ARCHIPELAGO		-48.55	-49.75	68.5	70.58	SAE			s_ARC343 [979]	GABBRO, PYROXENE [979]									PLU					WR [979]	47.15	0.29		21.51				3.63	14.99	6.68	0.07		0.56	2.17	0.02
[979]	OCEAN ISLAND	KERGUELEN / KERGUELEN ARCHIPELAGO		-48.55	-49.75	68.5	70.58	SAE			s_DR6.5 [979]	GABBRO, PYROXENE [979]									PLU					WR [979]	46.02	0.13		21.75				4.26	13.43	11.1	0.09		0.11	2.17	0.01
[979]	OCEAN ISLAND	KERGUELEN / KERGUELEN ARCHIPELAGO		-48.55	-49.75	68.5	70.58	SAE			s_MG99A [979]	GABBRO, SAPPHIRINE [979]									PLU					WR [979]	47.38	0.04		30.74				1.21	17.12	3.41	0.03		0.04	1.19	0.01
[979]	OCEAN ISLAND	KERGUELEN / KERGUELEN ARCHIPELAGO		-48.55	-49.75	68.5	70.58	SAE			s_MG107PL [979]	GABBRO, SAPPHIRINE [979]									PLU					WR [979]	47.22	0.11		24.74				2.18	16.61	8.61	0.06			0.95	0.02
[979]	OCEAN ISLAND	KERGUELEN / KERGUELEN ARCHIPELAGO		-48.55	-49.75	68.5	70.58	SAE			s_MG107PX [979]	GABBRO, SAPPHIRINE [979]									PLU					WR [979]	48.92	0.2		10.19				4.63	15.3	19.21	0.11		0.04	0.39	0.01
[979]	OCEAN ISLAND	KERGUELEN / KERGUELEN ARCHIPELAGO		-48.55	-49.75	68.5	70.58	SAE			s_MG116 [979]	GABBRO, SAPPHIRINE-GARNET [979]									PLU					WR [979]	44.54	0.03		27.59				2.49	13.91	10.24	0.05			1.08	0.02
[979]	OCEAN ISLAND	KERGUELEN / KERGUELEN ARCHIPELAGO		-48.55	-49.75	68.5	70.58	SAE			s_GM414 [979]	GABBRO, SAPPHIRINE-GARNET [979]									PLU					WR [979]	42.35	0.04		23.25				2.87	12.22	16.31	0.05		0.03	0.5	0.03
[979]	OCEAN ISLAND	KERGUELEN / KERGUELEN ARCHIPELAGO		-48.55	-49.75	68.5	70.58	SAE			s_MG121 [979]	GABBRO, GARNET [979]									PLU					WR [979]	45.2	0.11		14.12				5.8	13.34	17.55	0.11		0.06	0.6
[979]	OCEAN ISLAND	KERGUELEN / KERGUELEN ARCHIPELAGO		-48.55	-49.75	68.5	70.58	SAE			s_GM418 [979]	GABBRO, GARNET [979]									PLU					WR [979]	45.4	0.18		17.52				8.66	10.87	15.91	0.13		0.09	0.96	0.01
[979]	OCEAN ISLAND	KERGUELEN / KERGUELEN ARCHIPELAGO		-48.55	-49.75	68.5	70.58	SAE			s_MG134 [979]	GABBRO, ILMENITE-SPINEL [979]									PLU					WR [979]	38.59	5.96		15.44				13.41	12.43	9.93	0.16		0.14	1.37	0.02
[979]	OCEAN ISLAND	KERGUELEN / KERGUELEN ARCHIPELAGO		-48.55	-49.75	68.5	70.58	SAE			s_GM139 [979]	GABBRO, ILMENITE-SPINEL [979]									PLU					WR [979]	39.98	7.43		14.52				13.39	10.27	8.51	0.15		0.35	1.88	0.03
[979]	OCEAN ISLAND	KERGUELEN / KERGUELEN ARCHIPELAGO		-48.55	-49.75	68.5	70.58	SAE			s_MG103 [979]	GABBRO, ILMENITE [979]									PLU					WR [979]	44.82	2.08		12.89				13.02	13.19	8.2	0.24		0.11	1.75	0.05
[979]	OCEAN ISLAND	KERGUELEN / KERGUELEN ARCHIPELAGO		-48.55	-49.75	68.5	70.58	SAE			s_MG108 [979]	GABBRO, ILMENITE [979]									PLU					WR [979]	45.19	2.75		13.42				13.79	12.46	7.88	0.19		0.16	1.94	0.04
[979]	OCEAN ISLAND	KERGUELEN / KERGUELEN ARCHIPELAGO		-48.55	-49.75	68.5	70.58	SAE			s_GM419 [979]	GABBRO, ILMENITE [979]									PLU					WR [979]	45.85	1.53		14.94				11.3	12.52	8.01	0.19		0.17	1.94	0.06
[990]	OCEAN ISLAND	KERGUELEN / KERGUELEN ARCHIPELAGO	RALLIER DU BATY PENINSULA, RING COMPLEXES	-48.55	-49.75	68.5	70.58	SAE			s_2657 [990]	GABBRO [990]									PLU					WR [990]
[990]	OCEAN ISLAND	KERGUELEN / KERGUELEN ARCHIPELAGO	RALLIER DU BATY PENINSULA, RING COMPLEXES	-48.55	-49.75	68.5	70.58	SAE			s_2660 [990]	GABBRO [990]									PLU					WR [990]
[990]	OCEAN ISLAND	KERGUELEN / KERGUELEN ARCHIPELAGO	RALLIER DU BATY PENINSULA, RING COMPLEXES	-48.55	-49.75	68.5	70.58	SAE			s_2661 [990]	GABBRO [990]									PLU					WR [990]
[990]	OCEAN ISLAND	KERGUELEN / KERGUELEN ARCHIPELAGO	RALLIER DU BATY PENINSULA, RING COMPLEXES	-48.55	-49.75	68.5	70.58	SAE			s_2659 [990]	GABBRO [990]									PLU					WR [990]
[990]	OCEAN ISLAND	KERGUELEN / KERGUELEN ARCHIPELAGO	RALLIER DU BATY PENINSULA, RING COMPLEXES	-48.55	-49.75	68.5	70.58	SAE			s_2654 [990]	GABBRO [990]									PLU					WR [990]
[990]	OCEAN ISLAND	KERGUELEN / KERGUELEN ARCHIPELAGO	RALLIER DU BATY PENINSULA, RING COMPLEXES	-48.55	-49.75	68.5	70.58	SAE			s_2655 [990]	GABBRO [990]									PLU					WR [990]
[990]	OCEAN ISLAND	KERGUELEN / KERGUELEN ARCHIPELAGO	RALLIER DU BATY PENINSULA, RING COMPLEXES	-48.55	-49.75	68.5	70.58	SAE			s_2599 [990]	GABBRO [990]	9700000 [990]	9700000 [990]							PLU					WR [990]
[990]	OCEAN ISLAND	KERGUELEN / KERGUELEN ARCHIPELAGO	RALLIER DU BATY PENINSULA, RING COMPLEXES	-48.55	-49.75	68.5	70.58	SAE			s_2656 [990]	GABBRO [990]									PLU					WR [990]
[990]	OCEAN ISLAND	KERGUELEN / KERGUELEN ARCHIPELAGO	RALLIER DU BATY PENINSULA, RING COMPLEXES	-48.55	-49.75	68.5	70.58	SAE			s_2658 [990]	GABBRO [990]									PLU					WR [990]
[990]	OCEAN ISLAND	KERGUELEN / KERGUELEN ARCHIPELAGO	RALLIER DU BATY PENINSULA, RING COMPLEXES	-48.55	-49.75	68.5	70.58	SAE			s_2678 [990]	GABBRO [990]									PLU					WR [990]
[990]	OCEAN ISLAND	KERGUELEN / KERGUELEN ARCHIPELAGO	RALLIER DU BATY PENINSULA, RING COMPLEXES	-48.55	-49.75	68.5	70.58	SAE			s_2680 [990]	GABBRO [990]									PLU					WR [990]
[990]	OCEAN ISLAND	KERGUELEN / KERGUELEN ARCHIPELAGO	RALLIER DU BATY PENINSULA, RING COMPLEXES	-48.55	-49.75	68.5	70.58	SAE			s_2683 [990]	GABBRO [990]									PLU					WR [990]
[990]	OCEAN ISLAND	KERGUELEN / KERGUELEN ARCHIPELAGO	RALLIER DU BATY PENINSULA, RING COMPLEXES	-48.55	-49.75	68.5	70.58	SAE			s_2679 [990]	GABBRO [990]									PLU					WR [990]
[990]	OCEAN ISLAND	KERGUELEN / KERGUELEN ARCHIPELAGO	RALLIER DU BATY PENINSULA, RING COMPLEXES	-48.55	-49.75	68.5	70.58	SAE			s_2684 [990]	GABBRO [990]									PLU					WR [990]
[990]	OCEAN ISLAND	KERGUELEN / KERGUELEN ARCHIPELAGO	RALLIER DU BATY PENINSULA, RING COMPLEXES	-48.55	-49.75	68.5	70.58	SAE			s_2602 [990]	GABBRO [990]									PLU					WR [990]
[990]	OCEAN ISLAND	KERGUELEN / KERGUELEN ARCHIPELAGO	RALLIER DU BATY PENINSULA, RING COMPLEXES	-48.55	-49.75	68.5	70.58	SAE			s_2603 [990]	GABBRO [990]	7900000 [990]	7900000 [990]							PLU					WR [990]
[990]	OCEAN ISLAND	KERGUELEN / KERGUELEN ARCHIPELAGO	RALLIER DU BATY PENINSULA, RING COMPLEXES	-48.55	-49.75	68.5	70.58	SAE			s_2664 [990]	GABBRO [990]									PLU					WR [990]
[990]	OCEAN ISLAND	KERGUELEN / KERGUELEN ARCHIPELAGO	RALLIER DU BATY PENINSULA, RING COMPLEXES	-48.55	-49.75	68.5	70.58	SAE			s_2662 [990]	GABBRO [990]									PLU					WR [990]
[990]	OCEAN ISLAND	KERGUELEN / KERGUELEN ARCHIPELAGO	RALLIER DU BATY PENINSULA, RING COMPLEXES	-48.55	-49.75	68.5	70.58	SAE			s_2604 [990]	GABBRO [990]									PLU					WR [990]
[990]	OCEAN ISLAND	KERGUELEN / KERGUELEN ARCHIPELAGO	RALLIER DU BATY PENINSULA, RING COMPLEXES	-48.55	-49.75	68.5	70.58	SAE			s_2663 [990]	GABBRO [990]									PLU					WR [990]
[990]	OCEAN ISLAND	KERGUELEN / KERGUELEN ARCHIPELAGO	RALLIER DU BATY PENINSULA, RING COMPLEXES	-48.55	-49.75	68.5	70.58	SAE			s_2605 [990]	GABBRO [990]									PLU					WR [990]
[990]	OCEAN ISLAND	KERGUELEN / KERGUELEN ARCHIPELAGO	RALLIER DU BATY PENINSULA, RING COMPLEXES	-48.55	-49.75	68.5	70.58	SAE			s_2606 [990]	GABBRO [990]									PLU					WR [990]
[990]	OCEAN ISLAND	KERGUELEN / KERGUELEN ARCHIPELAGO	RALLIER DU BATY PENINSULA, RING COMPLEXES	-48.55	-49.75	68.5	70.58	SAE			s_2659 [990]	GABBRO [990]									PLU					WR [990]
[990]	OCEAN ISLAND	KERGUELEN / KERGUELEN ARCHIPELAGO	RALLIER DU BATY PENINSULA, RING COMPLEXES	-48.55	-49.75	68.5	70.58	SAE			s_2599 [990]	GABBRO [990]	9700000 [990]	9700000 [990]							PLU					WR [990]
[990]	OCEAN ISLAND	KERGUELEN / KERGUELEN ARCHIPELAGO	RALLIER DU BATY PENINSULA, RING COMPLEXES	-48.55	-49.75	68.5	70.58	SAE			s_2656 [990]	GABBRO [990]									PLU					WR [990]
[990]	OCEAN ISLAND	KERGUELEN / KERGUELEN ARCHIPELAGO	RALLIER DU BATY PENINSULA, RING COMPLEXES	-48.55	-49.75	68.5	70.58	SAE			s_2662 [990]	GABBRO [990]									PLU					WR [990]
[990]	OCEAN ISLAND	KERGUELEN / KERGUELEN ARCHIPELAGO	RALLIER DU BATY PENINSULA, RING COMPLEXES	-48.55	-49.75	68.5	70.58	SAE			s_2604 [990]	GABBRO [990]									PLU					WR [990]
[990]	OCEAN ISLAND	KERGUELEN / KERGUELEN ARCHIPELAGO	RALLIER DU BATY PENINSULA, RING COMPLEXES	-48.55	-49.75	68.5	70.58	SAE			s_2663 [990]	GABBRO [990]									PLU					WR [990]
[990]	OCEAN ISLAND	KERGUELEN / KERGUELEN ARCHIPELAGO	RALLIER DU BATY PENINSULA, RING COMPLEXES	-48.55	-49.75	68.5	70.58	SAE			s_2663 [990]	GABBRO [990]									PLU					WR [990]
[990]	OCEAN ISLAND	KERGUELEN / KERGUELEN ARCHIPELAGO	RALLIER DU BATY PENINSULA, RING COMPLEXES	-48.55	-49.75	68.5	70.58	SAE			s_2606 [990]	GABBRO [990]									PLU					WR [990]
[990]	OCEAN ISLAND	KERGUELEN / KERGUELEN ARCHIPELAGO	RALLIER DU BATY PENINSULA	-48.55	-49.75	68.5	70.58	SAE			s_2614 [990]	GABBRO [990]	14000000 [990]	14000000 [990]							PLU					WR [990]
[990]	OCEAN ISLAND	KERGUELEN / KERGUELEN ARCHIPELAGO		-48.55	-49.75	68.5	70.58	SAE			s_2622 [990]	GABBRO [990]	14000000 [990]	14000000 [990]							PLU					WR [990]
[990]	OCEAN ISLAND	KERGUELEN / KERGUELEN ARCHIPELAGO		-48.55	-49.75	68.5	70.58	SAE			s_2624 [990]	GABBRO [990]	14000000 [990]	14000000 [990]							PLU					WR [990]
[990]	OCEAN ISLAND	KERGUELEN / KERGUELEN ARCHIPELAGO	COURBET PENINSULA	-48.55	-49.75	68.5	70.58	SAE			s_3307 [990]	MONZONITE [990]	20000000 [990]	20000000 [990]							PLU					WR [990]
[990]	OCEAN ISLAND	KERGUELEN / KERGUELEN ARCHIPELAGO	RALLIER DU BATY PENINSULA	-48.55	-49.75	68.5	70.58	SAE			s_2598 [990]	SYENITE [990]									PLU					WR [990]
[990]	OCEAN ISLAND	KERGUELEN / KERGUELEN ARCHIPELAGO	RALLIER DU BATY PENINSULA, RING COMPLEXES	-48.55	-49.75	68.5	70.58	SAE			s_2599 [990]	GABBRO [990]	9700000 [990]	9700000 [990]							PLU					WR [990]
[990]	OCEAN ISLAND	KERGUELEN / KERGUELEN ARCHIPELAGO	RALLIER DU BATY PENINSULA, RING COMPLEXES	-48.55	-49.75	68.5	70.58	SAE			s_2603 [990]	GABBRO [990]	7900000 [990]	7900000 [990]							PLU					WR [990]
[990]	OCEAN ISLAND	KERGUELEN / KERGUELEN ARCHIPELAGO	RALLIER DU BATY PENINSULA	-48.55	-49.75	68.5	70.58	SAE			s_2607 [990]	GRANITE [990]									PLU					WR [990]
[990]	OCEAN ISLAND	KERGUELEN / KERGUELEN ARCHIPELAGO	RALLIER DU BATY PENINSULA	-48.55	-49.75	68.5	70.58	SAE			s_2616 [990]	SYENITE [990]									PLU					WR [990]
[990]	OCEAN ISLAND	KERGUELEN / KERGUELEN ARCHIPELAGO	RALLIER DU BATY PENINSULA, RING COMPLEXES	-48.55	-49.75	68.5	70.58	SAE			s_2678 [990]	GABBRO [990]									PLU					WR [990]
[990]	OCEAN ISLAND	KERGUELEN / KERGUELEN ARCHIPELAGO	RALLIER DU BATY PENINSULA, RING COMPLEXES	-48.55	-49.75	68.5	70.58	SAE			s_2679 [990]	GABBRO [990]									PLU					WR [990]
[990]	OCEAN ISLAND	KERGUELEN / KERGUELEN ARCHIPELAGO	RALLIER DU BATY PENINSULA, RING COMPLEXES	-48.55	-49.75	68.5	70.58	SAE			s_2680 [990]	GABBRO [990]									PLU					WR [990]
[990]	OCEAN ISLAND	KERGUELEN / KERGUELEN ARCHIPELAGO	RALLIER DU BATY PENINSULA, RING COMPLEXES	-48.55	-49.75	68.5	70.58	SAE			s_2683 [990]	GABBRO [990]									PLU					WR [990]
[990]	OCEAN ISLAND	KERGUELEN / KERGUELEN ARCHIPELAGO	RALLIER DU BATY PENINSULA	-48.55	-49.75	68.5	70.58	SAE			s_MD71 [990]	GRANITE [990]									PLU					WR [990]
[990]	OCEAN ISLAND	KERGUELEN / KERGUELEN ARCHIPELAGO	RALLIER DU BATY PENINSULA, RING COMPLEXES	-48.55	-49.75	68.5	70.58	SAE			s_2599 [990]	GABBRO [990]	9700000 [990]	9700000 [990]							PLU					WR [990]
[990]	OCEAN ISLAND	KERGUELEN / KERGUELEN ARCHIPELAGO	RALLIER DU BATY PENINSULA, RING COMPLEXES	-48.55	-49.75	68.5	70.58	SAE			s_2603 [990]	GABBRO [990]	7900000 [990]	7900000 [990]							PLU					WR [990]
[988][549]	OCEAN ISLAND	KERGUELEN / KERGUELEN ARCHIPELAGO	MONTS BALLONS	-48.55	-49.75	68.5	70.58	SAE			s_7851 [988] / s_78-51 [549]	GABBRO [988]	13800000 [988]	13800000 [988]							PLU					WR [988]	43.47	3.27		14.82		9.24	3.69	12.56	9.46	6.15	0.21		2.9	3.17	1.05
[988][549]	OCEAN ISLAND	KERGUELEN / KERGUELEN ARCHIPELAGO	MONTS BALLONS	-48.55	-49.75	68.5	70.58	SAE			s_7860 [988] / s_78-60 [549]	GABBRO [988] / MONZOGABBRO [549]	13800000 [988]	13800000 [988]							PLU					WR [988]	45.33	3.02		15.52		7.51	3.43	10.6	8.74	5.91	0.14		2.66	3.5	0.76
[988][549]	OCEAN ISLAND	KERGUELEN / KERGUELEN ARCHIPELAGO	MONTS BALLONS	-48.55	-49.75	68.5	70.58	SAE			s_7852 [988] / s_78-52 [549]	MONZOGABBRO [988]	17000000 [988]	17000000 [988]							PLU					WR [988]	47.72	2.66		18.62		6.28	2.34	8.39	7.61	3.12	0.17		3.55	5.03	0.98
[988][549]	OCEAN ISLAND	KERGUELEN / KERGUELEN ARCHIPELAGO	MONTS BALLONS	-48.55	-49.75	68.5	70.58	SAE			s_7831C [988] / s_78-31C [549]	MONZOGABBRO [988] / MONZONITE [549]	17000000 [988]	17000000 [988]							PLU					WR [988]	46.79	2.35		16.86		5.53	3.76	8.92	6.75	3.36	0.17		3.86	4.57	0.72
[986]	OCEAN ISLAND	KERGUELEN / KERGUELEN ARCHIPELAGO		-48.55	-49.75	68.5	70.58	SAE			s_15N3 [986]	GRANITE [986]									PLU					WR [986]
[986]	OCEAN ISLAND	KERGUELEN / KERGUELEN ARCHIPELAGO		-48.55	-49.75	68.5	70.58	SAE			s_15N20 [986]	GRANITE [986]									PLU					WR [986]
[986]	OCEAN ISLAND	KERGUELEN / KERGUELEN ARCHIPELAGO		-48.55	-49.75	68.5	70.58	SAE			s_15M1 [986]	GRANITE [986]									PLU					WR [986]
[986]	OCEAN ISLAND	KERGUELEN / KERGUELEN ARCHIPELAGO		-48.55	-49.75	68.5	70.58	SAE			s_15N4 [986]	GRANITE [986]									PLU					WR [986]
[986]	OCEAN ISLAND	KERGUELEN / KERGUELEN ARCHIPELAGO		-48.55	-49.75	68.5	70.58	SAE			s_15N5 [986]	GRANITE [986]									PLU					WR [986]
[986]	OCEAN ISLAND	KERGUELEN / KERGUELEN ARCHIPELAGO		-48.55	-49.75	68.5	70.58	SAE			s_15N22 [986]	GRANITE [986]									PLU					WR [986]
[986]	OCEAN ISLAND	KERGUELEN / KERGUELEN ARCHIPELAGO		-48.55	-49.75	68.5	70.58	SAE			s_15A1 [986]	NOT GIVEN [986]									PLU					WR [986]
[986]	OCEAN ISLAND	KERGUELEN / KERGUELEN ARCHIPELAGO		-48.55	-49.75	68.5	70.58	SAE			s_15F2 [986]	NOT GIVEN [986]									PLU					WR [986]
[986]	OCEAN ISLAND	KERGUELEN / KERGUELEN ARCHIPELAGO		-48.55	-49.75	68.5	70.58	SAE			s_15F1 [986]	NOT GIVEN [986]									PLU					WR [986]
[986]	OCEAN ISLAND	KERGUELEN / KERGUELEN ARCHIPELAGO		-48.55	-49.75	68.5	70.58	SAE			s_15L8 [986]	NOT GIVEN [986]									PLU					WR [986]
[986]	OCEAN ISLAND	KERGUELEN / KERGUELEN ARCHIPELAGO		-48.55	-49.75	68.5	70.58	SAE			s_15E5 [986]	NOT GIVEN [986]									PLU					WR [986]
[986]	OCEAN ISLAND	KERGUELEN / KERGUELEN ARCHIPELAGO		-48.55	-49.75	68.5	70.58	SAE			s_15H3 [986]	NOT GIVEN [986]									PLU					WR [986]
[986]	OCEAN ISLAND	KERGUELEN / KERGUELEN ARCHIPELAGO		-48.55	-49.75	68.5	70.58	SAE			s_15H10 [986]	NOT GIVEN [986]									PLU					WR [986]
[986]	OCEAN ISLAND	KERGUELEN / KERGUELEN ARCHIPELAGO		-48.55	-49.75	68.5	70.58	SAE			s_15R15 [986]	NOT GIVEN [986]									PLU					WR [986]
[11073]	OCEAN ISLAND	KERGUELEN / KERGUELEN ARCHIPELAGO / VAL GABBRO PLUTONIC SUITE	SE JEANNE D^ARC PENINSULA	-49.7114	-49.7114	70.0801	70.0801	SAE			s_MPC99-32 [11073]	WEHRLITE [11073]									PLU					WR [11073]	43.77	1.33		6.17				12.65	6.15	26.79	0.19		0.42	0.82	0.17
[11073]	OCEAN ISLAND	KERGUELEN / KERGUELEN ARCHIPELAGO / VAL GABBRO PLUTONIC SUITE	SE JEANNE D^ARC PENINSULA	-49.7114	-49.7114	70.0801	70.0801	SAE			s_MPC99-34 [11073]	WEHRLITE [11073]									PLU					WR [11073]	44.93	0.84		6.55				12.08	9.59	23.27	0.19		0.37	0.74	0.07
[11073]	OCEAN ISLAND	KERGUELEN / KERGUELEN ARCHIPELAGO / VAL GABBRO PLUTONIC SUITE	SE JEANNE D^ARC PENINSULA	-49.7114	-49.7114	70.0801	70.0801	SAE			s_MPC99-38 [11073]	WEHRLITE [11073]									PLU					WR [11073]	43.34	0.71		5.62				13.08	6.72	27.76	0.2		0.23	0.55	0.08
[11073]	OCEAN ISLAND	KERGUELEN / KERGUELEN ARCHIPELAGO / VAL GABBRO PLUTONIC SUITE	SE JEANNE D^ARC PENINSULA	-49.7114	-49.7114	70.0801	70.0801	SAE			s_MPC99-39 [11073]	WEHRLITE [11073]									PLU					WR [11073]	44.15	0.93		5.25				13.78	8.88	24.41	0.21		0.14	0.54	0.08
[11073]	OCEAN ISLAND	KERGUELEN / KERGUELEN ARCHIPELAGO / VAL GABBRO PLUTONIC SUITE	SE JEANNE D^ARC PENINSULA	-49.7114	-49.7114	70.0801	70.0801	SAE			s_MPC99-36 [11073]	CLINOPYROXENITE, OLIVINE [11073]									PLU					WR [11073]	46.86	1.5		7.86				11.53	12.32	16.71	0.19		0.48	0.71	0.13
[11073]	OCEAN ISLAND	KERGUELEN / KERGUELEN ARCHIPELAGO / VAL GABBRO PLUTONIC SUITE	SE JEANNE D^ARC PENINSULA	-49.7248	-49.7248	70.0807	70.0807	SAE			s_MPC99-40 [11073]	CLINOPYROXENITE, OLIVINE [11073]									PLU					WR [11073]	45.4	0.73		8.14				11.16	12.87	19.23	0.18		0.12	0.69	0.03
[11073]	OCEAN ISLAND	KERGUELEN / KERGUELEN ARCHIPELAGO / VAL GABBRO PLUTONIC SUITE	SE JEANNE D^ARC PENINSULA	-49.7248	-49.7248	70.0807	70.0807	SAE			s_MPC99-41 [11073]	CLINOPYROXENITE, OLIVINE [11073]									PLU					WR [11073]	47.31	1.09		11.46				9.18	15.19	13.35	0.16		0.15	0.7	0.08
[11073]	OCEAN ISLAND	KERGUELEN / KERGUELEN ARCHIPELAGO / VAL GABBRO PLUTONIC SUITE	SE JEANNE D^ARC PENINSULA	-49.7114	-49.7114	70.0801	70.0801	SAE			s_MPC99-30 [11073]	GABBRO [11073]				OLIGOCENE [11073]				EQUIGRANULAR [11073]	PLU					WR [11073]	48.52	1.56		16.22				7.85	14.11	8.3	0.14		0.6	1.7	0.14
[11073]	OCEAN ISLAND	KERGUELEN / KERGUELEN ARCHIPELAGO / VAL GABBRO PLUTONIC SUITE	SE JEANNE D^ARC PENINSULA	-49.7114	-49.7114	70.0801	70.0801	SAE			s_MPC99-31 [11073]	GABBRO [11073]				OLIGOCENE [11073]				EQUIGRANULAR [11073]	PLU					WR [11073]	49.12	1.71		15.32				8.31	12.9	8.28	0.14		0.98	1.96	0.18
[11073]	OCEAN ISLAND	KERGUELEN / KERGUELEN ARCHIPELAGO / VAL GABBRO PLUTONIC SUITE	SE JEANNE D^ARC PENINSULA	-49.7263	-49.7263	70.0819	70.0819	SAE			s_MPC99-44 [11073]	GABBRO [11073]				OLIGOCENE [11073]				EQUIGRANULAR [11073]	PLU					WR [11073]	48.74	1.38		19.01				6.4	14.62	6.4	0.11		0.54	2.08	0.15
[11073]	OCEAN ISLAND	KERGUELEN / KERGUELEN ARCHIPELAGO / VAL GABBRO PLUTONIC SUITE	SE JEANNE D^ARC PENINSULA	-49.7263	-49.7263	70.0819	70.0819	SAE			s_MPC99-45 [11073]	GABBRO [11073]				OLIGOCENE [11073]				EQUIGRANULAR [11073]	PLU					WR [11073]	49.48	2.73		21.21				7.12	10.55	3.08	0.1		1.32	3.05	0.31
[11073]	OCEAN ISLAND	KERGUELEN / KERGUELEN ARCHIPELAGO / VAL GABBRO PLUTONIC SUITE	SE JEANNE D^ARC PENINSULA	-49.7291	-49.7291	70.0752	70.0752	SAE			s_MPC99-46 [11073]	GABBRO [11073]				OLIGOCENE [11073]				EQUIGRANULAR [11073]	PLU					WR [11073]	45.54	1.53		13.66				11.18	11.66	13.06	0.17		0.59	1.1	0.14
[11073]	OCEAN ISLAND	KERGUELEN / KERGUELEN ARCHIPELAGO / VAL GABBRO PLUTONIC SUITE	SE JEANNE D^ARC PENINSULA	-49.7164	-49.7164	70.0777	70.0777	SAE			s_MPC99-58 [11073]	GABBRO [11073]				OLIGOCENE [11073]				EQUIGRANULAR [11073]	PLU					WR [11073]	49.07	1.72		17.77				7.77	13.25	6.58	0.12		0.74	2.11	0.16
[11073]	OCEAN ISLAND	KERGUELEN / KERGUELEN ARCHIPELAGO / VAL GABBRO PLUTONIC SUITE	SE JEANNE D^ARC PENINSULA	-49.7164	-49.7164	70.0777	70.0777	SAE			s_MPC99-59 [11073]	GABBRO [11073]				OLIGOCENE [11073]				EQUIGRANULAR [11073]	PLU					WR [11073]	45.44	5.05		14.07				13.52	10.67	5.26	0.21		0.91	2.73	0.33
[11073]	OCEAN ISLAND	KERGUELEN / KERGUELEN ARCHIPELAGO / VAL GABBRO PLUTONIC SUITE	SE JEANNE D^ARC PENINSULA	-49.7164	-49.7164	70.0777	70.0777	SAE			s_MPC99-60 [11073]	GABBRO [11073]				OLIGOCENE [11073]				EQUIGRANULAR [11073]	PLU					WR [11073]	48.61	2.86		16.93				9.97	11.15	5.07	0.16		1.15	2.77	0.3
[11073]	OCEAN ISLAND	KERGUELEN / KERGUELEN ARCHIPELAGO / VAL GABBRO PLUTONIC SUITE	SE JEANNE D^ARC PENINSULA	-49.7102	-49.7102	70.0792	70.0792	SAE			s_MPC99-23 [11073]	GABBRO [11073]				OLIGOCENE [11073]					PLU					WR [11073]	48.47	3.2		14.31				11.94	10.37	5.64	0.18		1.43	2.85	0.46
[11073]	OCEAN ISLAND	KERGUELEN / KERGUELEN ARCHIPELAGO / VAL GABBRO PLUTONIC SUITE	SE JEANNE D^ARC PENINSULA	-49.7102	-49.7102	70.0792	70.0792	SAE			s_MPC99-28 [11073]	GABBRO [11073]				OLIGOCENE [11073]					PLU					WR [11073]	48.83	2.9		14.49				11.06	10.85	6.02	0.17		1.31	2.76	0.42
[11073]	OCEAN ISLAND	KERGUELEN / KERGUELEN ARCHIPELAGO / VAL GABBRO PLUTONIC SUITE	SE JEANNE D^ARC PENINSULA	-49.7207	-49.7207	70.0752	70.0752	SAE			s_MPC99-51 [11073]	GABBRO [11073]				OLIGOCENE [11073]					PLU					WR [11073]	47.97	3.29		14.82				12.16	9.48	5.51	0.19		1.75	3.17	0.45
[11073]	OCEAN ISLAND	KERGUELEN / KERGUELEN ARCHIPELAGO / VAL GABBRO PLUTONIC SUITE	SE JEANNE D^ARC PENINSULA	-49.7207	-49.7207	70.0752	70.0752	SAE			s_MPC99-52 [11073]	GABBRO [11073]				OLIGOCENE [11073]					PLU					WR [11073]	46.8	2.47		12.03				11.01	11.07	11.6	0.18		1.04	2.15	0.27
[11073]	OCEAN ISLAND	KERGUELEN / KERGUELEN ARCHIPELAGO / VAL GABBRO PLUTONIC SUITE	SE JEANNE D^ARC PENINSULA	-49.719	-49.719	70.0748	70.0748	SAE			s_MPC99-54 [11073]	GABBRO [11073]				OLIGOCENE [11073]					PLU					WR [11073]	48.69	2.5		16.65				9.91	10.94	5.91	0.16		1.09	2.68	0.3
[11073]	OCEAN ISLAND	KERGUELEN / KERGUELEN ARCHIPELAGO / VAL GABBRO PLUTONIC SUITE	SE JEANNE D^ARC PENINSULA	-49.7102	-49.7102	70.0792	70.0792	SAE			s_MPC99-24 [11073]	GABBRO [11073]				OLIGOCENE [11073]				SUBOPHITIC [11073]	PLU					WR [11073]	49.1	3.23		14.24				11.9	9.29	5	0.18		1.88	3.31	0.54
[11073]	OCEAN ISLAND	KERGUELEN / KERGUELEN ARCHIPELAGO / VAL GABBRO PLUTONIC SUITE	SE JEANNE D^ARC PENINSULA	-49.7102	-49.7102	70.0792	70.0792	SAE			s_MPC99-25 [11073]	GABBRO [11073]				OLIGOCENE [11073]				SUBOPHITIC [11073]	PLU					WR [11073]	48.86	3.36		14.13				12.04	9.35	4.94	0.18		1.79	3.12	0.54
[11073]	OCEAN ISLAND	KERGUELEN / KERGUELEN ARCHIPELAGO / VAL GABBRO PLUTONIC SUITE	SE JEANNE D^ARC PENINSULA	-49.7102	-49.7102	70.0792	70.0792	SAE			s_MPC99-26 [11073]	GABBRO [11073]				OLIGOCENE [11073]				SUBOPHITIC [11073]	PLU					WR [11073]	49.04	3.32		14.25				12.01	9.36	4.89	0.19		1.86	3.16	0.56
[11073]	OCEAN ISLAND	KERGUELEN / KERGUELEN ARCHIPELAGO / VAL GABBRO PLUTONIC SUITE	SE JEANNE D^ARC PENINSULA	-49.7114	-49.7114	70.0801	70.0801	SAE			s_MPC99-34_NONLEACHED [11073]	WEHRLITE [11073]				OLIGOCENE [11073]					PLU					WR [11073]
[11073]	OCEAN ISLAND	KERGUELEN / KERGUELEN ARCHIPELAGO / VAL GABBRO PLUTONIC SUITE	SE JEANNE D^ARC PENINSULA	-49.7207	-49.7207	70.0752	70.0752	SAE			s_MPC99-51 [11073]	GABBRO [11073]				OLIGOCENE [11073]					PLU					WR [11073]
[11073]	OCEAN ISLAND	KERGUELEN / KERGUELEN ARCHIPELAGO / VAL GABBRO PLUTONIC SUITE	SE JEANNE D^ARC PENINSULA	-49.7102	-49.7102	70.0792	70.0792	SAE			s_MPC99-24 [11073]	GABBRO [11073]				OLIGOCENE [11073]				SUBOPHITIC [11073]	PLU					WR [11073]
[11073]	OCEAN ISLAND	KERGUELEN / KERGUELEN ARCHIPELAGO / VAL GABBRO PLUTONIC SUITE	SE JEANNE D^ARC PENINSULA	-49.7102	-49.7102	70.0792	70.0792	SAE			s_MPC99-24 [11073]	GABBRO [11073]				OLIGOCENE [11073]				SUBOPHITIC [11073]	PLU					WR [11073]
[11073]	OCEAN ISLAND	KERGUELEN / KERGUELEN ARCHIPELAGO / VAL GABBRO PLUTONIC SUITE	SE JEANNE D^ARC PENINSULA	-49.7102	-49.7102	70.0792	70.0792	SAE			s_MPC99-25 [11073]	GABBRO [11073]				OLIGOCENE [11073]				SUBOPHITIC [11073]	PLU					WR [11073]
[11073]	OCEAN ISLAND	KERGUELEN / KERGUELEN ARCHIPELAGO / VAL GABBRO PLUTONIC SUITE	SE JEANNE D^ARC PENINSULA	-49.7102	-49.7102	70.0792	70.0792	SAE			s_MPC99-25 [11073]	GABBRO [11073]				OLIGOCENE [11073]				SUBOPHITIC [11073]	PLU					WR [11073]
[988]	OCEAN ISLAND	KERGUELEN / KERGUELEN ARCHIPELAGO / VAL GABBRO PLUTONIC SUITE	SE JEANNE D^ARC PENINSULA	-48.55	-49.75	68.5	70.58	SAE			s_K91 [988]	GABBRO [988]	39000000 [988]	39000000 [988]							PLU					WR [988]	42.41	1.51		7.07		6.89	6.69		12.86	14.93	0.2		0.09	0.31	0.01		5.6	0.46
[988]	OCEAN ISLAND	KERGUELEN / KERGUELEN ARCHIPELAGO / VAL GABBRO PLUTONIC SUITE	SE JEANNE D^ARC PENINSULA	-48.55	-49.75	68.5	70.58	SAE			s_7802 [988]	GABBRO [988]	39000000 [988]	39000000 [988]							PLU					WR [988]	47.61	0.73		14.86		3.63	5.24		14.28	9.64	0.2		0.38	2.48	0.22	1.09
[988]	OCEAN ISLAND	KERGUELEN / KERGUELEN ARCHIPELAGO / VAL GABBRO PLUTONIC SUITE	SE JEANNE D^ARC PENINSULA	-48.55	-49.75	68.5	70.58	SAE			s_7812 [988]	GABBRO [988]	39000000 [988]	39000000 [988]							PLU					WR [988]	44.92	1.7		12.92		4.58	7.19		14.26	11.1	0.12		0.54	1.43	0.05		1.39	0.11
[988]	OCEAN ISLAND	KERGUELEN / KERGUELEN ARCHIPELAGO / VAL GABBRO PLUTONIC SUITE	SE JEANNE D^ARC PENINSULA	-48.55	-49.75	68.5	70.58	SAE			s_7808 [988]	MONZOGABBRO [988]	39000000 [988]	39000000 [988]							PLU					WR [988]	57.01	1.45		16.57		5.43	2.97		3.65	2.02	0.3		3.85	4.65	0.2		1.31	0.21
[988]	OCEAN ISLAND	KERGUELEN / KERGUELEN ARCHIPELAGO / VAL GABBRO PLUTONIC SUITE	SE JEANNE D^ARC PENINSULA	-48.55	-49.75	68.5	70.58	SAE			s_7806 [988]	SYENITE, QUARTZ [988]	39000000 [988]	39000000 [988]							PLU					WR [988]	57.64	1.33		17.27		5.43	2.15		3.14	1.23	0.02		4.16	4.57	0.2		0.93	0.18
[988]	OCEAN ISLAND	KERGUELEN / KERGUELEN ARCHIPELAGO / VAL GABBRO PLUTONIC SUITE	SE JEANNE D^ARC PENINSULA	-48.55	-49.75	68.5	70.58	SAE			s_7813 [988]	SYENITE, QUARTZ [988]	39000000 [988]	39000000 [988]							PLU					WR [988]	58.38	1.02		18.83		4.08	2.19		3.37	0.69	0.1		5.15	4.51	0.08		0.83	0.09
[988]	OCEAN ISLAND	KERGUELEN / KERGUELEN ARCHIPELAGO	COURBET PENINSULA, MONTS MAMMELLES	-48.55	-49.75	68.5	70.58	SAE			s_77134 [988]	GABBRO [988]									PLU					WR [988]	38.31	4.23		14.2		9.44	8.72		13.88	7.78			0.45	1.5	0.27		1.19	0.06
[988]	OCEAN ISLAND	KERGUELEN / KERGUELEN ARCHIPELAGO	COURBET PENINSULA, MONTS MAMMELLES	-48.55	-49.75	68.5	70.58	SAE			s_77102C [988]	GABBRO [988]									PLU					WR [988]	43.48	3.28		17.99		6.01	7.61		10.31	6.33	0.1		0.63	2.63	0.26		1.18	0.15
[988]	OCEAN ISLAND	KERGUELEN / KERGUELEN ARCHIPELAGO	COURBET PENINSULA, MONTS MAMMELLES	-48.55	-49.75	68.5	70.58	SAE			s_77103A [988]	GABBRO [988]									PLU					WR [988]	45.19	1.55		19.54		5.71	6.59		12.19	5.04	0.11		0.72	2.02	0.08		1.07	0.13
[988]	OCEAN ISLAND	KERGUELEN / KERGUELEN ARCHIPELAGO	COURBET PENINSULA, MONTS MAMMELLES	-48.55	-49.75	68.5	70.58	SAE			s_77100 [988]	GABBRO [988]									PLU					WR [988]	47.42	1.49		18.93		5.32	4.05		8.86	4.92	0.11		0.45	2.88	0.05		3.39	0.53
[988]	OCEAN ISLAND	KERGUELEN / KERGUELEN ARCHIPELAGO	COURBET PENINSULA, MONTS MAMMELLES	-48.55	-49.75	68.5	70.58	SAE			s_77132 [988]	SYENITE, QUARTZ [988]									PLU					WR [988]	51.52	2.05		16.26		8.46	3.12		4.15	2.05	0.13		3.1	3.86	0.54		3.16	0.63
[988]	OCEAN ISLAND	KERGUELEN / KERGUELEN ARCHIPELAGO	COURBET PENINSULA, MONTS MAMMELLES	-48.55	-49.75	68.5	70.58	SAE			s_77102B [988]	SYENITE, QUARTZ [988]									PLU					WR [988]	56.94	1.56		17.04		5.36	2.99		3.27	1.66	0.08		3.92	5.28			1.34	0.41
[988]	OCEAN ISLAND	KERGUELEN / KERGUELEN ARCHIPELAGO	COURBET PENINSULA, MONTS MAMMELLES	-48.55	-49.75	68.5	70.58	SAE			s_77103D [988]	GRANITE [988]									PLU					WR [988]	61.53	0.73		17.07		3.93	2.19		1.65	1.43	0.08		3.81	4.02	0.11		0.58	0.24
[988]	OCEAN ISLAND	KERGUELEN / KERGUELEN ARCHIPELAGO	LORANCHET PENINSULA, RIGHI MASSIF	-48.55	-49.75	68.5	70.58	SAE			s_8103 [988]	GABBRO [988]									PLU					WR [988]	46.99	2.9		14.79		5.96	5.98		9.51	6.1	0.13		0.74	2.59	0.39
[988]	OCEAN ISLAND	KERGUELEN / KERGUELEN ARCHIPELAGO / SHIELD STAGE	LORANCHET PENINSULA	-49	-49	69	69	SAE			s_8109 [988]	GABBRO [988]									PLU					WR [988]	49.09	1.73		20.32		3.78	4.8		11.5	3.67	0.12		0.44	2.92	0.22
[988]	OCEAN ISLAND	KERGUELEN / KERGUELEN ARCHIPELAGO / SHIELD STAGE	LORANCHET PENINSULA	-49	-49	69	69	SAE			s_8122 [988]	GABBRO [988]									PLU					WR [988]	49.02	1.77		19.61		2.88	5.91		10.48	3.54	0.12		0.59	3.02	0.25
[988]	OCEAN ISLAND	KERGUELEN / KERGUELEN ARCHIPELAGO / SHIELD STAGE	LORANCHET PENINSULA	-49	-49	69	69	SAE			s_8125 [988]	GABBRO [988]									PLU					WR [988]	49.46	1.68		19.85		2.66	6.39		10.88	3.44	0.13		0.56	3.06	0.24
[988]	OCEAN ISLAND	KERGUELEN / KERGUELEN ARCHIPELAGO	LORANCHET PENINSULA, LAC ATHENA	-48.55	-49.75	68.5	70.58	SAE			s_81103 [988]	GABBRO [988]									PLU					WR [988]	45.54	1.35		12.89		4.93	6.24		8.64	11.52	0.15		0.42	1.83	0.13
[988]	OCEAN ISLAND	KERGUELEN / KERGUELEN ARCHIPELAGO	LORANCHET PENINSULA, VALLEE DU THERMOMETRE	-48.55	-49.75	68.5	70.58	SAE			s_CN55 [988]	GABBRO [988]									PLU					WR [988]	45.88	1.43		15.45		4.68	6.5		9.63	7.56	0.19		0.22	2.86	0.12
[988]	OCEAN ISLAND	KERGUELEN / KERGUELEN ARCHIPELAGO	LORANCHET PENINSULA, RIGHI MASSIF	-48.55	-49.75	68.5	70.58	SAE			s_8135 [988]	ALBITITE, QUARTZ [988]									PLU					WR [988]	69.63	0.42		15.3		2.31	0.99		2.48	1.15	0.05		1.57	4.68	0.11
[988]	OCEAN ISLAND	KERGUELEN / KERGUELEN ARCHIPELAGO	LORANCHET PENINSULA, RIGHI MASSIF	-48.55	-49.75	68.5	70.58	SAE			s_8113 [988]	ALBITITE, QUARTZ [988]									PLU					WR [988]	66.76	0.4		14.49		2.06	1.25		4.19	0.49	0.05		1.25	3.66	0.12
[988]	OCEAN ISLAND	KERGUELEN / KERGUELEN ARCHIPELAGO		-48.55	-49.75	68.5	70.58	SAE			s_8082 [988]	GABBRO, BIOTITE [988]	16600000 [988]	16600000 [988]							PLU					WR [988]	43.87	3.58		16.91		4.25	9.08		11.08	6.02	0.15		0.97	2.41	0.14
[988]	OCEAN ISLAND	KERGUELEN / KERGUELEN ARCHIPELAGO		-48.55	-49.75	68.5	70.58	SAE			s_8025 [988]	GABBRO, BIOTITE [988]	16600000 [988]	16600000 [988]							PLU					WR [988]	45.42	3.36		16.81		4.2	8.24		10.04	3.9	0.23		1.42	3.25	1.08
[988]	OCEAN ISLAND	KERGUELEN / KERGUELEN ARCHIPELAGO		-48.55	-49.75	68.5	70.58	SAE			s_80143 [988]	GABBRO, BIOTITE [988]	16600000 [988]	16600000 [988]							PLU					WR [988]	48.17	2.94		15.08		3.59	6.46		6	5.17	0.14		3.5	3.91	0.71
[988]	OCEAN ISLAND	KERGUELEN / KERGUELEN ARCHIPELAGO		-48.55	-49.75	68.5	70.58	SAE			s_8024 [988]	GABBRO, BIOTITE [988]	16600000 [988]	16600000 [988]							PLU					WR [988]	49.36	1.96		20.14		2.69	4.8		9.24	2.51	0.12		2.08	3.43	0.72
[988]	OCEAN ISLAND	KERGUELEN / KERGUELEN ARCHIPELAGO		-48.55	-49.75	68.5	70.58	SAE			s_80144 [988]	SYENITE [988]	12400000 [988]	12400000 [988]							PLU					WR [988]	59.53	0.72		17.46		4.12	3.28		0.66		0.13		5.73	5.74	0.15
[988]	OCEAN ISLAND	KERGUELEN / KERGUELEN ARCHIPELAGO		-48.55	-49.75	68.5	70.58	SAE			s_80147 [988]	SYENITE [988]	12400000 [988]	12400000 [988]							PLU					WR [988]	62.58	0.18		16.95		3.77	1.75		0.56	0.14	0.19		5.04	6.44
[988]	OCEAN ISLAND	KERGUELEN / KERGUELEN ARCHIPELAGO		-48.55	-49.75	68.5	70.58	SAE			s_80108 [988]	SYENITE, QUARTZ [988]	12400000 [988]	12400000 [988]							PLU					WR [988]	64.55	0.37		16.36		2.8	1.89		0.79	0.1	0.13		5.77	5.36	0.04
[988]	OCEAN ISLAND	KERGUELEN / KERGUELEN ARCHIPELAGO		-48.55	-49.75	68.5	70.58	SAE			s_8099 [988]	SYENITE, QUARTZ [988]	12400000 [988]	12400000 [988]							PLU					WR [988]	69.43	0.16		14.36		2.11	1.05		0.16		0.14		5.99	4.52
[988]	OCEAN ISLAND	KERGUELEN / KERGUELEN ARCHIPELAGO		-48.55	-49.75	68.5	70.58	SAE			s_80102 [988]	GRANITE, ALKALINE [988]									PLU					WR [988]	72.56	0.04		13.3		2.44	0.83				0.07		5.46	4.1	0.13
[988]	OCEAN ISLAND	KERGUELEN / KERGUELEN ARCHIPELAGO	LORANCHET PENINSULA, CAP D^AIGUILLON	-48.55	-49.75	68.5	70.58	SAE			s_CN88 [988]	GABBRO [988]									PLU					WR [988]	51.93	3.25		12.53		4.65	7.66		6.89	4	0.19		1.94	3.61	0.31
[988]	OCEAN ISLAND	KERGUELEN / KERGUELEN ARCHIPELAGO	RALLIER DU BATY PENINSULA, RING COMPLEXES, SOUTH CENTER	-48.55	-49.75	68.5	70.58	SAE			s_PJ10 [988]	GABBRO, BIOTITE [988]									PLU					WR [988]	43.27	1.86		9.91		6.78	9.85		7.81	15.81			0.84	1.24	0.18		2.63	0.06
[988]	OCEAN ISLAND	KERGUELEN / KERGUELEN ARCHIPELAGO	RALLIER DU BATY PENINSULA, RING COMPLEXES, SOUTH CENTER	-48.55	-49.75	68.5	70.58	SAE			s_PJ4B [988]	GABBRO [988]									PLU					WR [988]	44.78	3.6		18.5		4.02	6.83		10.87	5.08	0.1		1.39	2.74			1.98	0.25
[988]	OCEAN ISLAND	KERGUELEN / KERGUELEN ARCHIPELAGO	RALLIER DU BATY PENINSULA, RING COMPLEXES, SOUTH CENTER	-48.55	-49.75	68.5	70.58	SAE			s_POS13 [988]	GABBRO, BIOTITE [988]									PLU					WR [988]	43.73	3.6		13.65		3.97	8.74		9.37	11.6	0.1		2.13	2.46			1.19	0.26
[988]	OCEAN ISLAND	KERGUELEN / KERGUELEN ARCHIPELAGO	RALLIER DU BATY PENINSULA, RING COMPLEXES, SOUTH CENTER	-48.55	-49.75	68.5	70.58	SAE			s_LIE1B [988]	SYENITE, QUARTZ [988]									PLU					WR [988]	59.08	1		17.64		2.97	2.77		2.64	0.62	0.09		6.65	5.45	0.16		0.62	0.22
[988]	OCEAN ISLAND	KERGUELEN / KERGUELEN ARCHIPELAGO	RALLIER DU BATY PENINSULA, RING COMPLEXES, SOUTH CENTER	-48.55	-49.75	68.5	70.58	SAE			s_LUT5 [988]	SYENITE, QUARTZ [988]									PLU					WR [988]	62.22	0.6		17.53		2.97	2.34		0.74	0.08	0.06		5.32	6.26	0.07		0.55	0.18
[988]	OCEAN ISLAND	KERGUELEN / KERGUELEN ARCHIPELAGO	RALLIER DU BATY PENINSULA, RING COMPLEXES, SOUTH CENTER	-48.55	-49.75	68.5	70.58	SAE			s_VEL1 [988]	SYENITE, QUARTZ [988]									PLU					WR [988]	63.45	0.58		17.08		2.51	2.46		0.59	0.28	0.09		5.79	5.91	0.09		0.65	0.2
[988]	OCEAN ISLAND	KERGUELEN / KERGUELEN ARCHIPELAGO	RALLIER DU BATY PENINSULA, RING COMPLEXES, SOUTH CENTER	-48.55	-49.75	68.5	70.58	SAE			s_AS1 [988]	SYENITE, QUARTZ [988]									PLU					WR [988]	61.42	1.13		15.44		4.28	2.95		0.73	0.48	0.04		5.73	6.03	0.02		1.05	0.33
[988]	OCEAN ISLAND	KERGUELEN / KERGUELEN ARCHIPELAGO	RALLIER DU BATY PENINSULA, RING COMPLEXES, SOUTH CENTER	-48.55	-49.75	68.5	70.58	SAE			s_2F11 [988]	SYENITE, QUARTZ [988]									PLU					WR [988]	69.68	0.47		14.37		2.38	1.44		0.02		0.04		4.18	5.54	0.09		0.67	0.18
[988]	OCEAN ISLAND	KERGUELEN / KERGUELEN ARCHIPELAGO	RALLIER DU BATY PENINSULA, RING COMPLEXES, SOUTH CENTER	-48.55	-49.75	68.5	70.58	SAE			s_2F17 [988]	GRANITE, ALKALINE [988]									PLU					WR [988]	75.48	0.29		11.58		3.57	0.36						4.07	3.87			0.55	0.18
[988]	OCEAN ISLAND	KERGUELEN / KERGUELEN ARCHIPELAGO	RALLIER DU BATY PENINSULA, RING COMPLEXES, SOUTH CENTER	-48.55	-49.75	68.5	70.58	SAE			s_CHAS1 [988]	GRANITE, ALKALINE [988]									PLU					WR [988]	74.28	0.26		12.77		1.45	1.35		0.02		0.03		4.2	4.03	0.09		1.19	0.16
[988]	OCEAN ISLAND	KERGUELEN / KERGUELEN ARCHIPELAGO	COURBET PENINSULA, MONTAGNES VERTES	-48.55	-49.75	68.5	70.58	SAE			s_MV9 [988]	GABBRO [988]									PLU					WR [988]	45.07	2.85		18.37		7.46	4.74		10.89	3.65	0.11		1.25	3.39	0.27		1.39	0.5
[988]	OCEAN ISLAND	KERGUELEN / KERGUELEN ARCHIPELAGO	COURBET PENINSULA, MONTAGNES VERTES	-48.55	-49.75	68.5	70.58	SAE			s_7738 [988]	GABBRO [988]									PLU					WR [988]	47.51	2.86		17.93		4.15	7.1		8.79	2.73	0.19		2.13	4.46	0.08		1.43	0.2
[988]	OCEAN ISLAND	KERGUELEN / KERGUELEN ARCHIPELAGO	COURBET PENINSULA, MONTAGNES VERTES	-48.55	-49.75	68.5	70.58	SAE			s_7718 [988]	GABBRO [988]									PLU					WR [988]	44.34	3.23		14.77		7.77	5.59		9.77	5.03	0.19		1.91	3.91	0.36		1.58	0.38
[988]	OCEAN ISLAND	KERGUELEN / KERGUELEN ARCHIPELAGO	COURBET PENINSULA, MONTAGNES VERTES	-48.55	-49.75	68.5	70.58	SAE			s_7745 [988]	MONZONITE [988]									PLU					WR [988]	50	1.83		16.79		4.06	5.65		5.36	2.5	0.13		2.1	4.53	0.52		3.61	0.47
[988]	OCEAN ISLAND	KERGUELEN / KERGUELEN ARCHIPELAGO	COURBET PENINSULA, MONTAGNES VERTES	-48.55	-49.75	68.5	70.58	SAE			s_7705 [988]	MONZOGABBRO [988]									PLU					WR [988]	46.53	2.66		16.97		7.82	4.58		8.06	2.94	0.21		3.1	5.16	1.28		1.42	1.28
[988]	OCEAN ISLAND	KERGUELEN / KERGUELEN ARCHIPELAGO	COURBET PENINSULA, MONTAGNES VERTES	-48.55	-49.75	68.5	70.58	SAE			s_7741 [988]	MONZOSYENITE, NEPHELINE [988]									PLU					WR [988]	55.53	1.07		19.37		4.42	2.49		2.67	0.79	0.15		5.21	5.99	0.21		1.56	0.26
[988]	OCEAN ISLAND	KERGUELEN / KERGUELEN ARCHIPELAGO	COURBET PENINSULA, MONTAGNES VERTES	-48.55	-49.75	68.5	70.58	SAE			s_7714 [988]	SYENITE [988]									PLU					WR [988]	61.19	0.73		18.44		2.92	0.81		1.01	0.38	0.06		4.36	5.34	0.29		1.33	0.64
[988]	OCEAN ISLAND	KERGUELEN / KERGUELEN ARCHIPELAGO	LORANCHET PENINSULA, PRESQU^ILE DE GEOGRAPHIE	-48.55	-49.75	68.5	70.58	SAE			s_CN14 [988]	GABBRO [988]									PLU					WR [988]	44.55	2.94		15.83		4.12	6.73		9.25	3.98	0.16		2.95	4.24	1.23
[988]	OCEAN ISLAND	KERGUELEN / KERGUELEN ARCHIPELAGO	LORANCHET PENINSULA, PRESQU^ILE DE GEOGRAPHIE	-48.55	-49.75	68.5	70.58	SAE			s_CN44B [988]	GABBRO [988]									PLU					WR [988]	47.34	2.7		17.45		3.48	6.02		8.36	3.92	0.17		3.97	3.49	0.63
[988]	OCEAN ISLAND	KERGUELEN / KERGUELEN ARCHIPELAGO	LORANCHET PENINSULA, PRESQU^ILE DE GEOGRAPHIE	-48.55	-49.75	68.5	70.58	SAE			s_CN60 [988]	GABBRO [988]									PLU					WR [988]	52.22	2.22		17.46		2.15	6.19		6.28	3.51	0.13		3.92	4.14	0.64
[988]	OCEAN ISLAND	KERGUELEN / KERGUELEN ARCHIPELAGO	LORANCHET PENINSULA, PRESQU^ILE DE GEOGRAPHIE	-48.55	-49.75	68.5	70.58	SAE			s_8159 [988]	GABBRO [988]									PLU					WR [988]	55.43	0.06		19.97		2.54	1.91		0.56	0.1	0.14		6.27	7.26	0.01
[988]	OCEAN ISLAND	KERGUELEN / KERGUELEN ARCHIPELAGO	LORANCHET PENINSULA, PRESQU^ILE DE GEOGRAPHIE	-48.55	-49.75	68.5	70.58	SAE			s_8150 [988]	GABBRO [988]									PLU					WR [988]	59.88	0.59		19.44		1.24	3.08		2.07	0.42	0.11		6.44	5.82	0.1
[988]	OCEAN ISLAND	KERGUELEN / KERGUELEN ARCHIPELAGO	LORANCHET PENINSULA, PRESQU^ILE DE GEOGRAPHIE	-48.55	-49.75	68.5	70.58	SAE			s_8190 [988]	GABBRO [988]									PLU					WR [988]	63.19	0.08		17.11		2.1	1.8		0.85		0.13		5.12	6.5	0.02
[988]	OCEAN ISLAND	KERGUELEN / KERGUELEN ARCHIPELAGO	LORANCHET PENINSULA, PRESQU^ILE DE GEOGRAPHIE	-48.55	-49.75	68.5	70.58	SAE			s_81100 [988]	GABBRO [988]									PLU					WR [988]	65.99			17.32		1.91	1.35		0.26		0.1		4.92	7.13
[988]	OCEAN ISLAND	KERGUELEN / KERGUELEN ARCHIPELAGO	MONTS BALLONS	-48.55	-49.75	68.5	70.58	SAE			s_7869B [988]	GABBRO [988]	13800000 [988]	13800000 [988]							PLU					WR [988]	44.96	2.67		18.22		6.3	3.57		9.94	3.83	0.15		2.17	3.95	1.09
[988]	OCEAN ISLAND	KERGUELEN / KERGUELEN ARCHIPELAGO	MONTS BALLONS	-48.55	-49.75	68.5	70.58	SAE			s_7856 [988]	GABBRO [988]	13800000 [988]	13800000 [988]							PLU					WR [988]	46.72	3.09		15.56		7.5	3.42		8.08	5.8	0.17		3.04	4.12	0.74
[988]	OCEAN ISLAND	KERGUELEN / KERGUELEN ARCHIPELAGO	MONTS BALLONS	-48.55	-49.75	68.5	70.58	SAE			s_7846 [988]	SYENITE, NEPHELINE [988]									PLU					WR [988]	55.62	0.61		20.42		2.92	1.96		2.22	0.65	0.13		5.78	6.74	0.22
[988]	OCEAN ISLAND	KERGUELEN / KERGUELEN ARCHIPELAGO	MONTS BALLONS	-48.55	-49.75	68.5	70.58	SAE			s_7833 [988]	SYENITE [988]	12600000 [988]	12600000 [988]							PLU					WR [988]	57.58	0.09		22.8		1.35	1.7		0.71		0.1		6.07	8.33
[988]	OCEAN ISLAND	KERGUELEN / KERGUELEN ARCHIPELAGO	MONTS BALLONS	-48.55	-49.75	68.5	70.58	SAE			s_7857 [988]	SYENITE, NEPHELINE [988]	12600000 [988]	12600000 [988]							PLU					WR [988]	59.63	0.69		18.68		2.11	3.61		1.86	0.56	0.19		6.06	5.52	0.16
[988]	OCEAN ISLAND	KERGUELEN / KERGUELEN ARCHIPELAGO	MONTS BALLONS	-48.55	-49.75	68.5	70.58	SAE			s_7861 [988]	SYENITE, NEPHELINE [988]	12600000 [988]	12600000 [988]							PLU					WR [988]	59.25	0.51		19.07		2.02	3.18		1.66	0.37	0.13		6.78	5.51	0.19
[988]	OCEAN ISLAND	KERGUELEN / KERGUELEN ARCHIPELAGO	LORANCHET PENINSULA, LAC ATHENA	-48.55	-49.75	68.5	70.58	SAE			s_81104 [988]	GABBRO [988]									PLU					WR [988]	48.15	3.37		12.54		10.11	5.44		5.76	4.42	0.21		1.98	4.05	0.47
[988]	OCEAN ISLAND	KERGUELEN / KERGUELEN ARCHIPELAGO	LORANCHET PENINSULA, VALLEE DU THERMOMETRE	-48.55	-49.75	68.5	70.58	SAE			s_81112 [988]	GABBRO [988]									PLU					WR [988]	45.65	2.71		15.53		6.05	6.02		5.92	4.8	0.18		3.05	3.67	0.74
[988]	OCEAN ISLAND	KERGUELEN / KERGUELEN ARCHIPELAGO	LORANCHET PENINSULA, NEAR RIGHI MASSIF	-48.55	-49.75	68.5	70.58	SAE			s_8129 [988]	SYENITE, NEPHELINE [988]									PLU					WR [988]	58.44	0.44		19.2		1.78	1.3		1.32	1.2	0.05		10.15	3.4	0.09
[11266]	OCEAN ISLAND	KERGUELEN / KERGUELEN ARCHIPELAGO	VAL GABBRO	-49.7	-49.7	70.1	70.1	SAE			s_K91 [11266]	PYROXENITE, OLIVINE-PLAGIOCLASE [11266]									PLU					WR [11266]	42.41	1.51		7.07		6.89	6.69		12.86	14.93	0.2		0.09	0.31	0.01	6.06
[11266]	OCEAN ISLAND	KERGUELEN / KERGUELEN ARCHIPELAGO	VAL GABBRO	-49.7	-49.7	70.1	70.1	SAE			s_7804B [11266]	GABBRO [11266]									PLU					WR [11266]	46.07	1.65		11.26		4.03	4.98		18.18	11	0.15		0.17	1.12	0.12	1.08
[11266]	OCEAN ISLAND	KERGUELEN / KERGUELEN ARCHIPELAGO	VAL GABBRO	-49.7	-49.7	70.1	70.1	SAE			s_7801 [11266]	GABBRO, BIOTITE [11266]									PLU					WR [11266]	45.65	1.16		15.25		4.08	4.49		17.06	9.63	0.11		0.11	1.36	0.21	1.42
[11266]	OCEAN ISLAND	KERGUELEN / KERGUELEN ARCHIPELAGO	VAL GABBRO	-49.7	-49.7	70.1	70.1	SAE			s_K90 [11266]	GABBRO, CLINOPYROXENE-OLIVINE [11266]									PLU					WR [11266]	40.55	2.95		18.02		10	6.61		12.7	6.55	0.2		0.33	1.02	0.13	1.55
[11266]	OCEAN ISLAND	KERGUELEN / KERGUELEN ARCHIPELAGO	VAL GABBRO	-49.7	-49.7	70.1	70.1	SAE			s_7805 [11266]	GABBRO [11266]									PLU					WR [11266]	43.6	0.78		16.26		4.68	6.66		11.27	12.56	0.14		0.12	1.29	0.11	1.15
[11266]	OCEAN ISLAND	KERGUELEN / KERGUELEN ARCHIPELAGO	VAL GABBRO	-49.7	-49.7	70.1	70.1	SAE			s_7804A [11266]	GABBRO [11266]									PLU					WR [11266]	43.7	0.76		18.83		5.53	4.5		12.6	9.06	0.05		0.16	1.55	0.18	1.52
[11266]	OCEAN ISLAND	KERGUELEN / KERGUELEN ARCHIPELAGO	VAL GABBRO	-49.7	-49.7	70.1	70.1	SAE			s_7812 [11266]	GABBRO, BIOTITE [11266]									PLU					WR [11266]	44.92	1.7		12.92		4.58	7.19		14.26	11.1	0.12		0.54	1.43	0.05	1.5
[11266]	OCEAN ISLAND	KERGUELEN / KERGUELEN ARCHIPELAGO	VAL GABBRO	-49.7	-49.7	70.1	70.1	SAE			s_7814 [11266]	GABBRO [11266]									PLU					WR [11266]	46.11	1.6		15.14		1.5	9.32		13.06	7.92	0.1		0.04	1.83	0.11	4.17
[11266]	OCEAN ISLAND	KERGUELEN / KERGUELEN ARCHIPELAGO	VAL GABBRO	-49.7	-49.7	70.1	70.1	SAE			s_K92 [11266]	GABBRO [11266]									PLU					WR [11266]	42.82	2.95		17.28		5.09	7.88		11.65	6.73	0.2		0.34	2.07		2.62
[11266]	OCEAN ISLAND	KERGUELEN / KERGUELEN ARCHIPELAGO	VAL GABBRO	-49.7	-49.7	70.1	70.1	SAE			s_7811 [11266]	GABBRO, BIOTITE [11266]									PLU					WR [11266]	43.46	2.5		15.83		6.94	6.14		14.13	6.77	0.21		0.73	2.52	0.1	1.24
[11266]	OCEAN ISLAND	KERGUELEN / KERGUELEN ARCHIPELAGO	VAL GABBRO	-49.7	-49.7	70.1	70.1	SAE			s_7802 [11266]	GABBRO, BIOTITE [11266]									PLU					WR [11266]	47.61	0.73		14.86		3.63	5.24		14.28	9.64	0.2		0.38	2.48	0.22	1.09
[11266]	OCEAN ISLAND	KERGUELEN / KERGUELEN ARCHIPELAGO	VAL GABBRO	-49.7	-49.7	70.1	70.1	SAE			s_K94 [11266]	GABBRO [11266]									PLU					WR [11266]	45.39	2.42		18.7		5.44	5.54		12.15	4.99	0.09		0.51	2.72	0.15	1.45
[11266]	OCEAN ISLAND	KERGUELEN / KERGUELEN ARCHIPELAGO	VAL GABBRO	-49.7	-49.7	70.1	70.1	SAE			s_7810 [11266]	GABBRO, ORTHOPYROXENE-BIOTITE [11266]									PLU					WR [11266]	49.4	2.11		19.64		4.54	4.22		9.75	3.87	0.26		1.26	3.83		0.77
[11266]	OCEAN ISLAND	KERGUELEN / KERGUELEN ARCHIPELAGO	VAL GABBRO	-49.7	-49.7	70.1	70.1	SAE			s_7808 [11266]	SYENITE, QUARTZ [11266]									PLU					WR [11266]	57.01	1.45		16.57		5.43	2.97		3.65	2.02	0.3		3.85	4.65	0.2	1.52
[11266]	OCEAN ISLAND	KERGUELEN / KERGUELEN ARCHIPELAGO	VAL GABBRO	-49.7	-49.7	70.1	70.1	SAE			s_7806 [11266]	SYENITE, QUARTZ [11266]									PLU					WR [11266]	57.64	1.33		17.27		5.43	2.15		3.14	1.23	0.02		4.16	4.57	0.2	1.11
[11266]	OCEAN ISLAND	KERGUELEN / KERGUELEN ARCHIPELAGO	VAL GABBRO	-49.7	-49.7	70.1	70.1	SAE			s_7813 [11266]	SYENITE, QUARTZ [11266]									PLU					WR [11266]	58.38	1.02		18.83		4.08	2.19		3.37	0.69	0.1		5.15	4.51	0.08	0.92
[1002]	OCEAN ISLAND	KERGUELEN / KERGUELEN ARCHIPELAGO / MOUNT TIZZARD	JEANNE D^ARC PENINSULA	-48.55	-49.75	68.5	70.58	SAE			s_MG-91-106ACIDDISSOLUTION [1002]	GABBRO, ILMENITE [1002]								HETEROGRANULAR GRANOBLASTIC [1002]	PLU					WR [1002]
[1002]	OCEAN ISLAND	KERGUELEN / KERGUELEN ARCHIPELAGO / MOUNT TIZZARD	JEANNE D^ARC PENINSULA	-48.55	-49.75	68.5	70.58	SAE			s_MG-91-106ALKALINEDISSOLUTION [1002]	GABBRO, ILMENITE [1002]								HETEROGRANULAR GRANOBLASTIC [1002]	PLU					WR [1002]
[1002]	OCEAN ISLAND	KERGUELEN / KERGUELEN ARCHIPELAGO / MOUNT TIZZARD	JEANNE D^ARC PENINSULA	-48.55	-49.75	68.5	70.58	SAE			s_MG-91-116 [1002]	GABBRO [1002]								HETEROGRANULAR GRANOBLASTIC-MOSAIC [1002]	PLU					WR [1002]
[1002]	OCEAN ISLAND	KERGUELEN / KERGUELEN ARCHIPELAGO / MOUNT TIZZARD	JEANNE D^ARC PENINSULA	-48.55	-49.75	68.5	70.58	SAE			s_ARC835 [1002]	GABBRO, SAPPHIRINE [1002]								HETEROGRANULAR GRANOBLASTIC-MOSAIC [1002]	PLU					WR [1002]
[847]	OCEAN ISLAND	KERGUELEN / KERGUELEN ARCHIPELAGO / MOUNT ROSS		-49.58	-49.58	69.5	69.5	SAE			s_145 [847]	GABBRO [847]								DOLERITIC [847]	PLU					WR [847]
[847]	OCEAN ISLAND	KERGUELEN / KERGUELEN ARCHIPELAGO / MOUNT ROSS		-49.58	-49.58	69.5	69.5	SAE			s_83 [847]	GABBRO [847]								DOLERITIC [847]	PLU					WR [847]
[549]	OCEAN ISLAND	KERGUELEN / KERGUELEN ARCHIPELAGO	RALLIER DU BATY PENINSULA	-48.55	-49.75	68.5	70.58	SAE			s_LL1 [549]	SYENITE [549]									PLU					WR [549]	64.53	0.71		16.28		3.25	1.9		0.5	0.35	0.17		5.92	6.2
[549]	OCEAN ISLAND	KERGUELEN / KERGUELEN ARCHIPELAGO	RALLIER DU BATY PENINSULA	-48.55	-49.75	68.5	70.58	SAE			s_L2 [549]	SYENITE [549]									PLU					WR [549]	63.48	0.77		15.67		4.75	0.37		0.1	0.15	0.12		6.01	6.24
[549]	OCEAN ISLAND	KERGUELEN / KERGUELEN ARCHIPELAGO	RALLIER DU BATY PENINSULA	-48.55	-49.75	68.5	70.58	SAE			s_P1 [549]	SYENITE [549]									PLU					WR [549]	63.5	0.99		15.9		2.28	2.42		0.94	0.6	0.14		6.24	5.92
[549]	OCEAN ISLAND	KERGUELEN / KERGUELEN ARCHIPELAGO	RALLIER DU BATY PENINSULA	-48.55	-49.75	68.5	70.58	SAE			s_P14 [549]	GRANITE [549]									PLU					WR [549]	68.97	0.36		14.71		2.28	1.51				0.12		5.14	5.87
[549]	OCEAN ISLAND	KERGUELEN / KERGUELEN ARCHIPELAGO	RALLIER DU BATY PENINSULA	-48.55	-49.75	68.5	70.58	SAE			s_DF16 [549]	SYENITE [549]									PLU					WR [549]	65.82	0.4		16.13		1.42	2.16		0.4	0.25	0.13		5.42	6.01
[549]	OCEAN ISLAND	KERGUELEN / KERGUELEN ARCHIPELAGO	RALLIER DU BATY PENINSULA	-48.55	-49.75	68.5	70.58	SAE			s_LL14 [549]	SYENITE [549]									PLU					WR [549]	63.48	0.63		15.67		2.76	1.8		0.84	0.45	0.13		6.11	5.73
[549]	OCEAN ISLAND	KERGUELEN / KERGUELEN ARCHIPELAGO	RALLIER DU BATY PENINSULA	-48.55	-49.75	68.5	70.58	SAE			s_VA80 [549]	SYENITE [549]									PLU					WR [549]	63.66	0.79		17.25		1.39	2.09		1.13	0.56	0.08		6.44	5.68
[549]	OCEAN ISLAND	KERGUELEN / KERGUELEN ARCHIPELAGO	COURBET PENINSULA, MONTAGNES VERTES	-48.55	-49.75	68.5	70.58	SAE			s_77.35 [549]	GABBRO [549]									PLU					WR [549]	44.52	3.08		18.64		6.62	6.64		10.12	3.2	0.1		1.65	3.12	0.44		0.83	0.14
[549]	OCEAN ISLAND	KERGUELEN / KERGUELEN ARCHIPELAGO	COURBET PENINSULA, MONTAGNES VERTES	-48.55	-49.75	68.5	70.58	SAE			s_MV1 [549]	MONZOGABBRO [549]									PLU					WR [549]	47.6	2.71		19.44		4.13	5.44		7.93	3.2	0.19		2.67	4.79	0.77		0.82
[549]	OCEAN ISLAND	KERGUELEN / KERGUELEN ARCHIPELAGO	COURBET PENINSULA, MONTAGNES VERTES	-48.55	-49.75	68.5	70.58	SAE			s_77-60 [549]	MONZONITE [549]									PLU					WR [549]	60.92	1.8		17.71		4.64	4.86		5.13	2.56	0.13		2.92	4.44	0.08		2.67	0.52
[549]	OCEAN ISLAND	KERGUELEN / KERGUELEN ARCHIPELAGO	COURBET PENINSULA, MONTAGNES VERTES	-48.55	-49.75	68.5	70.58	SAE			s_77-49 [549]	MONZOGABBRO [549]									PLU					WR [549]	44.22	3.29		19.76		4.74	5.83		10.43	3.59	0.11		1.41	3.4	0.36		2.01	0.3
[549]	OCEAN ISLAND	KERGUELEN / KERGUELEN ARCHIPELAGO	COURBET PENINSULA, MONTAGNES VERTES	-48.55	-49.75	68.5	70.58	SAE			s_77-20 [549]	SYENITE [549]									PLU					WR [549]	50.74	1.38		17.31		5.31	4.29		4.76	1.78	0.14		3.94	6.31	0.64		2.26	0.25
[549]	OCEAN ISLAND	KERGUELEN / KERGUELEN ARCHIPELAGO	COURBET PENINSULA, MONTAGNES VERTES	-48.55	-49.75	68.5	70.58	SAE			s_MV2 [549]	SYENITE [549]									PLU					WR [549]	61.19	0.73		18.44		2.92	0.81		1.01	0.38	0.06		4.36	5.34	0.29		1.83	0.64
[549]	OCEAN ISLAND	KERGUELEN / KERGUELEN ARCHIPELAGO	COURBET PENINSULA, MONTAGNES VERTES	-48.55	-49.75	68.5	70.58	SAE			s_77-103C [549]	GRANITE [549]									PLU					WR [549]	68.34	0.61		13.73		3.35	1.35		0.29	1.65			5.96	4.1	0.19		0.67
[549]	OCEAN ISLAND	KERGUELEN / KERGUELEN ARCHIPELAGO	MONTS BALLONS	-48.55	-49.75	68.5	70.58	SAE			s_78-47 [549]	SYENITE, NEPHELINE [549]									PLU					WR [549]	57.62	0.55		19.49				5.11	2.29	0.53	0.18		6.18	6.4	0.21
[549]	OCEAN ISLAND	KERGUELEN / KERGUELEN ARCHIPELAGO	MONTS BALLONS	-48.55	-49.75	68.5	70.58	SAE			s_78-48 [549]	SYENITE, NEPHELINE [549]									PLU					WR [549]	53.86	1.03		19.58				5.83	3.33	1.16	0.15		5.51	6.14	0.34
[549]	OCEAN ISLAND	KERGUELEN / KERGUELEN ARCHIPELAGO	MONTS BALLONS	-48.55	-49.75	68.5	70.58	SAE			s_78-64 [549]	SYENITE, NEPHELINE [549]									PLU					WR [549]	57.2	0.67		17.8				7.66	2.21	0.5	0.2		6.13	5.14
[990][989][515]	OCEAN ISLAND	KERGUELEN / KERGUELEN ARCHIPELAGO		-48.55	-49.75	68.5	70.58	SAE			s_2621 [990]	GABBRO [990]	14000000 [990]	14000000 [990]							PLU					WR [990]
[4649]	OCEAN ISLAND	KERGUELEN / KERGUELEN ARCHIPELAGO	RONARC^H PENINSULA, VAL PHONOLITE	-48.55	-49.75	68.5	70.58	SAE	150	150	s_MG-91-144A [4649]	HORNBLENDITE [4649]									PLU					WR [4649]	40.98	4.39		12.36				7.1	11.01	15.82	0.11		1.23	3.06	0.08
[4649]	OCEAN ISLAND	KERGUELEN / KERGUELEN ARCHIPELAGO	RONARC^H PENINSULA, T TE DE L¥HOMME	-48.55	-49.75	68.5	70.58	SAE			s_AGL91-29 [4649]	LAMPROPHYRE [4649]									PLU					WR [4649]	42.69	4.72		12.8				10.91	8.29	7.36	0.15		2.72	3.35	0.69
[1002][1003]	OCEAN ISLAND	KERGUELEN / KERGUELEN ARCHIPELAGO	JEANNE D^ARC PENINSULA, DOME ROUGE	-48.55	-49.75	68.5	70.58	SAE			s_MG-91-8 [1002]	HARZBURGITE, XENOLITH [1002]								COARSE-GRAINED [1002]	PER				HE3_HE4 from OLIVINE [1003], HE3_HE4(R/R(A)) from OLIVINE [1003]	WR [1002] / MIN [1003]
[1002][1003]	OCEAN ISLAND	KERGUELEN / KERGUELEN ARCHIPELAGO / MOUNT TIZZARD	JEANNE D^ARC PENINSULA	-48.55	-49.75	68.5	70.58	SAE			s_GM-92-234 [1002]	WEBSTERITE, OLIVINE, XENOLITH [1002] / WEBSTERITE, XENOLITH [1003]								HETEROGRANULAR GRANOBLASTIC-MOSAIC [1002]	PER					WR [1002]
[1452][1002][1003]	OCEAN ISLAND	KERGUELEN / KERGUELEN ARCHIPELAGO / MOUNT TIZZARD	JEANNE D^ARC PENINSULA	-48.55	-49.75	68.5	70.58	SAE			s_92-286 [1452] / s_GM-92-286 [1002]	DUNITE, XENOLITH [1452]								COARSE-GRAINED [1002]	PER				HE3_HE4 from OLIVINE [1003], HE3_HE4(R/R(A)) from OLIVINE [1003]	WR [1452] / MIN [1003]
[20779]	OCEAN ISLAND	KERGUELEN / KERGUELEN ARCHIPELAGO / SHIELD STAGE	LAC MICHELE, LORANCHET PENINSULA	-49	-49	69	69	SAE			s_BY 96 364 [20779]	HARZBURGITE, SPINEL, XENOLITH [20779]									PER					WR [20779]	44.05	0.0225365		0.806489	0.453195			7.40192	0.707474	45.5654	0.120432			0.0286275
[20779]	OCEAN ISLAND	KERGUELEN / KERGUELEN ARCHIPELAGO / SHIELD STAGE	LAC MICHELE, LORANCHET PENINSULA	-49	-49	69	69	SAE			s_BY 96 366 [20779]	HARZBURGITE, SPINEL, XENOLITH [20779]									PER					WR [20779]	43.332	0.00304521		0.697306	0.436737			7.19547	0.810493	46.3799	0.11583			0.0142704
[20779]	OCEAN ISLAND	KERGUELEN / KERGUELEN ARCHIPELAGO / SHIELD STAGE	LAC MICHELE, LORANCHET PENINSULA	-49	-49	69	69	SAE			s_BY 96 376 [20779]	HARZBURGITE, SPINEL, XENOLITH [20779]									PER					WR [20779]	43.4278	0.0145323		0.823138	0.314811			7.19762	0.584347	46.3869	0.115055			0.0200006
[20779]	OCEAN ISLAND	KERGUELEN / KERGUELEN ARCHIPELAGO / SHIELD STAGE	LAC MICHELE, LORANCHET PENINSULA	-49	-49	69	69	SAE			s_BY 96 378 [20779]	HARZBURGITE, SPINEL, XENOLITH [20779]									PER					WR [20779]	42.8688	3.63486e-05		0.646607	0.497101			7.50548	0.492759	47.0175	0.119738			0.000936596
[20779]	OCEAN ISLAND	KERGUELEN / KERGUELEN ARCHIPELAGO / SHIELD STAGE	LAC MICHELE, LORANCHET PENINSULA	-49	-49	69	69	SAE			s_BY 96 390 [20779]	HARZBURGITE, SPINEL, XENOLITH [20779]									PER					WR [20779]	43.3316	0.00240194		0.74094	0.455009			7.20924	0.551124	46.1646	0.116112			0.00445331
[20779]	OCEAN ISLAND	KERGUELEN / KERGUELEN ARCHIPELAGO / SHIELD STAGE	LAC MICHELE, LORANCHET PENINSULA	-49	-49	69	69	SAE			s_TC 06 019 [20779]	HARZBURGITE, SPINEL, XENOLITH [20779]									PER					WR [20779]	43.8546	0.00416709		0.79523	0.359549			7.1508	0.64978	45.9382	0.116127			0.00794059
[20779]	OCEAN ISLAND	KERGUELEN / KERGUELEN ARCHIPELAGO / SHIELD STAGE	LAC MICHELE, LORANCHET PENINSULA	-49	-49	69	69	SAE			s_TC 06 125 [20779]	HARZBURGITE, SPINEL, XENOLITH [20779]									PER					WR [20779]	43.1519	0.0161451		0.755545	0.479852			7.57165	0.520704	46.6148	0.114864			0.0274908
[20779]	OCEAN ISLAND	KERGUELEN / KERGUELEN ARCHIPELAGO / SHIELD STAGE	LAC MICHELE, LORANCHET PENINSULA	-49	-49	69	69	SAE			s_TC 06 128 [20779]	HARZBURGITE, SPINEL, XENOLITH [20779]									PER					WR [20779]	43.3808	0.00406352		0.775145	0.33446			7.32831	0.568405	46.5769	0.117474			0.0265934
[20779]	OCEAN ISLAND	KERGUELEN / KERGUELEN ARCHIPELAGO / SHIELD STAGE	LAC MICHELE, LORANCHET PENINSULA	-49	-49	69	69	SAE			s_TC 06 132 [20779]	HARZBURGITE, SPINEL, XENOLITH [20779]									PER					WR [20779]	44.1659	0.0316629		0.983998	0.448683			7.2871	1.07262	44.492	0.118164			0.0360542
[20779]	OCEAN ISLAND	KERGUELEN / KERGUELEN ARCHIPELAGO / SHIELD STAGE	LAC MICHELE, LORANCHET PENINSULA	-49	-49	69	69	SAE			s_TC 06 146 [20779]	HARZBURGITE, SPINEL, XENOLITH [20779]									PER					WR [20779]	43.979	0.00419147		0.909196	0.585301			7.16604	0.674575	45.3989	0.116572			0.0247769
[20779]	OCEAN ISLAND	KERGUELEN / KERGUELEN ARCHIPELAGO / SHIELD STAGE	LAC MICHELE, LORANCHET PENINSULA	-49	-49	69	69	SAE			s_TC 06 149 [20779]	HARZBURGITE, SPINEL, XENOLITH [20779]									PER					WR [20779]	43.6675	0.014882		0.760484	0.252891			7.33703	0.647236	46.302	0.117745			0.00770061
[20779]	OCEAN ISLAND	KERGUELEN / KERGUELEN ARCHIPELAGO / SHIELD STAGE	LAC MICHELE, LORANCHET PENINSULA	-49	-49	69	69	SAE			s_BY 96 371 [20779]	HARZBURGITE, SPINEL, XENOLITH [20779]									PER					WR [20779]	44.1185	0.00852541		0.832028	0.390853			6.37403	0.615966	46.391	0.118805			0.0482498
[20779]	OCEAN ISLAND	KERGUELEN / KERGUELEN ARCHIPELAGO / SHIELD STAGE	LAC MICHELE, LORANCHET PENINSULA	-49	-49	69	69	SAE			s_BY 96 372 [20779]	HARZBURGITE, SPINEL, XENOLITH [20779]									PER					WR [20779]	44.6251	0.0192148		0.96157	0.482324			6.89388	0.689459	46.0452	0.117807			0.0297039
[20779]	OCEAN ISLAND	KERGUELEN / KERGUELEN ARCHIPELAGO / SHIELD STAGE	LAC MICHELE, LORANCHET PENINSULA	-49	-49	69	69	SAE			s_BY 96 373 [20779]	HARZBURGITE, SPINEL, XENOLITH [20779]									PER					WR [20779]	43.7596	0.0133221		0.757987	0.354426			6.79498	0.570293	46.4885	0.114537			0.0376731
[20779]	OCEAN ISLAND	KERGUELEN / KERGUELEN ARCHIPELAGO / SHIELD STAGE	LAC MICHELE, LORANCHET PENINSULA	-49	-49	69	69	SAE			s_BY 96 375 [20779]	HARZBURGITE, SPINEL, XENOLITH [20779]									PER					WR [20779]	44.1109	0.0123245		0.909169	0.301391			7.18609	0.59603	46.6633	0.115433			0.0165623
[20779]	OCEAN ISLAND	KERGUELEN / KERGUELEN ARCHIPELAGO / SHIELD STAGE	LAC MICHELE, LORANCHET PENINSULA	-49	-49	69	69	SAE			s_BY 96 377 [20779]	HARZBURGITE, SPINEL, XENOLITH [20779]									PER					WR [20779]	42.9855	0.0223977		0.620432	0.246824			6.31492	0.459609	47.4539	0.116662			0.0743018
[20779]	OCEAN ISLAND	KERGUELEN / KERGUELEN ARCHIPELAGO / SHIELD STAGE	LAC MICHELE, LORANCHET PENINSULA	-49	-49	69	69	SAE			s_BY 96 379 [20779]	HARZBURGITE, SPINEL, XENOLITH [20779]									PER					WR [20779]	44.6124	0.00294965		0.862205	0.57472			6.59597	0.670276	45.9115	0.11889			0.0019624
[20779]	OCEAN ISLAND	KERGUELEN / KERGUELEN ARCHIPELAGO / SHIELD STAGE	LAC MICHELE, LORANCHET PENINSULA	-49	-49	69	69	SAE			s_TC 06 126 [20779]	HARZBURGITE, SPINEL, XENOLITH [20779]									PER					WR [20779]	43.7915	0.00626905		0.758356	0.293906			7.08503	0.600489	45.8366	0.115246			0.0185658
[20779]	OCEAN ISLAND	KERGUELEN / KERGUELEN ARCHIPELAGO / SHIELD STAGE	LAC MICHELE, LORANCHET PENINSULA	-49	-49	69	69	SAE			s_TC 06 131 [20779]	HARZBURGITE, SPINEL, XENOLITH [20779]									PER					WR [20779]	44.1083	0.024506		1.01409	0.469178			6.13933	0.859045	45.904	0.118129			0.0675717
[20779]	OCEAN ISLAND	KERGUELEN / KERGUELEN ARCHIPELAGO / SHIELD STAGE	LAC MICHELE, LORANCHET PENINSULA	-49	-49	69	69	SAE			s_TC 06 133 [20779]	HARZBURGITE, SPINEL, XENOLITH [20779]									PER					WR [20779]	43.4504	0.00506817		0.750207	0.336032			6.89747	0.588879	46.522	0.116577			0.0476637
[20779]	OCEAN ISLAND	KERGUELEN / KERGUELEN ARCHIPELAGO / SHIELD STAGE	LAC MICHELE, LORANCHET PENINSULA	-49	-49	69	69	SAE			s_TC 06 134 [20779]	HARZBURGITE, SPINEL, XENOLITH [20779]									PER					WR [20779]	43.5547	0.00278615		0.696195	0.360968			7.11043	0.487558	46.9397	0.114917			0.00177956
[20779]	OCEAN ISLAND	KERGUELEN / KERGUELEN ARCHIPELAGO / SHIELD STAGE	LAC MICHELE, LORANCHET PENINSULA	-49	-49	69	69	SAE			s_TC 06 139 [20779]	HARZBURGITE, SPINEL, XENOLITH [20779]									PER					WR [20779]	43.9369	0.0135541		0.763832	0.372212			7.20558	0.610312	46.5287	0.116948			0.00100721
[20779]	OCEAN ISLAND	KERGUELEN / KERGUELEN ARCHIPELAGO / SHIELD STAGE	LAC MICHELE, LORANCHET PENINSULA	-49	-49	69	69	SAE			s_TC 06 141 [20779]	HARZBURGITE, SPINEL, XENOLITH [20779]									PER					WR [20779]	43.6217	0.00987364		0.760837	0.424314			6.48457	0.622611	46.5234	0.122709			0.00123579
[20779]	OCEAN ISLAND	KERGUELEN / KERGUELEN ARCHIPELAGO / SHIELD STAGE	LAC MICHELE, LORANCHET PENINSULA	-49	-49	69	69	SAE			s_TC 06 142 [20779]	HARZBURGITE, SPINEL, XENOLITH [20779]									PER					WR [20779]	43.9649	0.0296191		0.864881	0.226614			7.09643	0.626353	45.8553	0.11512			0.0245187
[20779]	OCEAN ISLAND	KERGUELEN / KERGUELEN ARCHIPELAGO / SHIELD STAGE	LAC MICHELE, LORANCHET PENINSULA	-49	-49	69	69	SAE			s_TC 06 125 [20779]	HARZBURGITE, SPINEL, XENOLITH [20779]									PER					WR [20779]	43.1519	0.0161451		0.755545	0.479852			7.57165	0.520704	46.6148	0.114864			0.0274908
[7059]	OCEAN ISLAND	KERGUELEN / KERGUELEN ARCHIPELAGO	LORANCHET PENINSULA, LAC MICHELE	-48.87	-48.87	68.96	68.96	SAE			s_BY-96-381 [7059]	HARZBURGITE, XENOLITH [7059]								PROTOGRANULAR-POIKILOBLASTIC [7059]	PER					WR [7059]
[7059]	OCEAN ISLAND	KERGUELEN / KERGUELEN ARCHIPELAGO	LORANCHET PENINSULA, LAC MICHELE	-48.87	-48.87	68.96	68.96	SAE			s_BY-96-357 [7059]	HARZBURGITE, XENOLITH [7059]								PROTOGRANULAR-POIKILOBLASTIC [7059]	PER					WR [7059]
[7059]	OCEAN ISLAND	KERGUELEN / KERGUELEN ARCHIPELAGO	RONARC^H PENINSULA, TRIEDRE	-48.55	-49.75	68.5	70.58	SAE			s_GM-92-453 [7059]	HARZBURGITE, XENOLITH [7059]								POIKILITIC [7059]	PER					WR [7059]
[7059]	OCEAN ISLAND	KERGUELEN / KERGUELEN ARCHIPELAGO	VALLEE RING	-48.55	-49.75	68.5	70.58	SAE			s_MM-94-54 [7059]	DUNITE, XENOLITH [7059]								EQUIGRANULAR [7059]	PER					WR [7059]
[7059]	OCEAN ISLAND	KERGUELEN / KERGUELEN ARCHIPELAGO	LORANCHET PENINSULA, POINTE ESPERANCE	-48.87	-48.87	68.96	68.96	SAE			s_GM-92-214 [7059]	DUNITE, XENOLITH [7059]								EQUIGRANULAR [7059]	PER					WR [7059]
[1452][1002]	OCEAN ISLAND	KERGUELEN / KERGUELEN ARCHIPELAGO	PRINCE DE GALLES PENINSULA, POINTE SUZANNE	-48.55	-49.75	68.5	70.58	SAE			s_92-502 [1452] / s_GM-92-502 [1002]	HARZBURGITE, XENOLITH [1452]								POIKILITIC [1452] / COARSE-GRAINED [1002]	PER					WR [1452]
[1452][1002]	OCEAN ISLAND	KERGUELEN / KERGUELEN ARCHIPELAGO	PRINCE DE GALLES PENINSULA, POINTE SUZANNE	-48.55	-49.75	68.5	70.58	SAE			s_92-509 [1452] / s_GM-92-509 [1002]	HARZBURGITE, XENOLITH [1452]								POIKILITIC [1452] / COARSE-GRAINED [1002]	PER					WR [1452]
[1452][1002]	OCEAN ISLAND	KERGUELEN / KERGUELEN ARCHIPELAGO / MOUNT TIZZARD	JEANNE D^ARC PENINSULA	-48.55	-49.75	68.5	70.58	SAE			s_91-114 [1452] / s_MG-91-114 [1002]	DUNITE, XENOLITH [1452]								COARSE-GRAINED [1002]	PER					WR [1452]
[1016]	OCEAN ISLAND	KERGUELEN / KERGUELEN ARCHIPELAGO		-48.55	-49.75	68.5	70.58	SAE			s_DR4 [1016]	HARZBURGITE, XENOLITH [1016]								PROTOGRANULAR [1016]	PER					WR [1016]	43.74	0.02		0.7				7.18	0.73	44.51	0.14		0.01	0.17	0.02
[59]	OCEAN ISLAND	KERGUELEN / KERGUELEN ARCHIPELAGO	PORT JEANNE D^ARC	-48.55	-49.75	68.5	70.58	SAE			s_HC93336 [59]	DUNITE, XENOLITH [59]									PER				HE3_HE4(R/R(A)) from OLIVINE [59]	MIN [59]
[59]	OCEAN ISLAND	KERGUELEN / KERGUELEN ARCHIPELAGO	CHRISTMAS HARBOUR	-48.55	-49.75	68.5	70.58	SAE			s_BM66399 [59]	HARZBURGITE, XENOLITH [59]									PER				HE3_HE4(R/R(A)) from OLIVINE [59]	MIN [59]
[1011]	OCEAN ISLAND	KERGUELEN / KERGUELEN ARCHIPELAGO	LAC SUPERIEUR	-48.55	-49.75	68.5	70.58	SAE			s_OB93-52 [1011]	LHERZOLITE, SPINEL, XENOLITH [1011]									PER					WR [1011]
[1011]	OCEAN ISLAND	KERGUELEN / KERGUELEN ARCHIPELAGO	LAC SUPERIEUR	-48.55	-49.75	68.5	70.58	SAE			s_OB93-64 [1011]	DUNITE, XENOLITH [1011]									PER					WR [1011]
[1011]	OCEAN ISLAND	KERGUELEN / KERGUELEN ARCHIPELAGO	LAC SUPERIEUR	-48.55	-49.75	68.5	70.58	SAE			s_OB93-77 [1011]	HARZBURGITE, SPINEL, XENOLITH [1011]									PER					WR [1011]
[1011]	OCEAN ISLAND	KERGUELEN / KERGUELEN ARCHIPELAGO	LAC SUPERIEUR	-48.55	-49.75	68.5	70.58	SAE			s_OB93-78 [1011]	HARZBURGITE, SPINEL, XENOLITH [1011]									PER					WR [1011]
[1011]	OCEAN ISLAND	KERGUELEN / KERGUELEN ARCHIPELAGO	LAC SUPERIEUR	-48.55	-49.75	68.5	70.58	SAE			s_OB93-80 [1011]	HARZBURGITE, SPINEL, XENOLITH [1011]									PER					WR [1011]
[1011]	OCEAN ISLAND	KERGUELEN / KERGUELEN ARCHIPELAGO	LAC SUPERIEUR	-48.55	-49.75	68.5	70.58	SAE			s_OB93-82 [1011]	DUNITE, XENOLITH [1011]									PER					WR [1011]
[1011]	OCEAN ISLAND	KERGUELEN / KERGUELEN ARCHIPELAGO	MONT TRAPEZE	-48.55	-49.75	68.5	70.58	SAE			s_OB93-280 [1011]	HARZBURGITE, SPINEL, XENOLITH [1011]									PER					WR [1011]
[1011]	OCEAN ISLAND	KERGUELEN / KERGUELEN ARCHIPELAGO	MONT TRAPEZE	-48.55	-49.75	68.5	70.58	SAE			s_OB93-284 [1011]	HARZBURGITE, SPINEL, XENOLITH [1011]									PER					WR [1011]
[1011]	OCEAN ISLAND	KERGUELEN / KERGUELEN ARCHIPELAGO	MONT TRAPEZE	-48.55	-49.75	68.5	70.58	SAE			s_OB93-284B [1011]	HARZBURGITE, SPINEL, XENOLITH [1011]									PER					WR [1011]
[1011]	OCEAN ISLAND	KERGUELEN / KERGUELEN ARCHIPELAGO	MONT TRAPEZE	-48.55	-49.75	68.5	70.58	SAE			s_OB93-287 [1011]	HARZBURGITE, SPINEL, XENOLITH [1011]									PER					WR [1011]
[1011]	OCEAN ISLAND	KERGUELEN / KERGUELEN ARCHIPELAGO	MONT TRAPEZE	-48.55	-49.75	68.5	70.58	SAE			s_OB93-289 [1011]	HARZBURGITE, SPINEL, XENOLITH [1011]									PER					WR [1011]
[1011]	OCEAN ISLAND	KERGUELEN / KERGUELEN ARCHIPELAGO	MONT TRAPEZE	-48.55	-49.75	68.5	70.58	SAE			s_OB93-291 [1011]	HARZBURGITE, SPINEL, XENOLITH [1011]									PER					WR [1011]
[1011]	OCEAN ISLAND	KERGUELEN / KERGUELEN ARCHIPELAGO	MONT TRAPEZE	-48.55	-49.75	68.5	70.58	SAE			s_OB93-297 [1011]	HARZBURGITE, SPINEL, XENOLITH [1011]									PER					WR [1011]
[1011]	OCEAN ISLAND	KERGUELEN / KERGUELEN ARCHIPELAGO	MONT TRAPEZE	-48.55	-49.75	68.5	70.58	SAE			s_OB93-305 [1011]	HARZBURGITE, SPINEL, XENOLITH [1011]									PER					WR [1011]
[1011]	OCEAN ISLAND	KERGUELEN / KERGUELEN ARCHIPELAGO	MONT TRAPEZE	-48.55	-49.75	68.5	70.58	SAE			s_OB93-305R [1011]	HARZBURGITE, SPINEL, XENOLITH [1011]									PER					WR [1011]
[1011]	OCEAN ISLAND	KERGUELEN / KERGUELEN ARCHIPELAGO	MONT TRAPEZE	-48.55	-49.75	68.5	70.58	SAE			s_OB93-306 [1011]	HARZBURGITE, SPINEL, XENOLITH [1011]									PER					WR [1011]
[1011]	OCEAN ISLAND	KERGUELEN / KERGUELEN ARCHIPELAGO	MONT TRAPEZE	-48.55	-49.75	68.5	70.58	SAE			s_OB93-307 [1011]	HARZBURGITE, SPINEL, XENOLITH [1011]									PER					WR [1011]
[1011]	OCEAN ISLAND	KERGUELEN / KERGUELEN ARCHIPELAGO	MONT TRAPEZE	-48.55	-49.75	68.5	70.58	SAE			s_OB93-314 [1011]	HARZBURGITE, SPINEL, XENOLITH [1011]									PER					WR [1011]
[1011]	OCEAN ISLAND	KERGUELEN / KERGUELEN ARCHIPELAGO	MONT TRAPEZE	-48.55	-49.75	68.5	70.58	SAE			s_OB93-317 [1011]	HARZBURGITE, SPINEL, XENOLITH [1011]									PER					WR [1011]
[7059]	OCEAN ISLAND	KERGUELEN / KERGUELEN ARCHIPELAGO	LORANCHET PENINSULA, LAC MICHELE	-48.87	-48.87	68.96	68.96	SAE			s_OB-96-396 [7059]	HARZBURGITE, XENOLITH [7059]								POIKILOBLASTIC [7059]	PER					WR [7059]
[7059]	OCEAN ISLAND	KERGUELEN / KERGUELEN ARCHIPELAGO	LORANCHET PENINSULA, LAC MICHELE	-48.87	-48.87	68.96	68.96	SAE			s_OB-96-394 [7059]	HARZBURGITE, XENOLITH [7059]								POIKILOBLASTIC [7059]	PER					WR [7059]
[7059]	OCEAN ISLAND	KERGUELEN / KERGUELEN ARCHIPELAGO	LORANCHET PENINSULA, POINTE ESPERANCE	-48.87	-48.87	68.96	68.96	SAE			s_GM-92-209 [7059]	DUNITE, XENOLITH [7059]								EQUIGRANULAR [7059]	PER					WR [7059]
[7247]	OCEAN ISLAND	KERGUELEN / KERGUELEN ARCHIPELAGO	RONARC^H PENINSULA, VALLEY PHONOLITE	-48.55	-49.75	68.5	70.58	SAE			s_MG91-140 [7247]	DUNITE, XENOLITH [7247]									PER					WR [7247]	39.76	0.03		0.55			10.3		0.47	46.61	0.14		0.01	0.17	0.01		0.62	0.11		0.44
[1002]	OCEAN ISLAND	KERGUELEN / KERGUELEN ARCHIPELAGO	JEANNE D^ARC PENINSULA, DOME ROUGE	-48.55	-49.75	68.5	70.58	SAE			s_MG-91-38 [1002]	HARZBURGITE, XENOLITH [1002]								COARSE-GRAINED [1002]	PER					WR [1002]
[1002]	OCEAN ISLAND	KERGUELEN / KERGUELEN ARCHIPELAGO	JEANNE D^ARC PENINSULA, DOME ROUGE	-48.55	-49.75	68.5	70.58	SAE			s_MG-91-42 [1002]	HARZBURGITE, XENOLITH [1002]								COARSE-GRAINED [1002]	PER					WR [1002]
[1002]	OCEAN ISLAND	KERGUELEN / KERGUELEN ARCHIPELAGO / MOUNT TIZZARD	JEANNE D^ARC PENINSULA	-48.55	-49.75	68.5	70.58	SAE			s_MG-91-40 [1002]	DUNITE, XENOLITH [1002]								COARSE-GRAINED [1002]	PER					WR [1002]
[1002]	OCEAN ISLAND	KERGUELEN / KERGUELEN ARCHIPELAGO / MOUNT TIZZARD	JEANNE D^ARC PENINSULA	-48.55	-49.75	68.5	70.58	SAE			s_MG-91-105 [1002]	WEHRLITE, XENOLITH [1002]								HETEROGRANULAR GRANOBLASTIC-MOSAIC [1002]	PER					WR [1002]
[1002]	OCEAN ISLAND	KERGUELEN / KERGUELEN ARCHIPELAGO / MOUNT TIZZARD	JEANNE D^ARC PENINSULA	-48.55	-49.75	68.5	70.58	SAE			s_GM-92-252 [1002]	WEBSTERITE, OLIVINE-PLAGIOCLASE, XENOLITH [1002]								HETEROGRANULAR GRANOBLASTIC-MOSAIC [1002]	PER					WR [1002]
[1452]	OCEAN ISLAND	KERGUELEN / KERGUELEN ARCHIPELAGO / MOUNT TIZZARD	JEANNE D^ARC PENINSULA	-48.55	-49.75	68.5	70.58	SAE			s_92-372 [1452]	LHERZOLITE, XENOLITH [1452]								EQUIGRANULAR [1452]	PER					WR [1452]
[1452]	OCEAN ISLAND	KERGUELEN / KERGUELEN ARCHIPELAGO / MOUNT TIZZARD	JEANNE D^ARC PENINSULA	-48.55	-49.75	68.5	70.58	SAE			s_92-426 [1452]	DUNITE, XENOLITH [1452]									PER					WR [1452]
[1452]	OCEAN ISLAND	KERGUELEN / KERGUELEN ARCHIPELAGO	RONARC^H PENINSULA, LE TRIEDRE	-48.55	-49.75	68.5	70.58	SAE			s_92-491 [1452]	DUNITE, XENOLITH [1452]									PER					WR [1452]
[1452]	OCEAN ISLAND	KERGUELEN / KERGUELEN ARCHIPELAGO	PRINCE DE GALLES PENINSULA, POINTE SUZANNE	-48.55	-49.75	68.5	70.58	SAE			s_91-505RT [1452]	DUNITE, XENOLITH [1452]									PER					WR [1452]
[1452]	OCEAN ISLAND	KERGUELEN / KERGUELEN ARCHIPELAGO	JEANNE D^ARC PENINSULA, DOME ROUGE	-48.55	-49.75	68.5	70.58	SAE			s_91-38 [1452]	HARZBURGITE, XENOLITH [1452]								PROTOGRANULAR [1452]	PER					WR [1452]
[1452]	OCEAN ISLAND	KERGUELEN / KERGUELEN ARCHIPELAGO	JEANNE D^ARC PENINSULA, DOME ROUGE	-48.55	-49.75	68.5	70.58	SAE			s_91-42 [1452]	HARZBURGITE, XENOLITH [1452]								PROTOGRANULAR [1452]	PER					WR [1452]
[1452]	OCEAN ISLAND	KERGUELEN / KERGUELEN ARCHIPELAGO	JEANNE D^ARC PENINSULA, DOME ROUGE	-48.55	-49.75	68.5	70.58	SAE			s_91-8 [1452]	HARZBURGITE, XENOLITH [1452]								POIKILITIC [1452]	PER					WR [1452]
[1452]	OCEAN ISLAND	KERGUELEN / KERGUELEN ARCHIPELAGO	JEANNE D^ARC PENINSULA, DOME ROUGE	-48.55	-49.75	68.5	70.58	SAE			s_133A1-1 [1452]	HARZBURGITE, XENOLITH [1452]								POIKILITIC [1452]	PER					WR [1452]
[1016]	OCEAN ISLAND	KERGUELEN / KERGUELEN ARCHIPELAGO		-48.55	-49.75	68.5	70.58	SAE			s_MG38 [1016]	HARZBURGITE, XENOLITH [1016]								PROTOGRANULAR [1016]	PER					WR [1016]	45.18	0.01		0.87				7.38	1.06	43.71	0.12				0.01
[1016]	OCEAN ISLAND	KERGUELEN / KERGUELEN ARCHIPELAGO		-48.55	-49.75	68.5	70.58	SAE			s_MG216 [1016]	HARZBURGITE, XENOLITH [1016]								POIKILITIC [1016]	PER					WR [1016]	43.87	0.09		1.14				7.95	1.1	43.4	0.14		0.03	0.27	0.02
[1016]	OCEAN ISLAND	KERGUELEN / KERGUELEN ARCHIPELAGO		-48.55	-49.75	68.5	70.58	SAE			s_GM512 [1016]	HARZBURGITE, XENOLITH [1016]								POIKILITIC [1016]	PER					WR [1016]	42.43	0.07		0.8				7.79	0.56	46.06	0.12		0.01	0.06	0.02
[1016]	OCEAN ISLAND	KERGUELEN / KERGUELEN ARCHIPELAGO		-48.55	-49.75	68.5	70.58	SAE			s_MG114 [1016]	DUNITE, XENOLITH [1016]								COARSE-GRAINED [1016]	PER					WR [1016]	40.12	0.02		0.15				12.08	0.34	45.73	0.18
[1016]	OCEAN ISLAND	KERGUELEN / KERGUELEN ARCHIPELAGO		-48.55	-49.75	68.5	70.58	SAE			s_MG256 [1016]	DUNITE, XENOLITH [1016]								COARSE-GRAINED [1016]	PER					WR [1016]	38.42	0.07		1.28				12.04	0.27	44.35	0.19		0.01		0.03
[48]	OCEAN ISLAND	KERGUELEN / KERGUELEN ARCHIPELAGO	PLATEAU CENTRAL	-48.55	-49.75	68.5	70.58	SAE			s_1334-2-1 [48]	HARZBURGITE, XENOLITH [48]									PER					WR [48]
[48]	OCEAN ISLAND	KERGUELEN / KERGUELEN ARCHIPELAGO	PLATEAU CENTRAL	-48.55	-49.75	68.5	70.58	SAE			s_1334-2-2 [48]	DUNITE, XENOLITH [48]									PER					WR [48]
[48]	OCEAN ISLAND	KERGUELEN / KERGUELEN ARCHIPELAGO	PLATEAU CENTRAL	-48.55	-49.75	68.5	70.58	SAE			s_133-1-3 [48]	HARZBURGITE, PHLOGOPITE, XENOLITH [48]									PER					WR [48]
[979]	OCEAN ISLAND	KERGUELEN / KERGUELEN ARCHIPELAGO		-48.55	-49.75	68.5	70.58	SAE			s_GM372 [979]	LHERZOLITE, CLINOPYROXENE, XENOLITH [979]									PER					WR [979]	41.02	0.05		6.33				7.9	3.43	39.47	0.13		0	0.22	0.01
[979]	OCEAN ISLAND	KERGUELEN / KERGUELEN ARCHIPELAGO		-48.55	-49.75	68.5	70.58	SAE			s_MG109 [979]	LHERZOLITE, CLINOPYROXENE, XENOLITH [979]									PER					WR [979]	41.44	0.2		6.75				11.05	4.45	33.66	0.18		0	0.25	0.03
[979]	OCEAN ISLAND	KERGUELEN / KERGUELEN ARCHIPELAGO		-48.55	-49.75	68.5	70.58	SAE			s_MG105 [979]	WEHRLITE, XENOLITH [979]									PER					WR [979]	39.84	0.12		2.98				16.16	2.71	36.56	0.23		0	0	0.03
[979]	OCEAN ISLAND	KERGUELEN / KERGUELEN ARCHIPELAGO		-48.55	-49.75	68.5	70.58	SAE			s_GM211 [979]	WEBSTERITE, OLIVINE, XENOLITH [979]									PER					WR [979]	43.17	0.23		7.66				8.14	8.95	28.44	0.13		0.02	0.43	0.01
[979]	OCEAN ISLAND	KERGUELEN / KERGUELEN ARCHIPELAGO		-48.55	-49.75	68.5	70.58	SAE			s_GM234 [979]	WEBSTERITE, OLIVINE, XENOLITH [979]									PER					WR [979]	42.3	0.08		6.74				9.64	7.51	31.61	0.15		0	0.35	0.01
[979]	OCEAN ISLAND	KERGUELEN / KERGUELEN ARCHIPELAGO		-48.55	-49.75	68.5	70.58	SAE			s_MG1 [979]	WEBSTERITE, OLIVINE-PLAGIOCLASE, XENOLITH [979]									PER					WR [979]	42.81	0.16		11.53				9.71	9.72	21.79	0.16		0	0.9	0.01
[979]	OCEAN ISLAND	KERGUELEN / KERGUELEN ARCHIPELAGO		-48.55	-49.75	68.5	70.58	SAE			s_MG13 [979]	WEBSTERITE, OLIVINE-PLAGIOCLASE, XENOLITH [979]									PER					WR [979]	46.55	0.26		9.58				8.16	12.94	19.08	0.15		0	0.53	0.01
[979]	OCEAN ISLAND	KERGUELEN / KERGUELEN ARCHIPELAGO		-48.55	-49.75	68.5	70.58	SAE			s_GM408 [979]	WEBSTERITE, OLIVINE-PLAGIOCLASE, XENOLITH [979]									PER					WR [979]	41.48	0.22		7.39				11.36	5.06	31.59	0.17		0.02	0.49	0.02
[979]	OCEAN ISLAND	KERGUELEN / KERGUELEN ARCHIPELAGO		-48.55	-49.75	68.5	70.58	SAE			s_MG3 [979]	CLINOPYROXENITE, XENOLITH [979]									PER					WR [979]	39.69	1.27		15.65				11.74	13.69	13.34	0.17		0.07	0.94	0.01
[979]	OCEAN ISLAND	KERGUELEN / KERGUELEN ARCHIPELAGO		-48.55	-49.75	68.5	70.58	SAE			s_MG14 [979]	CLINOPYROXENITE, XENOLITH [979]									PER					WR [979]	45.28	1.35		11.2				9.79	14.37	14.1	0.19		0.14	0.7	0.04
[979]	OCEAN ISLAND	KERGUELEN / KERGUELEN ARCHIPELAGO		-48.55	-49.75	68.5	70.58	SAE			s_MG147.2 [979]	CLINOPYROXENITE, GARNET, XENOLITH [979]									PER					WR [979]	41.32	1.73		14.15				11.27	15.34	12.91	0.18		0.04	0.72	0.01
[979]	OCEAN ISLAND	KERGUELEN / KERGUELEN ARCHIPELAGO		-48.55	-49.75	68.5	70.58	SAE			s_MG148 [979]	CLINOPYROXENITE, GARNET, XENOLITH [979]									PER					WR [979]	35.94	7.82		12.82				14.88	12.69	12.35	0.19		0.03	0.61	0.02
[1814][2030][7059]	OCEAN ISLAND	KERGUELEN / KERGUELEN ARCHIPELAGO	COURBET PENINSULA, MONT DU CHATEAU	-48.55	-49.75	68.5	70.58	SAE			s_OB-93-3 [1814]	HARZBURGITE, XENOLITH [1814]								POIKILITIC [1814]	PER					WR [1814]	44.51	0.04		1.4				7.65	0.85	44.15	0.12		0.05	0.16	0.03		0.45	0.13		0.06
[1814][2030]	OCEAN ISLAND	KERGUELEN / KERGUELEN ARCHIPELAGO	COURBET PENINSULA, MONT DU CHATEAU	-48.55	-49.75	68.5	70.58	SAE			s_OB-93-5 [1814]	HARZBURGITE, XENOLITH [1814]								POIKILITIC [1814]	PER					WR [1814]	43.42	0.08		1.24				7.45	0.8	44.21	0.11		0.09	0.15	0.05		1.1	0.25		0.1
[2030][7059]	OCEAN ISLAND	KERGUELEN / KERGUELEN ARCHIPELAGO	COURBET PENINSULA, VAL STUDER	-48.55	-49.75	68.5	70.58	SAE			s_OB-93-58 [2030] / s_OB-93-58(OB-98-58) [7059]	HARZBURGITE, XENOLITH [2030]								PROTOGRANULAR [2030]	PER					WR [2030]	43.25			0.5				7.4	0.65	46.05	0.09			0.07			0.65	0.09		0.2
[2030][7059]	OCEAN ISLAND	KERGUELEN / KERGUELEN ARCHIPELAGO	JEANNE D^ARC PENINSULA, DOME ROUGE	-48.55	-49.75	68.5	70.58	SAE			s_OB-93-426 [2030]	HARZBURGITE, XENOLITH [2030]								PROTOGRANULAR [2030]	PER					WR [2030]	44.9	0.01		0.8				7.2	0.75	44.8	0.12		0.01	0.1			0.95	0.13		0.1
[2030]	OCEAN ISLAND	KERGUELEN / KERGUELEN ARCHIPELAGO	PRINCE DE GALLES PENINSULA, POINTE SUZANNE	-48.55	-49.75	68.5	70.58	SAE			s_GM-92-501 [2030]	HARZBURGITE, XENOLITH [2030]								POIKILITIC [2030]	PER					WR [2030]	44.65	0.17		1.5				7.8	0.95	43.4	0.11		0.07	0.25	0.04		0.65	0.22		0.05
[2030][7059]	OCEAN ISLAND	KERGUELEN / KERGUELEN ARCHIPELAGO	PLATEAU CENTRAL, CAPITOLE	-48.55	-49.75	68.5	70.58	SAE			s_BOB-93-640.1 [2030]	DUNITE, XENOLITH [2030]								EQUIGRANULAR [7059]	PER					WR [2030]	38.75	0.05		0.7				12.15	0.5	42.6	0.16		0.01	0.15	0.01		1.75	0.25		2.25
[2030][7059]	OCEAN ISLAND	KERGUELEN / KERGUELEN ARCHIPELAGO	VALLEE RING	-48.55	-49.75	68.5	70.58	SAE			s_MM-94-101 [2030]	DUNITE, XENOLITH [2030]								EQUIGRANULAR [7059]	PER					WR [2030]	39.75	0.05		0.45				11.9	0.4	45.5	0.13		0.02	0.2	0.01		0.65	0.15		0.85
[1814]	OCEAN ISLAND	KERGUELEN / KERGUELEN ARCHIPELAGO	COURBET PENINSULA, MONT DU CHATEAU	-48.55	-49.75	68.5	70.58	SAE			s_OB-94-8 [1814]	HARZBURGITE, XENOLITH [1814]								POIKILITIC [1814]	PER					WR [1814]	44.41	0.01		1.3				7.4	0.71	44.14	0.1		0.03	0.11	0
[1814]	OCEAN ISLAND	KERGUELEN / KERGUELEN ARCHIPELAGO		-48.55	-49.75	68.5	70.58	SAE			s_OB-92-501 [1814]	HARZBURGITE, XENOLITH [1814]								POIKILITIC [1814]	PER					WR [1814]	44.65	0.17		1.5				7.79	0.94	43.4	0.11		0.07	0.24	0.04
[2030]	OCEAN ISLAND	KERGUELEN / KERGUELEN ARCHIPELAGO / MONT TRAPEZE	COURBET PENINSULA	-49.3	-49.3	70.06	70.06	SAE			s_OB-93-279 [2030]	HARZBURGITE, XENOLITH [2030]								PROTOGRANULAR [2030]	PER					WR [2030]	43.85			0.9				7.45	0.7	44.4	0.12			0.05			1.6	0.2		0.09
[2030]	OCEAN ISLAND	KERGUELEN / KERGUELEN ARCHIPELAGO	COURBET PENINSULA, MONT DU CHATEAU	-48.55	-49.75	68.5	70.58	SAE			s_OB-93-22 [2030]	HARZBURGITE, XENOLITH [2030]								POIKILITIC [2030]	PER					WR [2030]	44.55	0.01		1.05				8.15	0.7	43.9	0.1		0.01	0.15			0.95	0.21		0.13
[2030]	OCEAN ISLAND	KERGUELEN / KERGUELEN ARCHIPELAGO	COURBET PENINSULA, RAVIN DU MICA	-48.55	-49.75	68.5	70.58	SAE			s_JGM-92-1C [2030]	LHERZOLITE, XENOLITH [2030]								POIKILITIC [2030]	PER					WR [2030]	42.4	0.16		1.2				10.4	1.3	42.8	0.13		0.02	0.25	0.03		0.4	0.02		0.09
[2030]	OCEAN ISLAND	KERGUELEN / KERGUELEN ARCHIPELAGO	RONARC^H PENINSULA, TRIEDRE	-48.55	-49.75	68.5	70.58	SAE			s_GM-92-480 [2030]	DUNITE, XENOLITH [2030]									PER					WR [2030]	39.6	0.04		0.8				11.95	0.35	45.15	0.15		0.01	0.2	0.02		0.6	0.23		0.07
[11266]	OCEAN ISLAND	KERGUELEN / KERGUELEN ARCHIPELAGO	VAL GABBRO	-49.7	-49.7	70.1	70.1	SAE			s_82247 [11266]	NOT GIVEN [11266]									PER					WR [11266]	43.32	0.72		6.69		1.29	13.76		9.08	21.91	0.22		0.26	0.7	0.08	1.03
[1002]	OCEAN ISLAND	KERGUELEN / KERGUELEN ARCHIPELAGO	JEANNE D^ARC PENINSULA, DOME ROUGE	-48.55	-49.75	68.5	70.58	SAE			s_MG-91-38ACIDDISSOLUTION [1002]	HARZBURGITE, XENOLITH [1002]								COARSE-GRAINED [1002]	PER					WR [1002]
[1002]	OCEAN ISLAND	KERGUELEN / KERGUELEN ARCHIPELAGO	JEANNE D^ARC PENINSULA, DOME ROUGE	-48.55	-49.75	68.5	70.58	SAE			s_MG-91-38ALKALINEDISSOLUTION [1002]	HARZBURGITE, XENOLITH [1002]								COARSE-GRAINED [1002]	PER					WR [1002]
[1002]	OCEAN ISLAND	KERGUELEN / KERGUELEN ARCHIPELAGO / MOUNT TIZZARD	JEANNE D^ARC PENINSULA	-48.55	-49.75	68.5	70.58	SAE			s_MG-91-105ACIDDISSOLUTION [1002]	WEHRLITE, XENOLITH [1002]								HETEROGRANULAR GRANOBLASTIC-MOSAIC [1002]	PER					WR [1002]
[1002]	OCEAN ISLAND	KERGUELEN / KERGUELEN ARCHIPELAGO / MOUNT TIZZARD	JEANNE D^ARC PENINSULA	-48.55	-49.75	68.5	70.58	SAE			s_MG-91-105ALKALINEDISSOLUTION [1002]	WEHRLITE, XENOLITH [1002]								HETEROGRANULAR GRANOBLASTIC-MOSAIC [1002]	PER					WR [1002]
[1452]	OCEAN ISLAND	KERGUELEN / KERGUELEN ARCHIPELAGO / MOUNT TIZZARD	JEANNE D^ARC PENINSULA	-48.55	-49.75	68.5	70.58	SAE			s_92-426 [1452]	DUNITE, XENOLITH [1452]									PER					WR [1452]
[1452]	OCEAN ISLAND	KERGUELEN / KERGUELEN ARCHIPELAGO	JEANNE D^ARC PENINSULA, DOME ROUGE	-48.55	-49.75	68.5	70.58	SAE			s_91-38 [1452]	HARZBURGITE, XENOLITH [1452]								PROTOGRANULAR [1452]	PER					WR [1452]
[1452]	OCEAN ISLAND	KERGUELEN / KERGUELEN ARCHIPELAGO	JEANNE D^ARC PENINSULA, DOME ROUGE	-48.55	-49.75	68.5	70.58	SAE			s_91-42 [1452]	HARZBURGITE, XENOLITH [1452]								PROTOGRANULAR [1452]	PER					WR [1452]
[1452]	OCEAN ISLAND	KERGUELEN / KERGUELEN ARCHIPELAGO	JEANNE D^ARC PENINSULA, DOME ROUGE	-48.55	-49.75	68.5	70.58	SAE			s_91-8 [1452]	HARZBURGITE, XENOLITH [1452]								POIKILITIC [1452]	PER					WR [1452]
[1452]	OCEAN ISLAND	KERGUELEN / KERGUELEN ARCHIPELAGO	JEANNE D^ARC PENINSULA, DOME ROUGE	-48.55	-49.75	68.5	70.58	SAE			s_133A1-1 [1452]	HARZBURGITE, XENOLITH [1452]								POIKILITIC [1452]	PER					WR [1452]
[4585]	OCEAN ISLAND	KERGUELEN / KERGUELEN ARCHIPELAGO	RONARC^H PENINSULA, VALLEY PHONOLITE	-48.55	-49.75	68.5	70.58	SAE			s_M144 [4585]	DUNITE, XENOLITH [4585]									PER					WR [4585]	40.98	4.39		12.36				7.1	11.01	15.82	0.11		1.23	3.06	0.08		1.07
[4585]	OCEAN ISLAND	KERGUELEN / KERGUELEN ARCHIPELAGO	RONARC^H PENINSULA, VALLEY PHONOLITE	-48.55	-49.75	68.5	70.58	SAE			s_29 [4585]	DUNITE, XENOLITH [4585]									PER					WR [4585]	42.5	4.16		9.62		10.36			13.28	12.71	0.1		3.31	1.17	0.06		0.97
[4585]	OCEAN ISLAND	KERGUELEN / KERGUELEN ARCHIPELAGO	RONARC^H PENINSULA, VALLEY PHONOLITE	-48.55	-49.75	68.5	70.58	SAE			s_145 [4585]	DUNITE, XENOLITH [4585]									PER					WR [4585]	38.64	3.67		12.12		4.26	6.73		13.19	6.46	0.18		3.6	3.29	1.14		3.11	0.26		3.72
[4585]	OCEAN ISLAND	KERGUELEN / KERGUELEN ARCHIPELAGO	RONARC^H PENINSULA, VALLEY PHONOLITE	-48.55	-49.75	68.5	70.58	SAE			s_640N [4585]	DUNITE, XENOLITH [4585]									PER					WR [4585]	42.83	2.75		11.9		3.57	8.7		10.76	11.03	0.16		1.55	2.48	0.39		1.2	0.33		2.8
[4585]	OCEAN ISLAND	KERGUELEN / KERGUELEN ARCHIPELAGO	RONARC^H PENINSULA, VALLEY PHONOLITE	-48.55	-49.75	68.5	70.58	SAE			s_ENC2 [4585]	DUNITE, XENOLITH [4585]									PER					WR [4585]	51.26	0.97		18.71		3.15	1.7		4.65	2.07	0.16		4.93	4.29	0.41		5.94	2.44		0.23
[4585]	OCEAN ISLAND	KERGUELEN / KERGUELEN ARCHIPELAGO	RONARC^H PENINSULA, VALLEY PHONOLITE	-48.55	-49.75	68.5	70.58	SAE			s_ENC3 [4585]	DUNITE, XENOLITH [4585]									PER					WR [4585]	49.63	1.23		17.46		3.68	1.94		4.71	3.57	0.17		4.96	3.76	0.48		5.87	3.42		0.26
[4585]	OCEAN ISLAND	KERGUELEN / KERGUELEN ARCHIPELAGO	RONARC^H PENINSULA, VALLEY PHONOLITE	-48.55	-49.75	68.5	70.58	SAE			s_ENC4 [4585]	DUNITE, XENOLITH [4585]									PER					WR [4585]	43.84	3.58		14.24		4.65	6.63		7.95	6.73	0.2		3.92	3.09	1.03		3.07	1.51		0.12
[4585]	OCEAN ISLAND	KERGUELEN / KERGUELEN ARCHIPELAGO	RONARC^H PENINSULA, VALLEY PHONOLITE	-48.55	-49.75	68.5	70.58	SAE			s_60 [4585]	DUNITE, XENOLITH [4585]									PER					WR [4585]	38.64	3.73		9.38		3.78	6.34		8.22	12.28	0.14		0.51	4.72	0.97		3.21	0.85		7.18
[4585]	OCEAN ISLAND	KERGUELEN / KERGUELEN ARCHIPELAGO	RONARC^H PENINSULA, VALLEY PHONOLITE	-48.55	-49.75	68.5	70.58	SAE			s_66 [4585]	DUNITE, XENOLITH [4585]									PER					WR [4585]	43.76	4.25		12.43		4.41	7.63		9.96	7.93	0.16		2.32	3.15	1.03		2.33	0.5		0.03
[4585]	OCEAN ISLAND	KERGUELEN / KERGUELEN ARCHIPELAGO	RONARC^H PENINSULA, VALLEY PHONOLITE	-48.55	-49.75	68.5	70.58	SAE			s_68 [4585]	DUNITE, XENOLITH [4585]									PER					WR [4585]	40.17	3.28		9.72		4.08	6.91		8.42	11.75	0.15		0.59	5.02	1.03		3.35	0.79		4.06
[4585]	OCEAN ISLAND	KERGUELEN / KERGUELEN ARCHIPELAGO	RONARC^H PENINSULA, VALLEY PHONOLITE	-48.55	-49.75	68.5	70.58	SAE			s_135 [4585]	DUNITE, XENOLITH [4585]									PER					WR [4585]	44.47	3.56		14.01		4.31	6.93		7.97	6.62	0.18		4.03	4.4	1.02		1.9	0.44		0.06
[4585]	OCEAN ISLAND	KERGUELEN / KERGUELEN ARCHIPELAGO	RONARC^H PENINSULA, VALLEY PHONOLITE	-48.55	-49.75	68.5	70.58	SAE			s_680 [4585]	DUNITE, XENOLITH [4585]									PER					WR [4585]	38.7	3.11		10.91		3.44	8.35		11.56	11.25	0.17		1.95	3.04	1		2.45	0.4		3.19
[1002][1003]	OCEAN ISLAND	KERGUELEN / KERGUELEN ARCHIPELAGO	JEANNE D^ARC PENINSULA, DOME ROUGE	-48.55	-49.75	68.5	70.58	SAE			s_LVLK133A1-1 [1002]	LHERZOLITE, XENOLITH [1002] / HARZBURGITE, XENOLITH [1003]								COARSE-GRAINED [1002]	PER				HE3_HE4 from OLIVINE [1003], HE3_HE4(R/R(A)) from OLIVINE [1003]	WR [1002] / MIN [1003]
[4649]	OCEAN ISLAND	KERGUELEN / KERGUELEN ARCHIPELAGO	COURBET PENINSULA, VAL STUDER	-48.55	-49.75	68.5	70.58	SAE			s_OB-93-03 [4649]	HARZBURGITE, XENOLITH [4649]									PER					WR [4649]	44.67	0.08		1.19				7.74	0.86	44.92	0.13		0.11	0.12	0.04
[4649]	OCEAN ISLAND	KERGUELEN / KERGUELEN ARCHIPELAGO / MOUNT TIZZARD	JEANNE D^ARC PENINSULA	-48.55	-49.75	68.5	70.58	SAE			s_GM-92-266 [4649]	LHERZOLITE, XENOLITH [4649]									PER					WR [4649]	41.44	0.57		5.4				11.64	2.96	34.62	0.19		0.08	0.45	0.09
[4649]	OCEAN ISLAND	KERGUELEN / KERGUELEN ARCHIPELAGO	RONARC^H PENINSULA, VAL PHONOLITE	-48.55	-49.75	68.5	70.58	SAE	150	150	s_ARC83-08 [4649]	DUNITE, XENOLITH [4649]									PER					WR [4649]	42.5	4.16		9.62				9.32	13.28	12.71	0.1		3.31	1.17	0.05
[4681]	OCEAN ISLAND	KERGUELEN / KERGUELEN ARCHIPELAGO / MOUNT TIZZARD	JEANNE D^ARC PENINSULA	-48.55	-49.75	68.5	70.58	SAE			s_GM92-412 [4681]	GRANULITE, 2 PYROXENE [4681]								CUMULATE [4681]	MET					WR [4681]	44.9	0.06		25.66			3.96		13.16	10.31	0.05		0.08	1.45	0.02		0.37	0.15		0.07
[4681]	OCEAN ISLAND	KERGUELEN / KERGUELEN ARCHIPELAGO	COURBET PENINSULA, VAL STUDER	-48.55	-49.75	68.5	70.58	SAE			s_OB93-57 [4681]	GRANULITE, 2 PYROXENE [4681]								CUMULATE [4681]	MET					WR [4681]	49.3	0.35		16.95			5.81		14.48	10.33	0.1		0.05	1.85	0.02		0.62	0.12		0.13
[4681]	OCEAN ISLAND	KERGUELEN / KERGUELEN ARCHIPELAGO / MOUNT TIZZARD	JEANNE D^ARC PENINSULA	-48.55	-49.75	68.5	70.58	SAE			s_GM92-347 [4681]	GRANULITE, GARNET-2 PYROXENE [4681]								CUMULATE [4681]	MET					WR [4681]	44.8	0.04		23.35			5.25		11.85	13.3	0.07		0.07	1.06	0.02		0.57	0.16		0.03
[4681]	OCEAN ISLAND	KERGUELEN / KERGUELEN ARCHIPELAGO / MOUNT TIZZARD	JEANNE D^ARC PENINSULA	-48.55	-49.75	68.5	70.58	SAE			s_GM92-394 [4681]	GRANULITE, GARNET-2 PYROXENE [4681]								CUMULATE [4681]	MET					WR [4681]	49.1	0.83		16.8			6.71		11.57	11.1	0.12		0.16	2.69	0.04		1.31	0.31		0.05
[4681]	OCEAN ISLAND	KERGUELEN / KERGUELEN ARCHIPELAGO / MOUNT TIZZARD	JEANNE D^ARC PENINSULA	-48.55	-49.75	68.5	70.58	SAE			s_GM92-390 [4681]	GRANULITE, GARNET-2 PYROXENE [4681]									MET					WR [4681]	45.3	2.26		14.25			12.91		12.58	8.41	0.24		0.14	2.42	0.05		1.13	0.25		0.2
[1405]	OCEAN ISLAND	KERGUELEN / KERGUELEN ARCHIPELAGO	JEANNE D^ARC PENINSULA	-48.55	-49.75	68.5	70.58	SAE			s_MG91116 [1405]	GRANULITE [1405]									MET					WR [1405]	44.54	0.03		27.59				2.24	13.91	10.24	0.05			1.08	0.02
[1405]	OCEAN ISLAND	KERGUELEN / KERGUELEN ARCHIPELAGO	JEANNE D^ARC PENINSULA	-48.55	-49.75	68.5	70.58	SAE			s_MG9199A [1405]	GRANULITE [1405]									MET					WR [1405]	47.38	0.04		30.74				1.09	17.12	3.41	0.03		0.04	1.19	0.01
[502]	OCEAN ISLAND	KERGUELEN / KERGUELEN ARCHIPELAGO	MONTS BALLONS	-48.55	-49.75	68.5	70.58	SAE			s_78.34 [502]	AMPHIBOLITE [502]									MET					WR [502]
[502]	OCEAN ISLAND	KERGUELEN / KERGUELEN ARCHIPELAGO	MONTS BALLONS	-48.55	-49.75	68.5	70.58	SAE			s_78.69C [502]	AMPHIBOLITE [502]								CUMULATE [502]	MET					WR [502]
Abbreviations: MET: METAMORPHIC ROCK; PEG: PEGMATITE; PER: MANTLE XENOLITH; PLU: PLUTONIC ROCK; SED: SEDIMENTARY ROCK; VOL: VOLCANIC ROCK; VEIN: VEIN; ORE: ORE; WR: WHOLE ROCK; GL: VOLCANIC GLASS; MIN: MINERAL / COMPONENT (INCL. GROUNDMASS); INC: INCLUSION; LEACH: LEACH; SAE: SUBAERIAL; SAQ: SUBAQUATIC; F: FRESH; E: EXTENSIVELY ALTERED; M: MODERATELY ALTERED; S: SLIGHTLY ALTERED; T: ALMOST TOTALL…
References:
[48] TRULL T. W., NADEAU S., PINEAU F., POLVE M., JAVOY M.: C-HE SYSTEMATICS IN HOTSPOT XENOLITHS: IMPLICATIONS FOR MANTLE CARBON CONTENTS AND CARBON RECYCLING EARTH PLANET. SCI. LETT. 118 [1993] 43-64 doi: 10.1016/0012-821X(93)90158-6
[59] VANCE D., STONE J. O. H., O^NIONS R. K.: HE, SR AND ND ISOTOPES IN XENOLITHS FROM HAWAII AND OTHER OCEANIC ISLANDS EARTH PLANET. SCI. LETT. 96 [1989] 147-160 doi: 10.1016/0012-821X(89)90129-5
[94] WHITE W. M., HOFMANN A. W.: SR AND ND ISOTOPE GEOCHEMISTRY OF OCEANIC BASALTS AND MANTLE EVOLUTION NATURE 296 [1982] 821-825 doi: 10.1038/296821a0
[459] REISBERG L., ZINDLER A., MARCANTONIO F., WHITE W., WYMAN D. A., WEAVER B. L.: OS ISOTOPE SYSTEMATICS IN OCEAN ISLAND BASALTS EARTH PLANET. SCI. LETT. 120 [1993] 149-167 doi: 10.1016/0012-821X(93)90236-3
[473] BAKER P. E.: PERALKALINE ACID VOLCANIC ROCKS OF OCEANIC ISLANDS BULL. VOLCANOL. 38 [1975] 737-754 doi: 10.1007/BF02596906
[476] SALTERS V. J. M., WHITE W. M.: HF ISOTOPE CONSTRAINTS ON MANTLE EVOLUTION CHEM. GEOL. 145 [1998] 447-460 doi: 10.1016/S0009-2541(97)00154-X
[502] WEIS D., GIRET A.: KERGUELEN PLUTONIC COMPLEXES: SR, ND, PB ISOTOPIC STUDY ND INTERFERENCES ABOUT THEIR SOURCES, AGE, AND GEODYNAMIC SETTING MEM. SOC.GEOL. FRANCE 166 [1994] 47-59
[515] PATCHETT P. J.: HAFNIUM ISOTOPE RESULTS FROM MID-OCEAN RIDGES AND KERGUELEN LITHOS 16 [1983] 47-51 doi: 10.1016/0024-4937(83)90033-6
[549] GIRET A., BONIN B., LEGER J.-M.: AMPHIBOLE COMPOSITIONAL TRENDS IN OVERSATURATED AND UNDERSATURATED ALKALINE PLUTONIC RING COMPOSITION CAN. MINERAL. 18 [1980] 481-495
[847] WEIS D., FREY F. A., GIRET A., CANTAGREL J. M.: GEOCHEMICAL CHARACTERISTICS OF THE YOUNGEST VOLCANO (MOUNT ROSS) IN THE KERGUELEN ARCHIPELAGO: INFERENCES FOR MAGMA FLUX, LITHOSPHERE ASSIMILATION AND COMPOSITION OF THE KERGUELEN PLUME J. PETROL. 39 [1998] 973-994 doi: 10.1093/petroj/39.5.973
[973] YANG HUAI-JEN, FREY F. A., WEIS D., GIRET A., PYLE D. G., MICHON G.: PETROGENESIS OF THE FLOOD BASALTS FORMING THE NORTHERN KERGUELEN ARCHIPELAGO: IMPLICATIONS FOR THE KERGUELEN PLUME J. PETROL. 39 [1998] 711-748 doi: 10.1093/petroj/39.4.711
[979] GREGOIRE M., COTTIN J.-Y., GIRET A., MATTIELLI N., WEIS D.: THE META-IGNEOUS GRANULITE XENOLITHS FROM KERGUELEN ARCHIPELAGO: EVIDENCE OF A CONTINENT NUCLEATION IN AN OCEANIC SETTING CONTRIB. MINERAL. PETROL. 133 [1998] 259-283 doi: 10.1007/s004100050451
[986] CHEMINEE J.-L., NOUGIER J.: DISTRIBUTION OF URANIUM, THORIUM AND POTASSIUM IN THE VOLCANIC SUITES OF ILES KERGUELEN ADIE, R. J. | ANTARCTIC GEOLOGY AND GEOPHYSICS | UNIVERSITETSFORLAGET, OSLO [1972] 817-823
[988] GIRET A., LAMEYRE J.: A STUDY OF KERGUELEN PLUTONISM: PETROLOGY, GEOCHRONOLOGY AND GEOLOGICAL IMPLICATIONS OLIVER, R. L., JAMES, P. R., JAGO, J. B. | ANTARCTIC EARTH SCIENCES, 4TH INT. SYMP. | CAMBRIDGE UNIV. PRESS, CAMBRIDGE [1983] 646-651
[989] DOSSO L., MURTHY V. R.: A ND ISOTOPIC STUDY OF THE KERGUELEN ISLANDS: INFERENCES ON ENRICHED OCEANIC MANTLE SOURCES EARTH PLANET. SCI. LETT. 48 [1980] 268-276 doi: 10.1016/0012-821X(80)90190-9
[990] DOSSO L., VIDAL P., CANTAGREL J. M., LAMEYRE J., MAROT A., ZIMINE S.: ^KERGUELEN: CONTINENTAL FRAGMENT OR OCEANIC ISLAND?^: PETROLOGY AND ISOTOPIC GEOCHEMISTRY EVIDENCE EARTH PLANET. SCI. LETT. 43 [1979] 46-60 doi: 10.1016/0012-821X(79)90154-7
[997] SALTERS V. J. M., HART S. R.: THE MANTLE SOURCES OF OCEAN RIDGES, ISLANDS AND ARCS: THE HF-ISOTOPE CONNECTION EARTH PLANET. SCI. LETT. 104 [1991] 364-380 doi: 10.1016/0012-821X(91)90216-5
[999] GAUTIER I., WEIS D., MENNESSIER J. P., VIDAL P., GIRET A., LOUBET M.: PETROLOGY AND GEOCHEMISTRY OF THE KERGUELEN ARCHIPELAGO BASALTS (SOUTH INDIAN OCEAN): EVOLUTION OF THE MANTLE SOURCES FROM RIDGE TO INTRAPLATE POSITION EARTH PLANET. SCI. LETT. 100 [1990] 59-76 doi: 10.1016/0012-821X(90)90176-X
[1001] STOREY M., SAUNDERS A. D., TARNEY J., LEAT P. T., THIRLWALL M. F., THOMPSON R. N., MENZIES M. A., MARRINER G. F.: GEOCHEMICAL EVIDENCE FOR PLUME-MANTLE INTERACTIONS BENEATH KERGUELEN AND HEARD ISLANDS, INDIAN OCEAN NATURE 336 [1988] 371-374 doi: 10.1038/336371a0
[1002] MATTIELLI N., WEIS D., GREGOIRE M., MENNESSIER J. P., COTTIN J.-Y., GIRET A.: KERGUELEN BASIC AND ULTRABASIC XENOLITHS: EVIDENCE FOR LONG-LIVED KERGUELEN HOTSPOT ACTIVITY LITHOS 37 [1996] 261-280 doi: 10.1016/0024-4937(95)00040-2
[1003] VALBRACHT P. J., HONDA M., MATSUMOTO TAKUYA, MATTIELLI N., MCDOUGALL I., RAGETTLI R., WEIS D.: HELIUM, NEON AND ARGON ISOTOPE SYSTEMATICS IN KERGUELEN ULTRAMAFIC XENOLITHS: IMPLICATIONS FOR MANTLE SOURCE SIGNATURES EARTH PLANET. SCI. LETT. 138 [1996] 29-38 doi: 10.1016/0012-821X(95)00226-3
[1006] BARDINTZEFF J.-M., LEYRIT H., GUILLOU H., GUILLE G., BONIN B., GIRET A., BROUSSE R.: TRANSITION BETWEEN THOLEIITIC AND ALKALI BASALTS: PETROGRAPHICAL AND GEOCHEMICAL EVIDENCE FROM FANGATAUFA PACIFIC OCEAN, AND KERGUELEN, INDIAN OCEAN GEOCHEM. J. 28 [1994] 489-515 doi: 10.2343/geochemj.28.489
[1008] WEIS D., FREY F. A., LEYRIT H., GAUTIER I.: KERGUELEN ARCHIPELAGO REVISITED: GEOCHEMICAL AND ISOTOPIC STUDY OF THE SOUTHEAST PROVINCE LAVAS EARTH PLANET. SCI. LETT. 118 [1993] 101-119 doi: 10.1016/0012-821X(93)90162-3
[1011] HASSLER D. R., SHIMIZU N.: OSMIUM ISOTOPIC EVIDENCE FOR ANCIENT SUBCONTINENTAL LITHOSPHERIC MANTLE BENEATH THE KERGUELEN ISLANDS, SOUTHERN INDIAN OCEAN SCIENCE 280 [1998] 418-421 doi: 10.1126/science.280.5362.418
[1016] GREGOIRE M., LORAND J.-P., COTTIN J.-Y., GIRET A., MATTIELLI N., WEIS D.: XENOLITHS EVIDENCE FOR A REFRACTORY OCEANIC MANTLE PERCOLATED BY BASALTIC MELTS BENEATH THE KERGUELEN ARCHIPELAGO EUR. J. MINERAL. 9 [1997] 1085-1100
[1258] HEDGE C. E., WATKINS N. D., HILDRETH R. A., DOERING W. P.: 87SR/86SR RATIOS IN BASALTS FROM ISLANDS IN THE INDIAN OCEAN EARTH PLANET. SCI. LETT. 21 [1973] 29-34 doi: 10.1016/0012-821X(73)90222-7
[1345] DUPRE B., ALLEGRE C.-J.: PB-SR ISOTOPE VARIATION IN INDIAN OCEAN BASALTS AND MIXING PHENOMENA NATURE 303 [1983] 142-146 doi: 10.1038/303142a0
[1348] WATKINS N. D., GUNN B. M., NOUGIER J., BAKSI A. K.: KERGUELEN: CONTINENTAL FRAGMENT OR OCEANIC ISLAND? BULL. GEOL. SOC. AM. 85 [1974] 201-212 doi: 10.1130/0016-7606(1974)85<201:KCFOOI>2.0.CO;2
[1398] NOUGIER J.: OUTLINE OF THE GEOLOGY OF THE RALLIER DU BATY PENINSULA, KERGUELEN ARCHIPELAGO BULL. SOC. GEOL. FRANCE 8 [1966] 567-576
[1400] BELLAIR P., NOUGIER J.: THE VOLCANISM OF PRESQU^ILE RALLIER DU BATY (ILES DE KERGUELEN) ADIE, R. J. | ANTARCTIC GEOLOGY | NORTH-HOLLAND PUBLISHING COMPANY, AMSTERDAM [1964] 8-13
[1405] GREGOIRE M., MATTIELLI N., NICOLLET C., COTTIN J.-Y., LEYRIT H., WEIS D., SHIMIZU N., GIRET A.: OCEANIC MAFIC GRANULITE XENOLITHS FROM THE KERGUELEN ARCHIPELAGO NATURE 367 [1994] 360-363 doi: 10.1038/367360a0
[1452] MATTIELLI N., WEIS D., SCOATES J. S., SHIMIZU N., MENNESSIER J. P., GREGOIRE M., COTTIN J.-Y., GIRET A.: EVOLUTION OF HETEROGENEOUS LITHOSPHERIC MANTLE IN A PLUME ENVIRONMENT BENEATH THE KERGUELEN ARCHIPELAGO J. PETROL. 40 [1999] 1721-1744 doi: 10.1093/petroj/40.11.1721
[1541] BELLAIR P., CARRON J. P., NOUGIER J., TRICHET J.: LEVELS INSERTED IN BASALTIC LAYERS OF THE PLATEAUS OF THE KERGUELEN ARCHIPELAGO (AUSTRAL ISLANDS AND FRENCH ANTARCTIC) GEOL. RUNDSCHAU 55 [1965] 342-354 doi: 10.1007/BF01765771
[1634] FREY F. A., WEIS D., YANG HUAI-JEN, NICOLAYSEN K. P., LEYRIT H., GIRET A.: TEMPORAL GEOCHEMICAL TRENDS IN KERGUELEN ARCHIPELAGO BASALTS: EVIDENCE FOR DECREASING MAGMA SUPPLY FROM THE KERGUELEN PLUME CHEM. GEOL. 164 [2000] 61-80 doi: 10.1016/S0009-2541(99)00144-8
[1814] GREGOIRE M., LORAND J.-P., O^REILLY S. Y., COTTIN J.-Y.: ARMALCOLITE-BEARING, TI-RICH METASOMATIC ASSEMBLAGE IN HARZBURGITIC XENOLITHS FROM THE KERGUELEN ISLANDS: IMPLICATIONS FOR THE OCEANIC MANTLE BUDGET OF HIGH-FIELD STRENGTH ELEMENTS GEOCHIM. COSMOCHIM. ACTA 64 [2000] 673-694 doi: 10.1016/S0016-7037(99)00345-2
[2030] GREGOIRE M., MOINE B. N., O^REILLY S. Y., COTTIN J.-Y., GIRET A.: TRACE ELEMENT RESIDENCE AND PARTITIONING IN MANTLE XENOLITHS METASOMATIZED BY HIGHLY ALKALINE, SILICATE- AND CARBONATE-RICH MELTS (KERGUELEN ISLANDS, INDIAN OCEAN) J. PETROL. 41 [2000] 477-509 doi: 10.1093/petrology/41.4.477
[4585] MOINE B. N., GREGOIRE M., O^REILLY S. Y., SHEPPARD S. M. F., COTTIN J.-Y.: HIGH FIELD STRENGTH ELEMENT FRACTIONATION IN THE UPPER MANTLE: EVIDENCE FROM AMPHIBOLE-RICH COMPOSITE MANTLE XENOLITHS FROM THE KERGUELEN ISLANDS (INDIAN OCEAN) J. PETROL. 42 [2001] 2145-2167 doi: 10.1093/petrology/42.11.2145
[4649] MOINE B. N., COTTIN J.-Y., SHEPPARD S. M. F., GREGOIRE M., O^REILLY S. Y., GIRET A.: INCOMPATIBLE TRACE ELEMENT AND ISOTOPIC (D/H) CHARACTERISTICS OF AMPHIBOLE- AND PHLOGOPITE-BEARING ULTRAMAFIC TO MAFIC XENOLITHS FROM KERGUELEN ISLANDS (TAAF, SOUTH INDIAN OCEAN) EUR. J. MINERAL. 12 [2000] 761-777 doi: 10.1127/0935-1221/2000/0012-0761
[4681] GREGOIRE M., JACKSON I., O^REILLY S. Y., COTTIN J.-Y.: THE LITHOSPHERIC MANTLE BENEATH THE KERGUELEN ISLANDS (INDIAN OCEAN): PETROLOGICAL AND PETROPHYSICAL CHARACTERISTICS OF MANTLE MAFIC ROCK TYPES AND CORRELATION WITH SEISMIC PROFILES CONTRIB. MINERAL. PETROL. 142 [2001] 244-259 doi: 10.1007/s004100100289
[5174] FREY F. A., NICOLAYSEN K. P., KUBIT B. K., WEIS D., GIRET A.: FLOOD BASALT FROM MONT TOURMENTE IN THE CENTRAL KERGUELEN ARCHIPELAGO: THE CHANGE FROM TRANSITIONAL TO ALKALIC BASALT ~25 MA J. PETROL. 43 [2002] 1367-1387 doi: 10.1093/petrology/43.7.1367
[5176] MATTIELLI N., WEIS D., BLICHERT-TOFT J., ALBAREDE F.: HF ISOTOPE EVIDENCE FOR A MIOCENE CHANGE IN THE KERGUELEN MANTLE PLUME COMPOSITION J. PETROL. 43 [2002] 1327-1339 doi: 10.1093/petrology/43.7.1327
[5177] DOUCET S., WEIS D., SCOATES J. S., NICOLAYSEN K. P., FREY F. A., GIRET A.: THE DEPLETED MANTLE COMPONENT IN KERGUELEN ARCHIPELAGO BASALTS: PETROGENESIS F THOLEIITIC-TRANSITIONAL BASALTS FROM THE LORANCHET PENINSULA J. PETROL. 43 [2002] 1341-1366 doi: 10.1093/petrology/43.7.1341
[5216] DAVID K., SCHIANO P., ALLEGRE C.-J.: ASSESSMENT OF THE ZR/HF FRACTIONATION IN OCEANIC BASALTS AND CONTINENTAL MATERIALS DURING PETROGENETIC PROCESSES EARTH PLANET. SCI. LETT. 178 [2000] 285-301 doi: 10.1016/S0012-821X(00)00088-1
[6188] GAGNEVIN D., ETHIEN R., BONIN B., MOINE B. N., FERAUD G., GERBE M. C., COTTIN J.-Y., MICHON G., TOURPIN S., MAMIAS G., PERRACHE C., GIRET A.: OPEN-SYSTEM PROCESSES IN THE GENESIS OF SILICA-OVERSATURATED ALKALINE ROCKS OF THE RALLIER-DU-BATY PENINSULA, KERGUELEN ARCHIPELAGO (INDIAN OCEAN) J. VOLCANOL. GEOTHERM. RES. 123 [2003] 267-300 doi: 10.1016/S0377-0273(02)00509-7
[6568] INGLE S. P., WEIS D., DOUCET S., MATTIELLI N.: HF ISOTOPE CONSTRAINTS ON MANTLE SOURCES AND SHALLOW-LEVEL CONTAMINANTS DURING THE KERGUELEN HOTSPOT ACTIVITY SINCE ~120 MA GEOCHEMISTRY GEOPHYSICS GEOSYSTEMS 4 [2003] doi: 10.1029/2002GC000482
[7059] LORAND J.-P., DELPECH G., GREGOIRE M., MOINE B. N., O^REILLY S. Y., COTTIN J.-Y.: PLATINUM-GROUP ELEMENTS AND THE MULTISTAGE METASOMATIC HISTORY OF KERGUELEN LITHOSPHERIC MANTLE (SOUTH INDIAN OCEAN) CHEM. GEOL. 208 [2004] 195-215 doi: 10.1016/j.chemgeo.2004.04.012
[7247] MOINE B. N., GREGOIRE M., O^REILLY S. Y., DELPECH G., SHEPPARD S. M. F., LORAND J.-P., RENAC C., GIRET A., COTTIN J.-Y.: CARBONATITE MELT IN OCEANIC UPPER MANTLE BENEATH THE KERGUELEN ARCHIPELAGO LITHOS 75 [2004] 239-252 doi: 10.1016/j.lithos.2003.12.019
[7525] DOUCET S., SCOATES J. S., WEIS D., GIRET A.: CONSTRAINING THE COMPONENTS OF THE KERGUELEN MANTLE PLUME: A HF-PB-SR-ND ISOTOPIC STUDY OF PICRITES AND HIGH-MGO BASALTS FROM THE KERGUELEN ARCHIPELAGO GEOCHEMISTRY GEOPHYSICS GEOSYSTEMS 6 [2005] GeoReM-id: 500 doi: 10.1029/2004GC000806
[8665] DOUCET S., MOREIRA M. A., WEIS D., SCOATES J. S., GIRET A., ALLEGRE C.-J.: PRIMITIVE NEON AND HELIUM ISOTOPIC COMPOSITIONS OF HIGH-MGO BASALTS FROM THE KERGUELEN ARCHIPELAGO, INDIAN OCEAN EARTH PLANET. SCI. LETT. 241 [2006] 65-79 doi: 10.1016/j.epsl.2005.10.025
[10516] XU GUANGPING, FREY F. A., WEIS D., SCOATES J. S., GIRET A.: FLOOD BASALTS FROM MT. CAPITOLE IN THE CENTRAL KERGUELEN ARCHIPELAGO: INSIGHTS INTO THE GROWTH OF THE ARCHIPELAGO AND SOURCE COMPONENTS CONTRIBUTING TO PLUME-RELATED VOLCANISM GEOCHEMISTRY GEOPHYSICS GEOSYSTEMS 8 [2007] GeoReM-id: 3012 doi: 10.1029/2007GC001608
[11073] SCOATES J. S., WEIS D., FRANSSENS M., MATTIELLI N., ANNELL H., FREY F. A., NICOLAYSEN K. P., GIRET A.: THE VAL GABBRO PLUTONIC SUITE: A SUB-VOLCANIC INTRUSION EMPLACED AT THE END OF FLOOD BASALT VOLCANISM ON THE KERGUELEN ARCHIPELAGO J. PETROL. 49 [2008] 79-105 GeoReM-id: 4060 doi: 10.1093/petrology/egm071
[11266] GIRET A., BEAUX J.-F.: THE PLUTONIC MASSIF OF VAL GABBRO (KERGUELEN ISLANDS), A THOLEIITIC COMPLEX RELATED TO THE ACTIVITY OF THE EAST-INDIAN PALEORIDGE COMPT. REND. ACAD. SCI. PARIS SER. 2A 299 [1984] 965-970
[11370] NOUGIER J., PAWLOWSKI D., CANTAGREL J. M.: CHRONO-SPATIAL EVOLUTION OF THE VOLCANIC ACTIVITY IN SOUTHEASTERN KERGUELEN (T.A.A.F.) R. L. OLIVER, P. R. JAMES, J. B. JAGO (EDS) | ANTARCTIC EARTH SCIENCE, 4TH INTERN. SYMP. | CAMBRIDGE UNIV. PRESS, CAMBRIDGE [1983] 640-645
[14756] NOBRE SILVA I. G., WEIS D., SCOATES J. S.: EFFECTS OF ACID LEACHING ON THE SR-ND-HF ISOTOPIC COMPOSITIONS OF OCEAN ISLAND BASALTS GEOCHEMISTRY GEOPHYSICS GEOSYSTEMS 11 [2010] GeoReM-id: 5464 doi: 10.1029/2010GC003176
[14785] NOBRE SILVA I. G., WEIS D., BARLING J., SCOATES J. S.: LEACHING SYSTEMATICS AND MATRIX ELIMINATION FOR THE DETERMINATION OF HIGH-PRECISION PB ISOTOPE COMPOSITIONS OF OCEAN ISLAND BASALTS GEOCHEMISTRY GEOPHYSICS GEOSYSTEMS 10 [2009] doi: 10.1029/2009GC002537
[20779] WASILEWSKI B., DOUCET L. S., MOINE B. N., BEUNON H., DELPECH G., MATTIELLI N., DEBAILLE V., DELACOUR A., GREGOIRE M., GUILLAUME D., COTTIN J.-Y.: ULTRA-REFRACTORY MANTLE WITHIN OCEANIC PLATEAU: PETROLOGY OF THE SPINEL HARZBURGITES FROM LAC MICHELE, KERGUELEN ARCHIPELAGO LITHOS 272-273 [2017] 336-349 GeoReM-id: 10592 doi: 10.1016/j.lithos.2016.12.010
[truncated: 121 more columns]

## Sheet: TRISTAN
CITATIONS	TECTONIC SETTING	LOCATION	LOCATION COMMENT	LATITUDE MIN	LATITUDE MAX	LONGITUDE MIN	LONGITUDE MAX	LAND OR SEA	ELEVATION MIN	ELEVATION MAX	SAMPLE NAME	ROCK NAME	MIN. AGE (YRS.)	MAX. AGE (YRS.)	GEOL.	AGE	ERUPTION DAY	ERUPTION MONTH	ERUPTION YEAR	ROCK TEXTURE	ROCK TYPE	DRILL DEPTH MIN	DRILL DEPTHAX	ALTERATION	MINERAL	MATERIAL	SIO2(WT%)	TIO2(WT%)	B2O3(WT%)	AL2O3(WT%)	CR2O3(WT%)	FE2O3(WT%)	FEO(WT%)	FEOT(WT%)	CAO(WT%)	MGO(WT%)	MNO(WT%)	NIO(WT%)	K2O(WT%)	NA2O(WT%)	P2O5(WT%)	H2O(WT%)	H2OP(WT%)	H2OM(WT%)	H2OT(WT%)	CO2(WT%)	CO1(WT%)	F(WT%)	CL(WT%)
[115]	OCEAN ISLAND	TRISTAN DA CUNHA GROUP / TRISTAN DA CUNHA	BUFF GULCH	-37.05	-37.05	-12.3	-12.3	SAE			s_TK26 [115]	GABBRO [115]									PLU				HE3_HE4(R/R(A)) from AMPHIBOLE [115]	MIN [115]
[115]	OCEAN ISLAND	TRISTAN DA CUNHA GROUP / TRISTAN DA CUNHA	BUFF GULCH	-37.05	-37.05	-12.3	-12.3	SAE			s_TK26 [115]	GABBRO [115]									PLU				HE3_HE4(R/R(A)) from AMPHIBOLE [115]	MIN [115]
[115]	OCEAN ISLAND	TRISTAN DA CUNHA GROUP / TRISTAN DA CUNHA	NEAR BIG POINT	-37.05	-37.05	-12.3	-12.3	SAE			s_TK46A [115]	ANKARAMITE [115]									VOL				HE3_HE4(R/R(A)) from OLIVINE [115]	MIN [115]
[115]	OCEAN ISLAND	TRISTAN DA CUNHA GROUP / TRISTAN DA CUNHA	NEAR BIG POINT	-37.05	-37.05	-12.3	-12.3	SAE			s_TK46A [115]	ANKARAMITE [115]									VOL				HE3_HE4(R/R(A)) from OLIVINE [115]	MIN [115]
[115]	OCEAN ISLAND	TRISTAN DA CUNHA GROUP / TRISTAN DA CUNHA	NEAR BIG POINT	-37.05	-37.05	-12.3	-12.3	SAE			s_TK46A [115]	ANKARAMITE [115]									VOL				HE3_HE4(R/R(A)) from CLINOPYROXENE [115]	MIN [115]
[16286][94]	OCEAN ISLAND	TRISTAN DA CUNHA GROUP / TRISTAN DA CUNHA		-37.1	-37.2	-12.2	-12.3	SAE			s_TR-6 [16286] / s_TR-6NMNH110019 [94]	BASALT [16286]									VOL					WR [16286]
[521]	OCEAN ISLAND	TRISTAN DA CUNHA GROUP / TRISTAN DA CUNHA	PLANTATION GULCH, MAIN CLIFFS	-37.05	-37.05	-12.3	-12.3	SAE			s_TDC69 [521]	BASANITE, ANKARAMITIC [521]								PORPHYRITIC [521]	VOL					WR [521]	42.63	3.17		11.32				14.58	11.31	11.97	0.17		1.52	2.74	0.39			0.12
[521]	OCEAN ISLAND	TRISTAN DA CUNHA GROUP / TRISTAN DA CUNHA		-37.1	-37.2	-12.2	-12.3	SAE			s_TR114 [521]	BASANITE, ANKARAMITIC [521]								PORPHYRITIC [521]	VOL					WR [521]	43.18	3.67		13.13				13.4	11.73	8.9	0.16		1.66	3.08	0.54
[521]	OCEAN ISLAND	TRISTAN DA CUNHA GROUP / TRISTAN DA CUNHA	RUNAWAY BEACH	-37.05	-37.05	-12.3	-12.3	SAE			s_TDC32 [521]	BASANITE [521]								APHYRIC [521]	VOL					WR [521]	45.5	3.2		16.6				10.67	9.06	4.37	0.19		3	4.49	0.97			0.17
[521]	OCEAN ISLAND	TRISTAN DA CUNHA GROUP / TRISTAN DA CUNHA	PLANTATION GULCH, MAIN CLIFFS	-37.05	-37.05	-12.3	-12.3	SAE			s_TDC75 [521]	BASANITE [521]								APHYRIC [521]	VOL					WR [521]	45.31	3.56		16.19				11.67	10.15	5.12	0.22		2.66	4.02	0.69			0.1
[521]	OCEAN ISLAND	TRISTAN DA CUNHA GROUP / TRISTAN DA CUNHA	PLANTATION GULCH, MAIN CLIFFS	-37.05	-37.05	-12.3	-12.3	SAE			s_TDC78 [521]	BASANITE [521]								APHYRIC [521]	VOL					WR [521]	46.1	3.26		16.26				11.07	9.57	5.02	0.22		2.9	4.38	0.83			0.1
[521]	OCEAN ISLAND	TRISTAN DA CUNHA GROUP / TRISTAN DA CUNHA	PLANTATION GULCH, MAIN CLIFFS	-37.05	-37.05	-12.3	-12.3	SAE			s_TDC79 [521]	BASANITE [521]								APHYRIC [521]	VOL					WR [521]	45.71	3.37		16.69				11.04	9.65	5.07	0.21		2.89	4.43	0.97			0.12
[521]	OCEAN ISLAND	TRISTAN DA CUNHA GROUP / TRISTAN DA CUNHA	BETWEEN PLANTATION AND CAVES GULCHES	-37.05	-37.05	-12.3	-12.3	SAE			s_ALR9T [521]	BASANITE [521]								APHYRIC [521]	VOL					WR [521]	46.17	3.17		17.15				10.39	9.18	4.53	0.18		2.91	4.27	1.15			0.11
[521]	OCEAN ISLAND	TRISTAN DA CUNHA GROUP / TRISTAN DA CUNHA	PLANTATION GULCH, MAIN CLIFFS	-37.05	-37.05	-12.3	-12.3	SAE			s_TDC55 [521]	BASANITE [521]								SPARSELY PHYRIC [521]	VOL					WR [521]	43.28	4.11		15.93				12.31	11	6.07	0.18		2.12	3.4	1.05			0.32
[521]	OCEAN ISLAND	TRISTAN DA CUNHA GROUP / TRISTAN DA CUNHA	PLANTATION GULCH, MAIN CLIFFS	-37.05	-37.05	-12.3	-12.3	SAE			s_TDC86 [521]	BASANITE [521]								APHYRIC [521]	VOL					WR [521]	45.83	3.47		17.19				10.01	9.67	4.25	0.24		3.15	4.54	1.19			0.16
[521]	OCEAN ISLAND	TRISTAN DA CUNHA GROUP / TRISTAN DA CUNHA	GIPSY GULCH	-37.05	-37.05	-12.3	-12.3	SAE			s_TDC28 [521]	PHONOTEPHRITE [521]								PORPHYRIC [521]	VOL					WR [521]	49.84	2.22		18.49				6.66	5.85	2.26	0.16		4.18	5.86	0.76			0.11
[521]	OCEAN ISLAND	TRISTAN DA CUNHA GROUP / TRISTAN DA CUNHA	PLANTATION GULCH, MAIN CLIFFS	-37.05	-37.05	-12.3	-12.3	SAE			s_TDC64 [521]	PHONOTEPHRITE [521]								APHYRIC [521]	VOL					WR [521]	48.38	3.08		17.49				9.16	8.18	4.08	0.17		3.47	4.69	0.95			0.3
[521]	OCEAN ISLAND	TRISTAN DA CUNHA GROUP / TRISTAN DA CUNHA	PLANTATION GULCH, MAIN CLIFFS	-37.05	-37.05	-12.3	-12.3	SAE			s_TDC67 [521]	PHONOTEPHRITE [521]								APHYRIC [521]	VOL					WR [521]	48.14	3.06		17.66				8.89	8.35	3.94	0.18		3.56	4.36	1.13			0.26
[521]	OCEAN ISLAND	TRISTAN DA CUNHA GROUP / TRISTAN DA CUNHA	PLANTATION GULCH, MAIN CLIFFS	-37.05	-37.05	-12.3	-12.3	SAE			s_TDC73 [521]	PHONOTEPHRITE [521]								APHYRIC [521]	VOL					WR [521]	51.2	2.3		18.49				7.28	6.77	2.95	0.19		4.13	4.85	0.9			0.19
[521]	OCEAN ISLAND	TRISTAN DA CUNHA GROUP / TRISTAN DA CUNHA	PLANTATION GULCH, MAIN CLIFFS	-37.05	-37.05	-12.3	-12.3	SAE			s_TDC83 [521]	PHONOTEPHRITE [521]								PORPHYRIC [521]	VOL					WR [521]	48.02	2.98		18.7				8.85	7.39	3.39	0.2		3.89	5.07	1.21			0.19
[521]	OCEAN ISLAND	TRISTAN DA CUNHA GROUP / TRISTAN DA CUNHA	HOTTENTOT GULCH	-37.05	-37.05	-12.3	-12.3	SAE			s_ALR1T [521]	PHONOLITE, TEPHRI [521]								APHYRIC [521]	VOL					WR [521]	54.8	1.59		19.13				5.37	5.48	1.43	0.21		4.89	5.49	0.37			0.11
[521]	OCEAN ISLAND	TRISTAN DA CUNHA GROUP / TRISTAN DA CUNHA	GIPSY GULCH	-37.05	-37.05	-12.3	-12.3	SAE			s_TDC26 [521]	PHONOLITE, TEPHRI [521]								PORPHYRIC [521]	VOL					WR [521]	56.93	1.33		19.5				4.64	3.84	1.31	0.15		5.39	6.08	0.31			0.2
[521]	OCEAN ISLAND	TRISTAN DA CUNHA GROUP / TRISTAN DA CUNHA	GIPSY GULCH	-37.05	-37.05	-12.3	-12.3	SAE			s_TDC27 [521]	PHONOLITE, TEPHRI [521]								PORPHYRIC [521]	VOL					WR [521]	55.82	1.29		18.77				4.54	3.54	1.29	0.14		4.93	6.66	0.32			0.29
[521]	OCEAN ISLAND	TRISTAN DA CUNHA GROUP / TRISTAN DA CUNHA	LAGOON GULCH	-37.05	-37.05	-12.3	-12.3	SAE			s_TDC53 [521]	PHONOLITE, TEPHRI [521]								APHYRIC [521]	VOL					WR [521]	55.1	1.61		19.49				5.31	5.49	1.47	0.17		4.52	6.35	0.37			0.07
[521]	OCEAN ISLAND	TRISTAN DA CUNHA GROUP / TRISTAN DA CUNHA	GIPSY GULCH	-37.05	-37.05	-12.3	-12.3	SAE			s_TR17 [521]	PHONOLITE, TEPHRI [521]								APHYRIC [521]	VOL					WR [521]	54.95	1.64		19.42				5.45	5.62	1.43	0.19		4.89	5.72	0.39
[521]	OCEAN ISLAND	TRISTAN DA CUNHA GROUP / TRISTAN DA CUNHA	PLANTATION GULCH, MAIN CLIFFS	-37.05	-37.05	-12.3	-12.3	SAE			s_TDC57 [521]	BASANITE [521]									VOL					WR [521]
[521]	OCEAN ISLAND	TRISTAN DA CUNHA GROUP / TRISTAN DA CUNHA		-37.1	-37.2	-12.2	-12.3	SAE			s_TR347 [521]	BASANITE [521]									VOL					WR [521]
[521]	OCEAN ISLAND	TRISTAN DA CUNHA GROUP / TRISTAN DA CUNHA	BETWEEN HOTTENTOT AND SANDY GULCHES	-37.05	-37.05	-12.3	-12.3	SAE			s_TR30 [521]	PHONOLITE [521]									VOL					WR [521]
[521]	OCEAN ISLAND	TRISTAN DA CUNHA GROUP / TRISTAN DA CUNHA	BETWEEN HOTTENTOT AND SANDY GULCHES	-37.05	-37.05	-12.3	-12.3	SAE			s_TR31 [521]	PHONOLITE [521]									VOL					WR [521]
[521]	OCEAN ISLAND	TRISTAN DA CUNHA GROUP / TRISTAN DA CUNHA		-37.1	-37.2	-12.2	-12.3	SAE			s_TR560 [521]	PHONOLITE [521]									VOL					WR [521]
[5216]	OCEAN ISLAND	TRISTAN DA CUNHA GROUP / TRISTAN DA CUNHA		-37.1	-37.2	-12.2	-12.3	SAE			s_1962-128-64 [5216]	BASANITE [5216]									VOL					WR [5216]	41.19	4.08		13.47		14.89	10.15		11.55	9.56	0.16		1.61	2.43	0.93
[520]	OCEAN ISLAND	TRISTAN DA CUNHA GROUP / INACCESSIBLE	DIKE, 0.9 KM SOUTHEAST OF NORTH POINT	-37.32	-37.32	-12.73	-12.73	SAE			s_32175 [520]	BASALT, ALKALINE [520]								APHYRIC [520]	VOL					WR [520]	46.42	2.69		13.91				10.02	9.76	9.15	0.16		2.3	3.4	0.67
[520]	OCEAN ISLAND	TRISTAN DA CUNHA GROUP / INACCESSIBLE	DIKE, WARREN CLIFF CAVE	-37.32	-37.32	-12.73	-12.73	SAE			s_27854 [520]	BASALT, ALKALINE [520]								FINE-GRAINED [520]	VOL					WR [520]	47.05	3.13		16.44				10.73	9.36	4.22	0.21		2.31	3.33	0.66
[520]	OCEAN ISLAND	TRISTAN DA CUNHA GROUP / INACCESSIBLE	LONG RIDGE, 1.2 KM SOUTH OF NORTH POINT	-37.32	-37.32	-12.73	-12.73	SAE			s_27856 [520]	ANKARAMITE [520]									VOL					WR [520]	47.25	2.36		13.02				9.92	12.53	8.23	0.17		2.08	2.6	0.47
[520]	OCEAN ISLAND	TRISTAN DA CUNHA GROUP / INACCESSIBLE		-37.32	-37.32	-12.73	-12.73	SAE			s_GEOL10 [520]	OCEANITE [520]									VOL					WR [520]	47.73	2.84		14.23				10.27	9.55	8.36	0.15		1.16	3.56	0.5
[520]	OCEAN ISLAND	TRISTAN DA CUNHA GROUP / INACCESSIBLE	DIKE, WARREN CLIFF CAVE	-37.32	-37.32	-12.73	-12.73	SAE			s_32183 [520]	BASALT, ALKALINE [520]									VOL					WR [520]	47.96	2.66		15.35				9.92	9.1	7.26	0.14		2.03	3.53	0.74
[520]	OCEAN ISLAND	TRISTAN DA CUNHA GROUP / INACCESSIBLE	1.5 KM SOUTH OF CAIRN PEAK	-37.32	-37.32	-12.73	-12.73	SAE			s_925.01 [520]	BASALT, ALKALINE [520]									VOL					WR [520]	48.02	3.08		15.88				10.28	8.75	6.65	0.15		1.92	3.15	0.68
[520]	OCEAN ISLAND	TRISTAN DA CUNHA GROUP / INACCESSIBLE	DIKE, WARREN CLIFF CAVE	-37.32	-37.32	-12.73	-12.73	SAE			s_32182 [520]	BASALT, ALKALINE [520]									VOL					WR [520]	48.03	2.7		15.68				9.66	9.38	6.47	0.15		2.04	3.56	0.73
[520]	OCEAN ISLAND	TRISTAN DA CUNHA GROUP / INACCESSIBLE	DIKE, WARREN CLIFF CAVE	-37.32	-37.32	-12.73	-12.73	SAE			s_32184 [520]	BASALT, ALKALINE [520]									VOL					WR [520]	48.2	2.71		15.65				9.81	9.17	6.75	0.14		2.07	3.54	0.74
[520]	OCEAN ISLAND	TRISTAN DA CUNHA GROUP / INACCESSIBLE		-37.32	-37.32	-12.73	-12.73	SAE			s_32177 [520]	BASALT, ALKALINE [520]									VOL					WR [520]	48.33	3		16.39				9.76	9.22	4.1	0.14		2.01	3.94	0.51
[520]	OCEAN ISLAND	TRISTAN DA CUNHA GROUP / INACCESSIBLE	HAROLD^S RIDGE, 600 M NORTHWEST OF CAIRN PEAK	-37.32	-37.32	-12.73	-12.73	SAE			s_3/24.01 [520]	BASALT, ALKALINE [520]									VOL					WR [520]	48.45	3.1		16.4				10.1	8.49	5.64	0.12		1.96	3.43	0.69
[520]	OCEAN ISLAND	TRISTAN DA CUNHA GROUP / INACCESSIBLE	50 M SOUTHEAST OF NORTH POINT	-37.32	-37.32	-12.73	-12.73	SAE			s_27855 [520]	BASALT, ALKALINE [520]									VOL					WR [520]	48.59	2.94		16.28				9.77	8.69	6.37	0.14		1.97	3.53	0.69
[520]	OCEAN ISLAND	TRISTAN DA CUNHA GROUP / INACCESSIBLE	750 M NNE OF WEST POINT	-37.32	-37.32	-12.73	-12.73	SAE			s_27861 [520]	BASALT, ALKALINE [520]									VOL					WR [520]	48.79	2.82		16.01				8.8	9.79	5.29	0.14		2.06	3.68	0.61
[520]	OCEAN ISLAND	TRISTAN DA CUNHA GROUP / INACCESSIBLE	NORTH SIDE OF SWALES FELL (SUMMIT PEAK)	-37.32	-37.32	-12.73	-12.73	SAE			s_5/25.01 [520]	BASALT [520]									VOL					WR [520]	49.47	3.18		17.13				10.07	7.96	4.17	0.15		2.28	3.6	0.66
[520]	OCEAN ISLAND	TRISTAN DA CUNHA GROUP / INACCESSIBLE	1.1 KM SSE OF WEST POINT	-37.32	-37.32	-12.73	-12.73	SAE			s_27853 [520]	TRACHYBASALT [520]									VOL					WR [520]	50.45	2.47		17.78				8.06	7.37	2.63	0.13		2.78	4.63	0.78
[520]	OCEAN ISLAND	TRISTAN DA CUNHA GROUP / INACCESSIBLE	NEAR TOP OF WEST ROAD, 400 M ESE OF BLENDEN HALL BEACH	-37.32	-37.32	-12.73	-12.73	SAE			s_27860 [520]	TRACHYBASALT [520]									VOL					WR [520]	50.66	2.13		16.03				8.57	7.19	6.39	0.13		2.87	4.17	0.74
[520]	OCEAN ISLAND	TRISTAN DA CUNHA GROUP / INACCESSIBLE	BLENDEN HALL DOME, 700 M SOUTHEAST OF WEST POINT	-37.32	-37.32	-12.73	-12.73	SAE			s_27858 [520]	TRACHYBASALT [520]									VOL					WR [520]	63.39	0.55		18.05				2.84	1.21	0.36	0.07		5.78	6.62	0.16
[509]	OCEAN ISLAND	TRISTAN DA CUNHA GROUP / TRISTAN DA CUNHA		-37.1	-37.2	-12.2	-12.3	SAE			s_TR232 [509]	TRACHYANDESITE [509]	200 [509]	300 [509]							VOL					WR [509]
[509]	OCEAN ISLAND	TRISTAN DA CUNHA GROUP / TRISTAN DA CUNHA		-37.1	-37.2	-12.2	-12.3	SAE			s_TR232 [509]	TRACHYANDESITE [509]	200 [509]	300 [509]							VOL					WR [509]
[509]	OCEAN ISLAND	TRISTAN DA CUNHA GROUP / TRISTAN DA CUNHA		-37.1	-37.2	-12.2	-12.3	SAE			s_TR518 [509]	TRACHYANDESITE [509]							1961		VOL					WR [509]
[509]	OCEAN ISLAND	TRISTAN DA CUNHA GROUP / TRISTAN DA CUNHA		-37.1	-37.2	-12.2	-12.3	SAE			s_TR627 [509]	TRACHYANDESITE [509]							1961		VOL					WR [509]
[509]	OCEAN ISLAND	TRISTAN DA CUNHA GROUP / TRISTAN DA CUNHA		-37.1	-37.2	-12.2	-12.3	SAE			s_TR516 [509]	TRACHYANDESITE [509]							1961		VOL					WR [509]
[509]	OCEAN ISLAND	TRISTAN DA CUNHA GROUP / TRISTAN DA CUNHA		-37.1	-37.2	-12.2	-12.3	SAE			s_TR516 [509]	TRACHYANDESITE [509]							1961		VOL					WR [509]
[523]	OCEAN ISLAND	TRISTAN DA CUNHA GROUP / TRISTAN DA CUNHA		-37.1	-37.2	-12.2	-12.3	SAE			s_TK6 [523]	BASALT, ALKALINE, OLIVINE [523]									VOL					WR [523]		3.57									0.12
[523]	OCEAN ISLAND	TRISTAN DA CUNHA GROUP / TRISTAN DA CUNHA		-37.1	-37.2	-12.2	-12.3	SAE			s_TK8 [523]	BASALT, ALKALINE, OLIVINE [523]									VOL					WR [523]		3.5									0.19
[523]	OCEAN ISLAND	TRISTAN DA CUNHA GROUP / TRISTAN DA CUNHA		-37.1	-37.2	-12.2	-12.3	SAE			s_TK11 [523]	BASALT, ALKALINE, OLIVINE [523]									VOL					WR [523]		4.32									0.14
[523]	OCEAN ISLAND	TRISTAN DA CUNHA GROUP / TRISTAN DA CUNHA		-37.1	-37.2	-12.2	-12.3	SAE			s_TK13 [523]	BASALT, ALKALINE, OLIVINE [523]									VOL					WR [523]		3.86									0.18
[523]	OCEAN ISLAND	TRISTAN DA CUNHA GROUP / TRISTAN DA CUNHA		-37.1	-37.2	-12.2	-12.3	SAE			s_TK35 [523]	BASALT, ALKALINE, OLIVINE [523]									VOL					WR [523]		3.75									0.18
[523]	OCEAN ISLAND	TRISTAN DA CUNHA GROUP / TRISTAN DA CUNHA		-37.1	-37.2	-12.2	-12.3	SAE			s_TK41 [523]	BASALT, ALKALINE, OLIVINE [523]									VOL					WR [523]		3.69									0.18
[523]	OCEAN ISLAND	TRISTAN DA CUNHA GROUP / TRISTAN DA CUNHA		-37.1	-37.2	-12.2	-12.3	SAE			s_TK46 [523]	BASALT, ALKALINE, OLIVINE [523]									VOL					WR [523]		3.13									0.18
[523]	OCEAN ISLAND	TRISTAN DA CUNHA GROUP / TRISTAN DA CUNHA		-37.1	-37.2	-12.2	-12.3	SAE			s_TK2 [523]	TRACHYBASALT [523]									VOL					WR [523]		3.23									0.19
[523]	OCEAN ISLAND	TRISTAN DA CUNHA GROUP / TRISTAN DA CUNHA		-37.1	-37.2	-12.2	-12.3	SAE			s_TK12 [523]	TRACHYBASALT [523]									VOL					WR [523]		3.31									0.21
[523]	OCEAN ISLAND	TRISTAN DA CUNHA GROUP / TRISTAN DA CUNHA		-37.1	-37.2	-12.2	-12.3	SAE			s_TK23 [523]	TRACHYBASALT [523]									VOL					WR [523]		2.95									0.17
[523]	OCEAN ISLAND	TRISTAN DA CUNHA GROUP / TRISTAN DA CUNHA		-37.1	-37.2	-12.2	-12.3	SAE			s_TK38 [523]	TRACHYBASALT [523]									VOL					WR [523]		3.45									0.19
[523]	OCEAN ISLAND	TRISTAN DA CUNHA GROUP / TRISTAN DA CUNHA		-37.1	-37.2	-12.2	-12.3	SAE			s_TK9 [523]	TRACHYBASALT [523]									VOL					WR [523]		2.64									0.21
[523]	OCEAN ISLAND	TRISTAN DA CUNHA GROUP / TRISTAN DA CUNHA		-37.1	-37.2	-12.2	-12.3	SAE			s_TK33 [523]	TRACHYBASALT [523]									VOL					WR [523]		3.09									0.17
[523]	OCEAN ISLAND	TRISTAN DA CUNHA GROUP / TRISTAN DA CUNHA		-37.1	-37.2	-12.2	-12.3	SAE			s_TK4 [523]	TRACHYBASALT [523]									VOL					WR [523]		3.38									0.28
[523]	OCEAN ISLAND	TRISTAN DA CUNHA GROUP / TRISTAN DA CUNHA		-37.1	-37.2	-12.2	-12.3	SAE			s_TK10 [523]	TRACHYBASALT [523]									VOL					WR [523]		2.6									0.19
[523]	OCEAN ISLAND	TRISTAN DA CUNHA GROUP / TRISTAN DA CUNHA		-37.1	-37.2	-12.2	-12.3	SAE			s_TK22 [523]	TRACHYBASALT [523]									VOL					WR [523]		3.35									0.18
[523]	OCEAN ISLAND	TRISTAN DA CUNHA GROUP / TRISTAN DA CUNHA		-37.1	-37.2	-12.2	-12.3	SAE			s_TK45 [523]	TRACHYBASALT [523]									VOL					WR [523]		2.79									0.18
[523]	OCEAN ISLAND	TRISTAN DA CUNHA GROUP / TRISTAN DA CUNHA		-37.1	-37.2	-12.2	-12.3	SAE			s_TK48 [523]	TRACHYBASALT [523]									VOL					WR [523]		3.15									0.2
[523]	OCEAN ISLAND	TRISTAN DA CUNHA GROUP / TRISTAN DA CUNHA		-37.1	-37.2	-12.2	-12.3	SAE			s_TK19 [523]	TRACHYANDESITE [523]									VOL					WR [523]		1.27									0.17
[523]	OCEAN ISLAND	TRISTAN DA CUNHA GROUP / TRISTAN DA CUNHA		-37.1	-37.2	-12.2	-12.3	SAE			s_TK50 [523]	TRACHYANDESITE [523]									VOL					WR [523]		1.64									0.18
[523]	OCEAN ISLAND	TRISTAN DA CUNHA GROUP / TRISTAN DA CUNHA		-37.1	-37.2	-12.2	-12.3	SAE			s_TK14 [523]	TRACHYTE [523]									VOL					WR [523]		0.52									0.16
[511]	OCEAN ISLAND	TRISTAN DA CUNHA GROUP / TRISTAN DA CUNHA		-37.1	-37.2	-12.2	-12.3	SAE			s_1 [511]	BASALT, ALKALINE [511]									VOL					WR [511]
[511]	OCEAN ISLAND	TRISTAN DA CUNHA GROUP / TRISTAN DA CUNHA		-37.1	-37.2	-12.2	-12.3	SAE			s_2 [511]	TRACHYBASALT [511]									VOL					WR [511]
[511]	OCEAN ISLAND	TRISTAN DA CUNHA GROUP / TRISTAN DA CUNHA		-37.1	-37.2	-12.2	-12.3	SAE			s_3 [511]	TRACHYANDESITE [511]									VOL					WR [511]
[511]	OCEAN ISLAND	TRISTAN DA CUNHA GROUP / TRISTAN DA CUNHA		-37.1	-37.2	-12.2	-12.3	SAE			s_4 [511]	TRACHYTE [511]									VOL					WR [511]
[510]	OCEAN ISLAND	TRISTAN DA CUNHA GROUP / TRISTAN DA CUNHA		-37.1	-37.2	-12.2	-12.3	SAE			s_17 [510]	TRACHYTE [510]									VOL					WR [510]
[510]	OCEAN ISLAND	TRISTAN DA CUNHA GROUP / TRISTAN DA CUNHA		-37.1	-37.2	-12.2	-12.3	SAE			s_18 [510]	GABBRO [510]									PLU					WR [510]
[510]	OCEAN ISLAND	TRISTAN DA CUNHA GROUP / INACCESSIBLE		-37.32	-37.32	-12.73	-12.73	SAE			s_19 [510]	TRACHYTE [510]									VOL					WR [510]
[510]	OCEAN ISLAND	TRISTAN DA CUNHA GROUP / INACCESSIBLE		-37.32	-37.32	-12.73	-12.73	SAE			s_20 [510]	TRACHYBASALT [510]									VOL					WR [510]
[510]	OCEAN ISLAND	TRISTAN DA CUNHA GROUP / NIGHTINGALE		-37	-37	-12	-12	SAE			s_21 [510]	TRACHYTE [510]									VOL					WR [510]
[517]	OCEAN ISLAND	TRISTAN DA CUNHA GROUP / TRISTAN DA CUNHA		-37.1	-37.2	-12.2	-12.3	SAE			s_TC-3 [517]	BASALT, OLIVINE [517]									VOL					WR [517]	42.3	4.15		14.62		5.18	9.64		11.28	8.04	0.15		1.74	2.5		0.15
[517]	OCEAN ISLAND	TRISTAN DA CUNHA GROUP / TRISTAN DA CUNHA		-37.1	-37.2	-12.2	-12.3	SAE			s_TC-49 [517]	TRACHYANDESITE [517]									VOL					WR [517]	51.3	2.38		18.63		2.89	5.02		5.62	3.66	0.18		4.02	5.22		0.58
[537]	OCEAN ISLAND	TRISTAN DA CUNHA GROUP / TRISTAN DA CUNHA	EASTEND OF SANDY POINT GULCH	-37.05	-37.05	-12.3	-12.3	SAE	15	15	s_109 [537]	GABBRO [537]								GRANULAR TO GABBROIC [537]	PLU			F		WR [537]	34.9	5.5		17.8		15.7	1.5		12.9	9	0.3		0.8	1.9								0.3
[537]	OCEAN ISLAND	TRISTAN DA CUNHA GROUP / TRISTAN DA CUNHA	GIPSY GULCH, 12M BELOW THE CATTLE CROSSING	-37.05	-37.05	-12.3	-12.3	SAE			s_248 [537]	GABBRO [537]								GRANULAR TO GABBROIC [537]	PLU			F		WR [537]	37.5	4.6		16		11.1	4.3		15.9	7.7	0.1		0.5	1.5			0.1					0.2
[537]	OCEAN ISLAND	TRISTAN DA CUNHA GROUP / TRISTAN DA CUNHA	SANDY POINT	-37.05	-37.05	-12.3	-12.3	SAE			s_AX [537]	GABBRO, AUGITE [537]									PLU					WR [537]	35.7	5.13		10.45		10	9.54		16.32	9.75	0.12		0.14	1.53	0.05		0.61
[537]	OCEAN ISLAND	TRISTAN DA CUNHA GROUP / TRISTAN DA CUNHA	SANDY POINT	-37.05	-37.05	-12.3	-12.3	SAE			s_HX [537]	GABBRO, HORNBLENDE [537]									PLU					WR [537]	36.76	4.88		16.18		13.13	3.87		14.98	7.5	0.06		0.33	1.59	0.02		0.83
[537]	OCEAN ISLAND	TRISTAN DA CUNHA GROUP / TRISTAN DA CUNHA	HALF WAY BEACH	-37.05	-37.05	-12.3	-12.3	SAE			s_BX [537]	GABBRO, PLAGIOCLASE-BIOTITE [537]									PLU					WR [537]	40.76	3.56		19.19		7.62	2.29		14.07	6.05	0.03		1.36	2.42	1.99		0.7
[507]	OCEAN ISLAND	TRISTAN DA CUNHA GROUP / TRISTAN DA CUNHA		-37.1	-37.2	-12.2	-12.3	SAE			s_T117 [507]	TRACHYBASALT [507]									VOL					WR [507]													2.81	4.72
[507]	OCEAN ISLAND	TRISTAN DA CUNHA GROUP / TRISTAN DA CUNHA		-37.1	-37.2	-12.2	-12.3	SAE			s_T627 [507]	TRACHYANDESITE [507]							1961		VOL					WR [507]
[1291]	OCEAN ISLAND	TRISTAN DA CUNHA GROUP / TRISTAN DA CUNHA		-37.1	-37.2	-12.2	-12.3	SAE			s_125 [1291]	TRACHYBASALT, LEUCITE [1291]									VOL					WR [1291]	49.52	3.18		17.72		2.55	5.66		7.58	3.42	0.18		3.88	4.94	1.09		0.29	0.15
[1291]	OCEAN ISLAND	TRISTAN DA CUNHA GROUP / TRISTAN DA CUNHA		-37.1	-37.2	-12.2	-12.3	SAE			s_572 [1291]	TRACHYANDESITE [1291]								PORPHYRITIC [1291]	VOL					WR [1291]	54.1	1.7		20		2	3.3		5.2	1.8	0.2		5.6	6.1	0.3		0.2	0.3
[6857]	OCEAN ISLAND	TRISTAN DA CUNHA GROUP / TRISTAN DA CUNHA	STONY BEACH	-37.05	-37.05	-12.3	-12.3	SAE			s_11897 [6857]	PHONOLITE, TEPHRI [6857]									VOL					WR [6857]	52.89	1.73		18.79				5.86	5.9	1.62	0.18		4.46	5.29	0.44
[6857]	OCEAN ISLAND	TRISTAN DA CUNHA GROUP / TRISTAN DA CUNHA	NEAR BIG POINT, FLOW D	-37.05	-37.05	-12.3	-12.3	SAE	0.305	0.305	s_11898 [6857]	BASANITE [6857]									VOL					WR [6857]	43.11	3.95		14.89				12.3	10.74	6.71	0.17		2.22	2.85	0.67
[6857]	OCEAN ISLAND	TRISTAN DA CUNHA GROUP / TRISTAN DA CUNHA	FLOW H, SEASHORE BELOW SETTLEMENT AND EAST OF HERALD POINT	-37.05	-37.05	-12.3	-12.3	SAE			s_11900 [6857]	TEPHRITE [6857]									VOL					WR [6857]	45.78	3.33		16.3				10.94	9.26	4.36	0.19		3.18	3.93	0.95
[6857]	OCEAN ISLAND	TRISTAN DA CUNHA GROUP / INACCESSIBLE	FROM BEHIND HUTS AT LANDING LOCATION,. NEAR THE WATERFALL	-37.32	-37.32	-12.73	-12.73	SAE	22.86	22.86	s_11902 [6857]	TRACHYBASALT [6857]									VOL					WR [6857]	47.28	3.02		16.27				9.68	9.2	4.4	0.14		2	3.22	0.42
[6857]	OCEAN ISLAND	TRISTAN DA CUNHA GROUP / TRISTAN DA CUNHA	SEAWARD MARGIN OF FLOW G, 100 YARDS FROM EXTREME WESTERN LIMIT OF FLOW	-37.05	-37.05	-12.3	-12.3	SAE	3.05	3.05	s_11903 [6857]	PHONOLITE, TEPHRI [6857]							1961		VOL					WR [6857]	55.04	1.58		19.01				5.04	5.16	1.29	0.17		4.99	5.8	0.31
[9391][24718][15598][14579]	OCEAN ISLAND	TRISTAN DA CUNHA GROUP / TRISTAN DA CUNHA		-37.1	-37.2	-12.2	-12.3	SAE			s_T 16 [9391] / s_T16-TE13 [24718]	TEPHRITE [9391] / BASALT, ALKALINE [24718]									VOL					WR [9391]	43.9	3.69		16.4		1.81	9.25	10.9	10.26	4.74	0.18		2.92	3.27	1.14
[9391][15598][14579]	OCEAN ISLAND	TRISTAN DA CUNHA GROUP / TRISTAN DA CUNHA		-37.1	-37.2	-12.2	-12.3	SAE			s_T 20 [9391]	TEPHRITE [9391] / BASALT, ALKALINE [15598]									VOL					WR [9391]	46	3.26		16.4		1.8	9.17	10.8	9.4	4.43	0.18		3.05	3.75	0.91
[9391][15598][14579]	OCEAN ISLAND	TRISTAN DA CUNHA GROUP / TRISTAN DA CUNHA		-37.1	-37.2	-12.2	-12.3	SAE			s_T 39 [9391]	BASANITE [9391] / BASALT, ALKALINE [15598]									VOL					WR [9391]	41.5	4.12		13.6		2.39	12.2	14.3	11.62	7.45	0.16		1.04	2.47	0.65
[9391][24718][15598][14579]	OCEAN ISLAND	TRISTAN DA CUNHA GROUP / TRISTAN DA CUNHA		-37.1	-37.2	-12.2	-12.3	SAE			s_T 60 [9391] / s_T60-TE14 [24718]	BASALT, PICRITIC [9391] / BASALT, ALKALINE [24718]									VOL					WR [9391]	40.6	3.7		10.5		2.57	13.1	15.4	13.7	12.2	0.16		0.83	1.45	0.26
[9391][24718][15598][14579]	OCEAN ISLAND	TRISTAN DA CUNHA GROUP / TRISTAN DA CUNHA		-37.1	-37.2	-12.2	-12.3	SAE			s_T 64 [9391] / s_T64-TE15 [24718]	BASANITE [9391] / BASALT, ALKALINE [24718]									VOL					WR [9391]	42.1	3.87		13.2		2.15	11	12.9	11.89	8.91	0.16		1.62	2.45	0.89
[9391][15598][14579]	OCEAN ISLAND	TRISTAN DA CUNHA GROUP / TRISTAN DA CUNHA		-37.1	-37.2	-12.2	-12.3	SAE			s_T 112 [9391]	BASANITE [9391] / BASALT, ALKALINE [15598]									VOL					WR [9391]	43.3	3.8		14.6		2.14	10.9	12.8	11.61	6.61	0.16		1.9	2.87	0.58
[9391][15598][14579]	OCEAN ISLAND	TRISTAN DA CUNHA GROUP / TRISTAN DA CUNHA		-37.1	-37.2	-12.2	-12.3	SAE			s_T 120 [9391]	BASANITE [9391] / BASALT, ALKALINE [15598]									VOL					WR [9391]	44	3.68		15.4		2.05	10.5	12.3	10.22	5.75	0.17		2.41	3.11	0.68
[9391][24718][15598][14579]	OCEAN ISLAND	TRISTAN DA CUNHA GROUP / TRISTAN DA CUNHA		-37.1	-37.2	-12.2	-12.3	SAE			s_T 122 [9391] / s_T122-TE16 [24718]	BASANITE [9391] / BASALT, ALKALINE [24718]									VOL					WR [9391]	42.9	3.8		13.4		2.41	12.3	14.4	11.49	7.28	0.17		1.74	2.23	0.46
[9391][15598][14579]	OCEAN ISLAND	TRISTAN DA CUNHA GROUP / TRISTAN DA CUNHA		-37.1	-37.2	-12.2	-12.3	SAE			s_T 129 [9391]	BASANITE [9391] / BASALT, ALKALINE [15598]									VOL					WR [9391]	42.4	3.81		13.7		2.38	12.1	14.3	10.86	7.94	0.16		1.96	2.56	0.46
[9391][15598][14579]	OCEAN ISLAND	TRISTAN DA CUNHA GROUP / TRISTAN DA CUNHA		-37.1	-37.2	-12.2	-12.3	SAE			s_T 167 [9391]	BASANITE [9391] / BASALT, ALKALINE [15598]									VOL					WR [9391]	42.4	3.83		14.1		2.14	10.9	12.8	11.51	7.78	0.16		2.08	2.64	0.74
[9391][15598][14579]	OCEAN ISLAND	TRISTAN DA CUNHA GROUP / TRISTAN DA CUNHA		-37.1	-37.2	-12.2	-12.3	SAE			s_T 170 [9391]	BASANITE [9391] / BASALT, ALKALINE [15598]									VOL					WR [9391]	43.3	3.79		15.7		2.01	10.2	12	10.67	5.51	0.18		2.56	3.31	1
[9391][15598][14579]	OCEAN ISLAND	TRISTAN DA CUNHA GROUP / TRISTAN DA CUNHA		-37.1	-37.2	-12.2	-12.3	SAE			s_T 186 [9391]	BASANITE [9391] / BASALT, ALKALINE [15598]									VOL					WR [9391]	41.6	4.1		13.4		2.39	12.2	14.4	12.58	6.88	0.17		1.65	2.67	0.43
[9391][15598][14579]	OCEAN ISLAND	TRISTAN DA CUNHA GROUP / TRISTAN DA CUNHA		-37.1	-37.2	-12.2	-12.3	SAE			s_T 342 [9391]	BASANITE [9391] / BASALT, ALKALINE [15598]									VOL					WR [9391]	45	3.73		16.3		1.8	9.19	10.8	9.92	5	0.16		2.59	3.47	1.11
[9391][15598][14579]	OCEAN ISLAND	TRISTAN DA CUNHA GROUP / TRISTAN DA CUNHA		-37.1	-37.2	-12.2	-12.3	SAE			s_T 349 [9391]	BASANITE [9391] / BASALT, ALKALINE [15598]									VOL					WR [9391]	40.6	4.09		14.2		2.24	11.4	13.5	11.14	7.75	0.16		1.55	2.18	0.83
[9391][15598][14579]	OCEAN ISLAND	TRISTAN DA CUNHA GROUP / TRISTAN DA CUNHA		-37.1	-37.2	-12.2	-12.3	SAE			s_T 359 [9391]	TEPHRITE [9391] / BASALT, ALKALINE [15598]									VOL					WR [9391]	45.3	3.6		16.5		1.82	9.26	10.9	10.02	4.94	0.17		2.76	3.53	0.74
[9391][15598][14579]	OCEAN ISLAND	TRISTAN DA CUNHA GROUP / TRISTAN DA CUNHA		-37.1	-37.2	-12.2	-12.3	SAE			s_T 482 [9391]	BASANITE [9391] / BASALT, ALKALINE [15598]									VOL					WR [9391]	43.1	3.89		14.4		2.12	10.8	12.7	11.07	6.94	0.17		2.13	3	0.68
[9391][24718][15598][14579]	OCEAN ISLAND	TRISTAN DA CUNHA GROUP / TRISTAN DA CUNHA		-37.1	-37.2	-12.2	-12.3	SAE			s_T 497 [9391] / s_T497-TE17 [24718]	BASANITE [9391] / BASALT, ALKALINE [24718]									VOL					WR [9391]	43.3	3.6		14		2.05	10.5	12.3	11.42	7.61	0.16		2.24	3.12	0.73
[9391][15598][14579]	OCEAN ISLAND	TRISTAN DA CUNHA GROUP / TRISTAN DA CUNHA		-37.1	-37.2	-12.2	-12.3	SAE			s_T 499 [9391]	TEPHRITE [9391] / BASALT, ALKALINE [15598]									VOL					WR [9391]	46.5	2.88		16.8		1.67	8.53	10	9.08	3.55	0.19		3.39	4.45	0.92
[9391][15598][14579]	OCEAN ISLAND	TRISTAN DA CUNHA GROUP / TRISTAN DA CUNHA		-37.1	-37.2	-12.2	-12.3	SAE			s_T 505 [9391]	BASANITE [9391] / BASALT, ALKALINE [15598]									VOL					WR [9391]	43.7	3.72		15.8		1.96	9.97	11.7	10.37	5.43	0.18		2.58	3.35	1.22
[9391][15598][14579]	OCEAN ISLAND	TRISTAN DA CUNHA GROUP / TRISTAN DA CUNHA		-37.1	-37.2	-12.2	-12.3	SAE			s_T 526 [9391]	BASANITE [9391] / BASALT, ALKALINE [15598]									VOL					WR [9391]	41.6	3.94		15.9		2.1	10.7	12.6	10.66	5.45	0.18		2.03	2.69	0.91
[9391][15598][14579]	OCEAN ISLAND	TRISTAN DA CUNHA GROUP / TRISTAN DA CUNHA		-37.1	-37.2	-12.2	-12.3	SAE			s_T 529 [9391]	BASANITE [9391] / BASALT, ALKALINE [15598]									VOL					WR [9391]	44	3.69		16.3		1.94	9.88	11.6	10.12	4.88	0.18		2.58	3.37	1
[9391][15598][14579]	OCEAN ISLAND	TRISTAN DA CUNHA GROUP / TRISTAN DA CUNHA		-37.1	-37.2	-12.2	-12.3	SAE			s_T 555 [9391]	BASANITE [9391] / BASALT, ALKALINE [15598]									VOL					WR [9391]	41.3	4.05		14.1		2.27	11.6	13.6	11.94	7.67	0.17		1.7	2.22	0.61
[9391][24718][15598][14579]	OCEAN ISLAND	TRISTAN DA CUNHA GROUP / TRISTAN DA CUNHA		-37.1	-37.2	-12.2	-12.3	SAE			s_T 557 [9391] / s_T557-TE18 [24718]	BASANITE [9391] / BASALT, ALKALINE [24718]									VOL					WR [9391]	42.1	3.93		13.5		2.23	11.4	13.4	11.96	8	0.17		1.63	2.56	0.57
[9391][15598][14579]	OCEAN ISLAND	TRISTAN DA CUNHA GROUP / TRISTAN DA CUNHA		-37.1	-37.2	-12.2	-12.3	SAE			s_T 562 [9391]	BASANITE [9391] / BASALT, ALKALINE [15598]									VOL					WR [9391]	42	4.12		15		2.16	11	13	11.56	6.3	0.17		2.53	3.02	0.61
[9391][15598][14579]	OCEAN ISLAND	TRISTAN DA CUNHA GROUP / TRISTAN DA CUNHA		-37.1	-37.2	-12.2	-12.3	SAE			s_T 564 [9391]	BASANITE [9391] / BASALT, ALKALINE [15598]									VOL					WR [9391]	44.4	3.65		15.5		2.03	10.4	12.2	10.22	5.6	0.17		2.39	3.51	0.7
[9391][15598][14579]	OCEAN ISLAND	TRISTAN DA CUNHA GROUP / TRISTAN DA CUNHA		-37.1	-37.2	-12.2	-12.3	SAE			s_T 568 [9391]	BASANITE [9391] / BASALT, ALKALINE [15598]									VOL					WR [9391]	44.1	3.66		15.5		2.03	10.4	12.2	10.18	5.62	0.17		2.26	3.41	0.71
[9391][15598][14579]	OCEAN ISLAND	TRISTAN DA CUNHA GROUP / TRISTAN DA CUNHA		-37.1	-37.2	-12.2	-12.3	SAE			s_T 619 [9391]	TEPHRITE [9391] / BASALT, ALKALINE [15598]									VOL					WR [9391]	46	3.15		17.1		1.6	8.14	9.6	9	4.28	0.17		3.24	4.15	1.11
[23527]	OCEAN ISLAND	TRISTAN DA CUNHA GROUP / TRISTAN DA CUNHA		-37.1	-37.2	-12.2	-12.3	SAE			s_BM 1962 128 (112) [23527]	BASALT [23527]									VOL					WR [23527]	44.6592	3.69539		15.0677		13.0025			11.4426	6.46154	0.174938		1.77425	2.82557	0.618056		0.0156482
[23592]	OCEAN ISLAND	TRISTAN DA CUNHA GROUP / TRISTAN DA CUNHA		-37.1	-37.2	-12.2	-12.3	SAE			s_110014 [23592]	BASALT [23592]									VOL					WR [23592]
[23592]	OCEAN ISLAND	TRISTAN DA CUNHA GROUP / TRISTAN DA CUNHA		-37.1	-37.2	-12.2	-12.3	SAE			s_110020 [23592]	BASALT [23592]									VOL					WR [23592]
[24778]	OCEAN ISLAND	TRISTAN DA CUNHA GROUP / TRISTAN DA CUNHA		-37.1	-37.2	-12.2	-12.3	SAQ			s_BURNT WOODS [24778]	BASALT [24778]									VOL					WR [24778]
[24778]	OCEAN ISLAND	TRISTAN DA CUNHA GROUP / TRISTAN DA CUNHA		-37.1	-37.2	-12.2	-12.3	SAQ			s_TRISTANT-BLOCK3-01 [24778]	BASALT [24778]									VOL					GL [24778]	47.5465	2.88723		16.7355				9.9347	8.6202	4.66057	0.187333		3.9651	3.66537	1.00107	0.122351
[24778]	OCEAN ISLAND	TRISTAN DA CUNHA GROUP / TRISTAN DA CUNHA		-37.1	-37.2	-12.2	-12.3	SAQ			s_TRISTANT-BLOCK3-02 [24778]	BASALT [24778]									VOL					GL [24778]	47.253	3.12047		16.518				9.78537	9.79693	3.96583	0.185033		3.8322	3.49493	0.9805	0.0924424
[24778]	OCEAN ISLAND	TRISTAN DA CUNHA GROUP / TRISTAN DA CUNHA		-37.1	-37.2	-12.2	-12.3	SAQ			s_TRISTANT-BLOCK3-03 [24778]	BASALT [24778]									VOL					GL [24778]	47.1414	2.87693		15.8938				10.5	8.9702	6.10363	0.1906		3.60923	3.47843	0.984967	0.0978058
[24778]	OCEAN ISLAND	TRISTAN DA CUNHA GROUP / TRISTAN DA CUNHA		-37.1	-37.2	-12.2	-12.3	SAQ			s_TRISTAN_BW_201 [24778]	BASALT [24778]									VOL					GL [24778]	47.3081	2.964		17.0933				10.0886	8.79615	3.5571	0.1815		4.1416	3.63545	1.0206	0.172592
[24778]	OCEAN ISLAND	TRISTAN DA CUNHA GROUP / TRISTAN DA CUNHA		-37.1	-37.2	-12.2	-12.3	SAQ			s_TRISTAN_BW_202 [24778]	BASALT [24778]									VOL					GL [24778]	48.1956	2.99793		17.4834				9.91807	9.4023	3.67453	0.1805		3.98447	3.0627	1.00293	0.0908296
[24778]	OCEAN ISLAND	TRISTAN DA CUNHA GROUP / TRISTAN DA CUNHA		-37.1	-37.2	-12.2	-12.3	SAQ			s_TRISTAN_BW_203 [24778]	BASALT [24778]									VOL					GL [24778]	48.0819	2.97005		17.3311				9.57485	8.87205	3.56575	0.17805		4.15095	3.35165	1.05825	0.0906417
[1291]	OCEAN ISLAND	TRISTAN DA CUNHA GROUP / TRISTAN DA CUNHA		-37.1	-37.2	-12.2	-12.3	SAE			s_114 [1291]	ANKARAMITE [1291]									VOL					WR [1291]	42.93	3.73		12.05		5.58	8.27		12.58	10.28	0.16		1.47	2.36	0.59		0.15	0.11
[1291]	OCEAN ISLAND	TRISTAN DA CUNHA GROUP / TRISTAN DA CUNHA		-37.1	-37.2	-12.2	-12.3	SAE			s_62.1 [1291]	BASALT, OLIVINE [1291]									VOL					WR [1291]	42.51	4.29		12.82		4.89	8.64		12.22	9.63	0.13		1.4	2.83	0.38		0.41	0.05
[1291]	OCEAN ISLAND	TRISTAN DA CUNHA GROUP / TRISTAN DA CUNHA		-37.1	-37.2	-12.2	-12.3	SAE			s_6 [1291]	BASALT, ALKALINE, OLIVINE [1291]									VOL					WR [1291]	42.43	4.11		14.15		5.84	8.48		11.91	6.71	0.17		2.04	2.77	0.58		0.34	0.44
[1291]	OCEAN ISLAND	TRISTAN DA CUNHA GROUP / TRISTAN DA CUNHA		-37.1	-37.2	-12.2	-12.3	SAE			s_64.4 [1291]	TRACHYBASALT [1291]									VOL					WR [1291]	46.31	3.64		17.36		3.27	8.12		9.74	4.64	0.17		2.79	3.67	0		0.21	0.08
[1291]	OCEAN ISLAND	TRISTAN DA CUNHA GROUP / TRISTAN DA CUNHA		-37.1	-37.2	-12.2	-12.3	SAE			s_504 [1291]	TRACHYBASALT [1291]									VOL					WR [1291]	45.5	3.3		18.3		2.5	8.4		10	4.6	0.1		3	4.2	0.3		0.1	0.2
[1291]	OCEAN ISLAND	TRISTAN DA CUNHA GROUP / TRISTAN DA CUNHA		-37.1	-37.2	-12.2	-12.3	SAE			s_64.3 [1291]	TRACHYBASALT [1291]									VOL					WR [1291]	47.44	4.02		17.17		3.1	7.07		9.78	4.65	0.14		2.95	3.71	0		0.28	0.11
[1291]	OCEAN ISLAND	TRISTAN DA CUNHA GROUP / TRISTAN DA CUNHA		-37.1	-37.2	-12.2	-12.3	SAE			s_364 [1291]	TRACHYBASALT [1291]									VOL					WR [1291]	45.7	3.65		16.7		3.73	7.28		9.91	4.89	0.17		3.1	3.96	0.84		0.09	0.12
[1291]	OCEAN ISLAND	TRISTAN DA CUNHA GROUP / TRISTAN DA CUNHA		-37.1	-37.2	-12.2	-12.3	SAE			s_20 [1291]	TRACHYBASALT [1291]									VOL					WR [1291]	46.48	3.1		16.68		4.12	7.3		9.4	4.65	0.18		3.07	3.8	0.9		0.57	0.07
[1291]	OCEAN ISLAND	TRISTAN DA CUNHA GROUP / TRISTAN DA CUNHA		-37.1	-37.2	-12.2	-12.3	SAE			s_21 [1291]	TRACHYBASALT [1291]									VOL					WR [1291]	46	2.83		17.03		3.79	7.47		9.54	4.8	0.23		3.11	4.04	1.06		0.09	0.02
[1291]	OCEAN ISLAND	TRISTAN DA CUNHA GROUP / TRISTAN DA CUNHA		-37.1	-37.2	-12.2	-12.3	SAE			s_369 [1291]	TRACHYBASALT [1291]									VOL					WR [1291]	46.01	2.19		16.84		7.61	5.37		9.36	4.75	0.18		2.72	3.74	1.18		0.01	0.08
[1291]	OCEAN ISLAND	TRISTAN DA CUNHA GROUP / TRISTAN DA CUNHA		-37.1	-37.2	-12.2	-12.3	SAE			s_64.2 [1291]	BASALT, OLIVINE [1291]									VOL					WR [1291]	46.24	4.48		15.75		3.04	7.39		9.57	4.92	0.14		2.6	4.12	1.2		0.29	0.05
[1291]	OCEAN ISLAND	TRISTAN DA CUNHA GROUP / TRISTAN DA CUNHA		-37.1	-37.2	-12.2	-12.3	SAE			s_117 [1291]	TRACHYBASALT [1291]									VOL					WR [1291]	45.96	3.44		17.84		4.53	6.21		9.61	4.13	0.2		3.16	4.27	0.52		0.17	0.05
[1291]	OCEAN ISLAND	TRISTAN DA CUNHA GROUP / TRISTAN DA CUNHA		-37.1	-37.2	-12.2	-12.3	SAE			s_619 [1291]	TRACHYBASALT [1291]									VOL					WR [1291]	46.2	3.5		18.1		3.1	6.7		9.4	4.6	0.2		3.3	4.7	0.5		0.2
[1291]	OCEAN ISLAND	TRISTAN DA CUNHA GROUP / TRISTAN DA CUNHA		-37.1	-37.2	-12.2	-12.3	SAE			s_351 [1291]	TRACHYBASALT, LEUCITE [1291]									VOL					WR [1291]	47.06	3.44		17.14		3.29	6.65		9	4.35	0.18		3.4	4.08	0.75		0.37	0.27
[1291]	OCEAN ISLAND	TRISTAN DA CUNHA GROUP / TRISTAN DA CUNHA		-37.1	-37.2	-12.2	-12.3	SAE			s_194 [1291]	TRACHYBASALT, LEUCITE [1291]									VOL					WR [1291]	48.54	2.98		18		3.78	5.18		8.49	3.32	0.18		3.38	4.74	1.18		0.14	0.03
[1291]	OCEAN ISLAND	TRISTAN DA CUNHA GROUP / TRISTAN DA CUNHA		-37.1	-37.2	-12.2	-12.3	SAE			s_74.2 [1291]	TRACHYBASALT [1291]									VOL					WR [1291]	50.02	3.39		19.58		2.29	5.24		6.32	3.15	0.12		3.71	5.15	1.02		0.21	0
[1291]	OCEAN ISLAND	TRISTAN DA CUNHA GROUP / TRISTAN DA CUNHA		-37.1	-37.2	-12.2	-12.3	SAE			s_230 [1291]	TRACHYANDESITE [1291]									VOL					WR [1291]	53.9	1.77		19		3.37	3.05		6.25	1.68	0.18		4.53	5.04	0.74		0.19	0.28
[1291]	OCEAN ISLAND	TRISTAN DA CUNHA GROUP / TRISTAN DA CUNHA		-37.1	-37.2	-12.2	-12.3	SAE			s_232 [1291]	TRACHYANDESITE [1291]									VOL					WR [1291]	54.04	1.81		19.54		2.6	3.35		6.22	1.66	0.19		4.53	5.26	0.75		0.11	0.19
[1291]	OCEAN ISLAND	TRISTAN DA CUNHA GROUP / TRISTAN DA CUNHA		-37.1	-37.2	-12.2	-12.3	SAE			s_80.1 [1291]	TRACHYANDESITE [1291]									VOL					WR [1291]	54.43	1.82		18.23		3.24	2.66		5.83	1.52	0.09		4.71	5.64	0.42		1.55	0
[1291]	OCEAN ISLAND	TRISTAN DA CUNHA GROUP / TRISTAN DA CUNHA		-37.1	-37.2	-12.2	-12.3	SAE			s_657 [1291]	TRACHYANDESITE [1291]									VOL					WR [1291]	54.95	1.58		19.63		1.62	3.31		5.73	1.42	0.18		4.95	5.89	0.43		0	0.01				0.08	0.27
[1291]	OCEAN ISLAND	TRISTAN DA CUNHA GROUP / TRISTAN DA CUNHA		-37.1	-37.2	-12.2	-12.3	SAE			s_518 [1291]	TRACHYANDESITE [1291]									VOL					WR [1291]	54.53	1.62		19.35		4.85	1.2		5.76	1.5	0.18		4.83	5.84	0.38		0	0.02				0.12	0.11
[1291]	OCEAN ISLAND	TRISTAN DA CUNHA GROUP / TRISTAN DA CUNHA		-37.1	-37.2	-12.2	-12.3	SAE			s_617 [1291]	TRACHYANDESITE [1291]									VOL					WR [1291]	54.76	1.62		19.06		3.15	2.95		5.6	1.51	0.18		4.89	5.87	0.36		0.03	0.03				0.1	0.13
[1291]	OCEAN ISLAND	TRISTAN DA CUNHA GROUP / TRISTAN DA CUNHA		-37.1	-37.2	-12.2	-12.3	SAE			s_627 [1291]	TRACHYANDESITE [1291]									VOL					WR [1291]	54.66	1.6		19.91		3.07	2.73		5.56	1.1	0.18		5.03	5.85	0.29		0	0				0.1	0.23
[1291]	OCEAN ISLAND	TRISTAN DA CUNHA GROUP / TRISTAN DA CUNHA		-37.1	-37.2	-12.2	-12.3	SAE			s_80.5 [1291]	TRACHYANDESITE [1291]									VOL					WR [1291]	54.35	2.18		19.97		1.52	3.15		4.52	1.35	0.24		4.53	6.71	0.89		0.38	0.04
[1291]	OCEAN ISLAND	TRISTAN DA CUNHA GROUP / TRISTAN DA CUNHA		-37.1	-37.2	-12.2	-12.3	SAE			s_86.3 [1291]	TRACHYTE, SODALITE-PLAGIOCLASE [1291]									VOL					WR [1291]	58.2	1.33		19.1		2.24	1.28		3.58	0.81	0.08		5.94	6.3	0.21		0.9	0.13					0.06
[1291]	OCEAN ISLAND	TRISTAN DA CUNHA GROUP / TRISTAN DA CUNHA		-37.1	-37.2	-12.2	-12.3	SAE			s_30 [1291]	TRACHYTE, PHONOLITIC [1291]									VOL					WR [1291]	59.6	0.5		19.6		2.4	0.1		1.3	0.4	0.2		6.6	5.7	0.05		2.3	1.3
[1291]	OCEAN ISLAND	TRISTAN DA CUNHA GROUP / TRISTAN DA CUNHA		-37.1	-37.2	-12.2	-12.3	SAE			s_31 [1291]	TRACHYTE, ALKALI FELDSPAR [1291]									VOL					WR [1291]	60.7	0.5		20.5		2.3	0.4		1.4	0.2	0.2		6.7	6.2	0.03		1	0.4
[1291]	OCEAN ISLAND	TRISTAN DA CUNHA GROUP / TRISTAN DA CUNHA		-37.1	-37.2	-12.2	-12.3	SAE			s_86.5 [1291]	TRACHYTE, SODALITE [1291]									VOL					WR [1291]	58.71	0.39		20.03		2.16	0.45		0.98	0	0.1		6.03	7.56	0.06		3.19	0.22					0.32
[1291]	OCEAN ISLAND	TRISTAN DA CUNHA GROUP / NIGHTINGALE		-37	-37	-12	-12	SAE			s_1713.4 [1291]	TRACHYANDESITE [1291]									VOL					WR [1291]	48.09	4.38		19.05		3.44	5.59		9.42	3.5	0		2.88	5.06	0		0.67	0
[1291]	OCEAN ISLAND	TRISTAN DA CUNHA GROUP / NIGHTINGALE		-37	-37	-12	-12	SAE			s_401 [1291]	TRACHYBASALT [1291]									VOL					WR [1291]	48.59	2.61		17.78		2.64	5.12		8.08	3.53	0.17		3.27	4.13	0.87		1.86	1.3
[1291]	OCEAN ISLAND	TRISTAN DA CUNHA GROUP / NIGHTINGALE		-37	-37	-12	-12	SAE			s_74.1 [1291]	TRACHYBASALT [1291]									VOL					WR [1291]	48.76	2.93		15.1		4.23	5.27		7.45	3.54	0.07		3.96	4.43	0.83		3.11	0.43
[1291]	OCEAN ISLAND	TRISTAN DA CUNHA GROUP / NIGHTINGALE		-37	-37	-12	-12	SAE			s_74.3 [1291]	TRACHYBASALT [1291]									VOL					WR [1291]	50.64	2.5		21.75		0.19	5.93		6.88	2.56	0.07		3.73	5.27	0		0.44	0.31
[1291]	OCEAN ISLAND	TRISTAN DA CUNHA GROUP / NIGHTINGALE		-37	-37	-12	-12	SAE			s_74.4 [1291]	TRACHYBASALT [1291]									VOL					WR [1291]	52.13	2		20.48		3.81	2.2		5.55	1.96	0.07		3.75	3.92	0		2.21	1.96
[1291]	OCEAN ISLAND	TRISTAN DA CUNHA GROUP / NIGHTINGALE		-37	-37	-12	-12	SAE			s_80.4 [1291]	TRACHYANDESITE [1291]									VOL					WR [1291]	54.4	2.38		17.34		3.04	3.69		4.94	2.5	0.07		4.73	5.11	0.69		1.11	0
[1291]	OCEAN ISLAND	TRISTAN DA CUNHA GROUP / NIGHTINGALE		-37	-37	-12	-12	SAE			s_80.6 [1291]	TRACHYTE, TEPHRITIC [1291]									VOL					WR [1291]	57.1	1.11		21.05		1.76	2.01		4.13	1.2	0.11		5.33	5.01	0		0.97	0.43
[1291]	OCEAN ISLAND	TRISTAN DA CUNHA GROUP / NIGHTINGALE		-37	-37	-12	-12	SAE			s_412 [1291]	TRACHYANDESITE [1291]									VOL					WR [1291]	57.31	1.59		17.01		6.47	0.28		3.71	2.05	0.12		5.17	5.38	0.52		0.1	0.28
[1291]	OCEAN ISLAND	TRISTAN DA CUNHA GROUP / NIGHTINGALE		-37	-37	-12	-12	SAE			s_420 [1291]	TRACHYTE, PLAGIOCLASE [1291]									VOL					WR [1291]	58.07	1.25		18.01		2.92	2.3		3.15	1.15	0.13		6.02	6	0.43		0.28	0.38
[1291]	OCEAN ISLAND	TRISTAN DA CUNHA GROUP / NIGHTINGALE		-37	-37	-12	-12	SAE			s_86.1 [1291]	TRACHYTE, BIOTITE [1291]									VOL					WR [1291]	59.91	1.21		18.44		2.88	1.2		2.73	0.97	0.07		5.83	6.05	0.22		0.3	0.16
[1291]	OCEAN ISLAND	TRISTAN DA CUNHA GROUP / NIGHTINGALE		-37	-37	-12	-12	SAE			s_86.4 [1291]	TRACHYTE, SODALITE [1291]									VOL					WR [1291]	62.23	0.65		18.43		1.68	0.6		1.16	0.11	0.12		6.28	6.77	0.07		1.6	0.06					0.32
[1291]	OCEAN ISLAND	TRISTAN DA CUNHA GROUP / INACCESSIBLE		-37.32	-37.32	-12.73	-12.73	SAE			s_88.1 [1291]	GABBRO [1291]									PLU					WR [1291]	48.11	3.27		14.29		2.01	7.63		9.71	10.13	0.15		0.98	2.92	0.31		0.46	0.09
[1291]	OCEAN ISLAND	TRISTAN DA CUNHA GROUP / INACCESSIBLE		-37.32	-37.32	-12.73	-12.73	SAE			s_466 [1291]	TRACHYBASALT [1291]									VOL					WR [1291]	46.4	2.6		17.7		3.3	7.2		9.3	5.8	0.2		2.6	3.9	0.2		0.8	0.9
[1291]	OCEAN ISLAND	TRISTAN DA CUNHA GROUP / INACCESSIBLE		-37.32	-37.32	-12.73	-12.73	SAE			s_64.1 [1291]	BASALT, OLIVINE [1291]									VOL					WR [1291]	47.76	3.05		15.68		3.34	6.55		9.02	6.05	0.07		1.94	4.22	0.49		1.87	0
[1291]	OCEAN ISLAND	TRISTAN DA CUNHA GROUP / INACCESSIBLE		-37.32	-37.32	-12.73	-12.73	SAE			s_70.3 [1291]	MUGEARITE [1291]									VOL					WR [1291]	49.3	3.18		16.36		3.69	5.94		7.4	5.31	0.16		1.71	4.09	0.49		1.67	0.49
[1291]	OCEAN ISLAND	TRISTAN DA CUNHA GROUP / INACCESSIBLE		-37.32	-37.32	-12.73	-12.73	SAE			s_70.1 [1291]	MUGEARITE [1291]									VOL					WR [1291]	49.3	2.02		18.85		4.37	5.8		7.66	3.95			2.65	3.89	0.64		0.45	0.3
[1291]	OCEAN ISLAND	TRISTAN DA CUNHA GROUP / INACCESSIBLE		-37.32	-37.32	-12.73	-12.73	SAE			s_70.2 [1291]	MUGEARITE [1291]									VOL					WR [1291]	48.1	2.6		19.39		8.02	3.03		4.61	2.91	0.13		2.56	4.81	0		1.87	2.08
[1291]	OCEAN ISLAND	TRISTAN DA CUNHA GROUP / INACCESSIBLE		-37.32	-37.32	-12.73	-12.73	SAE			s_80.2 [1291]	TRACHYANDESITE [1291]									VOL					WR [1291]	55.51	2.12		18.2		3.04	4.03		4.67	2.05	0.13		3.15	5.43	0.56		0.56	0.25
[1291]	OCEAN ISLAND	TRISTAN DA CUNHA GROUP / INACCESSIBLE		-37.32	-37.32	-12.73	-12.73	SAE			s_80.3 [1291]	TRACHYANDESITE [1291]									VOL					WR [1291]	54.94	2.18		17.69		2.97	3.29		4.73	2.87	0.12		3.76	5.05	0.62		1.03	0.47
[1291]	OCEAN ISLAND	TRISTAN DA CUNHA GROUP / INACCESSIBLE		-37.32	-37.32	-12.73	-12.73	SAE			s_86.2 [1291]	TRACHYTE, BIOTITE [1291]									VOL					WR [1291]	62.36	0.72		18.99		1.76	0.87		1.78	0.78	0.04		5.01	6.3	0.21		0.63	0.24
[482]	OCEAN ISLAND	TRISTAN DA CUNHA GROUP / TRISTAN DA CUNHA		-37.1	-37.2	-12.2	-12.3	SAE			s_64747 [482]	BASALT [482]									VOL					WR [482]	45.18	3.27		17.67				10.45	9.34	4.44	0.19		3.04	3.68	1.12
[482]	OCEAN ISLAND	TRISTAN DA CUNHA GROUP / TRISTAN DA CUNHA		-37.1	-37.2	-12.2	-12.3	SAE			s_64760 [482]	BASALT [482]									VOL					WR [482]	47.27	2.72		15.7				9.76	10.16	6.43	0.14		1.96	2.73	0.6
[482]	OCEAN ISLAND	TRISTAN DA CUNHA GROUP / TRISTAN DA CUNHA		-37.1	-37.2	-12.2	-12.3	SAE			s_64768 [482]	BASALT [482]									VOL					WR [482]	45.14	2.54		13.68				10.45	10.93	9.85	0.17		1.03	2.13	0.56
[482]	OCEAN ISLAND	TRISTAN DA CUNHA GROUP / TRISTAN DA CUNHA		-37.1	-37.2	-12.2	-12.3	SAE			s_125266 [482]	BASALT [482]							1927		VOL					WR [482]	46.74	2.85		15.62				10.04	10.26	7.71	0.15		1.76	2.6	0.52
[11317]	OCEAN ISLAND	TRISTAN DA CUNHA GROUP / TRISTAN DA CUNHA	PLANTATION GULCH, MAIN CLIFFS	-37.05	-37.05	-12.3	-12.3	SAE			s_ALR39T [11317]	NOT GIVEN [11317]									VOL					WR [11317]
[12389]	OCEAN ISLAND	TRISTAN DA CUNHA GROUP / INACCESSIBLE	JULY 29-30 ERUPTION, TRISTAN DA CUNHA	-37.05	-37.05	-12.3	-12.3	SAE			s_2004TDC2 [12389]	PHONOLITE [12389]					29	7	2004		VOL					WR [12389]	63.16	0.47		18.43				2.02	1.36	0.35	0.12		6.7	7.11	0.05
[1214]	OCEAN ISLAND	TRISTAN DA CUNHA GROUP / TRISTAN DA CUNHA		-37.1	-37.2	-12.2	-12.3	SAE			s_TR2.2 [1214]	TRACHYANDESITE [1214]									VOL					WR [1214]
[1214]	OCEAN ISLAND	TRISTAN DA CUNHA GROUP / TRISTAN DA CUNHA		-37.1	-37.2	-12.2	-12.3	SAE			s_TR3 [1214]	TRACHYANDESITE [1214]									VOL					WR [1214]
[2582]	OCEAN ISLAND	TRISTAN DA CUNHA GROUP / TRISTAN DA CUNHA	SANDY POINT	-37.05	-37.05	-12.3	-12.3	SAE			s_1 [2582]	BASALT, OLIVINE [2582]									VOL					WR [2582]	42.51	4.29		12.82		4.89	8.64		12.22	9.63	0.13		1.4	2.83	0.38		0.41	0.05
[2582]	OCEAN ISLAND	TRISTAN DA CUNHA GROUP / TRISTAN DA CUNHA	BEHIND SETTLEMENT	-37.05	-37.05	-12.3	-12.3	SAE			s_2 [2582]	BASALT, OLIVINE [2582]									VOL					WR [2582]	46.24	4.48		15.75		3.04	7.39		9.57	4.92	0.14		2.6	4.12	1.2		0.29	0.05
[2582]	OCEAN ISLAND	TRISTAN DA CUNHA GROUP / INACCESSIBLE	WEST POINT	-37.32	-37.32	-12.73	-12.73	SAE			s_3 [2582]	BASALT, OLIVINE [2582]									VOL					WR [2582]	47.76	3.05		15.68		3.34	6.55		9.02	6.05	0.07		1.94	4.22	0.49		1.87	0
[2582]	OCEAN ISLAND	TRISTAN DA CUNHA GROUP / TRISTAN DA CUNHA		-37.1	-37.2	-12.2	-12.3	SAE			s_4 [2582]	TRACHYBASALT [2582]									VOL					WR [2582]	47.44	4.02		17.17		3.1	7.07		9.78	4.65	0.14		2.95	3.71			0.28	0.11
[2582]	OCEAN ISLAND	TRISTAN DA CUNHA GROUP / TRISTAN DA CUNHA		-37.1	-37.2	-12.2	-12.3	SAE			s_5 [2582]	TRACHYBASALT [2582]									VOL					WR [2582]	46.31	3.64		17.36		3.27	8.12		9.74	4.64	0.17		2.79	3.67			0.21	0.08
[2582]	OCEAN ISLAND	TRISTAN DA CUNHA GROUP / INACCESSIBLE		-37.32	-37.32	-12.73	-12.73	SAE			s_8 [2582]	MUGEARITE [2582]									VOL					WR [2582]	49.3	3.18		16.36		3.69	5.94		7.4	5.31	0.16		1.71	4.09	0.49		1.67	0.49
[2582]	OCEAN ISLAND	TRISTAN DA CUNHA GROUP / TRISTAN DA CUNHA	FIRST LAGOON GLUCH	-37.05	-37.05	-12.3	-12.3	SAE			s_9 [2582]	TRACHYBASALT [2582]									VOL					WR [2582]	50.02	3.39		19.58		2.29	5.24		6.32	3.15	0.12		3.71	5.15	1.02		0.21	0
[2582]	OCEAN ISLAND	TRISTAN DA CUNHA GROUP / MIDDLE		-37	-37	-12	-12	SAE			s_10 [2582]	TRACHYBASALT [2582]									VOL					WR [2582]	48.76	2.93		15.1		4.23	5.27		7.45	3.54	0.07		3.96	4.43	0.83		3.11	0.43
[2582]	OCEAN ISLAND	TRISTAN DA CUNHA GROUP / MIDDLE	NE PEAK	-37	-37	-12	-12	SAE			s_11 [2582]	TRACHYBASALT [2582]									VOL					WR [2582]	50.64	2.5		21.75		0.19	5.93		6.88	2.56	0.07		3.73	5.27			0.44	0.31
[2582]	OCEAN ISLAND	TRISTAN DA CUNHA GROUP / MIDDLE	DIKE	-37	-37	-12	-12	SAE			s_12 [2582]	TRACHYBASALT [2582]									VOL					WR [2582]	52.13	2		20.48		3.81	2.2		5.55	1.96	0.07		3.75	3.92			2.21	1.96
[2582]	OCEAN ISLAND	TRISTAN DA CUNHA GROUP / NIGHTINGALE	EASTERN SECTION	-37	-37	-12	-12	SAE			s_13 [2582]	TRACHYANDESITE [2582]									VOL					WR [2582]	54.4	2.38		17.34		3.04	3.69		4.94	2.5	0.07		4.73	5.11	0.69		1.11	0
[2582]	OCEAN ISLAND	TRISTAN DA CUNHA GROUP / TRISTAN DA CUNHA	FIRST LAGOON GLUCH	-37.05	-37.05	-12.3	-12.3	SAE			s_14 [2582]	TRACHYANDESITE [2582]									VOL					WR [2582]	54.43	1.82		18.23		3.24	2.66		5.83	1.52	0.09		4.71	5.64	0.42		1.55	0
[2582]	OCEAN ISLAND	TRISTAN DA CUNHA GROUP / NIGHTINGALE	WESTERN SECTION	-37	-37	-12	-12	SAE			s_15 [2582]	TRACHYANDESITE [2582]									VOL					WR [2582]	55.51	2.12		18.2		3.04	4.03		4.67	2.05	0.13		3.15	5.43	0.56		0.56	0.25
[2582]	OCEAN ISLAND	TRISTAN DA CUNHA GROUP / NIGHTINGALE	WESTERN SECTION	-37	-37	-12	-12	SAE			s_16 [2582]	TRACHYANDESITE [2582]									VOL					WR [2582]	54.94	2.18		17.69		2.97	3.29		4.73	2.87	0.12		3.76	5.05	0.62		1.03	0.47
[2582]	OCEAN ISLAND	TRISTAN DA CUNHA GROUP / TRISTAN DA CUNHA	CAVE GULCH	-37.05	-37.05	-12.3	-12.3	SAE			s_17 [2582]	TRACHYANDESITE [2582]									VOL					WR [2582]	54.35	2.18		19.97		1.52	3.15		4.52	1.35	0.24		4.53	6.71	0.89		0.38	0.04
[2582]	OCEAN ISLAND	TRISTAN DA CUNHA GROUP / MIDDLE		-37	-37	-12	-12	SAE			s_18 [2582]	TRACHYTE, TEPHRITIC [2582]									VOL					WR [2582]	57.1	1.11		21.05		1.76	2.01		4.13	1.2	0.11		5.33	5.01			0.97	0.43
[2582]	OCEAN ISLAND	TRISTAN DA CUNHA GROUP / STOLTENHOFF		-37	-37	-12	-12	SAE			s_19 [2582]	TRACHYTE, BIOTITE [2582]									VOL					WR [2582]	59.91	1.21		18.44		2.88	1.2		2.73	0.97	0.07		5.83	6.05	0.22		0.3	0.16
[2582]	OCEAN ISLAND	TRISTAN DA CUNHA GROUP / TRISTAN DA CUNHA	CRATER LAKE	-37.05	-37.05	-12.3	-12.3	SAE			s_21 [2582]	TRACHYTE, SODALITE-PLAGIOCLASE [2582]									VOL					WR [2582]	58.2	1.33		19.1		2.24	1.28		3.58	0.81	0.08		5.94	6.3	0.21		0.9	0.13
[2582]	OCEAN ISLAND	TRISTAN DA CUNHA GROUP / NIGHTINGALE	EASTERN SECTION	-37	-37	-12	-12	SAE			s_22 [2582]	TRACHYTE, SODALITE [2582]									VOL					WR [2582]	62.23	0.65		18.43		1.68	0.6		1.16	0.11	0.12		6.28	6.77	0.07		1.6	0.06
[2582]	OCEAN ISLAND	TRISTAN DA CUNHA GROUP / TRISTAN DA CUNHA	STONY BEACH	-37.05	-37.05	-12.3	-12.3	SAE			s_23 [2582]	TRACHYTE, SODALITE [2582]									VOL					WR [2582]	58.71	0.39		20.03		2.16	0.45		0.98	0	0.1		6.03	7.56	0.06		3.19	0.22
[14234]	OCEAN ISLAND	TRISTAN DA CUNHA GROUP / TRISTAN DA CUNHA	SETTLEMENT	-37.05	-37.05	-12.3	-12.3	SAE			s_T3 [14234]	BASALT [14234]		1000000 [14234]							VOL					WR [14234]	42.53	4.11		14.27				14.05	11.72	6.82	0.16		1.56	2.83	0.58
[14234]	OCEAN ISLAND	TRISTAN DA CUNHA GROUP / TRISTAN DA CUNHA	BIG BAY	-37.05	-37.05	-12.3	-12.3	SAE			s_90648 [14234]	BASALT [14234]		1000000 [14234]							VOL					WR [14234]	41.93	4.1		13.87				13.52	12.36	6.89	0.16		1.86	2.52	0.54
[14234]	OCEAN ISLAND	TRISTAN DA CUNHA GROUP / INACCESSIBLE	WEST POINT	-37.32	-37.32	-12.73	-12.73	SAE			s_I48 [14234]	BASALT [14234]	900000 [14234]	3000000 [14234]							VOL					WR [14234]	48.66	2.76		16.82				9.25	9.29	5.9	0.14		2.02	3.62	0.52
[23527]	OCEAN ISLAND	TRISTAN DA CUNHA GROUP / TRISTAN DA CUNHA		-37.1	-37.2	-12.2	-12.3	SAE			s_BM 1962 128 (114) [23527]	BASALT [23527]									VOL					WR [23527]	44.6437	3.78568		14.1819		13.2408			11.5117	7.83422	0.17616		1.64262	2.69543	0.599424		0.0271297
[3061]	OCEAN ISLAND	TRISTAN DA CUNHA GROUP / TRISTAN DA CUNHA		-37.1	-37.2	-12.2	-12.3	SAE			s_TRISTAN13 [3061]	BASALT [3061]									VOL					WR [3061]
[3061]	OCEAN ISLAND	TRISTAN DA CUNHA GROUP / TRISTAN DA CUNHA		-37.1	-37.2	-12.2	-12.3	SAE			s_TRISTAN167 [3061]	BASALT [3061]									VOL					WR [3061]
[3061]	OCEAN ISLAND	TRISTAN DA CUNHA GROUP / TRISTAN DA CUNHA		-37.1	-37.2	-12.2	-12.3	SAE			s_TRISTAN567 [3061]	BASALT [3061]									VOL					WR [3061]
[16286]	OCEAN ISLAND	TRISTAN DA CUNHA GROUP / TRISTAN DA CUNHA		-37.1	-37.2	-12.2	-12.3	SAE			s_TR-7 [16286]	BASALT [16286]									VOL					WR [16286]
[16307]	OCEAN ISLAND	TRISTAN DA CUNHA GROUP / TRISTAN DA CUNHA		-37.1	-37.2	-12.2	-12.3	SAE			s_7 [16307]	NOT GIVEN [16307]				HOLOCENE [16307]					VOL					WR [16307]	45.98	3.22		16.33				10.42	9.06	4.48	0.18		3.02	4.2	0.95
[16307]	OCEAN ISLAND	TRISTAN DA CUNHA GROUP / TRISTAN DA CUNHA		-37.1	-37.2	-12.2	-12.3	SAE			s_10 [16307]	NOT GIVEN [16307]				HOLOCENE [16307]					VOL					WR [16307]	45.65	3.28		17.41				10	9.09	4.01	0.16		2.95	4.02	0.97
[16307]	OCEAN ISLAND	TRISTAN DA CUNHA GROUP / TRISTAN DA CUNHA		-37.1	-37.2	-12.2	-12.3	SAE			s_11 [16307]	NOT GIVEN [16307]				HOLOCENE [16307]					VOL					WR [16307]	45.02	3.31		15.93				11.1	9.51	4.87	0.18		1.25	5.19	0.85
[16307]	OCEAN ISLAND	TRISTAN DA CUNHA GROUP / TRISTAN DA CUNHA		-37.1	-37.2	-12.2	-12.3	SAE			s_22 [16307]	NOT GIVEN [16307]				HOLOCENE [16307]					VOL					WR [16307]	43.09	3.19		16.46				11.28	9.03	4.26	0.27		2.56	3.67	1.12
[16307]	OCEAN ISLAND	TRISTAN DA CUNHA GROUP / TRISTAN DA CUNHA		-37.1	-37.2	-12.2	-12.3	SAE			s_24 [16307]	NOT GIVEN [16307]				HOLOCENE [16307]					VOL					WR [16307]	51.78	1.86		18.59				6.43	6.45	1.94	0.18		2.68	5.96	0.65
[16307]	OCEAN ISLAND	TRISTAN DA CUNHA GROUP / TRISTAN DA CUNHA		-37.1	-37.2	-12.2	-12.3	SAE			s_38 [16307]	NOT GIVEN [16307]				HOLOCENE [16307]					VOL					WR [16307]	57.27	1.04		20.18				2.95	3.08	0.67	0.12		5.4	6	0.14
[16307]	OCEAN ISLAND	TRISTAN DA CUNHA GROUP / TRISTAN DA CUNHA		-37.1	-37.2	-12.2	-12.3	SAE			s_40 [16307]	NOT GIVEN [16307]				HOLOCENE [16307]					VOL					WR [16307]	51.84	2.29		19.17				6.03	5.89	2.25	0.15		4.2	5.31	0.76
[16307]	OCEAN ISLAND	TRISTAN DA CUNHA GROUP / TRISTAN DA CUNHA		-37.1	-37.2	-12.2	-12.3	SAE			s_41 [16307]	NOT GIVEN [16307]				HOLOCENE [16307]					VOL					WR [16307]	44.49	3.63		15.92				10.93	9.94	5.2	0.19		2.67	3.64	0.73
[16307]	OCEAN ISLAND	TRISTAN DA CUNHA GROUP / TRISTAN DA CUNHA		-37.1	-37.2	-12.2	-12.3	SAE			s_47 [16307]	NOT GIVEN [16307]				HOLOCENE [16307]					VOL					WR [16307]	50.05	2.28		18.97				6.98	6.54	2.4	0.17		3.86	4.91	0.7
[16307]	OCEAN ISLAND	TRISTAN DA CUNHA GROUP / TRISTAN DA CUNHA		-37.1	-37.2	-12.2	-12.3	SAE			s_52 [16307]	NOT GIVEN [16307]				HOLOCENE [16307]					VOL					WR [16307]	44.68	2.82		17.91				9.06	9.03	4.4	0.19		2.42	3.17	1.15
[16307]	OCEAN ISLAND	TRISTAN DA CUNHA GROUP / TRISTAN DA CUNHA		-37.1	-37.2	-12.2	-12.3	SAE			s_54 [16307]	NOT GIVEN [16307]				HOLOCENE [16307]					VOL					WR [16307]	46.04	3.08		17.38				9.1	8.4	4.14	0.16		3.38	4.21	1.2
[16307]	OCEAN ISLAND	TRISTAN DA CUNHA GROUP / TRISTAN DA CUNHA		-37.1	-37.2	-12.2	-12.3	SAE			s_85 [16307]	NOT GIVEN [16307]				HOLOCENE [16307]					VOL					WR [16307]	46.08	3.23		16.45				10.51	9.04	4.46	0.18		3.2	3.96	0.93
[16307]	OCEAN ISLAND	TRISTAN DA CUNHA GROUP / TRISTAN DA CUNHA		-37.1	-37.2	-12.2	-12.3	SAE			s_89 [16307]	NOT GIVEN [16307]				HOLOCENE [16307]					VOL					WR [16307]	45.91	3.3		17.38				9.45	9.03	3.77	0.18		1.03	5.36	1.15
[16307]	OCEAN ISLAND	TRISTAN DA CUNHA GROUP / TRISTAN DA CUNHA		-37.1	-37.2	-12.2	-12.3	SAE			s_93 [16307]	NOT GIVEN [16307]				HOLOCENE [16307]					VOL					WR [16307]	43.02	3.78		14.73				12.31	10.61	6.83	0.16		0.76	3.91	0.71
[16307]	OCEAN ISLAND	TRISTAN DA CUNHA GROUP / TRISTAN DA CUNHA		-37.1	-37.2	-12.2	-12.3	SAE			s_100 [16307]	NOT GIVEN [16307]				HOLOCENE [16307]					VOL					WR [16307]	45.4	3.21		16.4				10.58	9.1	4.44	0.18		3.04	3.96	0.95
[170][16286][174][173]	OCEAN ISLAND	TRISTAN DA CUNHA GROUP / TRISTAN DA CUNHA		-37.1	-37.2	-12.2	-12.3	SAE			s_TR-1NMNH110014 [170] / s_TR-1 [16286]	BASALT [170]									VOL			F		WR [170]
[170][174][173]	OCEAN ISLAND	TRISTAN DA CUNHA GROUP / TRISTAN DA CUNHA		-37.1	-37.2	-12.2	-12.3	SAE			s_TR-4NMNH110017 [170] / s_TR-4 [174]	BASALT [170]									VOL			F		WR [170]
[174][183][173]	OCEAN ISLAND	TRISTAN DA CUNHA GROUP / TRISTAN DA CUNHA		-37.1	-37.2	-12.2	-12.3	SAE			s_TR-5 [174]	BASALT [174]									VOL					WR [174]
[521][174][183][173][1214]	OCEAN ISLAND	TRISTAN DA CUNHA GROUP / TRISTAN DA CUNHA	HOTTENTOT GULCH	-37.05	-37.05	-12.3	-12.3	SAE			s_TR6 [521] / s_TR-6 [174]	BASANITE, ANKARAMITIC [521] / BASALT [174]								PORPHYRITIC [521]	VOL					WR [521]	42.75	4.04		14.24				14	12.03	6.78	0.18		1.93	2.88	0.57
[1392][1210][181][507]	OCEAN ISLAND	TRISTAN DA CUNHA GROUP / TRISTAN DA CUNHA		-37.1	-37.2	-12.2	-12.3	SAE			s_T-369 [1392] / s_T369 [507]	TRACHYBASALT [1392]									VOL					WR [1392]
[1392][1210][181][507]	OCEAN ISLAND	TRISTAN DA CUNHA GROUP / TRISTAN DA CUNHA		-37.1	-37.2	-12.2	-12.3	SAE			s_T-617 [1392] / s_T617 [507]	TRACHYANDESITE [1392]									VOL					WR [1392]
[504][523]	OCEAN ISLAND	TRISTAN DA CUNHA GROUP / TRISTAN DA CUNHA		-37.1	-37.2	-12.2	-12.3	SAE			s_TK3 [504]	BASALT, ALKALINE, OLIVINE [504]									VOL					WR [504]	42.7	4.18		14.8				14.43	11.4	8.1	0.15		1.75	2.52		0.75
[504][523]	OCEAN ISLAND	TRISTAN DA CUNHA GROUP / TRISTAN DA CUNHA		-37.1	-37.2	-12.2	-12.3	SAE			s_TK49 [504]	TRACHYANDESITE [504]									VOL					WR [504]	50.83	2.43		19.38				7.13	6.8	2.72	0.17		4.06	4.64	0.81
[504][523]	OCEAN ISLAND	TRISTAN DA CUNHA GROUP / TRISTAN DA CUNHA		-37.1	-37.2	-12.2	-12.3	SAE			s_TK15 [504]	TRACHYTE [504]									VOL					WR [504]	61.4	0.59		19.6		0.8	1.4		2	0.51	0.18		7.32	6.19	0.077
[523]	OCEAN ISLAND	TRISTAN DA CUNHA GROUP / TRISTAN DA CUNHA		-37.1	-37.2	-12.2	-12.3	SAE			s_TK34 [523]	BASALT, ALKALINE, OLIVINE [523]									VOL					WR [523]		4.04									0.15
[523]	OCEAN ISLAND	TRISTAN DA CUNHA GROUP / TRISTAN DA CUNHA		-37.1	-37.2	-12.2	-12.3	SAE			s_TK40 [523]	BASALT, ALKALINE, OLIVINE [523]									VOL					WR [523]		3.43									0.16
[523]	OCEAN ISLAND	TRISTAN DA CUNHA GROUP / TRISTAN DA CUNHA		-37.1	-37.2	-12.2	-12.3	SAE			s_TK7 [523]	BASALT, ALKALINE, OLIVINE [523]									VOL					WR [523]		3.7									0.18
[523]	OCEAN ISLAND	TRISTAN DA CUNHA GROUP / TRISTAN DA CUNHA		-37.1	-37.2	-12.2	-12.3	SAE			s_TK43 [523]	BASALT, ALKALINE, OLIVINE [523]									VOL					WR [523]		3.74									0.19
[523]	OCEAN ISLAND	TRISTAN DA CUNHA GROUP / TRISTAN DA CUNHA		-37.1	-37.2	-12.2	-12.3	SAE			s_TK20 [523]	BASALT, ALKALINE, OLIVINE [523]									VOL					WR [523]		3.96									0.17
[523]	OCEAN ISLAND	TRISTAN DA CUNHA GROUP / TRISTAN DA CUNHA		-37.1	-37.2	-12.2	-12.3	SAE			s_TK1 [523]	TRACHYANDESITE [523]									VOL					WR [523]		1.32									0.17
[521][7510]	OCEAN ISLAND	TRISTAN DA CUNHA GROUP / TRISTAN DA CUNHA	PLANTATION GULCH, MAIN CLIFFS	-37.05	-37.05	-12.3	-12.3	SAE			s_TDC58 [521]	BASANITE, ANKARAMITIC [521]								PORPHYRITIC [521]	VOL				HE(CCMSTP/G) from OLIVINE [7510], HE3_HE4(R/R(A)) from OLIVINE [7510]	WR [521] / MIN [7510]	41.34	4.27		13.73				14.69	11.79	8.1	0.19		1.48	2.82	0.58			0.33
[521][7510]	OCEAN ISLAND	TRISTAN DA CUNHA GROUP / TRISTAN DA CUNHA	PLANTATION GULCH, MAIN CLIFFS	-37.05	-37.05	-12.3	-12.3	SAE			s_TDC59 [521]	BASANITE, ANKARAMITIC [521]								PORPHYRITIC [521]	VOL				HE(CCMSTP/G) from OLIVINE [7510], HE3_HE4(R/R(A)) from OLIVINE [7510]	WR [521] / MIN [7510]	41.04	4.04		12.88				15.45	12.36	9.22	0.19		1.32	2.49	0.45			0.27
[521]	OCEAN ISLAND	TRISTAN DA CUNHA GROUP / TRISTAN DA CUNHA	PLANTATION GULCH, MAIN CLIFFS	-37.05	-37.05	-12.3	-12.3	SAE			s_TDC72 [521]	BASANITE, ANKARAMITIC [521]								PORPHYRITIC [521]	VOL					WR [521]	44.98	3.69		14.4				13.17	11.16	6.3	0.19		1.87	3.56	0.58			0.19
[521][11317]	OCEAN ISLAND	TRISTAN DA CUNHA GROUP / TRISTAN DA CUNHA	PLANTATION GULCH, MAIN CLIFFS	-37.05	-37.05	-12.3	-12.3	SAE			s_TDC88 [521]	BASANITE, ANKARAMITIC [521]								PORPHYRITIC [521]	VOL					WR [521]	42.63	4.05		13.99				13.85	11.82	7.5	0.22		1.84	3.37	0.66			0.17
[521]	OCEAN ISLAND	TRISTAN DA CUNHA GROUP / TRISTAN DA CUNHA	BETWEEN PLANTATION AND CAVES GULCHES	-37.05	-37.05	-12.3	-12.3	SAE			s_ALR39T [521]	BASANITE, ANKARAMITIC [521]								PORPHYRITIC [521]	VOL					WR [521]	42.51	4.07		13.97				13.87	11.74	7.4	0.2		1.9	3.36	0.67			0.12
[521]	OCEAN ISLAND	TRISTAN DA CUNHA GROUP / TRISTAN DA CUNHA	PLANTATION GULCH, MAIN CLIFFS	-37.05	-37.05	-12.3	-12.3	SAE			s_TDC61 [521]	BASANITE [521]								SPARSELY PHYRIC [521]	VOL					WR [521]	44.7	3.63		15.94				12.09	10.22	5.42	0.21		2.49	3.93	0.77			0.22
[521]	OCEAN ISLAND	TRISTAN DA CUNHA GROUP / TRISTAN DA CUNHA	PLANTATION GULCH, MAIN CLIFFS	-37.05	-37.05	-12.3	-12.3	SAE			s_TDC77 [521]	BASANITE [521]								APHYRIC [521]	VOL					WR [521]	44.37	3.65		15.2				12.77	10.92	6.06	0.19		2.28	3.97	0.64			0.16
[521]	OCEAN ISLAND	TRISTAN DA CUNHA GROUP / TRISTAN DA CUNHA	QUEEN MARY^S PEAK	-37.05	-37.05	-12.3	-12.3	SAE			s_TDC91 [521]	BASANITE [521]								SPARSELY PHYRIC [521]	VOL					WR [521]	46.19	3.42		16.73				10.37	9.42	4.77	0.21		3.19	4.36	0.79			0.16
[521]	OCEAN ISLAND	TRISTAN DA CUNHA GROUP / TRISTAN DA CUNHA	HOTTENTOT GULCH	-37.05	-37.05	-12.3	-12.3	SAE			s_ALR5T [521]	BASANITE [521]								SPARSELY PHYRIC [521]	VOL					WR [521]	44.29	3.52		15.72				11.93	9.75	6	0.19		2.72	3.99	0.92			0.16
[521]	OCEAN ISLAND	TRISTAN DA CUNHA GROUP / TRISTAN DA CUNHA	PLANTATION GULCH, MAIN CLIFFS	-37.05	-37.05	-12.3	-12.3	SAE			s_TDC85 [521]	BASANITE [521]								SPARSELY PHYRIC [521]	VOL					WR [521]	44.03	3.75		16.16				11.96	10.47	5.5	0.22		2.63	3.91	1.14			0.12
[521]	OCEAN ISLAND	TRISTAN DA CUNHA GROUP / TRISTAN DA CUNHA	BIG GULCH	-37.05	-37.05	-12.3	-12.3	SAE			s_ALR47T [521]	PHONOTEPHRITE [521]								PORPHYRIC [521]	VOL					WR [521]	50.23	2.28		19.38				6.94	5.98	2.43	0.2		4.73	5.44	0.94			0.17
[521]	OCEAN ISLAND	TRISTAN DA CUNHA GROUP / TRISTAN DA CUNHA	PLANTATION GULCH, MAIN CLIFFS	-37.05	-37.05	-12.3	-12.3	SAE			s_TDC84 [521]	PHONOTEPHRITE [521]								PORPHYRIC [521]	VOL					WR [521]	47.69	3.01		18.72				9.08	7.33	3.49	0.15		3.9	5.2	1.2			0.14
[521]	OCEAN ISLAND	TRISTAN DA CUNHA GROUP / TRISTAN DA CUNHA	HOTTENTOT GULCH	-37.05	-37.05	-12.3	-12.3	SAE			s_TDC1 [521]	PHONOLITE [521]								SPARSELY PHYRIC [521]	VOL					WR [521]	61.38	0.51		19.78				2.3	1.31	0.3	0.18		6.81	7.28	0.06			0.19
[521]	OCEAN ISLAND	TRISTAN DA CUNHA GROUP / TRISTAN DA CUNHA	STONYHILL POINT	-37.05	-37.05	-12.3	-12.3	SAE			s_TDC13 [521]	PHONOLITE [521]								SPARSELY PHYRIC [521]	VOL					WR [521]	58.34	1.13		19.9				3.69	2.91	0.76	0.13		5.88	5.7	0.2			0.48
[521]	OCEAN ISLAND	TRISTAN DA CUNHA GROUP / TRISTAN DA CUNHA	HOTTENTOT GULCH	-37.05	-37.05	-12.3	-12.3	SAE			s_TM4 [521]	PHONOLITE [521]								PORPHYRIC [521]	VOL					WR [521]	58.83	1.05		20.27				3.13	3.15	0.7	0.12		5.92	6.6	0.16
[1214]	OCEAN ISLAND	TRISTAN DA CUNHA GROUP / TRISTAN DA CUNHA		-37.1	-37.2	-12.2	-12.3	SAE			s_TR230 [1214]	TRACHYANDESITE [1214]									VOL					WR [1214]
[1291]	OCEAN ISLAND	TRISTAN DA CUNHA GROUP / TRISTAN DA CUNHA	SETTLEMENT	-37.05	-37.05	-12.3	-12.3	SAE			s_622 [1291]	TRACHYBASALT [1291]									VOL					WR [1291]	46.07	3.08		17.06		2.59	8.32		9.35	4.72	0.18		3.16	4.01	1.22		0.12	0.06
[1291]	OCEAN ISLAND	TRISTAN DA CUNHA GROUP / TRISTAN DA CUNHA	PIGBITE GULCH	-37.05	-37.05	-12.3	-12.3	SAE			s_347 [1291]	TRACHYBASALT [1291]									VOL					WR [1291]	46.36	3.54		16.19		3.66	6.94		9.45	4.57	0.18		3.15	3.97	1.42		0.29	0.19
[1291]	OCEAN ISLAND	TRISTAN DA CUNHA GROUP / TRISTAN DA CUNHA	THE PEAK	-37.05	-37.05	-12.3	-12.3	SAE			s_560 [1291]	TRACHYTE, PLAGIOCLASE [1291]									VOL					WR [1291]	58	1.2		19.5		1.7	2.2		3.3	1	0.1		5.3	6.5	0.2		0.2	0.1
[540][1308]	OCEAN ISLAND	TRISTAN DA CUNHA GROUP / TRISTAN DA CUNHA		-37.1	-37.2	-12.2	-12.3	SAE			s_442 [540]	TRACHYTE, BIOTITE [540]									VOL					WR [540]	56.32	1.7		18.11		2.02	3.2		4.1	1.68	0.14		5.94	5.42	0.58		0.41	0.29
[540][1291][1308]	OCEAN ISLAND	TRISTAN DA CUNHA GROUP / NIGHTINGALE		-37	-37	-12	-12	SAE			s_439 [540]	TRACHYTE [540] / TRACHYTE, ALKALI FELDSPAR [1291]									VOL					WR [540]	62.27	0.48		19.47		1.44	0.78		1.32	0.29	0.1		7.28	5.74	0.06		0.82	0.33					0.07
[9391][14579][15598]	OCEAN ISLAND	TRISTAN DA CUNHA GROUP / TRISTAN DA CUNHA		-37.1	-37.2	-12.2	-12.3	SAE			s_T 6 [9391]	BASANITE [9391] / BASALT, ALKALINE [14579]									VOL					WR [9391]	42.2	3.98		13.9		2.34	11.9	14	11.81	6.71	0.16		1.9	2.4	0.52
[9391][15598][14579]	OCEAN ISLAND	TRISTAN DA CUNHA GROUP / TRISTAN DA CUNHA		-37.1	-37.2	-12.2	-12.3	SAE			s_T 114 [9391]	BASANITE [9391] / BASALT, ALKALINE [15598]									VOL					WR [9391]	42.5	3.69		12.4		2.29	11.7	13.7	11.85	9.49	0.16		1.53	2.33	0.46
[9391][15598][14579]	OCEAN ISLAND	TRISTAN DA CUNHA GROUP / TRISTAN DA CUNHA		-37.1	-37.2	-12.2	-12.3	SAE			s_T 347 [9391]	TEPHRITE [9391] / BASALT, ALKALINE [15598]									VOL					WR [9391]	45.9	3.36		16.3		1.73	8.81	10.4	9.4	4.55	0.17		2.99	3.66	0.84
[9391][15598][14579]	OCEAN ISLAND	TRISTAN DA CUNHA GROUP / TRISTAN DA CUNHA		-37.1	-37.2	-12.2	-12.3	SAE			s_T 364 [9391]	TEPHRITE [9391] / BASALT, ALKALINE [15598]									VOL					WR [9391]	45.3	3.58		16.3		1.81	9.22	10.8	9.97	4.93	0.17		2.97	3.74	0.73
Abbreviations: MET: METAMORPHIC ROCK; PEG: PEGMATITE; PER: MANTLE XENOLITH; PLU: PLUTONIC ROCK; SED: SEDIMENTARY ROCK; VOL: VOLCANIC ROCK; VEIN: VEIN; ORE: ORE; WR: WHOLE ROCK; GL: VOLCANIC GLASS; MIN: MINERAL / COMPONENT (INCL. GROUNDMASS); INC: INCLUSION; LEACH: LEACH; SAE: SUBAERIAL; SAQ: SUBAQUATIC; F: FRESH; E: EXTENSIVELY ALTERED; M: MODERATELY ALTERED; S: SLIGHTLY ALTERED; T: ALMOST TOTALL…
References:
[94] WHITE W. M., HOFMANN A. W.: SR AND ND ISOTOPE GEOCHEMISTRY OF OCEANIC BASALTS AND MANTLE EVOLUTION NATURE 296 [1982] 821-825 doi: 10.1038/296821a0
[115] KURZ M. D., JENKINS W. J., HART S. R.: HELIUM ISOTOPIC SYSTEMATICS OF OCEANIC ISLANDS AND MANTLE HETEROGENEITY NATURE 297 [1982] 43-47 doi: 10.1038/297043a0
[170] NEWSOM H. E., WHITE W. M., JOCHUM K. P., HOFMANN A. W.: SIDEROPHILE AND CHALCOPHILE ELEMENT ABUNDANCES IN OCEANIC BASALTS, PB ISOTOPE EVOLUTION AND GROWTH OF THE EARTH^S CORE EARTH PLANET. SCI. LETT. 80 [1986] 299-313 doi: 10.1016/0012-821X(86)90112-3
[173] JOCHUM K. P., HOFMANN A. W.: CONSTRAINTS ON EARTH EVOLUTION FROM ANTIMONY IN MANTLE-DERIVED ROCKS CHEM. GEOL. 139 [1997] 39-49 GeoReM-id: 65 doi: 10.1016/S0009-2541(97)00032-6
[174] JOCHUM K. P., HOFMANN A. W., SEUFERT H. M.: TIN IN MANTLE-DERIVED ROCKS: CONSTRAINTS ON EARTH EVOLUTION GEOCHIM. COSMOCHIM. ACTA 57 [1993] 3585-3595 GeoReM-id: 69 doi: 10.1016/0016-7037(93)90141-I
[181] O^NIONS R. K., HAMILTON P. J., EVENSEN N. M.: VARIATIONS IN 143ND/144 ND AND 87SR/86SR RATIOS IN OCEANIC BASALTS EARTH PLANET. SCI. LETT. 34 [1977] 13-22 doi: 10.1016/0012-821X(77)90100-5
[183] HOFMANN A. W., JOCHUM K. P., SEUFERT H. M., WHITE W. M.: NB AND PB IN OCEANIC BASALTS: NEW CONSTRAINTS ON MANTLE EVOLUTION EARTH PLANET. SCI. LETT. 79 [1986] 33-45 doi: 10.1016/0012-821X(86)90038-5
[482] WEAVER B. L., WOOD D. A., TARNEY J., JORON J.-L.: GEOCHEMISTRY OF OCEAN ISLAND BASALTS FROM THE SOUTH ATLANTIC, ASCENSION, BOUVET, ST. HELENA, GOUGH AND TRISTAN DA CUNHA SPEC. PUBL. GEOL. SOC. LONDON 30 [1987] 253-267 doi: 10.1144/GSL.SP.1987.030.01.11
[504] ASAVIN A. M., KOGARKO L. N., KRYUCHKOVA O. I., TYURIN D. A., KOLESOV G. M.: THE GRAND CANARY, SAINT HELENA, AND TRISTAN DA CUNHA OCEANIC ISLANDS: VARIATIONS OF TRACE ELEMENT PARTITION COEFFICIENTS IN PYROXENE-MELT EQUILIBRIA DURING ALKALINE MAGMA EVOLUTION GEOCHEM. INT. 35 [1997] 415-423
[507] O^NIONS R. K., PANKHURST R. J.: PETROGENETIC SIGNIFICANCE OF ISOTOPE AND TRACE ELEMENT VARIATIONS IN VOLCANIC ROCKS FROM THE MID-ATLANTIC J. PETROL. 15 [1974] 603-634 doi: 10.1093/petrology/15.3.603
[509] OVERSBY V. M., GAST P. W.: ISOTOPIC COMPOSITION OF LEAD FROM OCEANIC ISLANDS J. GEOPHYS. RES. 75 [1970] 2097-2114 doi: 10.1029/JB075i011p02097
[510] HAMILTON E. I.: THE DETERMINATION OF URANIUM IN ROCKS AND MINERALS BY THE DELAYED NEUTRON METHOD EARTH PLANET. SCI. LETT. 1 [1966] 77-81 doi: 10.1016/0012-821X(66)90109-9
[511] KOGARKO L. N., ASAVIN A. M., BARSIKOV V. L., KOLESOV G. M., KRUCHKOVA O. I., POLYAKOV A. I., RAMENDIK G. I.: A GEOCHEMICAL MODEL FOR RARE-EARTH FRACTIONATION IN ALKALI-BASALT SERIES IN SOUTH ATLANTIC ISLANDS GEOCHEM. INT. 21 (5) [1984] 27-39
[517] BARSIKOV V. L., KOGARKO L. N., POLYAKOV A. I., IGNATENKO K. I., ZINOVE^EV A. I.: DIFFERENTIATION OF BASALTOID MELTS AND FORMATION OF THE VOLCANIC ROCK SERIES OF THE SOUTH ATLANTIC ISLANDS GEOCHEM. INT. 16 (6) [1979] 1-12
[520] CLIFF R. A., BAKER P. E., MATEER N. J.: GEOCHEMISTRY OF INACCESSIBLE ISLAND VOLCANICS CHEM. GEOL. 92 [1991] 251-260 doi: 10.1016/0009-2541(91)90073-Z
[521] LE ROEX A. P., CLIFF R. A., ADAIR B. J. I.: TRISTAN DA CUNHA, SOUTH ATLANTIC: GEOCHEMISTRY AND PETROGENESIS OF A BASANITE-PHONOLITE LAVA SERIES J. PETROL. 31 [1990] 779-812 doi: 10.1093/petrology/31.4.779
[523] KOGARKO L. N., BARSIKOV V. L., ASAVIN A. M., POLYAKOV A. I., CHERNOGOVOROVA S. M., KOROVKINA N. A., RAMENDIK G. I.: GEOCHEMISTRY OF THE IRON-GROUP ELEMENTS DURING THE FRACTIONAL DIFFERENTIATION OF OCEANIC-ISLAND ALKALI SERIES GEOCHEM. INT. 23 (2) [1986] 51-65
[537] LE MAITRE R. W.: KAERSUTITE-BEARING PLUTONIC XENOLITHS FROM TRISTAN DA CUNHA, SOUTH ATLANTIC MINERAL. MAG. 37 [1969] 185-197 doi: 10.1180/minmag.1969.037.286.05
[540] CARMICHAEL I. S. E.: TRACHYTES AND THEIR FELDSPAR PHENOCRYSTS MINERAL. MAG. 34 [1965] 107-125 doi: 10.1180/minmag.1965.034.268.09
[1210] PATCHETT P. J., TATSUMOTO M.: HAFNIUM ISOTOPE VARIATIONS IN OCEANIC BASALTS GEOPHYS. RES. LETT. 7 [1980] 1077-1080 doi: 10.1029/GL007i012p01077
[1214] SUN SHEN-SU: LEAD ISOTOPIC STUDY OF YOUNG VOLCANIC ROCKS FROM MID-OCEAN RIDGES, OCEAN ISLANDS AND ISLAND ARCS PHIL. TRANS. ROY. SOC. LONDON A297 [1980] 409-445 doi: 10.1098/rsta.1980.0224
[1291] BAKER P. E., GASS I. G., HARRIS P. G., LE MAITRE R. W.: THE VOLCANOLOGICAL REPORT OF THE ROYAL SOCIETY EXPEDITION TO TRISTAN DA CUNHA, 1962 PHIL. TRANS. ROY. SOC. LONDON A256 [1964] 439-575 doi: 10.1098/rsta.1964.0011
[1308] BERLIN R., HENDERSON C. M. B.: THE DISTRIBUTION OF SR AND BA BETWEEN THE ALKALI FELDSPAR, PLAGIOCLASE AND GROUNDMASS PHASES OF PORPHYRITIC TRACHYTES AND PHONOLITES GEOCHIM. COSMOCHIM. ACTA 33 [1969] 247-255 doi: 10.1016/0016-7037(69)90141-0
[1392] COHEN R. S., O^NIONS R. K.: IDENTIFICATION OF RECYCLED CONTINENTAL MATERIAL IN THE MANTLE FROM SR, ND, AND PB ISOTOPE INVESTIGATIONS EARTH PLANET. SCI. LETT. 61 [1982] 73-84 doi: 10.1016/0012-821X(82)90040-1
[2582] MITCHELL-THOME R. C.: GEOLOGY OF THE SOUTH ATLANTIC ISLANDS [1970] 1-350
[3061] YI W., HALLIDAY A. N., ALT J. C., LEE DER-CHUEN, REHKƒMPER M., GARCIA M. O., LANGMUIR C. H., SU Y.: CADMIUM, INDIUM, TIN, TELLURIUM, AND SULFUR IN OCEANIC BASALTS: IMPLICATIONS FOR CHALCOPHILE ELEMENT FRACTIONATION IN THE EARTH J. GEOPHYS. RES. B105 [2000] 18927-18948 doi: 10.1029/2000JB900152
[5216] DAVID K., SCHIANO P., ALLEGRE C.-J.: ASSESSMENT OF THE ZR/HF FRACTIONATION IN OCEANIC BASALTS AND CONTINENTAL MATERIALS DURING PETROGENETIC PROCESSES EARTH PLANET. SCI. LETT. 178 [2000] 285-301 doi: 10.1016/S0012-821X(00)00088-1
[6857] EWART A., MARSH J. S., MILNER D. M., DUNCAN A. R., KAMBER B. S., ARMSTRONG R. A.: PETROLOGY AND GEOCHEMISTRY OF EARLY CRETACEOUS BIMODAL CONTINENTAL FLOOD VOLCANISM OF THE NW ETENDEKA, NAMIBIA. PART 1: INTRODUCTION, MAFIC LAVAS AND RE-EVALUATION OF MANTLE SOURCE COMPONENTS J. PETROL. 45 [2004] 59-105 GeoReM-id: 750 doi: 10.1093/petrology/egg083
[7510] CLASS C., GOLDSTEIN S. L., STUTE M., KURZ M. D., SCHLOSSER P.: GRAND COMORE ISLAND: A WELL-CONSTRAINED ^LOW 3HE/4HE^ MANTLE PLUME EARTH PLANET. SCI. LETT. 233 [2005] 391-409 doi: 10.1016/j.epsl.2005.02.029
[9391] WILLBOLD M., STRACKE A.: TRACE ELEMENT COMPOSITION OF MANTLE END-MEMBERS: IMPLICATIONS FOR RECYCLING OF OCEANIC AND UPPER AND LOWER CONTINENTAL CRUST GEOCHEMISTRY GEOPHYSICS GEOSYSTEMS 7 [2006] GeoReM-id: 998 doi: 10.1029/2005GC001005
[11317] CLASS C., LE ROEX A. P.: CE ANOMALIES IN GOUGH ISLAND LAVAS - TRACE ELEMENT CHARACTERISTICS OF A RECYCLED SEDIMENT COMPONENT EARTH PLANET. SCI. LETT. 265 [2008] 475-486 GeoReM-id: 3995 doi: 10.1016/j.epsl.2007.10.030
[12389] REAGAN M. K., TURNER SIMON P., LEGG M., SIMS K. W. W., HARDS V. L.: 238U- AND 232TH-DECAY SERIES CONSTRAINTS ON THE TIMESCALES OF CRYSTAL FRACTIONATION TO PRODUCE THE PHONOLITE ERUPTED IN 2004 NEAR TRISTAN DE CUNHA, SOUTH ATLANTIC OCEAN GEOCHIM. COSMOCHIM. ACTA 72 [2008] 4367-4378 doi: 10.1016/j.gca.2008.06.002
[14234] GIBSON S. A., THOMPSON R. N., DAY J. A., HUMPHRIS S. E., DICKIN A. P.: MELT-GENERATION PROCESSES ASSOCIATED WITH THE TRISTAN MANTLE PLUME: CONSTRAINTS ON THE ORIGIN OF EM-1 EARTH PLANET. SCI. LETT. 237 [2005] 744-767 doi: 10.1016/j.epsl.2005.06.015
[14579] WILLBOLD M., STRACKE A.: FORMATION OF ENRICHED MANTLE COMPONENTS BY RECYCLING OF UPPER AND LOWER CONTINENTAL CRUST CHEM. GEOL. 276 [2010] 188-197 doi: 10.1016/j.chemgeo.2010.06.005
[15598] SALTERS V. J. M., MALLICK S., HART S. R., LANGMUIR C. H., STRACKE A.: DOMAINS OF DEPLETED MANTLE: NEW EVIDENCE FROM HAFNIUM AND NEODYMIUM ISOTOPES GEOCHEMISTRY GEOPHYSICS GEOSYSTEMS 12 [2011] GeoReM-id: 6231 doi: 10.1029/2011GC003617
[16286] ROCHA-JUNIOR E. R. V., PUCHTEL I. S., MARQUES L. S., WALKER R. J., MACHADO F. B., NARDY A. J. R., BABINSKI M., FIGUEIREDO A. M. G.: RE-OS ISOTOPE AND HIGHLY SIDEROPHILE ELEMENT SYSTEMATICS OF THE PARAN¡ CONTINENTAL FLOOD BASALTS (BRAZIL) EARTH PLANET. SCI. LETT. 337-338 [2012] 164-173 GeoReM-id: 7051 doi: 10.1016/j.epsl.2012.04.050
[16307] HICKS A., BARCLAY J., MARK D. F., LOUGHLIN S. C: TRISTAN DA CUNHA: CONSTRAINING ERUPTIVE BEHAVIOR USING THE 40AR/39AR DATING TECHNIQUE GEOLOGY 40 [2012] 723-726 doi: 10.1130/G33059.1
[23527] ISRAEL C., BOYET M., DOUCELANCE R., BONNAND P., FROSSARD P., AUCLAIR D., BOUVIER A.-S.: FORMATION OF THE CE-ND MANTLE ARRAY: CRUSTAL EXTRACTION VS. RECYCLING BY SUBDUCTION EARTH PLANET. SCI. LETT. 530 (115941) [2020] doi: 10.1016/j.epsl.2019.115941
[23592] MUNDL-PETERMEIER A., WALKER R. J., FISCHER R. A., LEKIC V., JACKSON M. G., KURZ M. D.: ANOMALOUS 182W IN HIGH 3HE/4HE OCEAN ISLAND BASALTS: FINGERPRINTS OF EARTH^S CORE? GEOCHIM. COSMOCHIM. ACTA 271 [2020] 194-211 doi: 10.1016/j.gca.2019.12.020
[24718] BRETT E. K. A., PRYTULAK J., REHKƒMPER M., HAMMOND S. J., CHAUVEL C., STRACKE A., WILLBOLD M.: THALLIUM ELEMENTAL AND ISOTOPIC SYSTEMATICS IN OCEAN ISLAND LAVAS GEOCHIM. COSMOCHIM. ACTA 301 [2021] 187-210 doi: 10.1016/j.gca.2021.02.035
[24778] WALOWSKI K. J., KIRSTEIN L. A., DE HOOG J. C. M., ELLIOTT T. R., SAVOV I. P., JONES R. E.: BORON RECYCLING IN THE MANTLE: EVIDENCE FROM A GLOBAL COMPARISON OF OCEAN ISLAND BASALTS GEOCHIM. COSMOCHIM. ACTA 302 [2021] 83-100 doi: 10.1016/j.gca.2021.03.017
[truncated: 121 more columns]

## Sheet: Mayotte
Published in Chauvel et al. EPSL, 626 (2024)
	Basaltes Est du Nouveau Volcan									Basaltes Nouveau Volcan
In bold new good ICPMS data
																															Pierre Traces	Pierre Traces																	analysees en cours
							Pierre Traces	Pierre Traces			Pierre Traces		Pierre Traces		Pierre Traces					Pierre Traces		Pierre Traces				Pierre Traces				Pierre Traces	2 fragments du meme sac	(a et b : 1 meme fragment coupé en 2, b à Clermont))	Pierre Traces	Pierre Traces	Pierre Traces	Pierre Traces				à supprimer du tableau		à supprimer du tableau		Pierre Traces	Pierre Traces
	DR 05 - 01 - 01	DR 05 - 01 - 02	DR 05 - 02	DR 05 - 03	DR 05 - 04	DR 05 - 05 a	DR 05 - 05 b	DR 05 - 05 c		DR 01 - 01 vrac	DR 01 - 01	DR 01 - 04 bloc	DR 01 - 04 bordure vitreuse		DR 01 - 05	DR 01 - 06		DR 08 - 01 ALF	DR 08 - 01 - 02 MB	DR 08 - 01 - 04	DR 08 - 01 - 08	DR 08 - 02 - 05	DR 10 - 02 - 01	DR 10 - 02 - 02	DR 10 - 04 - 01	DR 10 - 05 - 11a	DR 10 - 05 - 12	DR 10 - 06 - 01	DR 10 - 07	DR 10 - 08 - 03	DR 11	DR 11 a	DR 11 - 01 - 01 bordure vitreuse	DR 11 - 01 - 02	DR 11 - 02 - 05	DR 11 - 03 - 02	DR 11 - 04 - 02	DR 11 - 05 - 02	DR 11 - 06 - 03	DR 11 - 07 - 04	DR 11 - 07 - 04a	DR 11 - 07 - 04 - 1	DR 11 - 07 - 04 - 2	DR 11 - 08 - 01	DR 12 - 02 - 02a	DR 12 - 03 - 01	DR 12 - 05 - 01	DR 12 - 05 - 03	DR 14 - 01
														dup			Dup														ICP MS
SiO2 wt%	42.267	40.3916	40.8008	40.2939	40.9292	39.7633	41.2908	40.4989		45.0831	44.783	44.6945	44.2195		45.9416	44.6398		46.351	46.0568	45.9022	42.1026	42.9414	45.3629	45.1389	46.2193	46.3894	45.8458	46.3914	46.1835	44.675	45.8161	45.5781	45.8254	45.9257	45.4358	45.8757	44.1958	45.0224	45.9462	46.244	42.0238	45.3049	46.2838	46.1886	45.018	44.6771	44.6019	44.8128	46.253
TiO2	4.32913	4.03517	4.0264	4.00777	4.07963	3.97247	4.12527	4.07143		3.3366	3.3226	3.41647	3.20633		3.40533	3.34277		2.89683	2.92353	2.85917	3.0519	3.0924	3.06517	3.01883	3.1015	3.11567	3.08483	3.11763	3.11213	2.9944	2.76712	3.03683	2.96727	2.96203	3.03127	2.97507	2.7869	2.7706	2.99103	2.74533	2.9369	3.03193	3.10147	2.97007	3.4245	3.29753	3.1726	3.2253	2.9598
Al2O3	12.6225	12.3028	12.5914	11.9761	12.2452	11.8375	12.3061	12.4014		14.5007	14.3813	14.5186	14.4389		14.6151	14.2277		15.0232	15.024	15.1901	13.4658	14.0274	15.0616	14.8496	15.2132	15.4082	14.6891	14.6152	15.088	14.7191	15.9316	14.2159	15.1678	14.8126	15.032	14.9424	14.3268	14.557	14.9332	16.0375	11.7156	14.2609	14.6077	15.4004	13.9596	14.2594	13.9978	14.5209	15.0243
Fe2O3 t	17.0267	15.8742	15.697	15.8	16.1502	15.6384	16.268	15.9673		14.31	14.4181	14.2896	13.9067		14.8187	14.1616		13.459	13.6196	13.3347	14.6261	14.4485	13.6943	13.5159	13.7893	13.8617	13.7858	13.9332	13.9281	13.4269	13.2892	13.9599	13.5139	13.6021	13.6405	13.5937	12.7396	12.4761	13.3842	13.2062	13.818	13.8113	14.2535	13.5529	14.5709	14.006	13.3255	13.5727	13.6957
MgO	5.66573	5.45103	5.1591	5.37003	5.54503	5.15843	5.46157	5.4536		4.53047	4.4493	4.8049	4.24647		4.58133	4.65297		3.63073	3.642	3.6705	4.0683	3.802	4.01143	3.9789	3.99417	4.06393	4.0538	4.1019	4.0628	3.91397	4.25244	3.25253	3.6883	3.7645	4.06647	3.79487	3.49827	3.37403	3.879	4.38044	9.44903	3.5642	3.65397	3.67113	4.09503	4.3911	4.14653	4.2582	3.6526
MnO	0.243767	0.233233	0.2291	0.227733	0.2306	0.2291	0.236633	0.230867		0.2256	0.228267	0.218767	0.222033		0.2328	0.219967		0.2299	0.233667	0.228333	0.279833	0.2517	0.228333	0.2271	0.2303	0.232367	0.2299	0.229867	0.231733	0.223133	0.227508	0.232067	0.2313	0.233967	0.226933	0.232167	0.2238	0.222333	0.2289	0.227442	0.203633	0.231267	0.2375	0.231333	0.2267	0.222167	0.215567	0.220567	0.239533
CaO	9.04913	8.37973	8.45637	8.32457	8.49747	8.1025	8.5902	8.43273		7.0031	7.02503	7.1872	6.76907		7.18273	7.02377		6.37743	6.3624	6.24817	8.50683	8.32613	6.5747	6.4928	6.68433	6.6923	6.62073	6.69917	6.67477	6.42147	7.2188	6.51173	6.3135	6.31017	6.59173	6.35817	6.12833	6.237	6.57697	7.23512	11.3875	6.40707	6.6159	6.3727	7.2536	6.98613	6.8797	6.9729	6.12647
Na2O	3.8766	3.3508	3.8758	3.94613	3.76313	3.47907	3.9066	3.5653		3.99067	4.0062	3.8898	4.0497		4.06807	3.92523		4.36663	4.3302	4.42493	4.03827	4.29087	4.3499	4.15977	4.27997	4.39453	4.23183	4.4586	4.1263	4.15923	4.6057	3.88337	4.44767	4.37523	4.24437	4.6293	4.3364	4.39633	4.36613	4.67287	2.4668	4.24947	4.19487	4.315	3.4677	4.0214	3.7776	3.8752	4.43053
K2O	2.9062	2.61863	2.8201	2.41427	2.6591	2.6253	2.6491	2.95283		2.27953	2.39123	2.19693	2.2823		2.43727	2.23003		2.6492	2.63247	2.5551	2.68813	2.68163	2.42827	2.41553	2.45007	2.47587	2.45807	2.49783	2.49927	2.40623	2.68138	2.6257	2.5182	2.51167	2.3628	2.55417	2.48223	2.48533	2.46867	2.68246	1.672	2.62337	2.66357	2.56377	2.35387	2.23677	2.2468	2.30097	2.61513
P2O5	1.7721	1.59687	1.6143	1.57647	1.6326	1.5664	1.63833	1.61547		1.55533	1.61633	1.50557	1.53797		1.6695	1.5247		1.66323	1.66617	1.60063	1.56457	1.61983	1.49743	1.5104	1.5319	1.544	1.52807	1.52663	1.55127	1.4774	1.47415	1.6279	1.5445	1.5436	1.553	1.55663	1.5581	1.56827	1.62853	1.45618	0.596767	1.61803	1.69987	1.57207	1.53277	1.47217	1.4828	1.50457	1.624
H2O+
H2O-
Total	99.7589	94.2341	95.2704	93.937	95.7322	92.3725	96.4726	95.1897		96.8151	96.6213	96.7223	94.879		98.9525	95.9485		96.6472	96.4909	96.0139	94.3924	95.4819	96.2741	95.3077	97.494	98.178	96.5279	97.5715	97.4578	94.4168	98.264	94.9239	96.2178	96.0416	96.1848	96.5122	92.2763	93.1093	96.4028	98.8876	96.2701	95.1024	97.3122		95.9026	95.5698	93.8467	95.2641	96.6211
L.O.I.
(ppm)
Li	10.3901	11.5768	9.5535	10.7805	10.2302	10.5542	10.044	8.45069		6.57267	5.97209	6.22805	6.08082		6.08912	6.27013		6.14991	6.33158	6.21549	7.92484	8.5179	6.55687	6.75566	6.33351	6.05546	6.52119	6.21234	6.63508	6.35872	6.40883	6.10527	6.36356	6.24066	5.94288	6.46485	6.31914	6.14909	5.95896	6.10484	6.90275	6.33316	6.36592	6.25928	5.87924	5.99639	6.06361	6.07878
Be	3.26158	3.75684	3.31367	3.19356	3.38592	3.52725	3.18674	3.18231		1.60519	1.47451	1.5936	1.558		1.62419	1.60564		1.60597	1.62909	1.52129	2.69981	2.66355	1.6349	1.86997	1.69183	1.52837	1.76906	1.77694	1.78476	1.54744	1.70914	1.74486	1.61763	1.67401	1.58707	1.66606	1.57889	1.65289	1.57413	1.61214	1.81712	1.55952	1.77742	1.63622	1.50888	1.70612	1.46329	1.57043
B	8.77438	10.7632	8.1031	7.05109	8.70748	12.2812				7.24064		6.39891				7.74238		2.52443	2.95604		5.6683		4.25094	3.60592	4.62452		3.1066	2.69462	4.13054								2.42406	2.58556	2.48866	3.28671	5.18288	3.37367	3.00772			3.74389	4.2404	4.00812
Sc	18.4456	18.3225	17.1415	17.964	19.3238	18.262	17.5334	16.2122		16.1353	13.5819	16.5869	13.1438		14.441	15.8105		13.8041	13.2195	12.4928	16.3307	14.7621	14.6391	14.3046	15.5537	13.9317	14.9324	14.0237	14.1706	13.9827	14.5081	15.0261	11.8424	13.9325	15.151	13.7371	13.1183	13.6385	13.8769	13.6126	23.9318	17.3021	15.8814	13.4652	14.7244	15.6952	15.1551	15.3397
V	181.064	189.966	172.892	180.211	192.354	190.241	175.766	175.784		159.369	138.623	163.038	138.958		138.339	159.56		102.81	105.772	103.945	122.767	122.789	137.876	139.243	134.79	128.327	136.134	135.058	132.023	125.967	115.814	115.897	114.742	114.43	118.493	116.456	114.76	106.433	122.339	112.427	273.454	117.849	120.323	113.497	150.183	160.944	148.377	146.742
Cr	103.282	107.239	93.021	103.406	110.653	110.057	101.963	104.181		88.1435	75.7358	89.3634	70.0203		73.1671	86.042		39.5498	44.3205	45.1244	43.9573	45.7088	70.4516	66.7223	61.6899	61.308	63.2232	65.4215	64.5366	59.7681	41.4153	49.851	41.3396	42.3483	55.2121	44.8117	42.0097	32.7436	55.0669	30.8502	415.942	36.3379	46.133	40.9752	79.7239	84.5607	71.4751	71.999
Co	43.8492	45.4968	41.1565	44.104	46.7585	46.2934	43.8127	43.2274		33.4004	33.1228	34.1643	30.0954		32.3947	33.0653		22.351	23.2399	24.0953	32.705	29.4594	28.8715	29.1267	29.5419	26.9635	28.3735	29.9083	28.0523	27.1148	24.5984	24.9176	24.722	24.8682	25.8179	25.3481	24.3422	24.0131	25.7133	24.581	58.9313	25.1812	25.6257	24.5371	30.1726	33.0646	31.2517	29.4651
Ni		72.5325			74.8948	73.7484				63.8227		66.7967				63.3							48.9889	48.2765	44.4416		47.0069	46.9415	46.123											35.6312	224.608	36.8379	39.6746			57.8698
Cu	39.4829	46.0166	40.4956	42.2957	44.1675	43.2438				24.8423		25.2587				25.7083		15.9302	16.6535		21.5904		22.1286	21.6943	21.9064		21.1717	23.201	20.5391								17.9274	20.3277	18.4017	18.6939	108.393	17.0501	18.1209			27.0923	26.0209	23.02
Zn	187.133	200.414	184.835	184.901	202.887	199.052				142.328		137.542				139.086		141.926	139.765		140.352		144.899	150.675	142.621		144.697	147.684	142.762								139.557	139.833	134.841	135.468	119.596	140.821	143.027			140.961	134.36	131.376
Ga	24.3445	25.8172	23.8124	24.1359	26.4302	26.1742				21.3828		20.5359				20.5663		20.8034	20.6471		20.4406		22.2822	23.0593	21.873		22.7508	22.7439	20.7712								20.85	20.3341	20.2638	20.3303	17.3522	20.1943	21.245			21.2078	20.3675	19.8666
Ge	1.73038	1.55924	1.77222	1.71299	1.73778	1.52323				1.34719		1.38215				1.41358		1.67827	1.7441		1.30823		1.42835	1.51972	1.58098		1.40423	1.32963	1.42456								1.61179	1.81784	1.74788	1.62766	1.02789	1.75202	1.3782			1.38377	1.67207	1.47621
As	2.99893	2.87607	2.41667	2.33555	2.63473	2.91703				1.88322		1.68179				1.9708		1.64945	2.09506		2.29015		1.65307	2.15488	1.58415		1.72935	2.0624	1.93498								1.88621	1.87495	1.77968	1.84347	1.3477	1.78672	1.52511			2.0664	2.00731	1.97524
Rb	65.0108	64.3271	61.0806	66.3008	65.2525	65.7743	62.5652	61.4295		44.7061	42.2197	41.7233	42.3191		42.7241	42.9237		45.3576	45.4141	45.5958	62.2088	65.7016	46.3295	47.5209	46.4979	44.8919	45.6606	45.9856	46.1993	43.8217	46.5465	45.3965	46.5105	45.391	42.851	46.5909	45.3551	45.4372	43.3114	44.134	38.688	44.5588	47.3788	45.8102	41.8789	43.1436	41.9471	41.5622
Sr	1270.43	1358.94	1280.79	1303.35	1373.77	1359.46	1275.11	1226.5		1972.38	1824.67	1840.81	1854.18		1846.88	1897.83		1923.75	1931.53	1923.83	1362.98	1411.82	1941.66	1997.06	1961.11	1842.53	1968.69	1928.58	1934.37	1831	1876.41	1885.3	1873.58	1861.2	1851.61	1878.41	1851.41	1878.37	1884.95	1863.22	807.18	1884.18	1973.53	1862	1764.63	1903.96	1790.58	1778.07
Y	47.3245	48.4467	46.073	46.3957	48.8376	48.4207	45.1655	45.2606		43.3464	40.1224	40.8713	40.6055		40.5689	41.9902		42.1037	42.0471	41.9368	42.0486	43.0352	42.7379	44.0366	43.0619	40.6358	43.0818	42.619	42.7179	40.4893	41.4041	41.5862	41.613	41.2053	40.5959	41.8658	41.2426	42.0184	41.2313	41.6115	26.2289	75.1767	83.1493	41.1455	39.4096	42.5089	40.3013	39.8768
Zr	560.688	589.959	555.706	560.202	590.46	592.722	552.928	553.084		287.317	269.924	271.746	272.964		272.038	308.137		289.503	292.18	290.078	409.025	425.754	300.636	308.195	301.986	286.705	306.341	299.201	299.383	284.85	291.652	293.434	292.204	290.188	277.461	292.397	287.677	292.933	281.629	292.314	267.272	795.969	908.158	290.544	274.459	327.788	274.885	271.322
Nb	134.398	139.389	132.552	133.974	139.588	138.73	127.402	127.238		81.2649	76.1734	76.2322	76.9356		76.8116	77.9709		80.8388	81.1605	82.5664	131.722	130.128	84.6472	86.9723	85.4362	80.2002	85.8113	84.5016	84.3138	79.7317	82.3064	82.7397	82.3916	81.7623	78.0896	83.489	80.9433	78.8491	78.7041	76.5229	79.1182	76.8685	87.3045	81.8837	75.1552	81.6236	74.6009	74.173
Mo	5.50012	5.2833	5.30708	5.28944	5.33984	5.37166				3.51954		3.24525				3.34622		3.72382	3.78872		4.51084		3.70275	3.81858	3.76658		3.59299	3.89065	3.66085								3.74502	3.9031	3.58886	4.19645	2.97116	4.20091	3.7359			3.60095	3.49097	3.42623
Ag	0.0622767	0.441642	0.1594	0.0820631	0.448639	0.432991				0.229627		0.21241				0.22574		0.143723	0.0854294		0.152992		0.234425	0.24004	0.239191		0.239959	0.237897	0.232584								0.114469	0.351838	0.0802257		0.226519		0.6296			0.236294	0.0850612	0.0565719
Cd	0.422884	0.62136	0.420882	0.420786	0.624358	0.603686				0.236426		0.23409				0.323204		0.227924	0.251347		0.374935		0.186386	0.336337	0.255072		0.313684	0.282002	0.221992								0.27949	0.239725	0.273573	0.243734	0.354723	0.468631	0.553135			0.30427	0.269392	0.294062
Sn	3.30604	3.47013	3.14781	3.29588	3.29524	3.25679				1.74351		1.63581				1.80043		1.54774	1.57532		2.22396		1.71618	1.76996	1.68017		1.67457	1.81329	1.70323								1.60075	2.18462	1.53437	1.61525	6.93686	1.65223	1.63496			2.13144	1.69882	1.59565
Sb	0.18447	0.26416	0.16173	0.133934	0.226995	0.251798				0.108429		0.0894312				0.0980591		0.067267	0.0581465		0.144561		0.10538	0.102664	0.0999477		0.10293	0.116014	0.0974579								0.0565831	0.0631222	0.0543579	0.116655	0.106748	0.0823606	0.0943009			0.0992117	0.0514809	0.0685825
Cs	0.703388	0.692179	0.650796	0.610693	0.705892	0.7045	0.646864	0.649953		0.340829	0.31981	0.335817	0.328		0.320695	0.342082		0.344808	0.348165	0.325287	0.579282	0.625656	0.355752	0.362474	0.357088	0.34216	0.340026	0.35734	0.351704	0.343861	0.351394	0.361026	0.340293	0.338722	0.310734	0.349344	0.339992	0.346959	0.333863	0.482668	0.407614	0.518286	0.357885	0.347776	0.329674	0.344387	0.334416	0.333042
Ba	845.291	941.531	848.903	855.348	937.763	936.015	863.296	860.449		1945.36	2105.01	1783.22	2058.44		2133.06	1862.53		2192.35	2189.01	2295.71	1128.96	1186.22	2038.58	2078.88	2062.59	2071.59	2070.19	2019.22	2001.82	2066.43	2284.91	2154.33	2147.67	2241.5	2016.33	2168.36	2122.03	2147.11	2064.3	2168.44	604.653	2119.68	2095.33	2149.08	1890.63	1830.55	1918.02	1919.84
La	112.391	112.244	109.813	110.214	112.568	111.432	103.106	103.537		104.039	98.0239	96.601	99.1285		98.8845	99.9219		113.289	113.81	107.774	98.8883	97.7537	108.162	110.406	109.403	101.98	110.028	107.659	106.182	101.823	106.357	106.787	106.634	104.937	101.684	106.923	111.205	110.384	105.783	108.017	48.9084	106.02	111.383	106.363	95.8798	103.246	97.5928	97.2601
Ce	219.446	228.945	215.71	219.126	230.325	229.171	212.086	211.788		214.632	201.502	199.865	204.319		203.659	205.372		222.063	223.51	219.99	194.604	196.448	220.873	225.881	223.081	207.829	225.342	218.896	216.173	207.475	220.688	217.724	216.621	214.126	207.831	217.157	215.686	218.11	213.117	219.983	106.038	216.948	227.249	216.038	196.914	212.999	199.949	200.431
Pr	26.3457	27.3584	25.8882	26.0578	27.4912	27.0987	25.1372	25.2454		25.6434	24.151	23.9053	24.4992		24.4707	24.6112		26.4561	26.6766	26.1353	22.4672	23.107	26.3571	26.6935	26.5724	24.6493	26.7178	26.0604	25.5968	24.6583	25.7359	25.7834	25.9496	25.5171	24.8334	25.8932	25.6022	25.9119	25.4374	25.6833	11.684	25.2949	27.0009	25.7133	23.5414	25.1639	23.9727	23.7563
[truncated: 43 more rows]
[truncated: 56 more columns]

## Sheet: previously published Mayotte
CITATIONS	TECTONIC SETTING	LOCATION	LOCATION COMMENT	LATITUDE MIN	LATITUDE MAX	LONGITUDE MIN	LONGITUDE MAX	LAND OR SEA	ELEVATION MIN	ELEVATION MAX	SAMPLE NAME	ROCK NAME	MIN. AGE (YRS.)	MAX. AGE (YRS.)	GEOL.	AGE	ERUPTION DAY	ERUPTION MONTH	ERUPTION YEAR	ROCK TEXTURE	ROCK TYPE	DRILL DEPTH MIN	DRILL DEPTHAX	ALTERATION	MINERAL	MATERIAL	SIO2(WT%)	TIO2(WT%)	B2O3(WT%)	AL2O3(WT%)	CR2O3(WT%)	FE2O3(WT%)	FEO(WT%)	FEOT(WT%)	CAO(WT%)	MGO(WT%)	MNO(WT%)	NIO(WT%)	K2O(WT%)	NA2O(WT%)	P2O5(WT%)	H2O(WT%)	H2OP(WT%)	H2OM(WT%)	H2OT(WT%)	CO2(WT%)	CO1(WT%)	F(WT%)	CL(WT%)
[truncated: 102 more rows]
[truncated: 125 more columns]

[truncated: 2 more sheets:  Grande Comore, REUNION]
